# Supplementary material for: Mechanism and origin of enantioselectivity for organocatalyzed asymmetric heteroannulation of alkynes in the construction of axially chiral C2-arylquinoline
Source: Royal Society of Chemistry journal article supplement (doi:10.1039/d4ob01127a), 2024-01-01
Supplement: d4ob01127a1.pdf [file d4ob01127a1.pdf]

# Supporting information

## Mechanism and origin of enantioselectivity for organocatalyzed asymmetric heteroannulation of alkynes in construction of axially chiral C2-arylquinoline

Ge Gao <sup>a,†</sup>, Peng-Yu Liang <sup>a,†</sup>, Nengzhi Jin <sup>b,†</sup>, Zi-Bo Zhao <sup>a</sup>, Xiao-Cheng Tian <sup>a</sup>, Dong Xie, <sup>a</sup> Chi-Zhou Tu <sup>a</sup>, Hai-Rong Zhang <sup>a</sup>, and Pan-Pan Zhou <sup>\*,a</sup>, Zhaoyong Yang <sup>c,\*</sup>

<sup>a</sup> State Key Laboratory of Applied Organic Chemistry, Key Laboratory of Advanced Catalysis of Gansu Province, Advanced Catalysis Center, College of Chemistry and Chemical Engineering, Lanzhou University, 222 South Tianshui Road, Lanzhou 730000, P. R. China. Fax: +86-931-8912582, Tel: +86 931 8912862, \*E-mail: [zhoupp@lzu.edu.cn](mailto:zhoupp@lzu.edu.cn)

<sup>b</sup> Key Laboratory of Advanced Computing, Lanzhou 730000, P. R. China.

<sup>c</sup> Key Laboratory of Biotechnology of Antibiotics, Ministry of Health, Institute of Medicinal Biotechnology, Chinese Academy of Medical Sciences (CAMS) and Peking Union Medical College (PUMC), Beijing 100050, P. R. China. Email: [zhaoyongy@163.com](mailto:zhaoyongy@163.com)

<sup>†</sup>These authors contributed equally to this work.

## 1. Mayer bond order

The Mayer bond order are carried out on the optimized complexes, intermediates and transition states of the hydrogen-transfer process (**COM1A** to **IM1A** through **TS1A** and from **COM1B** to **IM1B** through **TS1B**) to verify the transfer process of H3 from O3 to C1 atom.

**Table S1** The Mayer bond order for the complexes, transition states and intermediates from the hydrogen-transfer processes.

|              | <b>COM1A</b> | <b>TS1A</b> | <b>IM1A</b> | <b>COM1B</b> | <b>TS1B</b> | <b>IM1B</b> |
|--------------|--------------|-------------|-------------|--------------|-------------|-------------|
| <b>O3-H3</b> | 0.77         | 0.31        | 0.00        | 0.80         | 0.35        | 0.06        |
| <b>C1-H3</b> | 0.00         | 0.48        | 0.91        | 0.00         | 0.42        | 0.83        |
| <b>C1-C2</b> | 2.57         | 2.28        | 1.85        | 2.78         | 2.32        | 2.04        |
| <b>C2-C3</b> | 1.09         | 1.36        | 1.64        | 1.09         | 1.43        | 1.60        |
| <b>C3-C4</b> | 1.38         | 1.18        | 1.08        | 1.35         | 1.15        | 1.05        |
| <b>C4-N5</b> | 1.03         | 1.33        | 1.52        | 1.16         | 1.33        | 1.50        |
| <b>N5-H5</b> | 0.81         | 0.83        | 0.76        | 0.89         | 0.83        | 0.78        |
| <b>O2-H5</b> | 0.06         | 0.09        | 0.15        | 0.04         | 0.12        | 0.16        |

## 2. QTAIM Analyses

QTAIM analyses are carried out on the optimized complexes, intermediates and transition states of the hydrogen-transfer process, pathways **I**, **I'**, **II** and **II'** to figure out the intermolecular interactions.

### 2.1 QTAIM analyses of COM1A, TS1A, IM1A, COM1B, TS1B and IM1B

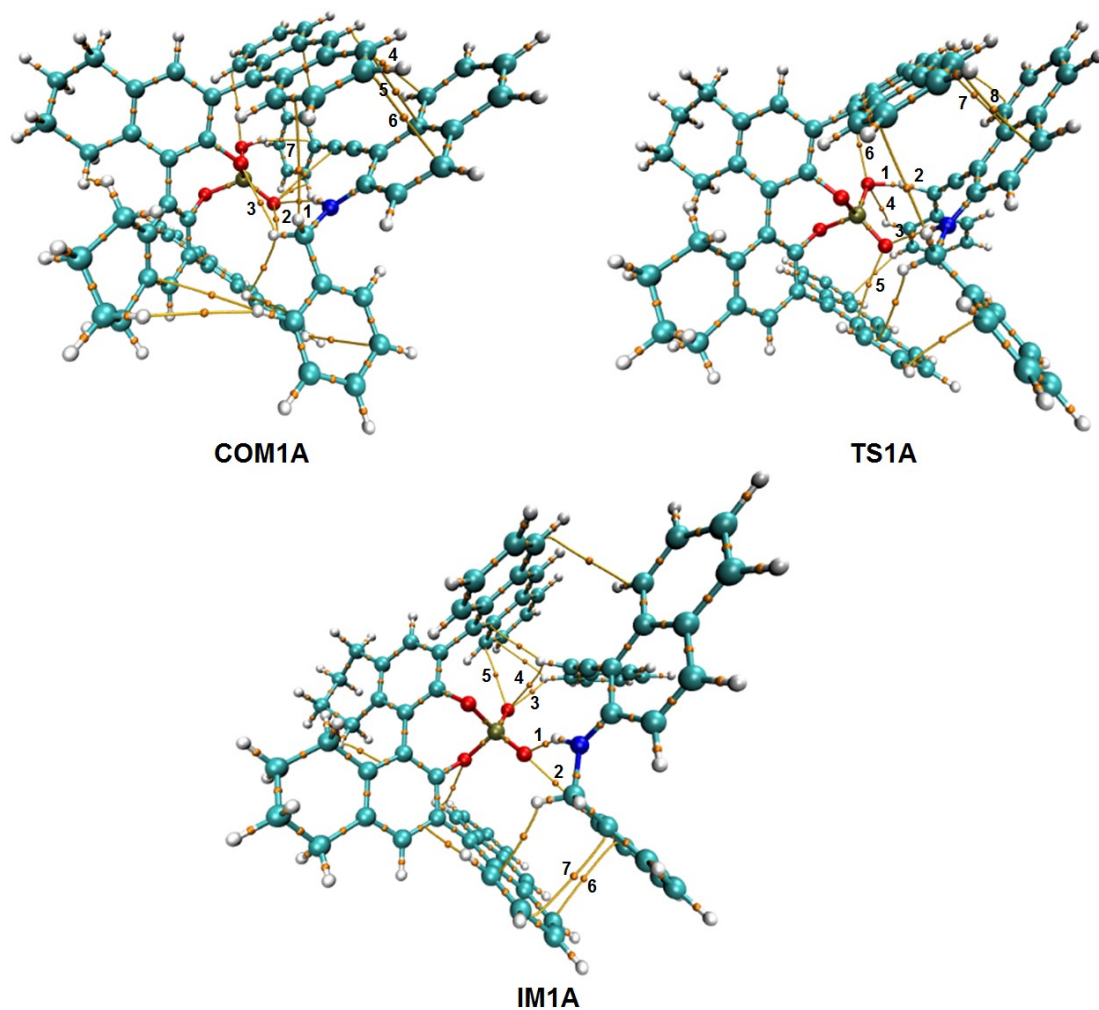

**Figure S1** QTAIM analyses of intermolecular interactions in **COM1A**, **TS1A** and **IM1A** in the hydrogen-transfer process and numbers of bond critical points (BCPs No.).

**Table S2** Numbers of bond critical points (BCPs No.) and the corresponding distances between atoms ( $d$ , in Å), classifications of the intermolecular interactions, electron density ( $\rho$ , in a.u.) and its Laplacian value ( $\nabla^2\rho$ , in a.u.), the electronic kinetic energy density ( $G$ , in a.u.), the electronic potential energy density ( $V$ , in a.u.) and the electronic energy density ( $H$ , in a.u.) at the BCPs of **COM1A**, **TS1A** and **IM1A** in hydrogen-transfer processes.

|              | BCPs No. | Classification | $d$  | $\rho$ | $\nabla^2\rho$ | $G$    | $V$     | $H$     |
|--------------|----------|----------------|------|--------|----------------|--------|---------|---------|
| <b>COM1A</b> | 1        | N-H...O        | 2.01 | 0.0224 | 0.07           | 0.0182 | -0.0189 | -0.0007 |
|              | 2        | C-H...O        | 2.67 | 0.0078 | 0.0296         | 0.0063 | -0.0053 | 0.0011  |
|              | 3        | C-H...O        | 2.67 | 0.0072 | 0.0272         | 0.0058 | -0.0049 | 0.001   |
|              | 4        | $\pi$ - $\pi$  | 3.23 | 0.0036 | 0.0109         | 0.0022 | -0.0016 | 0.0006  |
|              | 5        | $\pi$ - $\pi$  | 3.15 | 0.0086 | 0.0272         | 0.0056 | -0.0044 | 0.0012  |
|              | 6        | $\pi$ - $\pi$  | 3.28 | 0.0073 | 0.0225         | 0.0047 | -0.0037 | 0.001   |
|              | 7        | van der Waals  | 2.24 | 0.0166 | 0.0469         | 0.011  | -0.0103 | 0.0007  |
| <b>TS1A</b>  | 1        | O...H          | 1.33 | 0.1223 | 0.0416         | 0.0777 | -0.1449 | -0.0673 |
|              | 2        | H...C          | 1.29 | 0.1614 | -0.3448        | 0.0347 | -0.1555 | -0.1208 |
|              | 3        | N-H...O        | 1.76 | 0.0389 | 0.1352         | 0.0363 | -0.0388 | -0.0025 |
|              | 4        | C-H...O        | 2.52 | 0.0097 | 0.037          | 0.0075 | -0.0058 | 0.0017  |
|              | 5        | p- $\pi$       | 3.07 | 0.0078 | 0.0304         | 0.0061 | -0.0047 | 0.0015  |
|              | 6        | p- $\pi$       | 3.09 | 0.0081 | 0.0308         | 0.0062 | -0.0048 | 0.0015  |
|              | 7        | $\pi$ - $\pi$  | 3.24 | 0.0074 | 0.0225         | 0.0048 | -0.0039 | 0.0009  |
|              | 8        | $\pi$ - $\pi$  | 3.22 | 0.0073 | 0.0212         | 0.0045 | -0.0037 | 0.0008  |
| <b>IM1A</b>  | 1        | N-H...O        | 1.57 | 0.0631 | 0.1508         | 0.0545 | -0.0712 | -0.0168 |
|              | 2        | C-H...O        | 2.35 | 0.0112 | 0.0441         | 0.009  | -0.0069 | 0.0021  |
|              | 3        | C-H...O        | 2.24 | 0.0143 | 0.0596         | 0.0124 | -0.0099 | 0.0025  |
|              | 4        | C-H...O        | 2.40 | 0.0132 | 0.0497         | 0.0104 | -0.0083 | 0.002   |
|              | 5        | p- $\pi$       | 3.17 | 0.0066 | 0.0249         | 0.005  | -0.0038 | 0.0012  |
|              | 6        | $\pi$ - $\pi$  | 3.36 | 0.0066 | 0.0192         | 0.004  | -0.0032 | 0.0008  |
|              | 8        | $\pi$ - $\pi$  | 3.35 | 0.0066 | 0.0195         | 0.004  | -0.0032 | 0.0008  |

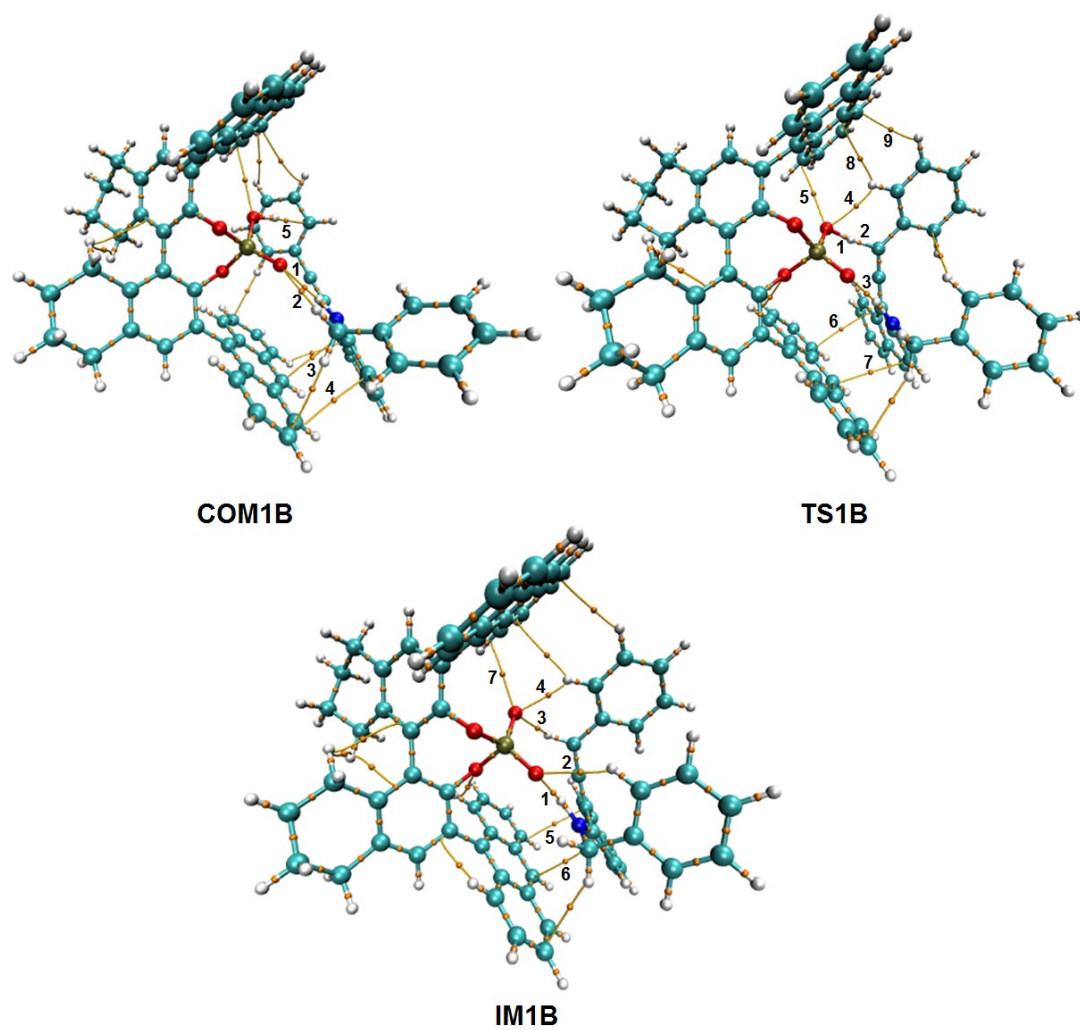

**Figure S2** QTAIM analyses of intermolecular interactions in **COM1B**, **TS1B** and **IM1B** in the hydrogen-transfer process and numbers of bond critical points (BCPs No.).

**Table S3** Numbers of bond critical points (BCPs No.) and the corresponding distances between atoms ( $d$ , in Å), classifications of the intermolecular interactions, electron density ( $\rho$ , in a.u.) and its Laplacian value ( $\nabla^2\rho$ , in a.u.), the electronic kinetic energy density ( $G$ , in a.u.), the electronic potential energy density ( $V$ , in a.u.) and the electronic energy density ( $H$ , in a.u.) at the BCPs of **COM1B**, **TS1B** and **IM1B** in the hydrogen-transfer processes.

|              | BCPs No. | Classification | $d$  | $\rho$ | $\nabla^2\rho$ | $G$    | $V$     | $H$     |
|--------------|----------|----------------|------|--------|----------------|--------|---------|---------|
| <b>COM1B</b> | 1        | N-H...O        | 2.08 | 0.0175 | 0.0791         | 0.0164 | -0.0131 | 0.0033  |
|              | 2        | C-H...O        | 2.38 | 0.0111 | 0.0455         | 0.0093 | -0.0073 | 0.002   |
|              | 3        | $\pi$ - $\pi$  | 3.29 | 0.008  | 0.0232         | 0.005  | -0.0042 | 0.0008  |
|              | 4        | $\pi$ - $\pi$  | 3.33 | 0.0064 | 0.0193         | 0.0041 | -0.0033 | 0.0008  |
|              | 5        | van der Waals  | 2.25 | 0.0157 | 0.049          | 0.0106 | -0.0091 | 0.0016  |
| <b>TS1B</b>  | 1        | O...H          | 1.26 | 0.1442 | -0.0497        | 0.0857 | -0.1838 | -0.0981 |
|              | 2        | H...C          | 1.33 | 0.1464 | -0.264         | 0.0367 | -0.1394 | -0.1027 |
|              | 3        | N-H...O        | 1.74 | 0.0389 | 0.1384         | 0.0367 | -0.0389 | -0.0021 |
|              | 4        | C-H...O        | 2.53 | 0.0087 | 0.0352         | 0.0071 | -0.0054 | 0.0017  |
|              | 5        | $\rho$ - $\pi$ | 3.13 | 0.0069 | 0.0268         | 0.0054 | -0.004  | 0.0013  |
|              | 6        | $\pi$ - $\pi$  | 3.40 | 0.0059 | 0.0179         | 0.0037 | -0.0029 | 0.0008  |
|              | 7        | $\pi$ - $\pi$  | 3.35 | 0.0072 | 0.0217         | 0.0045 | -0.0037 | 0.0009  |
|              | 8        | van der Waals  | 2.85 | 0.006  | 0.0194         | 0.004  | -0.0032 | 0.0008  |
|              | 9        | van der Waals  | 2.76 | 0.0069 | 0.0219         | 0.0046 | -0.0038 | 0.0009  |
| <b>IM1B</b>  | 1        | N-H...O        | 1.61 | 0.0569 | 0.151          | 0.0503 | -0.0629 | -0.0126 |
|              | 2        | C-H...O        | 2.49 | 0.0088 | 0.0328         | 0.0066 | -0.0051 | 0.0016  |
|              | 3        | C-H...O        | 2.08 | 0.0216 | 0.0845         | 0.0187 | -0.0163 | 0.0024  |
|              | 4        | C-H...O        | 2.3  | 0.0127 | 0.0504         | 0.0103 | -0.0081 | 0.0023  |
|              | 5        | $\pi$ - $\pi$  | 3.32 | 0.0073 | 0.0222         | 0.0047 | -0.0038 | 0.0009  |
|              | 6        | $\pi$ - $\pi$  | 3.24 | 0.0075 | 0.0227         | 0.0048 | -0.004  | 0.0008  |
|              | 7        | van der Waals  | 3.02 | 0.0088 | 0.0348         | 0.0071 | -0.0055 | 0.0016  |

2.2 QTAIM analyses of the intermediates and transition states in pathways I, I', II and II'

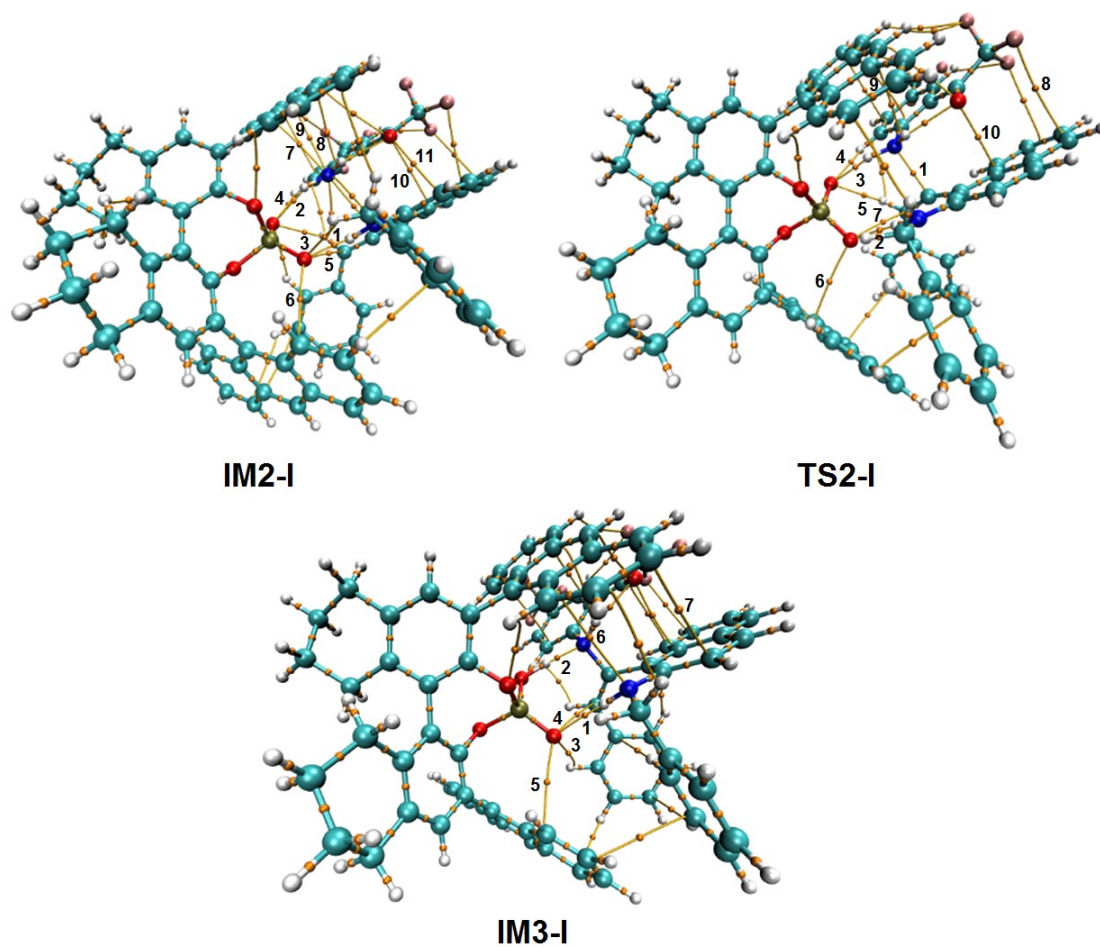

**Figure S3** QTAIM analyses of intermolecular interactions in **IM2-I**, **TS2-I** and **IM3-I** in pathway **I** and numbers of bond critical points (BCPs No.).

**Table S4** Numbers of bond critical points (BCPs No.) and the corresponding distances between atoms ( $d$ , in Å), classifications of the intermolecular interactions, electron density ( $\rho$ , in a.u.) and its Laplacian value ( $\nabla^2\rho$ , in a.u.), the electronic kinetic energy density ( $G$ , in a.u.), the electronic potential energy density ( $V$ , in a.u.) and the electronic energy density ( $H$ , in a.u.) at the BCPs of **IM2-I**, **TS2-I** and **IM3-I** in pathway I.

|              | BCPs No. | Classification | $d$  | $\rho$ | $\nabla^2\rho$ | $G$    | $V$     | $H$     |
|--------------|----------|----------------|------|--------|----------------|--------|---------|---------|
| <b>IM2-I</b> | 1        | N-H...O        | 1.70 | 0.0438 | 0.1374         | 0.0349 | -0.0355 | -0.0006 |
|              | 2        | N-H...O        | 1.89 | 0.0314 | 0.0948         | 0.0248 | -0.0258 | -0.0011 |
|              | 3        | C-H...O        | 2.50 | 0.0109 | 0.0430         | 0.0095 | -0.0082 | 0.0013  |
|              | 4        | C-H...O        | 2.37 | 0.0114 | 0.0404         | 0.0093 | -0.0085 | 0.0008  |
|              | 5        | p- $\pi$       | 3.07 | 0.0091 | 0.0290         | 0.0065 | -0.0057 | 0.0008  |
|              | 6        | p- $\pi$       | 3.31 | 0.0052 | 0.0187         | 0.0039 | -0.0031 | 0.0008  |
|              | 7        | p- $\pi$       | 3.19 | 0.0087 | 0.0272         | 0.0061 | -0.0053 | 0.0007  |
|              | 8        | p- $\pi$       | 3.21 | 0.0088 | 0.0284         | 0.0062 | -0.0054 | 0.0009  |
|              | 9        | $\pi$ - $\pi$  | 3.40 | 0.0063 | 0.0180         | 0.0038 | -0.0030 | 0.0007  |
|              | 10       | $\pi$ - $\pi$  | 3.26 | 0.0065 | 0.0222         | 0.0044 | -0.0033 | 0.0011  |
|              | 11       | $\pi$ - $\pi$  | 2.96 | 0.0105 | 0.0362         | 0.0080 | -0.0069 | 0.0011  |
| <b>TS2-I</b> | 1        | C...N          | 2.20 | 0.0516 | 0.0804         | 0.0281 | -0.0362 | -0.0080 |
|              | 2        | N-H...O        | 1.72 | 0.0423 | 0.1377         | 0.0387 | -0.0430 | -0.0043 |
|              | 3        | N-H...O        | 1.76 | 0.0398 | 0.1291         | 0.0357 | -0.0391 | -0.0034 |
|              | 4        | C-H...O        | 2.35 | 0.0114 | 0.0458         | 0.0094 | -0.0073 | 0.0021  |
|              | 5        | C-H...O        | 2.28 | 0.0148 | 0.0562         | 0.0118 | -0.0096 | 0.0022  |
|              | 6        | p- $\pi$       | 3.34 | 0.0055 | 0.0200         | 0.0039 | -0.0028 | 0.0011  |
|              | 7        | p- $\pi$       | 1.08 | 0.2861 | -1.0204        | 0.0364 | -0.3280 | -0.2915 |
|              | 8        | p- $\pi$       | 3.67 | 0.0023 | 0.0083         | 0.0015 | -0.0010 | 0.0005  |
|              | 9        | $\pi$ - $\pi$  | 3.21 | 0.0077 | 0.0242         | 0.0051 | -0.0041 | 0.0010  |
|              | 10       | $\pi$ - $\pi$  | 2.91 | 0.0107 | 0.0433         | 0.0090 | -0.0072 | 0.0018  |
| <b>IM3-I</b> | 1        | N-H...O        | 1.92 | 0.0270 | 0.1110         | 0.0257 | -0.0236 | 0.0021  |
|              | 2        | O-H...N        | 1.62 | 0.0669 | 0.0673         | 0.0406 | -0.0645 | -0.0238 |
|              | 3        | C-H...O        | 2.81 | 0.0055 | 0.0211         | 0.0041 | -0.0030 | 0.0011  |
|              | 4        | p- $\pi$       | 3.14 | 0.0082 | 0.0268         | 0.0057 | -0.0046 | 0.0010  |
|              | 5        | p- $\pi$       | 3.22 | 0.0058 | 0.0222         | 0.0044 | -0.0032 | 0.0012  |
|              | 6        | $\pi$ - $\pi$  | 3.98 | 0.0023 | 0.0066         | 0.0013 | -0.0009 | 0.0004  |
|              | 7        | $\pi$ - $\pi$  | 4.04 | 0.0020 | 0.0058         | 0.0011 | -0.0007 | 0.0004  |



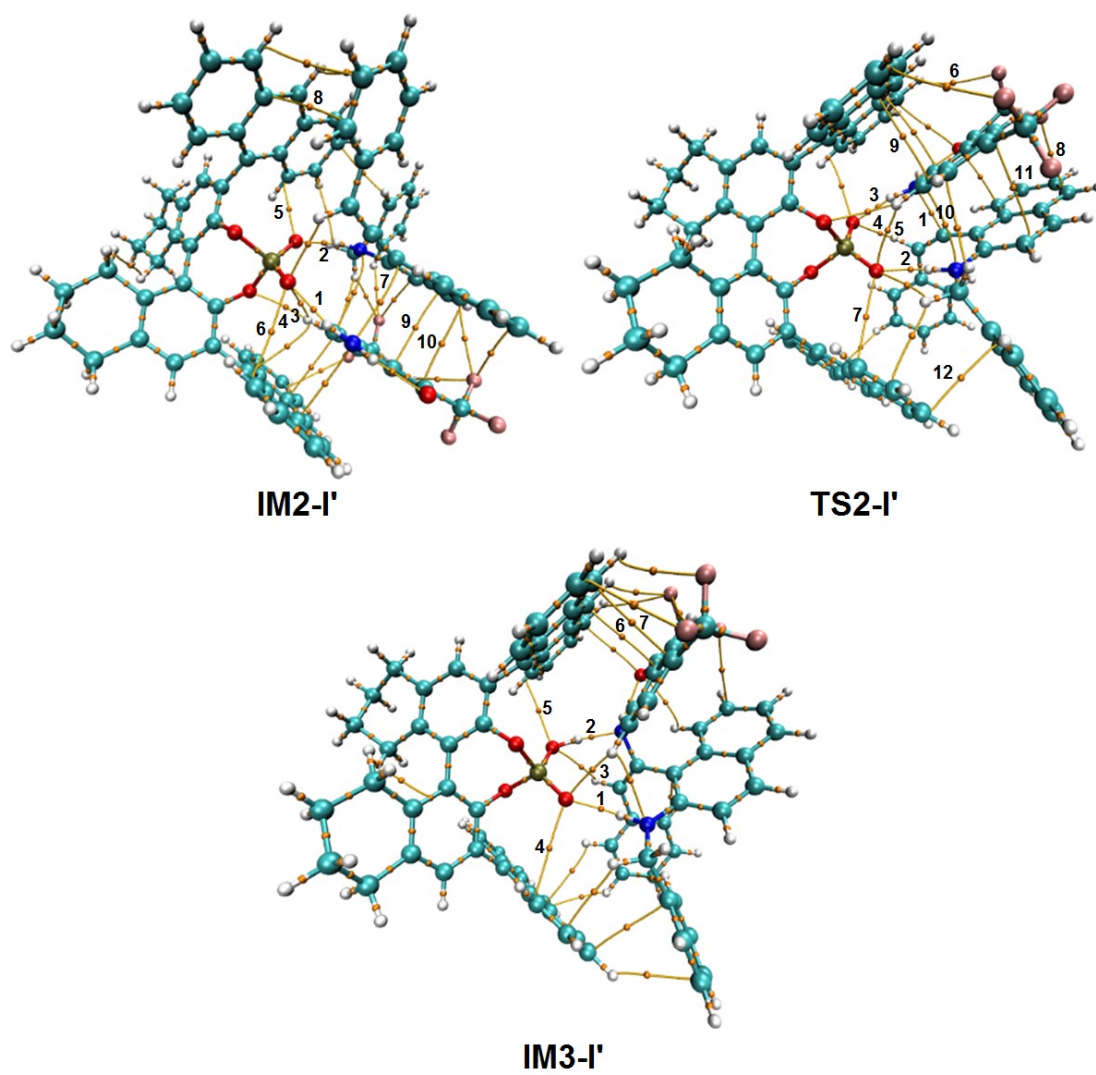

**Figure S4** QTAIM analyses of intermolecular interactions in **IM2-I'**, **TS2-I'** and **IM3-I'** in pathway **I'** and numbers of bond critical points (BCPs No.).

**Table S5** Numbers of bond critical points (BCPs No.) and the corresponding distances between atoms ( $d$ , in Å), classifications of the intermolecular interactions, electron density ( $\rho$ , in a.u.) and its Laplacian value ( $\nabla^2\rho$ , in a.u.), the electronic kinetic energy density ( $G$ , in a.u.), the electronic potential energy density ( $V$ , in a.u.) and the electronic energy density ( $H$ , in a.u.) at the BCPs of **IM2-I'**, **TS2-I'** and **IM3-I'** in pathway **I'**.

|               | BCPs No. | Classification | $d$  | $\rho$ | $\nabla^2\rho$ | $G$    | $V$     | $H$     |
|---------------|----------|----------------|------|--------|----------------|--------|---------|---------|
| <b>IM2-I'</b> | 1        | N-H...O        | 1.87 | 0.0277 | 0.1132         | 0.0264 | -0.0244 | 0.002   |
|               | 2        | N-H...O        | 1.54 | 0.0677 | 0.1491         | 0.0574 | -0.0775 | -0.0201 |
|               | 3        | C-H...O        | 2.47 | 0.0122 | 0.0437         | 0.0092 | -0.0074 | 0.0017  |
|               | 4        | C-H...O        | 2.37 | 0.0114 | 0.0451         | 0.0091 | -0.0069 | 0.0022  |
|               | 5        | p- $\pi$       | 3.03 | 0.0084 | 0.0330         | 0.0067 | -0.0052 | 0.0015  |
|               | 6        | p- $\pi$       | 3.43 | 0.0044 | 0.0150         | 0.0030 | -0.0022 | 0.0008  |
|               | 7        | p- $\pi$       | 3.24 | 0.0079 | 0.0273         | 0.0057 | -0.0045 | 0.0012  |
|               | 8        | $\pi$ - $\pi$  | 3.41 | 0.0061 | 0.0188         | 0.0038 | -0.003  | 0.0009  |
|               | 9        | $\pi$ - $\pi$  | 3.42 | 0.0066 | 0.0195         | 0.0040 | -0.0032 | 0.0008  |
|               | 10       | $\pi$ - $\pi$  | 3.24 | 0.0072 | 0.0220         | 0.0047 | -0.0038 | 0.0008  |
| <b>TS2-I'</b> | 1        | C...N          | 2.26 | 0.0466 | 0.0770         | 0.0253 | -0.0314 | -0.0061 |
|               | 2        | N-H...O        | 1.85 | 0.0309 | 0.1221         | 0.0295 | -0.0285 | 0.0010  |
|               | 3        | N-H...O        | 1.74 | 0.0410 | 0.1304         | 0.0367 | -0.0407 | -0.0041 |
|               | 4        | C-H...O        | 2.15 | 0.0181 | 0.0710         | 0.0153 | -0.0128 | 0.0025  |
|               | 5        | C-H...O        | 2.48 | 0.0109 | 0.0380         | 0.0078 | -0.0062 | 0.0017  |
|               | 6        | C-H...F        | 2.94 | 0.0029 | 0.0114         | 0.0022 | -0.0015 | 0.0007  |
|               | 7        | p- $\pi$       | 3.37 | 0.0047 | 0.0167         | 0.0033 | -0.0024 | 0.0009  |
|               | 8        | p- $\pi$       | 3.05 | 0.0070 | 0.0286         | 0.0056 | -0.0041 | 0.0015  |
|               | 9        | $\pi$ - $\pi$  | 3.30 | 0.0078 | 0.0237         | 0.0050 | -0.0040 | 0.0009  |
|               | 10       | $\pi$ - $\pi$  | 3.12 | 0.0091 | 0.0296         | 0.0063 | -0.0053 | 0.0011  |
|               | 11       | $\pi$ - $\pi$  | 3.73 | 0.0044 | 0.0128         | 0.0025 | -0.0018 | 0.0007  |
|               | 12       | $\pi$ - $\pi$  | 3.32 | 0.0071 | 0.0218         | 0.0046 | -0.0037 | 0.0009  |
| <b>IM3-I'</b> | 1        | N-H...O        | 2.00 | 0.0210 | 0.0932         | 0.0201 | -0.0168 | 0.0032  |
|               | 2        | O-H...N        | 1.68 | 0.0565 | 0.0755         | 0.0357 | -0.0526 | -0.0168 |
|               | 3        | C-H...O        | 2.31 | 0.0128 | 0.0488         | 0.0099 | -0.0076 | 0.0023  |
|               | 4        | p- $\pi$       | 3.58 | 0.0031 | 0.0110         | 0.0021 | -0.0014 | 0.0007  |
|               | 5        | p- $\pi$       | 3.26 | 0.0055 | 0.0212         | 0.0041 | -0.0030 | 0.0012  |
|               | 6        | $\pi$ - $\pi$  | 3.30 | 0.0075 | 0.0211         | 0.0045 | -0.0037 | 0.0008  |
|               | 7        | $\pi$ - $\pi$  | 3.22 | 0.0080 | 0.0225         | 0.0048 | -0.0041 | 0.0008  |

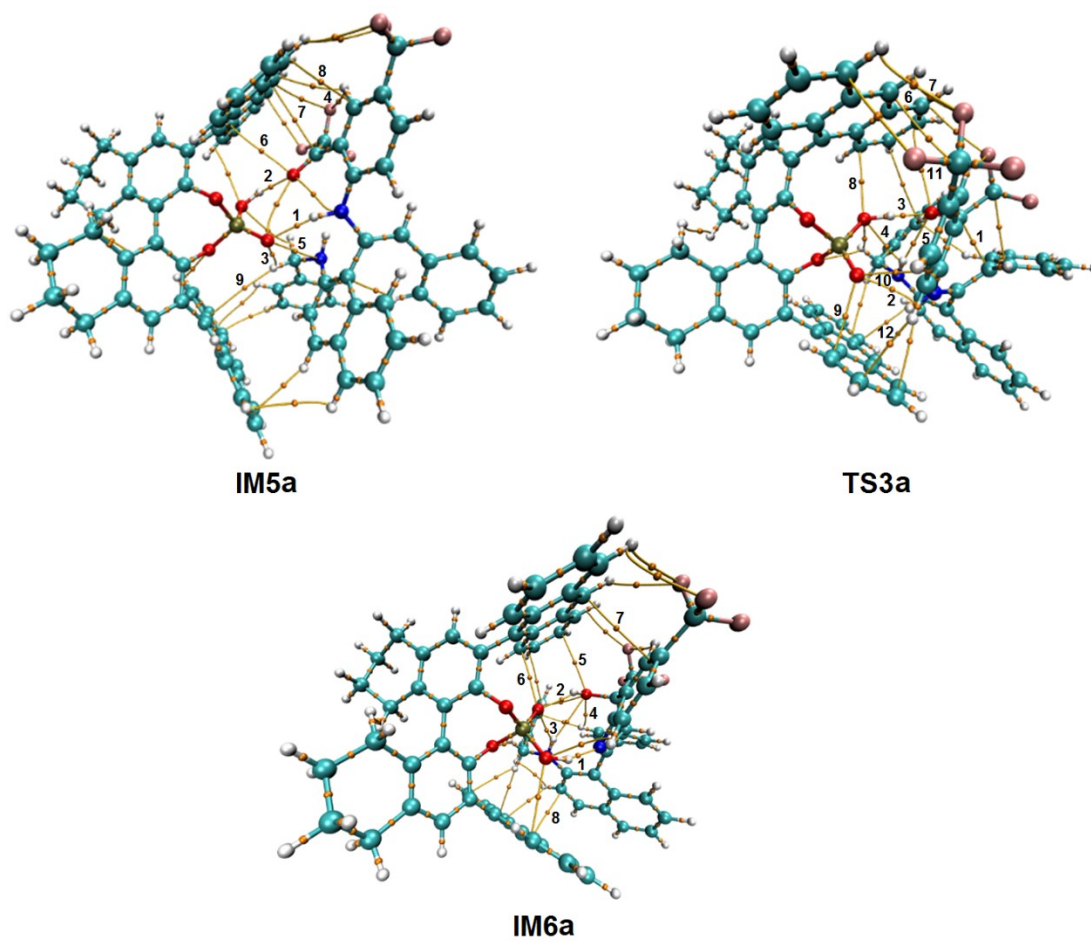

**Figure S5** QTAIM analyses of intermolecular interactions in **IM5a**, **TS3a** and **IM6a** in annulation processes by **IM4a** and numbers of bond critical points (BCPs No.).

**Table S6** Numbers of bond critical points (BCPs No.) and the corresponding distances between atoms ( $d$ , in Å), classifications of the intermolecular interactions, electron density ( $\rho$ , in a.u.) and its Laplacian value ( $\nabla^2\rho$ , in a.u.), the electronic kinetic energy density ( $G$ , in a.u.), the electronic potential energy density ( $V$ , in a.u.) and the electronic energy density ( $H$ , in a.u.) at the BCPs of **IM5a**, **TS3a** and **IM6a** in annulation processes by **IM4a**.

|             | BCPs No. | Classification | $d$  | $\rho$ | $\nabla^2\rho$ | $G$    | $V$     | $H$     |
|-------------|----------|----------------|------|--------|----------------|--------|---------|---------|
| <b>IM5a</b> | 1        | N-H...O        | 2.00 | 0.0199 | 0.0849         | 0.0180 | -0.0148 | 0.0032  |
|             | 2        | O-H...O        | 1.81 | 0.0311 | 0.1285         | 0.0313 | -0.0304 | 0.0009  |
|             | 3        | C-H...O        | 2.60 | 0.0098 | 0.0372         | 0.0077 | -0.0061 | 0.0016  |
|             | 4        | C-H...F        | 2.28 | 0.0131 | 0.0615         | 0.0124 | -0.0095 | 0.0029  |
|             | 5        | p- $\pi$       | 2.94 | 0.0112 | 0.0473         | 0.0100 | -0.0083 | 0.0018  |
|             | 6        | $\pi$ - $\pi$  | 3.44 | 0.0047 | 0.0163         | 0.0032 | -0.0022 | 0.0009  |
|             | 7        | $\pi$ - $\pi$  | 3.36 | 0.0060 | 0.0167         | 0.0035 | -0.0029 | 0.0006  |
|             | 8        | $\pi$ - $\pi$  | 3.16 | 0.0083 | 0.0257         | 0.0055 | -0.0046 | 0.0009  |
|             | 9        | van der Waals  | 3.62 | 0.0016 | 0.0045         | 0.0009 | -0.0006 | 0.0003  |
| <b>TS3a</b> | 1        | C...C          | 2.22 | 0.0567 | 0.0482         | 0.0220 | -0.0320 | -0.0100 |
|             | 2        | N-H...O        | 2.21 | 0.0167 | 0.0767         | 0.0162 | -0.0132 | 0.0030  |
|             | 3        | O-H...O        | 1.56 | 0.0631 | 0.1303         | 0.0521 | -0.0717 | -0.0196 |
|             | 4        | N-H...O        | 2.35 | 0.0120 | 0.0528         | 0.0106 | -0.0081 | 0.0026  |
|             | 5        | N-H...O        | 2.26 | 0.0129 | 0.0516         | 0.0105 | -0.0081 | 0.0024  |
|             | 6        | C-H...F        | 2.64 | 0.0062 | 0.0272         | 0.0053 | -0.0037 | 0.0015  |
|             | 7        | C-H...F        | 2.52 | 0.0081 | 0.0355         | 0.0070 | -0.0051 | 0.0019  |
|             | 8        | p- $\pi$       | 2.95 | 0.0095 | 0.0366         | 0.0076 | -0.0061 | 0.0015  |
|             | 9        | p- $\pi$       | 2.90 | 0.0104 | 0.0403         | 0.0084 | -0.0068 | 0.0017  |
|             | 10       | p- $\pi$       | 2.80 | 0.0133 | 0.0550         | 0.0118 | -0.0098 | 0.0020  |
|             | 11       | $\pi$ - $\pi$  | 3.60 | 0.0033 | 0.0116         | 0.0022 | -0.0015 | 0.0007  |
|             | 12       | $\pi$ - $\pi$  | 3.22 | 0.0084 | 0.0262         | 0.0056 | -0.0047 | 0.0009  |
| <b>IM6a</b> | 1        | N-H...O        | 1.60 | 0.0682 | 0.0815         | 0.0439 | -0.0674 | -0.0235 |
|             | 2        | O-H...O        | 1.98 | 0.0206 | 0.0895         | 0.0195 | -0.0166 | 0.0029  |
|             | 3        | N-H...O        | 1.98 | 0.0246 | 0.1027         | 0.0233 | -0.0208 | 0.0024  |
|             | 4        | C-H...O        | 2.46 | 0.0112 | 0.0441         | 0.0092 | -0.0073 | 0.0018  |
|             | 5        | p- $\pi$       | 3.34 | 0.0055 | 0.0185         | 0.0037 | -0.0027 | 0.0010  |
|             | 6        | p- $\pi$       | 3.02 | 0.0085 | 0.0322         | 0.0066 | -0.0052 | 0.0014  |
|             | 7        | $\pi$ - $\pi$  | 3.50 | 0.0051 | 0.0143         | 0.0029 | -0.0023 | 0.0006  |
|             | 8        | $\pi$ - $\pi$  | 3.23 | 0.0077 | 0.0224         | 0.0048 | -0.0040 | 0.0008  |

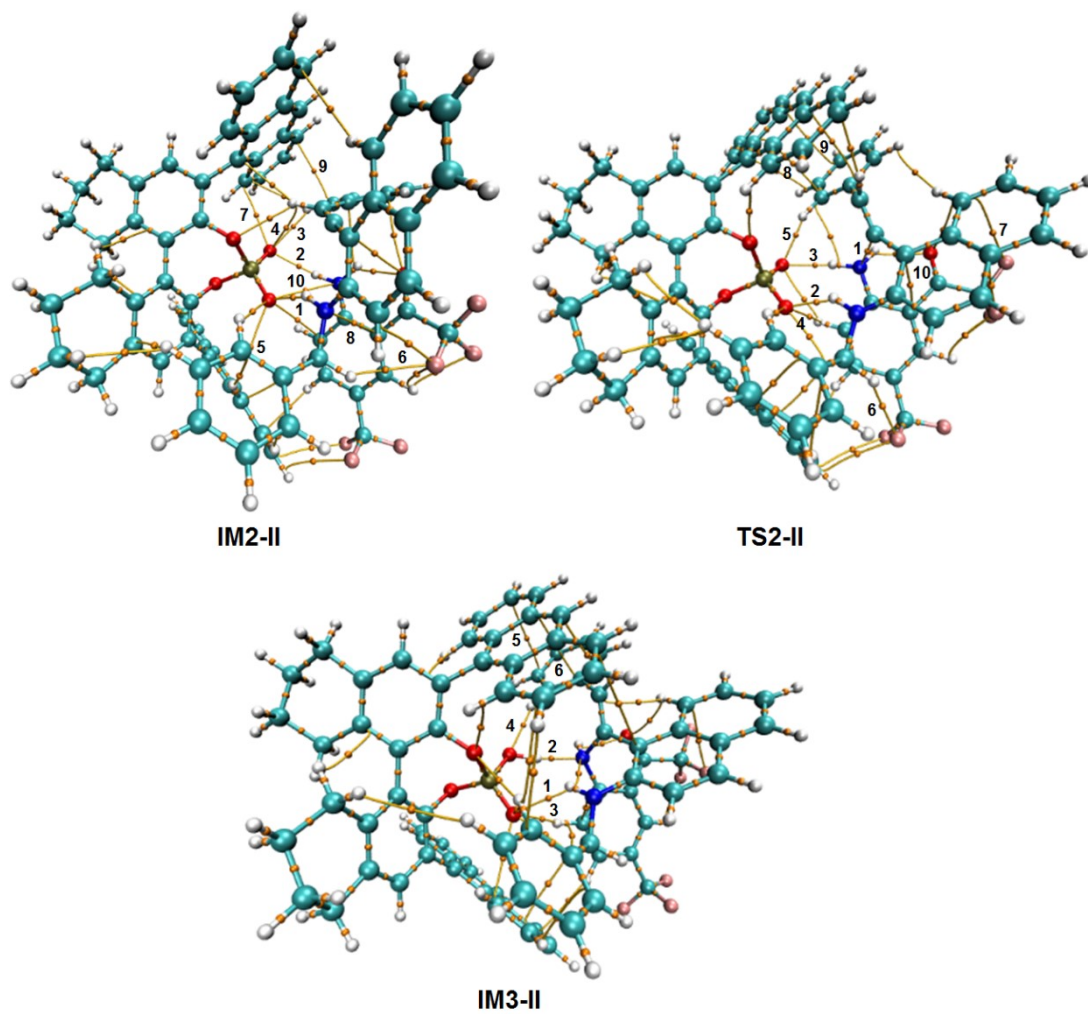

**Figure S6** QTAIM analyses of intermolecular interactions in **IM2-II**, **TS2-II** and **IM3-II** in pathway **II** and numbers of bond critical points (BCPs No.).

**Table S7** Numbers of bond critical points (BCPs No.) and the corresponding distances between atoms ( $d$ , in Å), classifications of the intermolecular interactions, electron density ( $\rho$ , in a.u.) and its Laplacian value ( $\nabla^2\rho$ , in a.u.), the electronic kinetic energy density ( $G$ , in a.u.), the electronic potential energy density ( $V$ , in a.u.) and the electronic energy density ( $H$ , in a.u.) at the BCPs of **IM2-II**, **TS2-II** and **IM3-II** in pathway **II**.

|               | BCPs No. | Classification | $d$  | $\rho$ | $\nabla^2\rho$ | $G$    | $V$     | $H$     |
|---------------|----------|----------------|------|--------|----------------|--------|---------|---------|
| <b>IM2-II</b> | 1        | N-H...O        | 1.64 | 0.0519 | 0.1587         | 0.0419 | -0.0441 | -0.0022 |
|               | 2        | N-H...O        | 2.05 | 0.0215 | 0.0610         | 0.0163 | -0.0173 | -0.0010 |
|               | 3        | C-H...O        | 2.33 | 0.0126 | 0.0435         | 0.0102 | -0.0095 | 0.0007  |
|               | 4        | C-H...O        | 2.60 | 0.0097 | 0.0360         | 0.0076 | -0.0061 | 0.0014  |
|               | 5        | C-H...O        | 2.41 | 0.0120 | 0.0384         | 0.0092 | -0.0088 | 0.0004  |
|               | 6        | C-H...F        | 2.45 | 0.0083 | 0.0351         | 0.0077 | -0.0065 | 0.0011  |
|               | 7        | p- $\pi$       | 3.20 | 0.0066 | 0.0230         | 0.0049 | -0.0040 | 0.0009  |
|               | 8        | p- $\pi$       | 3.21 | 0.0084 | 0.0246         | 0.0056 | -0.0050 | 0.0006  |
|               | 9        | $\pi$ - $\pi$  | 3.27 | 0.0073 | 0.0224         | 0.0046 | -0.0037 | 0.0010  |
|               | 10       | van der Waals  | 3.06 | 0.0097 | 0.0334         | 0.0077 | -0.0071 | 0.0006  |
| <b>TS2-II</b> | 1        | C...N          | 2.21 | 0.0513 | 0.0748         | 0.0265 | -0.0342 | -0.0078 |
|               | 2        | N-H...O        | 1.76 | 0.0392 | 0.1410         | 0.0374 | -0.0395 | -0.0021 |
|               | 3        | N-H...O        | 1.93 | 0.0259 | 0.0980         | 0.0227 | -0.0209 | 0.0018  |
|               | 4        | C-H...O        | 2.43 | 0.0134 | 0.0511         | 0.0108 | -0.0089 | 0.0019  |
|               | 5        | C-H...O        | 2.01 | 0.0230 | 0.0933         | 0.0208 | -0.0182 | 0.0026  |
|               | 6        | C-H...F        | 2.66 | 0.0051 | 0.0204         | 0.0040 | -0.0029 | 0.0011  |
|               | 7        | p- $\pi$       | 3.20 | 0.0063 | 0.0253         | 0.0049 | -0.0035 | 0.0014  |
|               | 8        | $\pi$ - $\pi$  | 3.29 | 0.0072 | 0.0215         | 0.0045 | -0.0036 | 0.0009  |
|               | 9        | $\pi$ - $\pi$  | 3.41 | 0.0070 | 0.0204         | 0.0043 | -0.0034 | 0.0008  |
|               | 10       | $\pi$ - $\pi$  | 3.20 | 0.0098 | 0.027          | 0.0060 | -0.0052 | 0.0008  |
| <b>IM3-II</b> | 1        | N-H...O        | 2.11 | 0.0197 | 0.0846         | 0.0183 | -0.0155 | 0.0028  |
|               | 2        | O-H...N        | 1.71 | 0.0528 | 0.0730         | 0.0329 | -0.0475 | -0.0146 |
|               | 3        | C-H...O        | 2.12 | 0.0183 | 0.0730         | 0.0155 | -0.0128 | 0.0027  |
|               | 4        | C-H...O        | 2.20 | 0.0143 | 0.0612         | 0.0125 | -0.0097 | 0.0028  |
|               | 5        | $\pi$ - $\pi$  | 3.39 | 0.0064 | 0.0192         | 0.0040 | -0.0031 | 0.0008  |
|               | 6        | $\pi$ - $\pi$  | 3.36 | 0.0066 | 0.0200         | 0.0041 | -0.0032 | 0.0009  |

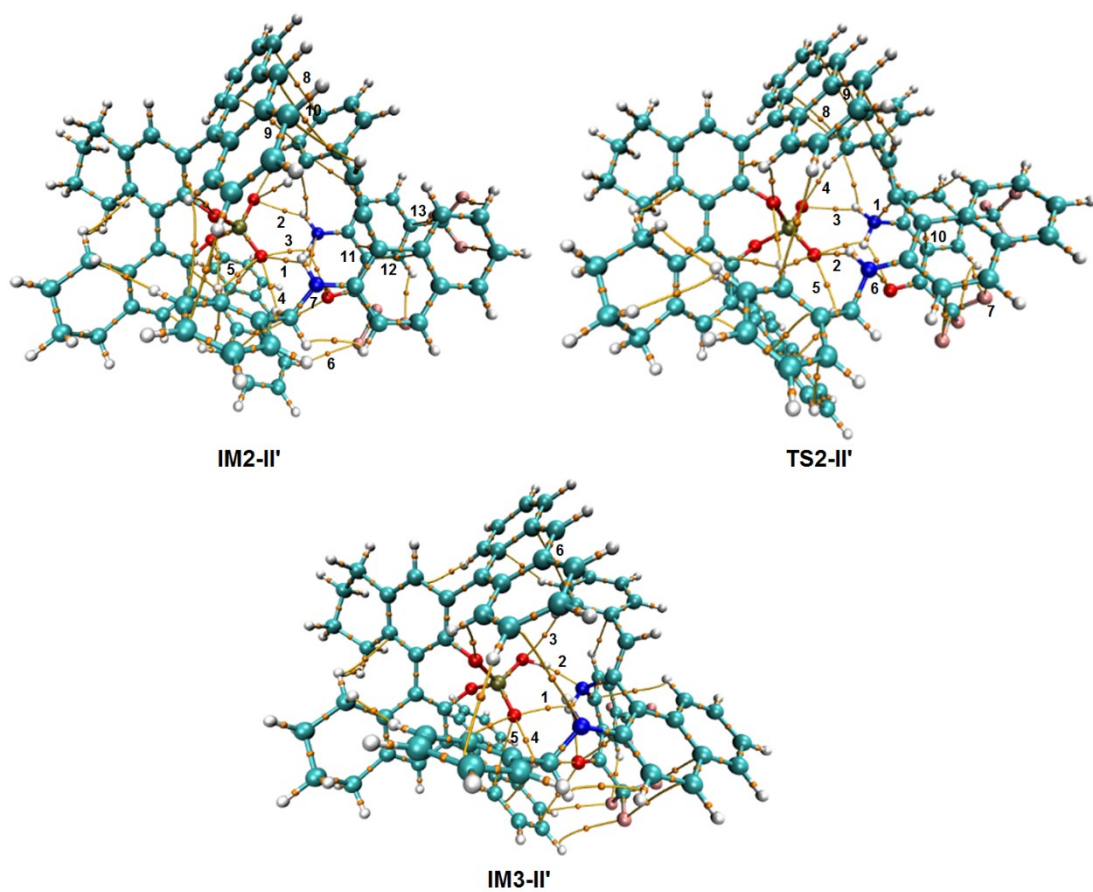

**Figure S7** QTAIM analyses of intermolecular interactions in **IM2-II'**, **TS2-II'** and **IM3-II'** in pathway **II'** and numbers of bond critical points (BCPs No.).

**Table S8** Numbers of bond critical points (BCPs No.) and the corresponding distances between atoms ( $d$ , in Å), classifications of the intermolecular interactions, electron density ( $\rho$ , in a.u.) and its Laplacian value ( $\nabla^2\rho$ , in a.u.), the electronic kinetic energy density ( $G$ , in a.u.), the electronic potential energy density ( $V$ , in a.u.) and the electronic energy density ( $H$ , in a.u.) at the BCPs of **IM2-II'**, **TS2-II'** and **IM3-II'** in pathway **II'**.

|                | BCPs No. | Classification | $d$  | $\rho$ | $\nabla^2\rho$ | $G$    | $V$     | $H$     |
|----------------|----------|----------------|------|--------|----------------|--------|---------|---------|
| <b>IM2-II'</b> | 1        | N-H...O        | 2.03 | 0.0226 | 0.0965         | 0.0214 | -0.0186 | 0.0027  |
|                | 2        | N-H...O        | 2.20 | 0.0152 | 0.0623         | 0.0127 | -0.0098 | 0.0029  |
|                | 3        | N-H...O        | 2.15 | 0.0189 | 0.0832         | 0.0180 | -0.0151 | 0.0028  |
|                | 4        | C-H...O        | 2.19 | 0.0183 | 0.0780         | 0.0169 | -0.0143 | 0.0026  |
|                | 5        | C-H...O        | 2.34 | 0.0137 | 0.0528         | 0.0111 | -0.0090 | 0.0021  |
|                | 6        | C-H...F        | 2.49 | 0.0066 | 0.0305         | 0.0059 | -0.0041 | 0.0017  |
|                | 7        | p- $\pi$       | 3.00 | 0.0092 | 0.0373         | 0.0076 | -0.0059 | 0.0017  |
|                | 8        | $\pi$ - $\pi$  | 3.38 | 0.0063 | 0.0185         | 0.0038 | -0.0030 | 0.0008  |
|                | 9        | $\pi$ - $\pi$  | 3.26 | 0.0076 | 0.0228         | 0.0048 | -0.0039 | 0.0009  |
|                | 10       | $\pi$ - $\pi$  | 3.38 | 0.0067 | 0.0196         | 0.0041 | -0.0033 | 0.0008  |
|                | 11       | $\pi$ - $\pi$  | 3.31 | 0.0064 | 0.0201         | 0.0042 | -0.0033 | 0.0008  |
|                | 12       | $\pi$ - $\pi$  | 3.39 | 0.0066 | 0.0194         | 0.0040 | -0.0032 | 0.0008  |
|                | 13       | $\pi$ - $\pi$  | 3.39 | 0.0071 | 0.0202         | 0.0042 | -0.0034 | 0.0008  |
| <b>TS2-II'</b> | 1        | C...N          | 2.22 | 0.0511 | 0.0751         | 0.0264 | -0.0341 | -0.0077 |
|                | 2        | N-H...O        | 1.74 | 0.0410 | 0.1453         | 0.0392 | -0.0420 | -0.0028 |
|                | 3        | N-H...O        | 2.19 | 0.0157 | 0.0642         | 0.0132 | -0.0104 | 0.0028  |
|                | 4        | C-H...O        | 2.04 | 0.0225 | 0.0910         | 0.0202 | -0.0176 | 0.0026  |
|                | 5        | C-H...O        | 2.35 | 0.0134 | 0.0572         | 0.0121 | -0.0099 | 0.0022  |
|                | 6        | p- $\pi$       | 2.79 | 0.0133 | 0.0542         | 0.0117 | -0.0099 | 0.0018  |
|                | 7        | p- $\pi$       | 2.91 | 0.0090 | 0.0394         | 0.0079 | -0.0059 | 0.0020  |
|                | 8        | $\pi$ - $\pi$  | 3.18 | 0.0083 | 0.0253         | 0.0054 | -0.0044 | 0.0009  |
|                | 9        | $\pi$ - $\pi$  | 3.36 | 0.0067 | 0.0198         | 0.0041 | -0.0033 | 0.0008  |
|                | 10       | $\pi$ - $\pi$  | 3.25 | 0.0088 | 0.0262         | 0.0057 | -0.0048 | 0.0009  |
| <b>IM3-II'</b> | 1        | N-H...O        | 2.10 | 0.0193 | 0.0828         | 0.0178 | -0.0148 | 0.0029  |
|                | 2        | O-H...N        | 1.73 | 0.0507 | 0.0796         | 0.0326 | -0.0453 | -0.0127 |
|                | 3        | C-H...O        | 2.41 | 0.0124 | 0.0523         | 0.0107 | -0.0084 | 0.0023  |
|                | 4        | C-H...O        | 2.22 | 0.0151 | 0.0636         | 0.0133 | -0.0108 | 0.0026  |
|                | 5        | p- $\pi$       | 3.13 | 0.0068 | 0.0265         | 0.0053 | -0.0040 | 0.0013  |
|                | 6        | $\pi$ - $\pi$  | 3.27 | 0.0073 | 0.0238         | 0.0050 | -0.0040 | 0.0010  |



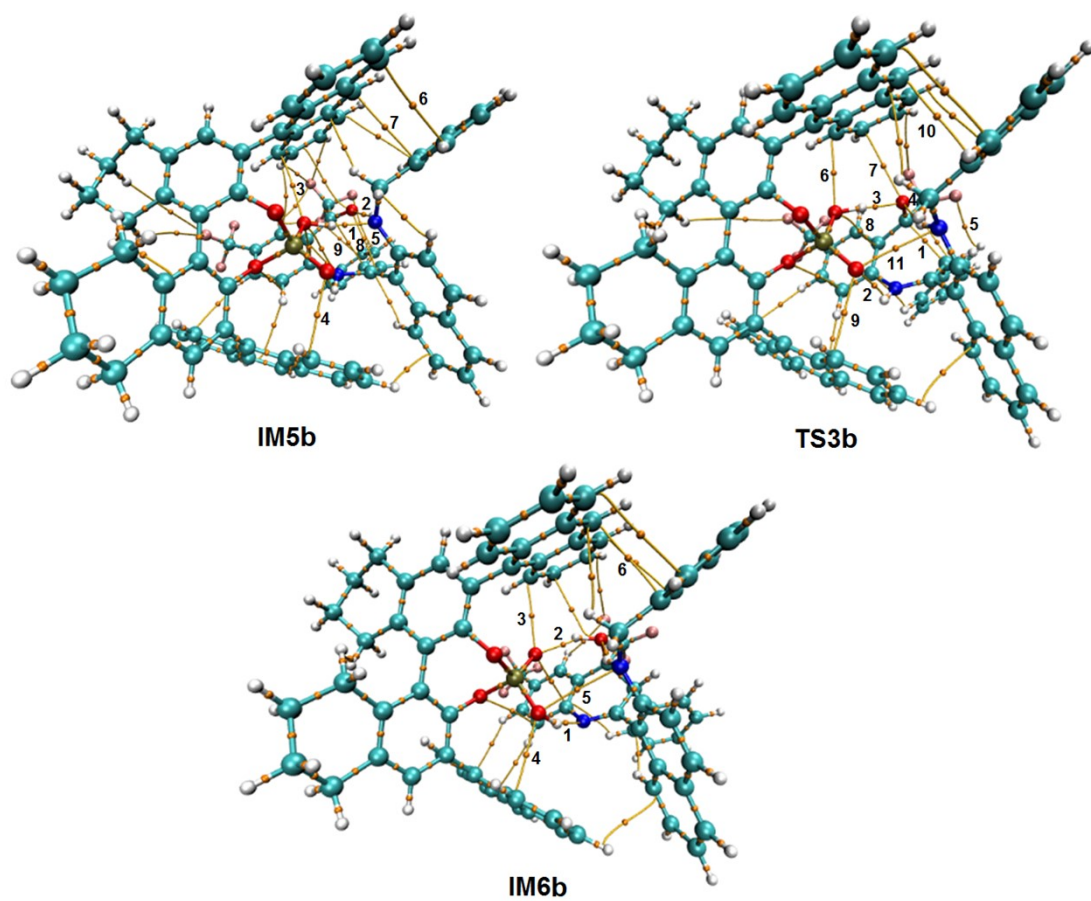

**Figure S8** QTAIM analyses of intermolecular interactions in **IM5b**, **TS3b** and **IM6b** in annulation processes by **IM4b** and numbers of bond critical points (BCPs No.).

**Table S9** Numbers of bond critical points (BCPs No.) and the corresponding distances between atoms ( $d$ , in Å), classifications of the intermolecular interactions, electron density ( $\rho$ , in a.u.) and its Laplacian value ( $\nabla^2\rho$ , in a.u.), the electronic kinetic energy density ( $G$ , in a.u.), the electronic potential energy density ( $V$ , in a.u.) and the electronic energy density ( $H$ , in a.u.) at the BCPs of **IM5b**, **TS3b** and **IM6b** in annulation processes by **IM4b**.

|             | BCPs No. | Classification | $d$  | $\rho$ | $\nabla^2\rho$ | $G$    | $V$     | $H$     |
|-------------|----------|----------------|------|--------|----------------|--------|---------|---------|
| <b>IM5b</b> | 1        | O-H...N        | 1.61 | 0.0685 | 0.0715         | 0.0426 | -0.0672 | -0.0247 |
|             | 2        | N-H...O        | 1.98 | 0.0217 | 0.0945         | 0.0204 | -0.0172 | 0.0032  |
|             | 3        | p- $\pi$       | 3.13 | 0.0068 | 0.0258         | 0.0052 | -0.0039 | 0.0013  |
|             | 4        | p- $\pi$       | 2.86 | 0.0116 | 0.0464         | 0.0097 | -0.0078 | 0.0019  |
|             | 5        | p- $\pi$       | 3.11 | 0.0064 | 0.0245         | 0.0049 | -0.0036 | 0.0013  |
|             | 6        | $\pi$ - $\pi$  | 3.46 | 0.0051 | 0.0157         | 0.0032 | -0.0024 | 0.0007  |
|             | 7        | $\pi$ - $\pi$  | 3.26 | 0.0071 | 0.0213         | 0.0046 | -0.0038 | 0.0008  |
|             | 8        | $\pi$ - $\pi$  | 3.61 | 0.0042 | 0.0139         | 0.0027 | -0.0019 | 0.0008  |
|             | 9        | $\pi$ - $\pi$  | 2.99 | 0.0099 | 0.0336         | 0.0073 | -0.0062 | 0.0011  |
| <b>TS3b</b> | 1        | C...C          | 2.30 | 0.0499 | 0.0448         | 0.0184 | -0.0256 | -0.0072 |
|             | 2        | N-H...O        | 2.05 | 0.0212 | 0.0907         | 0.0198 | -0.0169 | 0.0029  |
|             | 3        | O-H...O        | 1.64 | 0.0522 | 0.1204         | 0.0431 | -0.0562 | -0.0131 |
|             | 4        | N-H...O        | 1.86 | 0.0292 | 0.1204         | 0.0284 | -0.0268 | 0.0017  |
|             | 5        | C-H...F        | 2.61 | 0.0068 | 0.0295         | 0.0058 | -0.0042 | 0.0016  |
|             | 6        | p- $\pi$       | 2.90 | 0.0105 | 0.0422         | 0.0088 | -0.0070 | 0.0018  |
|             | 7        | p- $\pi$       | 3.22 | 0.0063 | 0.0222         | 0.0045 | -0.0034 | 0.0011  |
|             | 8        | p- $\pi$       | 3.06 | 0.0098 | 0.0392         | 0.0081 | -0.0064 | 0.0017  |
|             | 9        | p- $\pi$       | 2.90 | 0.0109 | 0.0424         | 0.0089 | -0.0071 | 0.0017  |
|             | 10       | $\pi$ - $\pi$  | 3.19 | 0.0081 | 0.0246         | 0.0053 | -0.0044 | 0.0009  |
|             | 11       | van der Waals  | 2.95 | 0.0106 | 0.0436         | 0.0091 | -0.0072 | 0.0018  |
| <b>IM6b</b> | 1        | O-H...N        | 1.78 | 0.0427 | 0.0905         | 0.0299 | -0.0373 | -0.0073 |
|             | 2        | O-H...O        | 1.84 | 0.0292 | 0.1204         | 0.0288 | -0.0275 | 0.0013  |
|             | 3        | p- $\pi$       | 2.93 | 0.0101 | 0.0392         | 0.0081 | -0.0065 | 0.0016  |
|             | 4        | p- $\pi$       | 2.84 | 0.0112 | 0.0444         | 0.0093 | -0.0075 | 0.0018  |
|             | 5        | $\pi$ - $\pi$  | 3.09 | 0.0084 | 0.0325         | 0.0066 | -0.0050 | 0.0016  |
|             | 6        | $\pi$ - $\pi$  | 3.16 | 0.0085 | 0.0258         | 0.0056 | -0.0047 | 0.0009  |

### 3. Reaction mechanisms for pathways III, III', IV, IV' and QTAIM Analyses

With respect to pathway **III** or **III'** (Figures 4, 9 and 10), it is the reaction process starting from the interaction between **R2** and **IM1B** containing (*S*)-**H-VQM**, leading to the major product **P**. Initially, **R2** interacts with **IM1B** through dual hydrogen bonds (i.e. N5-H5...O2 and N1-H1...O3) and forms the possible intermediate **IM2-III** or **IM2-III'** with an energy release of 0.7 kcal/mol or 1.4 kcal/mol (Figure 9). In **IM2-III** (or **IM2-III'**), the H5...O2 and H1...O3 distances are 1.63 and 1.82 Å (or 1.55 and 1.83 Å), respectively (Figures 10, S9 and S10, Tables S10 and S11). The distance between the reaction sites involving the N1 and C2 atoms in **IM2-III** (or **IM2-III'**) is 3.71 Å (or 3.48 Å) (Figures 10, S9 and S10, Tables S10 and S11). After going through the transition state **TS2-III** (or **TS2-III'**) and overcoming an energy barrier of 16.8 kcal/mol (or 13.6 kcal/mol), the N1-C2 bond forms in the intermediate **IM3-III** (or **IM3-III'**) (Figure 9). In **TS2-III** (or **TS2-III'**), the distance between N1 and C2 atoms is 2.21 Å (or 2.17 Å), and the N5-H5...O2 hydrogen bond retains in which the H5...O2 distances is 1.73 Å (or 1.69 Å). But the N1-H1...O3 hydrogen bond in **TS2-III** (or **TS2-III'**) varies in which the H1 atom transfers towards O3 atom and forms N1...H1...O3 interactions with N1...H1 and H1...O3 distances of 1.05 and 1.64 Å (or 1.04 and 1.74 Å), respectively (Figures 10, S9 and S10, Tables S10 and S11). Then the N1-C2 bond in **IM3-III** (or **IM3-III'**), and also the new O3-H1...N1 hydrogen bond with the H1...N1 distance of 1.58 Å (or 1.76 Å) forms which coexists with the N5-H5...O2 hydrogen bond (Figures 10, S9 and S10, Tables S10 and S11). Then the recovered catalyst **C1** separates from **IM3-III** (or **IM3-III'**) and the same intermediate **IM4c** is produced

(Figure 9). Due to the proton-donating and accepting characters of the recovered catalyst **C1**, it reconnects with **IM4c** by forming the new dual hydrogen bonding mode (i.e., N1-H1'...O2 and O3-H1...O5 hydrogen bonds) to generate **IM5c**. Afterwards, the hydrogen transfers (i.e., the transfer of H1' atom to O2 atom and the transfer of H1 atom to O5 atom) together with the C1-C4 annulation reaction take place in the transition state **TS3c** (Figures 10 and S11, Table S12). In **TS3c**, the distance between reaction sites of C1 and C4 atoms is 2.28 Å, and the O2...H1', H1'...N1, O3...H1 and H1...O5 distances are 2.12 Å, 1.02 Å, 1.00 Å and 1.65 Å, respectively (Figures 10 and S11, Table S12). The energy barrier for the process from **IM5c** to **TS3c** is 10.0 kcal/mol. After the completion of the hydrogen transfers and C1-C4 annulation reaction, **IM6c** is generated, and the process from **TS3c** to **IM6c** releases an energy of 37.6 kcal/mol (Figure 9). In **IM6c**, two new hydrogen bonds (i.e., O2-H1'...N1 and O5-H1...O3 hydrogen bonds) form and the catalyst **C1** recovers. Subsequently, the O2-H1'...N1 and O5-H1...O3 hydrogen bonds break and give out **IM7c** which needs an energy of 3.3 kcal/mol. After going through an intramolecular dehydration elimination reaction of **IM7c**, the major product **P** is yielded with an energy release of 16.5 kcal/mol (Figure 9). The enantioselectivity-determining step in pathway **III** (or **III'**) is the N1-C2 bonding process from **IM2-III** to **TS2-III** (or from **IM2-III'** to **TS2-III'**) with energy barrier of 16.8 kcal/mol (or 13.6 kcal/mol).

For pathways **IV** and **IV'**, their Gibbs free energy profiles are shown in Figure 11, and the optimized geometries of the intermediates, transition states and the product involving in these two pathways are displayed in Figure 12. The reaction process starts

from the dual hydrogen bonding interaction (i.e., N5-H5 $\cdots$ O2 and N1-H1 $\cdots$ O3 hydrogen bonds) of **R2** with **IM1B**, and two possible complexes **IM2-IV** and **IM2-IV'** form which release an energy of 0.3 and 0.9 kcal/mol, respectively (Figure 11). The H5 $\cdots$ O2 and H1 $\cdots$ O3 distances are 1.66 and 1.90 Å in **IM2-IV** (or 1.69 and 1.87 Å in **IM2-IV'**), and the C2 $\cdots$ N1 distance is 3.65 Å in **IM2-IV** (or 4.00 Å in **IM2-IV'**) (Figures 12, S12, S13, Tables S13 and S14). The C2-N1 bonding process goes through the transition state **TS2-IV** (or **TS2-IV'**) which needs to overcome an energy barrier of 11.2 kcal/mol (or 13.3 kcal/mol), and the C2-N1 bond forms in **IM3-IV** (or **IM3-IV'**) which is accompanied by the transfer of H1 atom to O3 atom (Figure 11). In **TS2-IV** (or **TS2-IV'**), the C2 $\cdots$ N1 distance is shortened to 2.23 Å (or 2.25 Å), while the H1 $\cdots$ O3 and H1 $\cdots$ N1 distances 1.72 are 1.03 Å (or 1.62 and 1.05 Å), respectively (Figures 12, S12, S13, Tables S13 and S14). A new hydrogen bond (i.e., O3-H1 $\cdots$ N1 hydrogen bond) forms in **IM3-IV** (or **IM3-IV'**) which coexists with the N5-H5 $\cdots$ O2 hydrogen bond, so the catalyst recovers. Then the recovered catalyst **C1** breaks away from **IM3-IV** (or **IM3-IV'**) by disconnecting the dual hydrogen bonding interaction (i.e., the N5-H5 $\cdots$ O2 and O3-H1 $\cdots$ N1 hydrogen bonds), leading to the intermediate **IM4d**. Subsequently, the resultant **IM4d** reconnects with the catalyst **C1** via two new hydrogen bonds (i.e., N1-H1' $\cdots$ O2 and O3-H1 $\cdots$ O5 hydrogen bonds) and forms the intermediate **IM5d** in which the H1' $\cdots$ O2 and H1 $\cdots$ O5 distances are 2.19 and 1.81 Å, respectively (Figures 12 and S14, Table S15). The annulation reaction between C1 and C4 atoms occurs in **TS3d** which is accompanied by the double proton transfer (i.e., the transfer of H1 atom to O5 atom and the transfer of H1' atom to O2 atom). After

overcoming an energy barrier of 7.2 kcal/mol, the intermediate **IM6d** is generated (Figure 11). In **TS3d**, the C1...C4 distance is shortened to 2.19 Å, while the C1-C4 bond forms in **IM6d** (Figures 12 and S14, Table S15). The double proton transfer leads to the formations of two new hydrogen bonds (i.e., O2-H1'...N1 and O5-H1...O3 hydrogen bonds) in **IM6d** which makes the catalyst **C1** recover. After the broken of O2-H1'...N1 and O5-H1...O3 hydrogen bonds, **IM7d** breaks away from **IM6d** and then undergoes an intramolecular dehydration reaction which gives out the minor product **mP** (Figure 11). The enantioselectivity of pathway **IV** (or **IV'**) is determined by the step involving the N1-C2 bonding process with an energy barrier of 11.2 kcal/mol (or 13.3 kcal/mol).

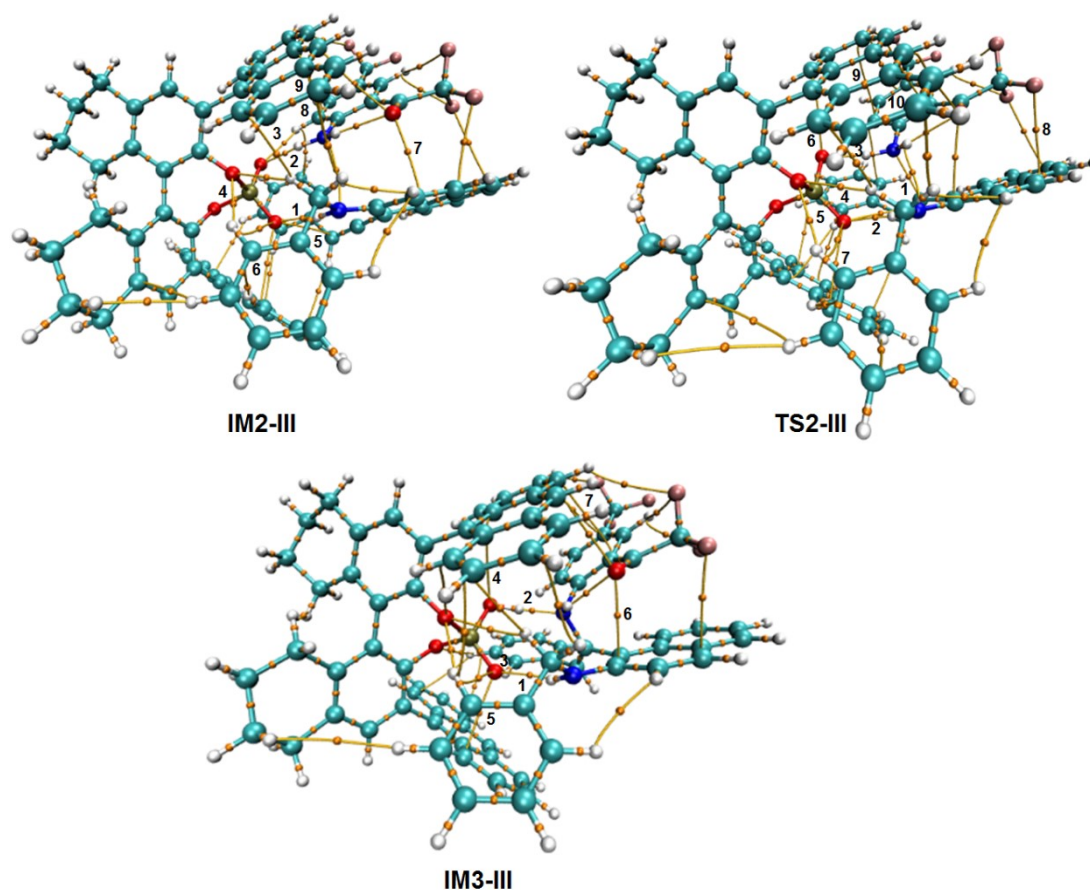

**Figure S9** QTAIM analyses of intermolecular interactions in **IM2-III**, **TS2-III** and **IM3-III** in pathway **III** and numbers of bond critical points (BCPs No.).

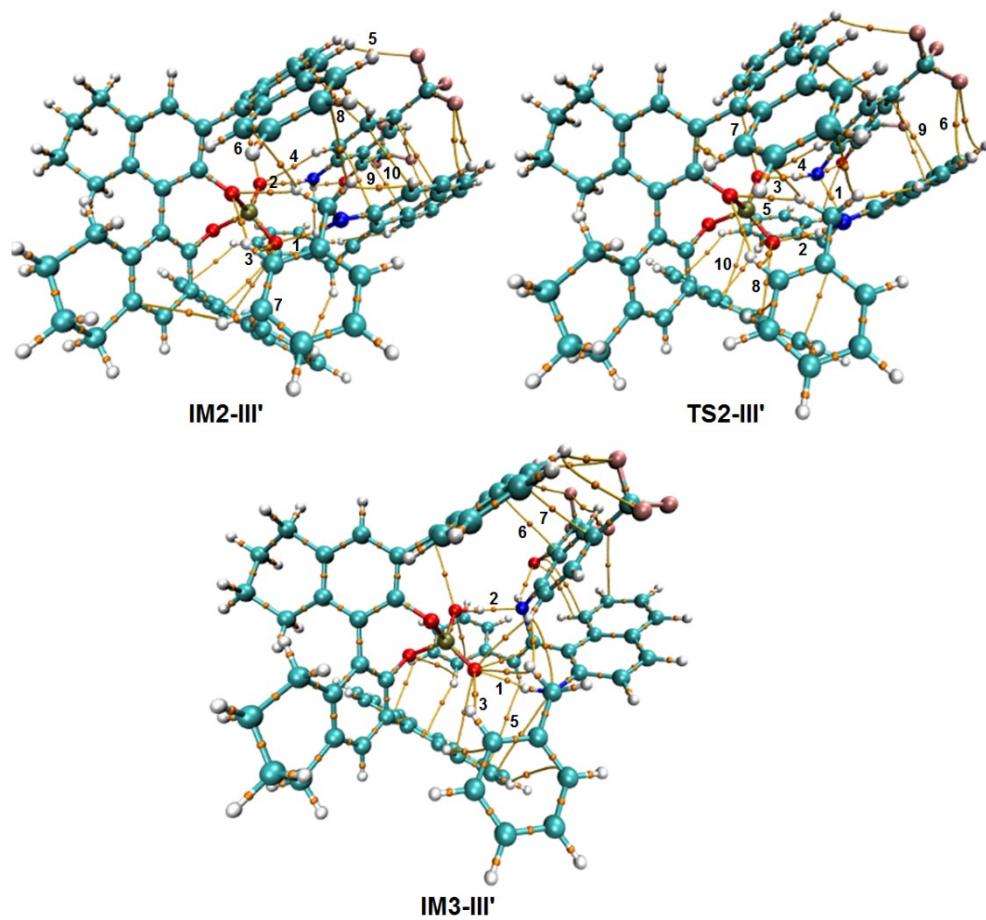

**Figure S10** QTAIM analyses of intermolecular interactions in **IM2-III'**, **TS2-III'** and **IM3-III'** in pathway **III'** and numbers of bond critical points (BCPs No.).

**Table S10** Numbers of bond critical points (BCPs No.) and the corresponding distances between atoms ( $d$ , in Å), classifications of the intermolecular interactions, electron density ( $\rho$ , in a.u.) and its Laplacian value ( $\nabla^2\rho$ , in a.u.), the electronic kinetic energy density ( $G$ , in a.u.), the electronic potential energy density ( $V$ , in a.u.) and the electronic energy density ( $H$ , in a.u.) at the BCPs of **IM2-III**, **TS2-III** and **IM3-III** in pathway **III**.

|                | BCPs No. | Classification | $d$  | $\rho$ | $\nabla^2\rho$ | $G$    | $V$     | $H$     |
|----------------|----------|----------------|------|--------|----------------|--------|---------|---------|
| <b>IM2-III</b> | 1        | N-H...O        | 1.63 | 0.0528 | 0.1448         | 0.0467 | -0.0571 | -0.0105 |
|                | 2        | N-H...O        | 1.82 | 0.0347 | 0.1218         | 0.0315 | -0.0325 | -0.0010 |
|                | 3        | C-H...O        | 2.38 | 0.0105 | 0.0421         | 0.0085 | -0.0065 | 0.0020  |
|                | 4        | C-H...O        | 2.33 | 0.0120 | 0.0465         | 0.0094 | -0.0073 | 0.0022  |
|                | 5        | p- $\pi$       | 2.98 | 0.0099 | 0.0363         | 0.0076 | -0.0061 | 0.0015  |
|                | 6        | p- $\pi$       | 3.04 | 0.0081 | 0.0315         | 0.0064 | -0.0049 | 0.0015  |
|                | 7        | p- $\pi$       | 2.89 | 0.0114 | 0.0424         | 0.0089 | -0.0073 | 0.0017  |
|                | 8        | p- $\pi$       | 3.27 | 0.0080 | 0.0277         | 0.0057 | -0.0046 | 0.0012  |
|                | 9        | $\pi$ - $\pi$  | 3.43 | 0.0071 | 0.0212         | 0.0044 | -0.0035 | 0.0009  |
| <b>TS2-III</b> | 1        | C...N          | 2.21 | 0.0517 | 0.0788         | 0.0274 | -0.0352 | -0.0077 |
|                | 2        | N-H...O        | 1.73 | 0.0409 | 0.1388         | 0.038  | -0.0414 | -0.0034 |
|                | 3        | N-H...O        | 1.64 | 0.0535 | 0.1408         | 0.0466 | -0.0580 | -0.0114 |
|                | 4        | C-H...O        | 2.41 | 0.0100 | 0.0380         | 0.0077 | -0.0059 | 0.0018  |
|                | 5        | C-H...O        | 2.44 | 0.0092 | 0.0347         | 0.0070 | -0.0052 | 0.0017  |
|                | 6        | p- $\pi$       | 3.10 | 0.0073 | 0.0278         | 0.0056 | -0.0043 | 0.0013  |
|                | 7        | p- $\pi$       | 2.99 | 0.0090 | 0.0340         | 0.0070 | -0.0055 | 0.0015  |
|                | 8        | p- $\pi$       | 3.18 | 0.0064 | 0.0252         | 0.0049 | -0.0035 | 0.0014  |
|                | 9        | $\pi$ - $\pi$  | 3.43 | 0.0064 | 0.0193         | 0.0040 | -0.0031 | 0.0009  |
|                | 10       | $\pi$ - $\pi$  | 3.3  | 0.0074 | 0.0211         | 0.0045 | -0.0037 | 0.0008  |
| <b>IM3-III</b> | 1        | N-H...O        | 1.94 | 0.0247 | 0.1076         | 0.0241 | -0.0213 | 0.0028  |
|                | 2        | O-H...N        | 1.58 | 0.2851 | -1.0126        | 0.0369 | -0.3270 | -0.2901 |
|                | 3        | C-H...O        | 2.37 | 0.0128 | 0.0475         | 0.0098 | -0.0076 | 0.0021  |
|                | 4        | p- $\pi$       | 3.35 | 0.0056 | 0.0203         | 0.0040 | -0.0029 | 0.0011  |
|                | 5        | p- $\pi$       | 2.94 | 0.0097 | 0.0374         | 0.0078 | -0.0062 | 0.0016  |
|                | 6        | p- $\pi$       | 2.89 | 0.0119 | 0.0442         | 0.0096 | -0.0082 | 0.0014  |
|                | 7        | $\pi$ - $\pi$  | 3.32 | 0.0071 | 0.0208         | 0.0044 | -0.0035 | 0.0008  |



**Table S11** Numbers of bond critical points (BCPs No.) and the corresponding distances between atoms ( $d$ , in Å), classifications of the intermolecular interactions, electron density ( $\rho$ , in a.u.) and its Laplacian value ( $\nabla^2\rho$ , in a.u.), the electronic kinetic energy density ( $G$ , in a.u.), the electronic potential energy density ( $V$ , in a.u.) and the electronic energy density ( $H$ , in a.u.) at the BCPs of **IM2-III'**, **TS2-III'** and **IM3-III'** in pathway **III'**.

|                 | BCPs No. | Classification | $d$  | $\rho$ | $\nabla^2\rho$ | $G$    | $V$     | $H$     |
|-----------------|----------|----------------|------|--------|----------------|--------|---------|---------|
| <b>IM2-III'</b> | 1        | N-H...O        | 1.55 | 0.0668 | 0.1469         | 0.0565 | -0.0764 | -0.0198 |
|                 | 2        | N-H...O        | 1.83 | 0.0306 | 0.1192         | 0.0288 | -0.0279 | 0.0010  |
|                 | 3        | C-H...O        | 2.89 | 0.0062 | 0.0225         | 0.0045 | -0.0034 | 0.0011  |
|                 | 4        | C-H...O        | 2.51 | 0.0091 | 0.0330         | 0.0067 | -0.0051 | 0.0016  |
|                 | 5        | C-H...F        | 2.91 | 0.0029 | 0.0116         | 0.0022 | -0.0015 | 0.0007  |
|                 | 6        | p- $\pi$       | 3.30 | 0.0052 | 0.0195         | 0.0038 | -0.0028 | 0.0011  |
|                 | 7        | p- $\pi$       | 2.97 | 0.0090 | 0.0352         | 0.0072 | -0.0057 | 0.0016  |
|                 | 8        | $\pi$ - $\pi$  | 3.27 | 0.0073 | 0.0234         | 0.0049 | -0.0040 | 0.0009  |
|                 | 9        | $\pi$ - $\pi$  | 3.23 | 0.0073 | 0.0219         | 0.0047 | -0.0038 | 0.0008  |
|                 | 10       | $\pi$ - $\pi$  | 3.37 | 0.0066 | 0.0192         | 0.0040 | -0.0032 | 0.0008  |
| <b>TS2-III'</b> | 1        | C...N          | 2.17 | 0.0563 | 0.0761         | 0.0287 | -0.0383 | -0.0097 |
|                 | 2        | N-H...O        | 1.69 | 0.0466 | 0.1459         | 0.0429 | -0.0492 | -0.0064 |
|                 | 3        | N-H...O        | 1.74 | 0.0389 | 0.1290         | 0.0351 | -0.038  | -0.0029 |
|                 | 4        | C-H...O        | 2.60 | 0.0080 | 0.0287         | 0.0058 | -0.0044 | 0.0014  |
|                 | 5        | C-H...O        | 2.38 | 0.0108 | 0.0417         | 0.0085 | -0.0065 | 0.0019  |
|                 | 6        | C-H...F        | 2.70 | 0.0059 | 0.0258         | 0.0050 | -0.0035 | 0.0015  |
|                 | 7        | p- $\pi$       | 3.48 | 0.0038 | 0.0137         | 0.0026 | -0.0018 | 0.0008  |
|                 | 8        | p- $\pi$       | 2.84 | 0.0113 | 0.0459         | 0.0096 | -0.0077 | 0.0019  |
|                 | 9        | $\pi$ - $\pi$  | 3.45 | 0.0060 | 0.0177         | 0.0036 | -0.0028 | 0.0008  |
|                 | 10       | $\pi$ - $\pi$  | 3.27 | 0.0073 | 0.0243         | 0.0051 | -0.0041 | 0.0010  |
| <b>IM3-III'</b> | 1        | N-H...O        | 1.96 | 0.2622 | -0.6891        | 0.0655 | -0.3033 | -0.2378 |
|                 | 2        | O-H...N        | 1.76 | 0.0456 | 0.0794         | 0.0300 | -0.0401 | -0.0101 |
|                 | 3        | C-H...O        | 2.73 | 0.0063 | 0.0234         | 0.0047 | -0.0035 | 0.0012  |
|                 | 4        | p- $\pi$       | 3.29 | 0.0073 | 0.0237         | 0.0048 | -0.0038 | 0.0011  |
|                 | 5        | p- $\pi$       | 3.69 | 0.0033 | 0.0102         | 0.0020 | -0.0014 | 0.0006  |
|                 | 6        | $\pi$ - $\pi$  | 3.33 | 0.0067 | 0.0194         | 0.0041 | -0.0033 | 0.0008  |
|                 | 7        | $\pi$ - $\pi$  | 3.25 | 0.0079 | 0.0236         | 0.0050 | -0.0042 | 0.0008  |

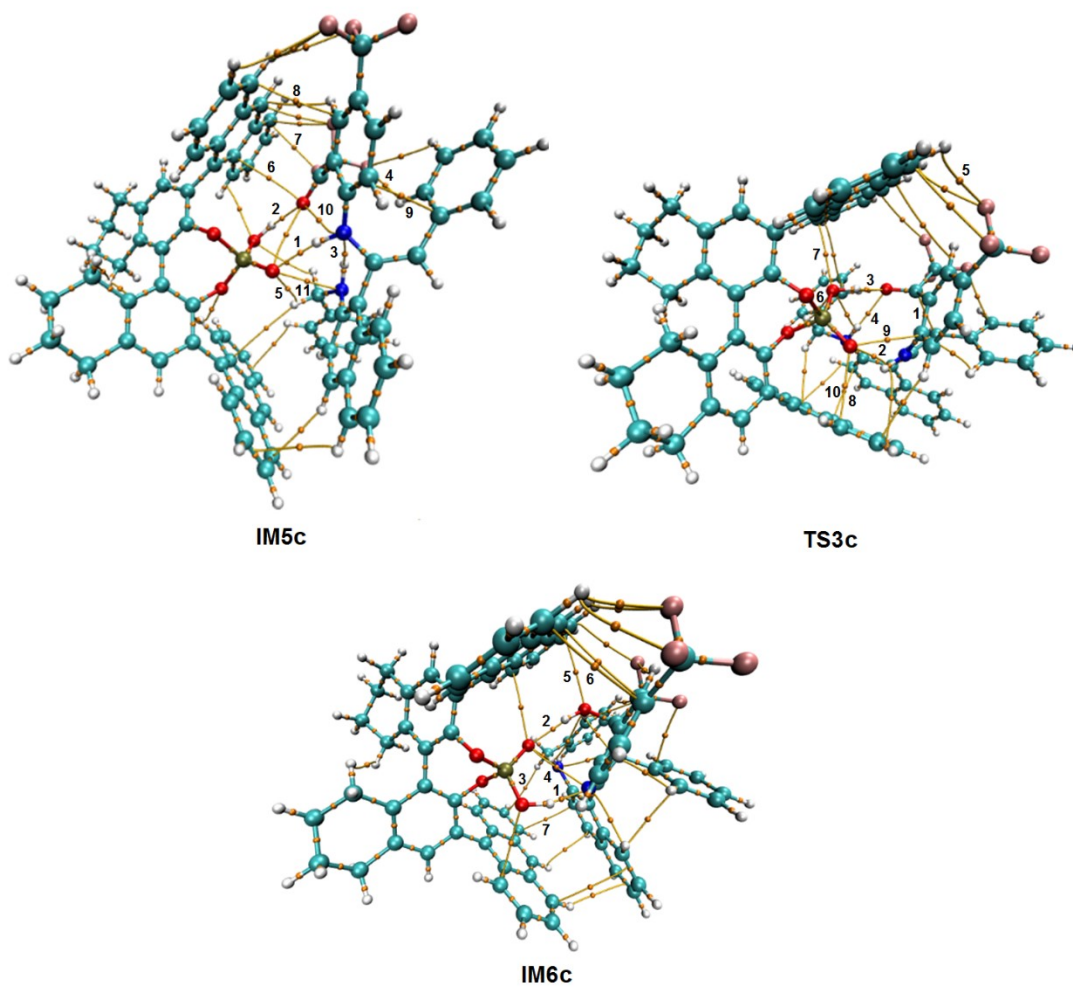

**Figure S11** QTAIM analyses of intermolecular interactions in **IM5c**, **TS3c** and **IM6c** in annulation processes by **IM4c** and numbers of bond critical points (BCPs No.).

**Table S12** Numbers of bond critical points (BCPs No.) and the corresponding distances between atoms ( $d$ , in Å), classifications of the intermolecular interactions, electron density ( $\rho$ , in a.u.) and its Laplacian value ( $\nabla^2\rho$ , in a.u.), the electronic kinetic energy density ( $G$ , in a.u.), the electronic potential energy density ( $V$ , in a.u.) and the electronic energy density ( $H$ , in a.u.) at the BCPs of **IM5c**, **TS3c** and **IM6c** in annulation processes by **IM4c**.

|             | BCPs No. | Classification | $d$  | $\rho$ | $\nabla^2\rho$ | $G$    | $V$     | $H$     |
|-------------|----------|----------------|------|--------|----------------|--------|---------|---------|
| <b>IM5c</b> | 1        | N-H...O        | 1.97 | 0.0227 | 0.0711         | 0.018  | -0.0183 | -0.0003 |
|             | 2        | O-H...O        | 1.81 | 0.0298 | 0.1139         | 0.0265 | -0.0246 | 0.0019  |
|             | 3        | N-H...N        | 2.32 | 0.0146 | 0.0533         | 0.0120 | -0.0108 | 0.0013  |
|             | 4        | C-H...F        | 2.43 | 0.0090 | 0.0392         | 0.0085 | -0.0071 | 0.0013  |
|             | 5        | C-H...O        | 2.60 | 0.0098 | 0.0373         | 0.0080 | -0.0067 | 0.0013  |
|             | 6        | p- $\pi$       | 3.63 | 0.0031 | 0.0117         | 0.0023 | -0.0017 | 0.0006  |
|             | 7        | p- $\pi$       | 3.00 | 0.0086 | 0.0342         | 0.0073 | -0.0061 | 0.0012  |
|             | 8        | $\pi$ - $\pi$  | 3.18 | 0.0078 | 0.0250         | 0.0051 | -0.0039 | 0.0011  |
|             | 9        | $\pi$ - $\pi$  | 2.98 | 0.0115 | 0.0398         | 0.0082 | -0.0064 | 0.0017  |
|             | 10       | van der Waals  | 2.74 | 0.0162 | 0.0659         | 0.0144 | -0.0124 | 0.0021  |
|             | 11       | van der Waals  | 2.97 | 0.0109 | 0.0373         | 0.0089 | -0.0085 | 0.0004  |
| <b>TS3c</b> | 1        | C...C          | 2.28 | 0.0523 | 0.0448         | 0.0192 | -0.0273 | -0.0080 |
|             | 2        | N-H...O        | 2.12 | 0.0189 | 0.0864         | 0.0185 | -0.0153 | 0.0031  |
|             | 3        | O-H...O        | 1.65 | 0.0497 | 0.1251         | 0.0422 | -0.0530 | -0.0109 |
|             | 4        | N-H...O        | 2.08 | 0.0190 | 0.0794         | 0.0170 | -0.0142 | 0.0028  |
|             | 5        | C-H...F        | 2.51 | 0.0082 | 0.0357         | 0.0070 | -0.0052 | 0.0019  |
|             | 6        | C-H...O        | 2.41 | 0.0101 | 0.0404         | 0.0083 | -0.0064 | 0.0019  |
|             | 7        | p- $\pi$       | 2.97 | 0.0091 | 0.0349         | 0.0072 | -0.0057 | 0.0015  |
|             | 8        | p- $\pi$       | 2.88 | 0.0108 | 0.0422         | 0.0089 | -0.0072 | 0.0017  |
|             | 9        | p- $\pi$       | 2.77 | 0.0143 | 0.0577         | 0.0125 | -0.0106 | 0.0019  |
|             | 10       | $\pi$ - $\pi$  | 3.24 | 0.0083 | 0.0255         | 0.0055 | -0.0046 | 0.0009  |
| <b>IM6c</b> | 1        | O-H...N        | 1.56 | 0.0748 | 0.0745         | 0.0469 | -0.0752 | -0.0283 |
|             | 2        | O-H...O        | 1.81 | 0.0301 | 0.1199         | 0.0293 | -0.0286 | 0.0007  |
|             | 3        | N-H...O        | 1.91 | 0.0260 | 0.1052         | 0.0241 | -0.0220 | 0.0022  |
|             | 4        | p-p            | 2.99 | 0.0109 | 0.0438         | 0.0092 | -0.0075 | 0.0017  |
|             | 5        | p- $\pi$       | 3.20 | 0.0072 | 0.0264         | 0.0053 | -0.0041 | 0.0013  |
|             | 6        | $\pi$ - $\pi$  | 3.50 | 0.0050 | 0.0150         | 0.0031 | -0.0024 | 0.0007  |
|             | 7        | $\pi$ - $\pi$  | 3.40 | 0.0056 | 0.0169         | 0.0035 | -0.0027 | 0.0007  |

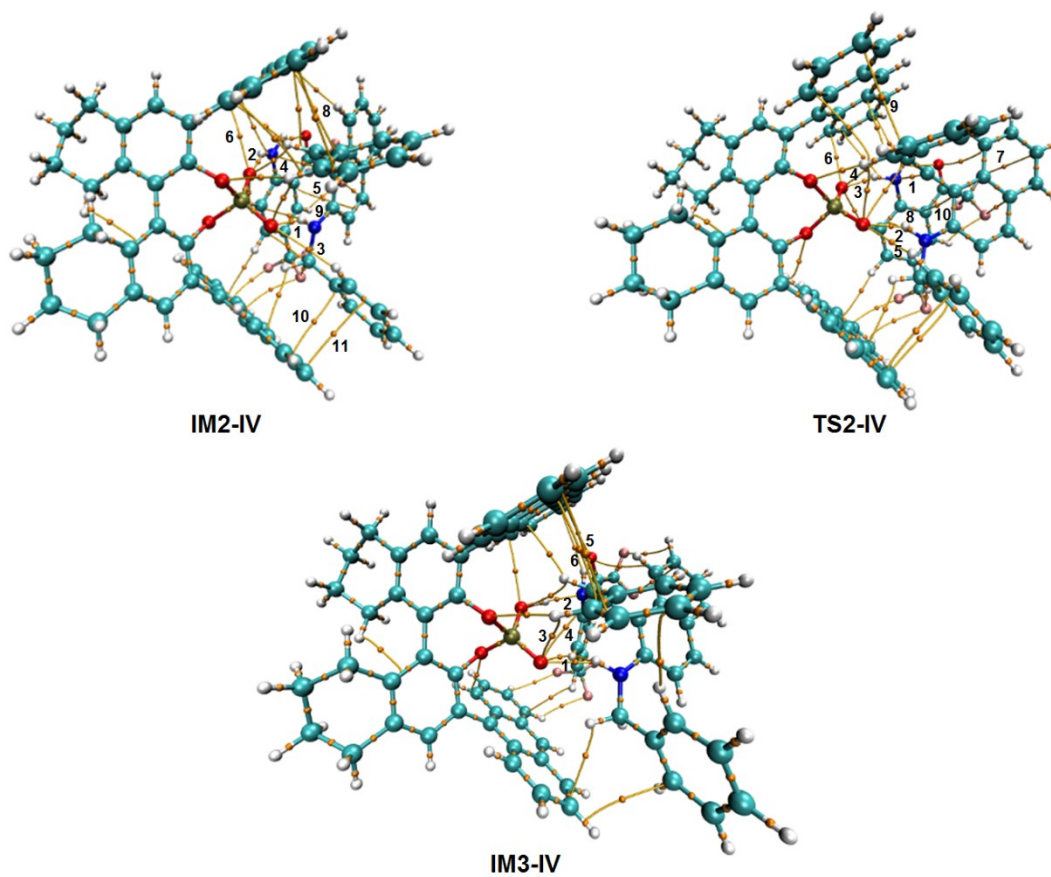

**Figure S12** QTAIM analyses of intermolecular interactions in **IM2-IV**, **TS2-IV** and **IM3-IV** in pathway **IV** and numbers of bond critical points (BCPs No.).

**Table S13** Numbers of bond critical points (BCPs No.) and the corresponding distances between atoms ( $d$ , in Å), classifications of the intermolecular interactions, electron density ( $\rho$ , in a.u.) and its Laplacian value ( $\nabla^2\rho$ , in a.u.), the electronic kinetic energy density ( $G$ , in a.u.), the electronic potential energy density ( $V$ , in a.u.) and the electronic energy density ( $H$ , in a.u.) at the BCPs of **IM2-IV**, **TS2-IV** and **IM3-IV** in pathway **IV**.

|               | BCPs No.      | Classification | $d$    | $\rho$ | $\nabla^2\rho$ | $G$     | $V$     | $H$     |
|---------------|---------------|----------------|--------|--------|----------------|---------|---------|---------|
| <b>IM2-IV</b> | 1             | N-H...O        | 1.66   | 0.0513 | 0.1387         | 0.0447  | -0.0547 | -0.0100 |
|               | 2             | N-H...O        | 1.90   | 0.0250 | 0.1094         | 0.0245  | -0.0216 | 0.0029  |
|               | 3             | C-H...O        | 2.76   | 0.0049 | 0.0188         | 0.0037  | -0.0027 | 0.0010  |
|               | 4             | C-H...O        | 2.27   | 0.0155 | 0.0604         | 0.0128  | -0.0105 | 0.0023  |
|               | 5             | C-H...F        | 2.25   | 0.0145 | 0.0689         | 0.0141  | -0.0110 | 0.0031  |
|               | 6             | p- $\pi$       | 3.14   | 0.0072 | 0.0263         | 0.0054  | -0.0041 | 0.0012  |
|               | 7             | p- $\pi$       | 3.30   | 0.0069 | 0.0219         | 0.0045  | -0.0035 | 0.0010  |
|               | 8             | $\pi$ - $\pi$  | 3.39   | 0.0061 | 0.0185         | 0.0038  | -0.0029 | 0.0008  |
|               | 9             | $\pi$ - $\pi$  | 3.53   | 0.0067 | 0.0193         | 0.0040  | -0.0032 | 0.0008  |
|               | 10            | $\pi$ - $\pi$  | 3.37   | 0.0068 | 0.0206         | 0.0043  | -0.0034 | 0.0008  |
| <b>TS2-IV</b> | 11            | $\pi$ - $\pi$  | 3.36   | 0.0067 | 0.0198         | 0.0041  | -0.0033 | 0.0008  |
|               | 1             | C...N          | 2.23   | 0.0492 | 0.0743         | 0.0257  | -0.0328 | -0.0071 |
|               | 2             | N-H...O        | 1.83   | 0.0324 | 0.1220         | 0.0303  | -0.0300 | 0.0002  |
|               | 3             | N-H...O        | 1.72   | 0.0419 | 0.1447         | 0.0397  | -0.0431 | -0.0035 |
|               | 4             | N-H...O        | 2.41   | 0.0126 | 0.0461         | 0.0097  | -0.0078 | 0.0019  |
|               | 5             | C-H...O        | 2.50   | 0.0079 | 0.0305         | 0.0061  | -0.0046 | 0.0015  |
|               | 6             | C-H...O        | 3.09   | 0.0090 | 0.0305         | 0.0064  | -0.0052 | 0.0012  |
|               | 7             | p- $\pi$       | 3.39   | 0.0039 | 0.0159         | 0.0030  | -0.0020 | 0.0010  |
|               | 8             | p- $\pi$       | 3.17   | 0.0090 | 0.0290         | 0.0062  | -0.0052 | 0.0010  |
|               | 9             | p- $\pi$       | 3.40   | 0.0063 | 0.0188         | 0.0039  | -0.0030 | 0.0009  |
|               | 10            | $\pi$ - $\pi$  | 3.14   | 0.0107 | 0.0305         | 0.0068  | -0.0061 | 0.0008  |
|               | 11            | $\pi$ - $\pi$  | 3.37   | 0.0065 | 0.0196         | 0.0041  | -0.0032 | 0.0009  |
| 12            | $\pi$ - $\pi$ | 2.23           | 0.0492 | 0.0743 | 0.0257         | -0.0328 | -0.0071 |         |
| <b>IM3-IV</b> | 1             | N-H...O        | 1.96   | 0.0230 | 0.1004         | 0.0221  | -0.0191 | 0.0030  |
|               | 2             | O-H...N        | 1.63   | 0.0652 | 0.0742         | 0.0411  | -0.0636 | -0.0225 |
|               | 3             | C-H...O        | 2.94   | 0.0048 | 0.0170         | 0.0034  | -0.0025 | 0.0009  |
|               | 4             | p- $\pi$       | 3.16   | 0.0091 | 0.0290         | 0.0062  | -0.0052 | 0.0010  |
|               | 5             | $\pi$ - $\pi$  | 3.41   | 0.0063 | 0.0184         | 0.0038  | -0.0029 | 0.0008  |
|               | 6             | $\pi$ - $\pi$  | 3.43   | 0.0060 | 0.0182         | 0.0037  | -0.0029 | 0.0008  |

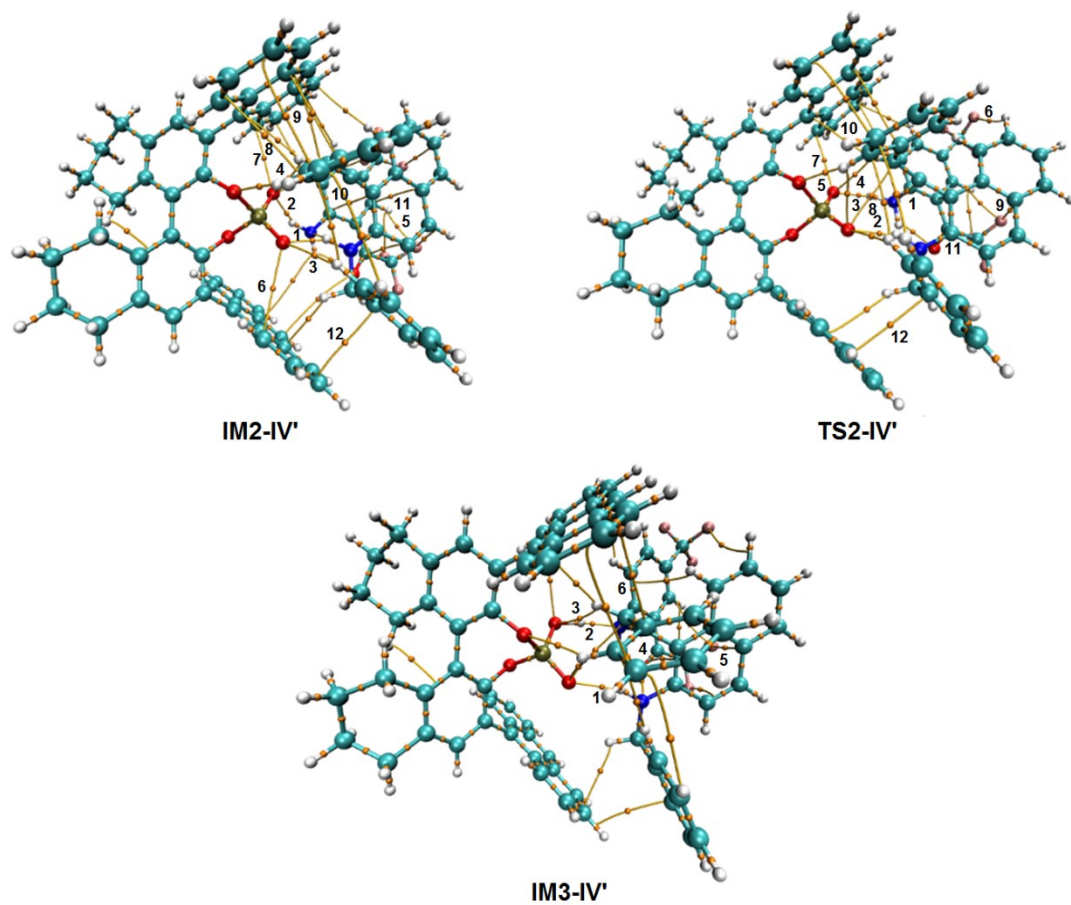

**Figure S13** QTAIM analyses of intermolecular interactions in **IM2-IV'**, **TS2-IV'** and **IM3-IV'** in pathway **IV'** and numbers of bond critical points (BCPs No.).

**Table S14** Numbers of bond critical points (BCPs No.) and the corresponding distances between atoms ( $d$ , in Å), classifications of the intermolecular interactions, electron density ( $\rho$ , in a.u.) and its Laplacian value ( $\nabla^2\rho$ , in a.u.), the electronic kinetic energy density ( $G$ , in a.u.), the electronic potential energy density ( $V$ , in a.u.) and the electronic energy density ( $H$ , in a.u.) at the BCPs of **IM2-IV'**, **TS2-IV'** and **IM3-IV'** in pathway **IV'**.

|                | BCPs No. | Classification | $d$  | $\rho$ | $\nabla^2\rho$ | $G$    | $V$     | $H$     |
|----------------|----------|----------------|------|--------|----------------|--------|---------|---------|
| <b>IM2-IV'</b> | 1        | N-H...O        | 1.69 | 0.0465 | 0.1377         | 0.0413 | -0.0482 | -0.0069 |
|                | 2        | N-H...O        | 1.87 | 0.0309 | 0.1153         | 0.0283 | -0.0278 | 0.0005  |
|                | 3        | C-H...O        | 2.58 | 0.0071 | 0.0266         | 0.0053 | -0.0040 | 0.0013  |
|                | 4        | C-H...O        | 2.39 | 0.0105 | 0.0425         | 0.0087 | -0.0067 | 0.0020  |
|                | 5        | C-H...F        | 2.29 | 0.0136 | 0.0642         | 0.0131 | -0.0102 | 0.0029  |
|                | 6        | p- $\pi$       | 3.39 | 0.0046 | 0.0163         | 0.0032 | -0.0023 | 0.0009  |
|                | 7        | p- $\pi$       | 3.08 | 0.0075 | 0.0285         | 0.0058 | -0.0044 | 0.0013  |
|                | 8        | $\pi$ - $\pi$  | 3.42 | 0.0063 | 0.0194         | 0.0040 | -0.0031 | 0.0009  |
|                | 9        | $\pi$ - $\pi$  | 3.41 | 0.0065 | 0.0198         | 0.0041 | -0.0032 | 0.0009  |
|                | 10       | $\pi$ - $\pi$  | 3.32 | 0.0062 | 0.0197         | 0.0041 | -0.0032 | 0.0009  |
|                | 11       | $\pi$ - $\pi$  | 3.40 | 0.0060 | 0.0178         | 0.0037 | -0.0029 | 0.0008  |
|                | 12       | $\pi$ - $\pi$  | 3.32 | 0.0068 | 0.0208         | 0.0044 | -0.0035 | 0.0008  |
| <b>TS2-IV'</b> | 1        | C...N          | 2.25 | 0.0471 | 0.0787         | 0.0259 | -0.0322 | -0.0063 |
|                | 2        | N-H...O        | 1.80 | 0.0335 | 0.1268         | 0.0316 | -0.0315 | 0.0001  |
|                | 3        | N-H...O        | 1.62 | 0.0559 | 0.1445         | 0.0488 | -0.0615 | -0.0127 |
|                | 4        | C-H...O        | 2.41 | 0.0123 | 0.0447         | 0.0093 | -0.0073 | 0.0019  |
|                | 5        | C-H...O        | 2.34 | 0.0108 | 0.0428         | 0.0086 | -0.0065 | 0.0021  |
|                | 6        | C-H...F        | 2.68 | 0.0048 | 0.0204         | 0.0039 | -0.0027 | 0.0012  |
|                | 7        | p- $\pi$       | 3.16 | 0.0066 | 0.0259         | 0.0052 | -0.0038 | 0.0013  |
|                | 8        | p- $\pi$       | 3.10 | 0.0092 | 0.0313         | 0.0066 | -0.0054 | 0.0012  |
|                | 9        | p- $\pi$       | 2.98 | 0.0085 | 0.036          | 0.0072 | -0.0054 | 0.0018  |
|                | 10       | $\pi$ - $\pi$  | 3.31 | 0.0075 | 0.0228         | 0.0048 | -0.0039 | 0.0009  |
|                | 11       | $\pi$ - $\pi$  | 2.97 | 0.0085 | 0.0349         | 0.0072 | -0.0056 | 0.0016  |
|                | 12       | $\pi$ - $\pi$  | 3.20 | 0.0078 | 0.0240         | 0.0051 | -0.0042 | 0.0009  |
| <b>IM3-IV'</b> | 1        | N-H...O        | 1.94 | 0.0232 | 0.1015         | 0.0223 | -0.0192 | 0.0031  |
|                | 2        | O-H...N        | 1.57 | 0.0746 | 0.0654         | 0.0452 | -0.0739 | -0.0288 |
|                | 3        | C-H...O        | 2.57 | 0.0100 | 0.0387         | 0.0079 | -0.0062 | 0.0017  |
|                | 4        | p- $\pi$       | 3.11 | 0.0079 | 0.0247         | 0.0053 | -0.0043 | 0.0009  |
|                | 5        | p- $\pi$       | 2.98 | 0.0081 | 0.0342         | 0.0068 | -0.0050 | 0.0018  |
|                | 6        | $\pi$ - $\pi$  | 3.36 | 0.0065 | 0.0194         | 0.0040 | -0.0031 | 0.0009  |

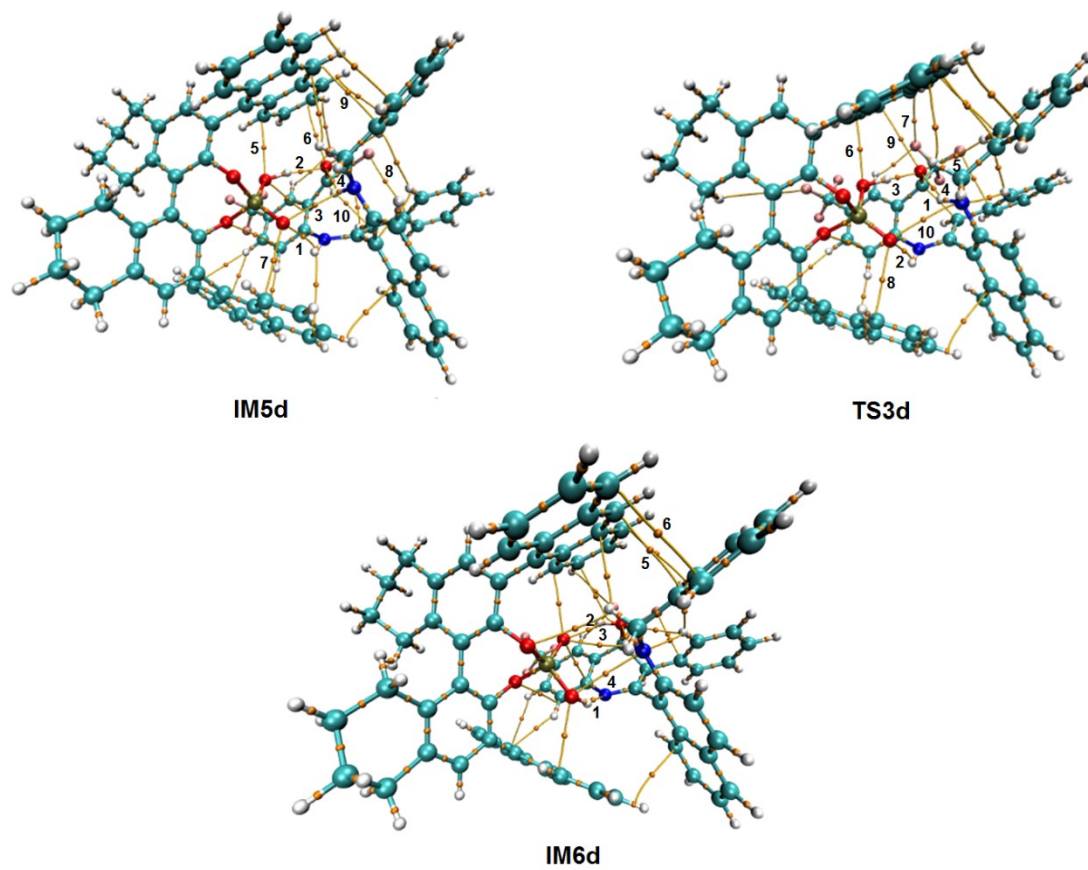

**Figure S14** QTAIM analyses of intermolecular interactions in **IM5d**, **TS3d** and **IM6d** in annulation processes by **IM4d** and numbers of bond critical points (BCPs No.).



**Table S15** Numbers of bond critical points (BCPs No.) and the corresponding distances between atoms ( $d$ , in Å), classifications of the intermolecular interactions, electron density ( $\rho$ , in a.u.) and its Laplacian value ( $\nabla^2\rho$ , in a.u.), the electronic kinetic energy density ( $G$ , in a.u.), the electronic potential energy density ( $V$ , in a.u.) and the electronic energy density ( $H$ , in a.u.) at the BCPs of **IM5d**, **TS3d** and **IM6d** in annulation processes by **IM4d**.

|             | BCPs No. | Classification | $d$  | $\rho$ | $\nabla^2\rho$ | $G$    | $V$     | $H$     |
|-------------|----------|----------------|------|--------|----------------|--------|---------|---------|
| <b>IM5d</b> | 1        | N-H...O        | 2.19 | 0.0169 | 0.0738         | 0.0156 | -0.0128 | 0.0028  |
|             | 2        | O-H...O        | 1.81 | 0.0321 | 0.1117         | 0.0290 | -0.0301 | -0.0011 |
|             | 3        | N-H...O        | 2.42 | 0.0121 | 0.0495         | 0.0103 | -0.0081 | 0.0021  |
|             | 4        | N-H...O        | 2.12 | 0.0178 | 0.0805         | 0.0171 | -0.0140 | 0.0031  |
|             | 5        | p- $\pi$       | 2.89 | 0.0106 | 0.0428         | 0.0089 | -0.0071 | 0.0018  |
|             | 6        | p- $\pi$       | 3.21 | 0.0066 | 0.0247         | 0.0049 | -0.0036 | 0.0013  |
|             | 7        | p- $\pi$       | 2.93 | 0.0100 | 0.0384         | 0.0080 | -0.0063 | 0.0016  |
|             | 8        | p- $\pi$       | 3.39 | 0.0041 | 0.0162         | 0.0031 | -0.0021 | 0.0010  |
|             | 9        | $\pi$ - $\pi$  | 3.20 | 0.0081 | 0.0247         | 0.0053 | -0.0044 | 0.0009  |
|             | 10       | $\pi$ - $\pi$  | 2.89 | 0.0133 | 0.0405         | 0.0092 | -0.0083 | 0.0009  |
| <b>TS3d</b> | 1        | C...C          | 2.19 | 0.0597 | 0.0468         | 0.0228 | -0.0340 | -0.0111 |
|             | 2        | N-H...O        | 2.08 | 0.0204 | 0.0884         | 0.0192 | -0.0163 | 0.0029  |
|             | 3        | O-H...O        | 1.56 | 0.0652 | 0.1212         | 0.0521 | -0.0739 | -0.0218 |
|             | 4        | N-H...O        | 1.93 | 0.0254 | 0.1070         | 0.0244 | -0.0220 | 0.0024  |
|             | 5        | C-H...O        | 2.89 | 0.0041 | 0.0138         | 0.0028 | -0.0021 | 0.0007  |
|             | 6        | p- $\pi$       | 1.10 | 0.2751 | -0.9289        | 0.0418 | -0.3158 | -0.2740 |
|             | 7        | p- $\pi$       | 3.17 | 0.0056 | 0.0248         | 0.0048 | -0.0033 | 0.0014  |
|             | 8        | p- $\pi$       | 2.91 | 0.0105 | 0.0409         | 0.0085 | -0.0068 | 0.0017  |
|             | 9        | $\pi$ - $\pi$  | 3.25 | 0.0063 | 0.0223         | 0.0045 | -0.0033 | 0.0011  |
|             | 10       | van der Waals  | 2.94 | 0.0111 | 0.0462         | 0.0095 | -0.0076 | 0.0020  |
| <b>IM6d</b> | 1        | O-H...N        | 1.80 | 0.0417 | 0.0894         | 0.0290 | -0.0357 | -0.0067 |
|             | 2        | O-H...O        | 1.94 | 0.0227 | 0.0973         | 0.0217 | -0.0190 | 0.0026  |
|             | 3        | N-H...O        | 2.47 | 0.0095 | 0.0358         | 0.0073 | -0.0056 | 0.0017  |
|             | 4        | p-p            | 2.98 | 0.0105 | 0.0422         | 0.0088 | -0.0070 | 0.0018  |
|             | 5        | $\pi$ - $\pi$  | 3.35 | 0.0082 | 0.0245         | 0.0053 | -0.0045 | 0.0008  |
|             | 6        | $\pi$ - $\pi$  | 3.20 | 0.0060 | 0.0178         | 0.0037 | -0.0030 | 0.0008  |

#### 4. Calculation of ee Value

To compare the calculated results with the experimental results, the ee values of pathways **I'** and **IV** are calculated using the Gibbs free energy as follows:

$$\Delta G_{act}(TSII - I') = G(TSII - I') - (G(R1) + G(R2) + G(C1)) \quad \text{formula (1)}$$

$$\Delta G_{act}(TSII - IV) = G(TSII - IV) - (G(R1) + G(R2) + G(C1)) \quad \text{formula (2)}$$

$$\begin{aligned} P(TSII - I') : mP(TSII - IV) \\ = \exp\left(-\frac{\Delta G_{act}(TSII - I')}{RT}\right) : \exp\left(-\frac{\Delta G_{act}(TSII - IV)}{RT}\right) \\ = 2.3 \times 10^3 : 1 \end{aligned}$$

In the above formula,  $R = 1.987 \times 10^{-3} \text{ kcal} \cdot \text{mol}^{-1} \cdot \text{K}^{-1}$ ,  $T = 298.15 \text{ K}$ .

$$e.e. = \frac{[P] - [mP]}{[P] + [mP]} \times 100\% = 99\% \quad \text{formula (3)}$$

## 5. Cartesian Coordinates

### R1

|   |             |             |             |
|---|-------------|-------------|-------------|
| C | 0.36728500  | 5.25794800  | 0.38336400  |
| C | -0.81164000 | 4.62919700  | 0.07575400  |
| C | -0.85468200 | 3.22877400  | -0.13631200 |
| C | 0.34020500  | 2.46803400  | -0.02668000 |
| C | 1.54581100  | 3.14353500  | 0.29297500  |
| C | 1.55656100  | 4.50103800  | 0.49189300  |
| H | -2.97821700 | 3.13676900  | -0.53270000 |
| H | 0.39209100  | 6.33053500  | 0.54383100  |
| H | -1.73512000 | 5.19554600  | -0.01130100 |
| C | -2.06325300 | 2.55583200  | -0.45486200 |
| C | 0.29358200  | 1.05515800  | -0.24403900 |
| H | 2.46001900  | 2.56464800  | 0.37768300  |
| H | 2.48861200  | 5.00096100  | 0.73619300  |
| C | -0.91611300 | 0.42310400  | -0.55968100 |
| C | -2.10235900 | 1.20504000  | -0.65869200 |
| H | -3.04477000 | 0.71720200  | -0.87986000 |
| C | 1.47367100  | 0.26320100  | -0.15061100 |
| C | 2.45203800  | -0.45398300 | -0.08335300 |
| C | 3.62296700  | -1.27042400 | 0.00556300  |
| C | 4.87985400  | -0.68338400 | 0.21649000  |
| C | 3.53284500  | -2.66502200 | -0.11585800 |
| C | 6.01601200  | -1.47651700 | 0.30358900  |
| H | 4.94988100  | 0.39520900  | 0.30973800  |
| C | 4.67432800  | -3.45073100 | -0.02879600 |
| H | 2.56175100  | -3.12201200 | -0.27604600 |
| C | 5.91829700  | -2.86063800 | 0.18103300  |
| H | 6.98305100  | -1.01223800 | 0.46728400  |
| H | 4.59260000  | -4.52853100 | -0.12429800 |
| H | 6.80841900  | -3.47719700 | 0.24895500  |
| N | -0.95366800 | -0.93594000 | -0.75345600 |
| H | -0.05151900 | -1.38469100 | -0.80884900 |
| C | -2.08025300 | -1.62011900 | -1.34363500 |
| H | -2.43748100 | -1.09041000 | -2.23918400 |
| H | -1.71789000 | -2.59435300 | -1.68712100 |
| C | -3.24837500 | -1.83701500 | -0.39575400 |
| C | -3.06953000 | -1.83654500 | 0.98645600  |
| C | -4.52364200 | -2.06135900 | -0.91700500 |
| C | -4.14962800 | -2.06696300 | 1.83406500  |
| H | -2.07994500 | -1.64437700 | 1.38938600  |
| C | -5.60256600 | -2.29568700 | -0.07102300 |
| H | -4.67237700 | -2.05024400 | -1.99445400 |

|           |             |             |             |
|-----------|-------------|-------------|-------------|
| C         | -5.41730400 | -2.29922300 | 1.30902200  |
| H         | -4.00016800 | -2.06088100 | 2.90916100  |
| H         | -6.58932300 | -2.46803600 | -0.48891300 |
| H         | -6.25861200 | -2.47581900 | 1.97126800  |
| <b>C1</b> |             |             |             |
| P         | 0.00381100  | -1.45560600 | 0.02320700  |
| O         | 0.98786700  | -0.43959300 | 0.81027700  |
| O         | -0.97186100 | -0.45926600 | -0.78406300 |
| O         | -0.57601900 | -2.44846700 | 0.92725100  |
| C         | 1.52073900  | 0.60938200  | 0.07126700  |
| C         | 0.69501200  | 1.68482900  | -0.25270900 |
| C         | 2.85480700  | 0.53345600  | -0.32636800 |
| C         | 3.34293800  | 1.58515200  | -1.09600200 |
| C         | 2.53303800  | 2.64615200  | -1.50756800 |
| H         | 4.38309100  | 1.55726900  | -1.41263100 |
| C         | -1.51802400 | 0.58723600  | -0.04595400 |
| C         | -0.70427500 | 1.67664700  | 0.26677500  |
| C         | -2.85303800 | 0.50341500  | 0.34383600  |
| C         | -3.35080700 | 1.55715300  | 1.10542900  |
| C         | -2.55284800 | 2.62833000  | 1.51204800  |
| H         | -4.39161600 | 1.52120700  | 1.41873000  |
| C         | -1.20947400 | 2.68555700  | 1.11086300  |
| C         | -0.28463200 | 3.75108700  | 1.67256500  |
| C         | -1.02848600 | 4.97464500  | 2.20068300  |
| H         | -1.45159100 | 5.54198900  | 1.36088400  |
| C         | -2.15287400 | 4.54171700  | 3.13631800  |
| H         | -2.64058200 | 5.40798600  | 3.59285000  |
| C         | -3.17818100 | 3.71446500  | 2.36623500  |
| H         | -3.90277600 | 3.26219900  | 3.05096800  |
| H         | 0.27862200  | 3.29114500  | 2.49721900  |
| C         | 1.18926000  | 2.69190700  | -1.10593800 |
| C         | 0.25242700  | 3.74187600  | -1.67671200 |
| C         | 0.98198000  | 4.96969700  | -2.21465900 |
| H         | 1.39795300  | 5.54896200  | -1.37946200 |
| C         | 2.11177000  | 4.54248000  | -3.14639400 |
| H         | 2.58981600  | 5.41069800  | -3.60936700 |
| C         | 3.14622800  | 3.73324000  | -2.36941600 |
| H         | 3.71286900  | 4.41202300  | -1.71760800 |
| H         | -0.30488300 | 3.26809000  | -2.49753500 |
| H         | -3.75344200 | 4.38149100  | 1.70985000  |
| H         | -1.73066100 | 3.94246700  | 3.95271100  |
| H         | -0.32577900 | 5.63854800  | 2.71273100  |
| H         | 0.46718900  | 4.04721500  | 0.93822900  |

|   |             |             |             |
|---|-------------|-------------|-------------|
| H | -0.50315500 | 4.03450000  | -0.94489100 |
| H | 0.27172200  | 5.62095500  | -2.73242300 |
| H | 1.69699600  | 3.93209900  | -3.95833600 |
| H | 3.87684300  | 3.28482900  | -3.05033500 |
| O | 0.82811400  | -1.98184200 | -1.23500900 |
| H | 1.36397100  | -2.76087700 | -1.03289500 |
| C | 4.17062800  | -0.02158100 | 3.70798900  |
| C | 3.74647300  | 0.14610600  | 2.42380600  |
| C | 4.13048100  | -0.77175300 | 1.39337500  |
| C | 4.98268000  | -1.86992700 | 1.75260400  |
| C | 5.40622000  | -2.00834800 | 3.11200800  |
| C | 5.01292100  | -1.11573800 | 4.06162600  |
| C | 3.70992000  | -0.62634800 | 0.05601100  |
| C | 5.38405200  | -2.77776500 | 0.77304200  |
| C | 4.96627000  | -2.65146200 | -0.55077100 |
| C | 4.10822400  | -1.55944100 | -0.92212700 |
| C | 3.66643100  | -1.48532400 | -2.28574400 |
| H | 2.98762600  | -0.68945300 | -2.57096400 |
| C | 4.06315500  | -2.41207400 | -3.20380900 |
| C | 4.93411900  | -3.47999100 | -2.83593800 |
| C | 5.36703700  | -3.59440300 | -1.55037500 |
| H | 3.86598300  | 0.68439700  | 4.47365700  |
| H | 3.10880200  | 0.98514400  | 2.16753300  |
| H | 6.04989000  | -2.84560000 | 3.36671600  |
| H | 5.33860100  | -1.23030700 | 5.09028000  |
| H | 6.03331700  | -3.60553600 | 1.04890700  |
| H | 3.70978100  | -2.34166100 | -4.22734500 |
| H | 5.24144100  | -4.20266400 | -3.58464400 |
| H | 6.02273600  | -4.40833000 | -1.25404500 |
| C | -4.08382000 | -2.40832000 | 3.23421100  |
| C | -3.65967400 | -1.50709000 | 2.30474600  |
| C | -4.11442500 | -1.57770900 | 0.94740100  |
| C | -5.00226900 | -2.64817000 | 0.58771100  |
| C | -5.42811700 | -3.56819700 | 1.59734800  |
| C | -4.99012600 | -3.45053500 | 2.88065900  |
| C | -3.70906300 | -0.65575700 | -0.03611300 |
| C | -5.42852000 | -2.77288000 | -0.73326700 |
| C | -5.00909900 | -1.88237900 | -1.72116100 |
| C | -4.13519000 | -0.79857600 | -1.37125400 |
| C | -3.73998400 | 0.10736300  | -2.40813400 |
| H | -3.08714700 | 0.93717500  | -2.15903600 |
| C | -4.17042300 | -0.05945200 | -3.69054200 |
| C | -5.03304500 | -1.14043600 | -4.03534600 |
| C | -5.43926400 | -2.01982500 | -3.07853100 |

|   |             |             |             |
|---|-------------|-------------|-------------|
| H | -3.71923100 | -2.34331300 | 4.25409800  |
| H | -2.95132500 | -0.73354000 | 2.57914800  |
| H | -6.10735200 | -4.36641400 | 1.31107500  |
| H | -5.31749700 | -4.15524500 | 3.63822400  |
| H | -6.09974100 | -3.58591400 | -1.00084500 |
| H | -3.85566800 | 0.63712700  | -4.46087600 |
| H | -5.36428900 | -1.25523700 | -5.06230200 |
| H | -6.09942300 | -2.84645000 | -3.32637100 |

**COM1A**

|   |             |             |             |
|---|-------------|-------------|-------------|
| P | -0.61443000 | -0.57774200 | 1.00693200  |
| O | 0.03340400  | -0.73489800 | -0.46728500 |
| O | -2.12131000 | -1.10076200 | 0.79756700  |
| O | -0.42981500 | 0.80032400  | 1.48519900  |
| C | -0.18416700 | -1.95551800 | -1.09915700 |
| C | -1.44676600 | -2.21537100 | -1.62932900 |
| C | 0.86927300  | -2.86442300 | -1.16179200 |
| C | 0.59667500  | -4.09772000 | -1.74615100 |
| C | -0.67606500 | -4.43756100 | -2.21212800 |
| H | 1.40119700  | -4.82594600 | -1.81956300 |
| C | -2.78610700 | -0.59676800 | -0.31651000 |
| C | -2.46717000 | -1.12709400 | -1.56687000 |
| C | -3.72555500 | 0.41680800  | -0.13498800 |
| C | -4.34894600 | 0.89954800  | -1.28350000 |
| C | -4.01432600 | 0.44982900  | -2.56244900 |
| H | -5.09232200 | 1.68601600  | -1.17580700 |
| C | -3.04512100 | -0.55435500 | -2.71659600 |
| C | -2.54167300 | -0.93108300 | -4.09855200 |
| C | -3.52202200 | -0.57288700 | -5.21194100 |
| H | -4.39832000 | -1.23263900 | -5.15927700 |
| C | -3.97184500 | 0.87766700  | -5.06913100 |
| H | -4.60789200 | 1.17694300  | -5.90725500 |
| C | -4.72528700 | 1.06191600  | -3.75454300 |
| H | -4.90775200 | 2.12373400  | -3.55900000 |
| H | -1.59951000 | -0.38739800 | -4.26187700 |
| C | -1.71643000 | -3.49840800 | -2.14515100 |
| C | -3.13523000 | -3.89145500 | -2.51492900 |
| C | -3.19989400 | -5.11259900 | -3.42804600 |
| H | -2.82833400 | -4.84853600 | -4.42720200 |
| C | -2.34906000 | -6.24104700 | -2.85357900 |
| H | -2.45380200 | -7.15422300 | -3.44668600 |
| C | -0.88387700 | -5.81619500 | -2.80964300 |
| H | -0.48286800 | -5.81306100 | -3.83232800 |
| H | -3.66698400 | -4.11525700 | -1.57913300 |

|   |             |             |             |
|---|-------------|-------------|-------------|
| H | -5.71484100 | 0.59362600  | -3.84358600 |
| H | -3.08937800 | 1.52997800  | -5.08827500 |
| H | -3.05161000 | -0.74325600 | -6.18471700 |
| H | -2.27696300 | -1.98932200 | -4.14581000 |
| H | -3.67152000 | -3.04981000 | -2.95871300 |
| H | -4.24065000 | -5.42781600 | -3.54702200 |
| H | -2.69825800 | -6.47375400 | -1.83980600 |
| H | -0.28731500 | -6.54484600 | -2.25134500 |
| O | -0.08615500 | -1.78162600 | 1.88068200  |
| H | 0.69463100  | -1.57395100 | 2.42565100  |
| C | 3.24419600  | -0.03600700 | -3.29304600 |
| C | 2.47358900  | -0.90762700 | -2.58295600 |
| C | 2.98971600  | -1.57174500 | -1.42213200 |
| C | 4.33870800  | -1.28126900 | -1.02514800 |
| C | 5.11494100  | -0.36426900 | -1.80233400 |
| C | 4.58838200  | 0.23503900  | -2.90462300 |
| C | 2.23305100  | -2.50164800 | -0.68160200 |
| C | 4.87833200  | -1.91270300 | 0.09482900  |
| C | 4.13774100  | -2.83343000 | 0.83650900  |
| C | 2.78236200  | -3.12474000 | 0.45603700  |
| C | 2.03705300  | -4.04295500 | 1.26697700  |
| H | 0.99878600  | -4.23310400 | 1.01695400  |
| C | 2.60926700  | -4.65478900 | 2.34404200  |
| C | 3.96874700  | -4.39935000 | 2.69155200  |
| C | 4.70324100  | -3.51031600 | 1.96404300  |
| H | 2.83354300  | 0.45856700  | -4.16809900 |
| H | 1.45680300  | -1.11217900 | -2.89991500 |
| H | 6.12979700  | -0.14301800 | -1.47959700 |
| H | 5.18283300  | 0.93731100  | -3.47971800 |
| H | 5.90226500  | -1.68821900 | 0.38560800  |
| H | 2.02518100  | -5.34370900 | 2.94594600  |
| H | 4.41035900  | -4.90901200 | 3.54213600  |
| H | 5.73573900  | -3.29533100 | 2.22604400  |
| C | -2.67330500 | 4.44912100  | 0.84546100  |
| C | -2.99206500 | 3.15874500  | 0.54477500  |
| C | -3.64866500 | 2.31240800  | 1.49706000  |
| C | -3.92748000 | 2.85764300  | 2.79687600  |
| C | -3.57518400 | 4.21645800  | 3.07400500  |
| C | -2.97396700 | 4.99059500  | 2.12952800  |
| C | -4.00452500 | 0.97786200  | 1.21632200  |
| C | -4.52791900 | 2.05482100  | 3.76475100  |
| C | -4.87000300 | 0.72883900  | 3.50224900  |
| C | -4.61027400 | 0.17512900  | 2.20344600  |
| C | -4.99454200 | -1.18427900 | 1.96606100  |

|   |             |             |             |
|---|-------------|-------------|-------------|
| H | -4.81930100 | -1.61605300 | 0.98649900  |
| C | -5.57515500 | -1.93410300 | 2.94489500  |
| C | -5.82095900 | -1.38374800 | 4.23651800  |
| C | -5.48086800 | -0.09249800 | 4.50168400  |
| H | -2.17857000 | 5.06665900  | 0.10246500  |
| H | -2.74336200 | 2.76290100  | -0.43352200 |
| H | -3.79887600 | 4.61264700  | 4.06077900  |
| H | -2.71083500 | 6.02010200  | 2.35011400  |
| H | -4.73218700 | 2.47130000  | 4.74872600  |
| H | -5.85556900 | -2.96263200 | 2.74203600  |
| H | -6.28269400 | -1.99841100 | 5.00234300  |
| H | -5.66706000 | 0.34274000  | 5.47972200  |
| C | 7.79002800  | 2.29234200  | -0.33351100 |
| C | 6.87902400  | 2.88692500  | -1.17162800 |
| C | 5.48853900  | 2.78164900  | -0.92767200 |
| C | 5.03102800  | 2.05741100  | 0.20605300  |
| C | 5.99228700  | 1.46620200  | 1.06617500  |
| C | 7.33489300  | 1.57615600  | 0.79779500  |
| H | 4.87224100  | 3.88526100  | -2.68385800 |
| H | 8.85345800  | 2.37158500  | -0.53289600 |
| H | 7.21254400  | 3.44075800  | -2.04578400 |
| C | 4.52452300  | 3.32750200  | -1.81777400 |
| C | 3.62897000  | 1.90048100  | 0.42052600  |
| H | 5.64201400  | 0.91218500  | 1.93190900  |
| H | 8.05637700  | 1.11003200  | 1.46205100  |
| C | 2.69844300  | 2.42976200  | -0.48744500 |
| C | 3.18481300  | 3.14999400  | -1.62197000 |
| H | 2.47142300  | 3.57949200  | -2.31725900 |
| C | 3.13450800  | 1.17567800  | 1.54128100  |
| C | 2.63018700  | 0.58801300  | 2.47642800  |
| C | 2.00100500  | -0.13147300 | 3.54209200  |
| C | 2.47031500  | -1.40444900 | 3.90795200  |
| C | 0.85536500  | 0.38748800  | 4.17186600  |
| C | 1.80167500  | -2.14248000 | 4.88095200  |
| H | 3.34225600  | -1.81272700 | 3.40757700  |
| C | 0.19826900  | -0.35929500 | 5.14056500  |
| H | 0.47022300  | 1.34830100  | 3.85206300  |
| C | 0.66662600  | -1.62343400 | 5.49785700  |
| H | 2.16665900  | -3.13079000 | 5.14238700  |
| H | -0.69743000 | 0.03984000  | 5.60485900  |
| H | 0.13939100  | -2.20642200 | 6.24566000  |
| N | 1.36100700  | 2.28615900  | -0.27096600 |
| H | 1.06537300  | 1.77097800  | 0.55250800  |
| C | 0.35570700  | 2.43680500  | -1.29228600 |



|   |             |            |             |
|---|-------------|------------|-------------|
| H | 0.71153700  | 2.00521300 | -2.24058000 |
| H | -0.49967700 | 1.82752900 | -0.97985900 |
| C | -0.12108800 | 3.85832600 | -1.53554400 |
| C | 0.44683700  | 4.95316500 | -0.88715200 |
| C | -1.16781500 | 4.07467200 | -2.43660100 |
| C | -0.01358600 | 6.24346100 | -1.14598400 |
| H | 1.24603700  | 4.78517800 | -0.17217800 |
| C | -1.63750000 | 5.35894000 | -2.68714200 |
| H | -1.62280800 | 3.22139800 | -2.93703700 |
| C | -1.05564700 | 6.45117700 | -2.04424400 |
| H | 0.44098800  | 7.08789900 | -0.63725500 |
| H | -2.45683800 | 5.50969200 | -3.38309900 |
| H | -1.41706800 | 7.45536900 | -2.24078600 |

### TS1A

Value of imaginary frequency = -1179.88 cm<sup>-1</sup>

|   |             |             |             |
|---|-------------|-------------|-------------|
| P | 0.64559000  | 0.02187500  | -0.76139700 |
| O | 0.47551600  | -1.10354600 | 0.42070300  |
| O | 2.21341000  | -0.17221400 | -1.15190400 |
| O | 0.35018600  | 1.34637700  | -0.15290900 |
| C | 0.94128700  | -2.36569600 | 0.10102800  |
| C | 2.32030000  | -2.59899900 | 0.12982100  |
| C | 0.02189300  | -3.34836000 | -0.26173100 |
| C | 0.53510200  | -4.59282400 | -0.61934600 |
| C | 1.90650900  | -4.84758600 | -0.67360800 |
| H | -0.16168800 | -5.37938800 | -0.90041700 |
| C | 3.09034700  | -0.25793800 | -0.08558300 |
| C | 3.20064000  | -1.47988800 | 0.58176700  |
| C | 3.79379900  | 0.88113900  | 0.30563800  |
| C | 4.68192200  | 0.73955400  | 1.36844900  |
| C | 4.81244300  | -0.45708200 | 2.07616100  |
| H | 5.25294900  | 1.60871800  | 1.68719200  |
| C | 4.03405500  | -1.56844500 | 1.71355600  |
| C | 3.99091200  | -2.79614200 | 2.60693300  |
| C | 5.21284700  | -2.92641800 | 3.51201800  |
| H | 6.09373000  | -3.18529500 | 2.90935600  |
| C | 5.46938200  | -1.61180300 | 4.24213800  |
| H | 6.28989500  | -1.71308300 | 4.95885400  |
| C | 5.79215800  | -0.51372600 | 3.23264500  |
| H | 5.82915900  | 0.46405000  | 3.72388000  |
| H | 3.09044800  | -2.71137800 | 3.23245800  |
| C | 2.81483300  | -3.83736900 | -0.32084100 |
| C | 4.30435400  | -4.03362700 | -0.54044200 |
| C | 4.71262000  | -5.50271500 | -0.60420900 |

|   |             |             |             |
|---|-------------|-------------|-------------|
| H | 4.61941400  | -5.95744000 | 0.39127700  |
| C | 3.81841300  | -6.25151900 | -1.58789400 |
| H | 4.15160500  | -7.28602200 | -1.71430900 |
| C | 2.37282900  | -6.22698900 | -1.09877500 |
| H | 2.27743800  | -6.90533600 | -0.23980300 |
| H | 4.55898300  | -3.55048700 | -1.49444200 |
| H | 6.79803000  | -0.68995500 | 2.82734100  |
| H | 4.57392700  | -1.33751400 | 4.81409700  |
| H | 5.05925800  | -3.74534600 | 4.22122300  |
| H | 3.84993900  | -3.70642200 | 2.02114100  |
| H | 4.88654300  | -3.50348500 | 0.21622300  |
| H | 5.76488000  | -5.58061400 | -0.89386100 |
| H | 3.88493400  | -5.76923200 | -2.57123900 |
| H | 1.69851100  | -6.61525400 | -1.86905100 |
| O | -0.12227300 | -0.41994900 | -2.00026600 |
| H | -1.19021200 | 0.35578000  | -2.14830000 |
| C | -2.23130000 | -2.87462200 | 3.36391600  |
| C | -1.51116200 | -2.95823500 | 2.20758200  |
| C | -2.15978000 | -2.97172000 | 0.93000800  |
| C | -3.59323900 | -2.87638400 | 0.90374300  |
| C | -4.31063400 | -2.81614500 | 2.14033300  |
| C | -3.65538300 | -2.81525100 | 3.33436200  |
| C | -1.44784100 | -3.09144400 | -0.28077100 |
| C | -4.26261000 | -2.86804800 | -0.32032300 |
| C | -3.56464800 | -2.93969300 | -1.52502000 |
| C | -2.13215200 | -3.04676700 | -1.51175700 |
| C | -1.44693600 | -3.07732300 | -2.77084100 |
| H | -0.36347500 | -3.09451000 | -2.77192000 |
| C | -2.13668600 | -3.03075600 | -3.94511100 |
| C | -3.56064100 | -2.95690800 | -3.95450800 |
| C | -4.24997900 | -2.90913400 | -2.78125500 |
| H | -1.71733200 | -2.86757700 | 4.32012300  |
| H | -0.42874200 | -3.01979500 | 2.24448600  |
| H | -5.39597300 | -2.76500500 | 2.09605600  |
| H | -4.20998400 | -2.76717000 | 4.26625300  |
| H | -5.34912000 | -2.79124300 | -0.33606700 |
| H | -1.59783500 | -3.03597400 | -4.88689600 |
| H | -4.08915800 | -2.92965500 | -4.90217900 |
| H | -5.33417000 | -2.84098100 | -2.76883600 |
| C | 1.59537800  | 3.86996600  | 2.41670500  |
| C | 2.31344200  | 2.92723400  | 1.74376900  |
| C | 2.78530500  | 3.16411900  | 0.40986900  |
| C | 2.45434600  | 4.41838300  | -0.20521400 |
| C | 1.70382100  | 5.38448200  | 0.53862300  |

|   |             |             |             |
|---|-------------|-------------|-------------|
| C | 1.28843600  | 5.12363500  | 1.80791000  |
| C | 3.50324500  | 2.20001200  | -0.32497200 |
| C | 2.84799300  | 4.66628100  | -1.51879500 |
| C | 3.55231800  | 3.71606100  | -2.25752600 |
| C | 3.88272400  | 2.45573600  | -1.65593000 |
| C | 4.58745500  | 1.49458200  | -2.44988700 |
| H | 4.84087500  | 0.53799500  | -2.00516000 |
| C | 4.93272400  | 1.76385100  | -3.74062100 |
| C | 4.60545400  | 3.01773000  | -4.33518600 |
| C | 3.94105700  | 3.96252900  | -3.61262900 |
| H | 1.23658900  | 3.66825900  | 3.42199100  |
| H | 2.52338600  | 1.97041800  | 2.20901100  |
| H | 1.46567200  | 6.32883900  | 0.05690800  |
| H | 0.71170700  | 5.85694100  | 2.36292500  |
| H | 2.58446000  | 5.61371800  | -1.98394100 |
| H | 5.46184800  | 1.01886800  | -4.32597500 |
| H | 4.89193500  | 3.21457000  | -5.36330700 |
| H | 3.68998700  | 4.92495700  | -4.05152100 |
| C | -7.67808100 | -0.76675900 | -0.70306200 |
| C | -7.17181400 | -0.51795800 | 0.55584400  |
| C | -5.87193200 | -0.00008500 | 0.71486200  |
| C | -5.07533800 | 0.26769900  | -0.41993400 |
| C | -5.61079000 | 0.01912200  | -1.69575100 |
| C | -6.88760400 | -0.49073400 | -1.83128900 |
| H | -5.95536200 | 0.04965100  | 2.88141200  |
| H | -8.67842200 | -1.16790700 | -0.82331000 |
| H | -7.76839400 | -0.71967400 | 1.44172400  |
| C | -5.32093100 | 0.24175100  | 2.01915600  |
| C | -3.72304200 | 0.77226800  | -0.23400100 |
| H | -4.99660200 | 0.20790200  | -2.57103900 |
| H | -7.28173700 | -0.68504100 | -2.82415000 |
| C | -3.18762200 | 0.92757500  | 1.09751700  |
| C | -4.05254500 | 0.67583500  | 2.21765500  |
| H | -3.67735300 | 0.84028700  | 3.22043400  |
| C | -2.92337500 | 1.10703300  | -1.28751700 |
| C | -2.01497200 | 1.35087600  | -2.13853600 |
| C | -1.56945200 | 2.52011200  | -2.90613700 |
| C | -2.42346000 | 3.60857300  | -3.12480500 |
| C | -0.26277900 | 2.55909600  | -3.40243500 |
| C | -1.97343800 | 4.71858900  | -3.82660600 |
| H | -3.43894900 | 3.57174200  | -2.74157200 |
| C | 0.18562700  | 3.67806500  | -4.09617700 |
| H | 0.39743500  | 1.71373500  | -3.23669300 |
| C | -0.66661600 | 4.75714700  | -4.31068500 |

|   |             |            |             |
|---|-------------|------------|-------------|
| H | -2.64158700 | 5.55751800 | -3.99376400 |
| H | 1.20612000  | 3.70029600 | -4.46601400 |
| H | -0.31617200 | 5.62790400 | -4.85597900 |
| N | -1.92557500 | 1.27999600 | 1.28542600  |
| H | -1.29470600 | 1.41242400 | 0.48311300  |
| C | -1.23500600 | 1.29097700 | 2.56338800  |
| H | -1.43099400 | 0.35490200 | 3.10003000  |
| H | -0.17109500 | 1.30386900 | 2.30150800  |
| C | -1.56236800 | 2.48614200 | 3.43298700  |
| C | -1.76044100 | 3.74603000 | 2.86397700  |
| C | -1.60940000 | 2.35109200 | 4.82026400  |
| C | -1.99942400 | 4.85128900 | 3.67405800  |
| H | -1.71380700 | 3.85566800 | 1.78397000  |
| C | -1.84249900 | 3.45850900 | 5.63221900  |
| H | -1.45953700 | 1.37126500 | 5.26786700  |
| C | -2.03846100 | 4.71135200 | 5.05992200  |
| H | -2.15404400 | 5.82611400 | 3.22174400  |
| H | -1.87728900 | 3.34000900 | 6.71046900  |
| H | -2.22499300 | 5.57491600 | 5.68999000  |

#### IM1A

|   |             |             |             |
|---|-------------|-------------|-------------|
| P | -0.50566100 | -0.26184000 | 0.74438100  |
| O | -0.35043900 | -1.21573200 | -0.60749000 |
| O | -2.13668600 | -0.35386300 | 0.96931700  |
| O | -0.15412300 | 1.12027500  | 0.26236700  |
| C | -0.89560300 | -2.47051700 | -0.47130900 |
| C | -2.27832300 | -2.61366200 | -0.61420600 |
| C | -0.06871600 | -3.55395000 | -0.16706000 |
| C | -0.67495100 | -4.79648000 | -0.00401800 |
| C | -2.05809300 | -4.96703800 | -0.07441000 |
| H | -0.04683600 | -5.65461100 | 0.22568100  |
| C | -2.97481000 | -0.28573100 | -0.11431800 |
| C | -3.07465100 | -1.39877700 | -0.95832600 |
| C | -3.74873800 | 0.86317600  | -0.31888000 |
| C | -4.61737600 | 0.85887800  | -1.40944100 |
| C | -4.67770000 | -0.19552600 | -2.31986200 |
| H | -5.24526300 | 1.73233200  | -1.57258700 |
| C | -3.87650800 | -1.32797100 | -2.11383600 |
| C | -3.79906200 | -2.41310000 | -3.17397400 |
| C | -5.00557300 | -2.42826300 | -4.10852200 |
| H | -5.89150000 | -2.78235800 | -3.56397400 |
| C | -5.27175300 | -1.02559400 | -4.64617000 |
| H | -6.07707700 | -1.03341600 | -5.38704000 |
| C | -5.63115300 | -0.09028800 | -3.49521100 |

|   |             |             |             |
|---|-------------|-------------|-------------|
| H | -5.66929500 | 0.94846400  | -3.83990500 |
| H | -2.89148400 | -2.22652500 | -3.76612700 |
| C | -2.87678600 | -3.86286300 | -0.35473000 |
| C | -4.38755800 | -3.98672500 | -0.25556600 |
| C | -4.88540900 | -5.42386200 | -0.38295200 |
| H | -4.75797100 | -5.76935300 | -1.41789300 |
| C | -4.10184100 | -6.33815000 | 0.55350600  |
| H | -4.50474100 | -7.35552600 | 0.53978200  |
| C | -2.63103100 | -6.35394200 | 0.14739200  |
| H | -2.52708200 | -6.92849000 | -0.78345900 |
| H | -4.68216000 | -3.59135600 | 0.72724700  |
| H | -6.64430500 | -0.33252400 | -3.14574700 |
| H | -4.37033600 | -0.65937200 | -5.15381800 |
| H | -4.83003600 | -3.13464900 | -4.92568800 |
| H | -3.65165700 | -3.39582300 | -2.72193200 |
| H | -4.88508100 | -3.34508800 | -0.98520300 |
| H | -5.95678600 | -5.46272900 | -0.16344400 |
| H | -4.19806900 | -5.96673500 | 1.58157400  |
| H | -2.02935300 | -6.87822600 | 0.89717400  |
| O | 0.14562700  | -0.91185100 | 1.90517200  |
| C | 2.48712800  | -2.49053000 | -3.45011500 |
| C | 1.67518000  | -2.79517700 | -2.39867900 |
| C | 2.21719100  | -3.08514400 | -1.10414700 |
| C | 3.64531500  | -3.05628000 | -0.94937200 |
| C | 4.46112200  | -2.75841100 | -2.08681900 |
| C | 3.90403100  | -2.47398700 | -3.29622100 |
| C | 1.40303900  | -3.40191100 | 0.00312100  |
| C | 4.20929500  | -3.32126400 | 0.29942300  |
| C | 3.41411800  | -3.59746600 | 1.41226700  |
| C | 1.98417700  | -3.63071400 | 1.26889500  |
| C | 1.19379100  | -3.85523900 | 2.44434800  |
| H | 0.11516300  | -3.79845800 | 2.36127300  |
| C | 1.78451800  | -4.08020600 | 3.65240500  |
| C | 3.20463300  | -4.08547000 | 3.78267600  |
| C | 3.99142900  | -3.84012300 | 2.69913200  |
| H | 2.05387700  | -2.26375600 | -4.41885700 |
| H | 0.59921200  | -2.81332400 | -2.52950700 |
| H | 5.54039300  | -2.75956900 | -1.96083200 |
| H | 4.53547100  | -2.23713800 | -4.14659500 |
| H | 5.29219600  | -3.31114800 | 0.40857100  |
| H | 1.16852600  | -4.23465600 | 4.53241900  |
| H | 3.65326800  | -4.26182600 | 4.75510100  |
| H | 5.07358900  | -3.81318400 | 2.79049000  |
| C | -2.61525200 | 4.70577600  | -1.86452000 |

|   |             |             |             |
|---|-------------|-------------|-------------|
| C | -2.93234200 | 3.47803200  | -1.36138100 |
| C | -3.28734900 | 3.30525100  | 0.01885500  |
| C | -3.25302800 | 4.47026400  | 0.85963300  |
| C | -2.91342600 | 5.73973500  | 0.29081100  |
| C | -2.61359100 | 5.86188900  | -1.03043400 |
| C | -3.65239200 | 2.05618000  | 0.56843100  |
| C | -3.54718000 | 4.34851600  | 2.21547800  |
| C | -3.90380600 | 3.12187300  | 2.77373200  |
| C | -3.97317700 | 1.95547000  | 1.93921000  |
| C | -4.40236800 | 0.72920800  | 2.54318200  |
| H | -4.48129600 | -0.15902500 | 1.92768700  |
| C | -4.71018600 | 0.66479200  | 3.86892300  |
| C | -4.61499600 | 1.82010300  | 4.69770300  |
| C | -4.22677700 | 3.00988300  | 4.16296500  |
| H | -2.34723800 | 4.80497600  | -2.91268700 |
| H | -2.91129100 | 2.60784600  | -2.00787400 |
| H | -2.89153800 | 6.60501600  | 0.94773300  |
| H | -2.34856900 | 6.82754800  | -1.44813700 |
| H | -3.50947500 | 5.23188600  | 2.84938900  |
| H | -5.03013600 | -0.27710600 | 4.30244800  |
| H | -4.85906100 | 1.74579500  | 5.75264000  |
| H | -4.15895100 | 3.90269800  | 4.77858700  |
| C | 7.59179000  | 0.84838900  | -2.74714000 |
| C | 6.74859000  | 1.86415900  | -3.15999300 |
| C | 5.46135400  | 1.98351900  | -2.61474000 |
| C | 5.02000900  | 1.06328300  | -1.64632400 |
| C | 5.88803700  | 0.05257200  | -1.22262600 |
| C | 7.15674700  | -0.05443800 | -1.77141800 |
| H | 4.97487200  | 3.79325200  | -3.71482500 |
| H | 8.58591800  | 0.75724700  | -3.17045600 |
| H | 7.07492300  | 2.58312100  | -3.90607000 |
| C | 4.58680700  | 3.06891900  | -3.00282600 |
| C | 3.67254100  | 1.22375600  | -1.06526200 |
| H | 5.54948500  | -0.64868000 | -0.46488700 |
| H | 7.81848900  | -0.84708500 | -1.43658700 |
| C | 2.78028500  | 2.27022800  | -1.59204000 |
| C | 3.33462900  | 3.22883100  | -2.52369400 |
| H | 2.73324500  | 4.07471600  | -2.82939500 |
| C | 3.27779700  | 0.49007800  | -0.02870100 |
| C | 2.94687000  | -0.20486700 | 1.02086800  |
| C | 3.36735400  | 0.09652400  | 2.40514900  |
| C | 4.40537900  | 0.99674600  | 2.67041800  |
| C | 2.74776500  | -0.58384100 | 3.45591000  |
| C | 4.81494400  | 1.22045900  | 3.97726200  |

|   |             |             |             |
|---|-------------|-------------|-------------|
| H | 4.89682400  | 1.50896700  | 1.84696200  |
| C | 3.16993900  | -0.35934400 | 4.76253400  |
| H | 1.92100400  | -1.25125100 | 3.23358100  |
| C | 4.19874100  | 0.53935000  | 5.02669200  |
| H | 5.62110100  | 1.91858800  | 4.17863700  |
| H | 2.68758200  | -0.89114600 | 5.57667700  |
| H | 4.52493600  | 0.70960500  | 6.04798400  |
| N | 1.53165400  | 2.30164500  | -1.23186900 |
| C | 0.53336100  | 3.28728600  | -1.64728000 |
| H | 0.68198700  | 3.56095800  | -2.69512000 |
| H | -0.42205300 | 2.76697500  | -1.55605300 |
| C | 0.53997200  | 4.50307000  | -0.74866100 |
| C | 0.23694500  | 4.34547300  | 0.60657300  |
| C | 0.82456800  | 5.77036600  | -1.25284700 |
| C | 0.23164100  | 5.45478200  | 1.44441200  |
| H | -0.00387200 | 3.35350300  | 0.98482000  |
| C | 0.81394600  | 6.88061900  | -0.41096500 |
| H | 1.03891500  | 5.89581200  | -2.31242700 |
| C | 0.51987500  | 6.72193500  | 0.93910000  |
| H | -0.01382600 | 5.33026500  | 2.49453400  |
| H | 1.03388900  | 7.86545400  | -0.81088500 |
| H | 0.51119300  | 7.58517800  | 1.59728900  |
| H | 2.30558900  | -1.07812300 | 0.87713200  |
| H | 1.09289900  | 1.60237200  | -0.55700700 |

**COM1B**

|   |             |             |             |
|---|-------------|-------------|-------------|
| P | 0.86847200  | -0.43099000 | -0.11418200 |
| O | 2.12958900  | -0.33581300 | 0.88317100  |
| O | 0.74019900  | 1.08052900  | -0.67008900 |
| O | -0.33498800 | -0.99610400 | 0.51066100  |
| C | 3.30276400  | 0.12202000  | 0.28167400  |
| C | 3.41557200  | 1.48225800  | 0.00349400  |
| C | 4.28807500  | -0.80775600 | -0.05119000 |
| C | 5.40909000  | -0.31618900 | -0.71348000 |
| C | 5.52557800  | 1.02263800  | -1.09606400 |
| H | 6.20264200  | -1.01269500 | -0.97463000 |
| C | 1.02029500  | 2.14779200  | 0.17879300  |
| C | 2.35333900  | 2.39479300  | 0.51958600  |
| C | -0.03056600 | 2.94275100  | 0.64074100  |
| C | 0.31545300  | 4.02958800  | 1.44340300  |
| C | 1.62297200  | 4.28099200  | 1.85379100  |
| H | -0.48276500 | 4.67716800  | 1.79842400  |
| C | 2.65468200  | 3.43331400  | 1.42406900  |
| C | 4.04577000  | 3.56430800  | 2.02083700  |

|   |            |             |             |
|---|------------|-------------|-------------|
| C | 4.31947000 | 4.94252100  | 2.61700600  |
| H | 4.41223300 | 5.68233900  | 1.81057600  |
| C | 3.18320000 | 5.35043300  | 3.54890100  |
| H | 3.40463100 | 6.29801200  | 4.04861700  |
| C | 1.88500700 | 5.47115500  | 2.75640200  |
| H | 1.03199600 | 5.60934300  | 3.42846500  |
| H | 4.12944900 | 2.80815100  | 2.81499000  |
| C | 4.51383800 | 1.93250300  | -0.75764100 |
| C | 4.54686400 | 3.35338800  | -1.29144000 |
| C | 5.94640200 | 3.80925200  | -1.69435900 |
| H | 6.56510000 | 3.94501800  | -0.79701400 |
| C | 6.59376300 | 2.76927800  | -2.60366400 |
| H | 7.56230600 | 3.11792600  | -2.97379000 |
| C | 6.76983600 | 1.45499400  | -1.84816400 |
| H | 7.58808500 | 1.56711400  | -1.12391400 |
| H | 3.89257900 | 3.38490400  | -2.17425100 |
| H | 1.93194200 | 6.37404900  | 2.13252100  |
| H | 3.07024200 | 4.59127000  | 4.33303200  |
| H | 5.27600200 | 4.92756400  | 3.14769000  |
| H | 4.81714900 | 3.30598000  | 1.29387600  |
| H | 4.10440700 | 4.05136300  | -0.57780700 |
| H | 5.88730700 | 4.78190900  | -2.19146200 |
| H | 5.95287700 | 2.61026400  | -3.47996600 |
| H | 7.07581400 | 0.65538100  | -2.53054300 |
| O | 1.46729600 | -1.19475100 | -1.36148200 |
| H | 0.84747800 | -1.79034800 | -1.81610200 |
| C | 4.18349100 | -2.15744900 | 4.01478700  |
| C | 4.21082800 | -1.73104700 | 2.72085200  |
| C | 4.12030000 | -2.65855000 | 1.63250700  |
| C | 4.02013700 | -4.05506400 | 1.95037200  |
| C | 3.99347700 | -4.46069000 | 3.32204200  |
| C | 4.06856200 | -3.54367600 | 4.32497100  |
| C | 4.14310000 | -2.25218900 | 0.28203100  |
| C | 3.96285100 | -4.99203600 | 0.91994200  |
| C | 3.98609800 | -4.60388500 | -0.41815300 |
| C | 4.06298700 | -3.20801100 | -0.75159200 |
| C | 4.03815100 | -2.85022300 | -2.14063300 |
| H | 4.03448200 | -1.79981400 | -2.41005100 |
| C | 3.99792300 | -3.80751600 | -3.11123000 |
| C | 3.95255100 | -5.19267900 | -2.77594400 |
| C | 3.93465800 | -5.57354200 | -1.46929800 |
| H | 4.25112500 | -1.43527100 | 4.82189300  |
| H | 4.30642200 | -0.67288600 | 2.50409400  |
| H | 3.91181000 | -5.52149700 | 3.54169900  |



|   |             |             |             |
|---|-------------|-------------|-------------|
| H | 4.04581100  | -3.86112700 | 5.36227400  |
| H | 3.89928200  | -6.04960000 | 1.16575400  |
| H | 3.99476500  | -3.51609500 | -4.15722300 |
| H | 3.92300400  | -5.93603000 | -3.56605100 |
| H | 3.88433900  | -6.62380200 | -1.19595300 |
| C | -2.76851800 | 2.16632600  | 3.83856800  |
| C | -1.88629700 | 2.31438300  | 2.80811400  |
| C | -2.33700300 | 2.41567800  | 1.44905000  |
| C | -3.74523100 | 2.26669000  | 1.20659700  |
| C | -4.63782500 | 2.11467700  | 2.31551600  |
| C | -4.17102600 | 2.08737700  | 3.59560600  |
| C | -1.46544900 | 2.65578100  | 0.36230900  |
| C | -4.22508800 | 2.28084400  | -0.10221000 |
| C | -3.37084600 | 2.49094200  | -1.18296700 |
| C | -1.97077100 | 2.70950600  | -0.95218100 |
| C | -1.14961000 | 3.02226700  | -2.08376000 |
| H | -0.09629900 | 3.22916200  | -1.92799700 |
| C | -1.67645500 | 3.07826300  | -3.34105300 |
| C | -3.05712800 | 2.80408500  | -3.57079800 |
| C | -3.87692400 | 2.52196200  | -2.52098400 |
| H | -2.39876100 | 2.09651400  | 4.85671400  |
| H | -0.82273000 | 2.35266100  | 3.01313700  |
| H | -5.69893800 | 2.01979600  | 2.10348400  |
| H | -4.85727800 | 1.98222700  | 4.42982800  |
| H | -5.28732100 | 2.12578500  | -0.28420800 |
| H | -1.03675800 | 3.33066300  | -4.18185600 |
| H | -3.44955300 | 2.83192100  | -4.58213500 |
| H | -4.93367800 | 2.32038000  | -2.67380200 |
| C | -8.20916000 | 0.31652500  | -3.00686400 |
| C | -8.12158300 | 0.13568300  | -1.64981900 |
| C | -6.89834600 | -0.24139500 | -1.04260100 |
| C | -5.74607300 | -0.43795700 | -1.85198800 |
| C | -5.86551800 | -0.24907400 | -3.25490100 |
| C | -7.06389500 | 0.12010000  | -3.81334800 |
| H | -7.66006500 | -0.29623700 | 0.98205200  |
| H | -9.14926300 | 0.60802700  | -3.46301500 |
| H | -8.99208700 | 0.28143400  | -1.01526100 |
| C | -6.77718700 | -0.42898500 | 0.36151600  |
| C | -4.50915600 | -0.79468800 | -1.23711800 |
| H | -4.98472400 | -0.39223300 | -3.87363700 |
| H | -7.13474000 | 0.26309400  | -4.88728700 |
| C | -4.40851800 | -0.93931100 | 0.15590400  |
| C | -5.58904600 | -0.76869300 | 0.94372900  |
| H | -5.52961200 | -0.90442300 | 2.01781000  |

|   |             |             |             |
|---|-------------|-------------|-------------|
| C | -3.32899100 | -0.96948700 | -2.01490600 |
| C | -2.28527800 | -1.14229000 | -2.60928400 |
| C | -1.05139400 | -1.36671000 | -3.29981600 |
| C | -0.51315200 | -2.66375800 | -3.38778000 |
| C | -0.34670900 | -0.29247600 | -3.86198800 |
| C | 0.70877400  | -2.87225600 | -4.02215500 |
| H | -1.05977600 | -3.49197100 | -2.94936500 |
| C | 0.86584100  | -0.51309900 | -4.50394100 |
| H | -0.75533200 | 0.70682400  | -3.76321600 |
| C | 1.39726100  | -1.79723100 | -4.58363800 |
| H | 1.12917800  | -3.87183200 | -4.06674200 |
| H | 1.40811100  | 0.32572300  | -4.92776200 |
| H | 2.35028900  | -1.96036100 | -5.07588300 |
| N | -3.21344000 | -1.22882600 | 0.73883200  |
| H | -2.37898800 | -1.16191700 | 0.16683800  |
| C | -2.98632000 | -1.17429000 | 2.16497800  |
| H | -1.90027600 | -1.16106500 | 2.29319900  |
| H | -3.36834900 | -0.23547400 | 2.58591000  |
| C | -3.57698100 | -2.33794600 | 2.93933100  |
| C | -3.78823000 | -3.58039600 | 2.34279800  |
| C | -3.90466300 | -2.16978600 | 4.28596200  |
| C | -4.30761100 | -4.63812300 | 3.08351700  |
| H | -3.54786100 | -3.70316700 | 1.29106400  |
| C | -4.42036700 | -3.22678100 | 5.02924200  |
| H | -3.75497800 | -1.19723800 | 4.75046900  |
| C | -4.62336500 | -4.46626000 | 4.42847600  |
| H | -4.46980800 | -5.60036500 | 2.60737300  |
| H | -4.67146300 | -3.08096000 | 6.07539900  |
| H | -5.03133200 | -5.29124600 | 5.00381300  |

### TS1B

Value of imaginary frequency = -1215.02 cm<sup>-1</sup>

|   |             |             |             |
|---|-------------|-------------|-------------|
| P | -0.71911900 | 0.21092200  | 0.16144400  |
| O | -2.15500000 | 0.26929300  | 0.92425500  |
| O | -0.82654500 | -1.21850400 | -0.62634300 |
| O | 0.36001600  | 0.23024700  | 1.18181400  |
| C | -3.26405900 | -0.03107000 | 0.15410500  |
| C | -3.53010000 | -1.36987400 | -0.14046000 |
| C | -4.06435800 | 1.01146900  | -0.31226100 |
| C | -5.15388400 | 0.66654500  | -1.10712900 |
| C | -5.41981100 | -0.65169300 | -1.47976400 |
| H | -5.79624500 | 1.46217200  | -1.47788600 |
| C | -1.25344900 | -2.31706700 | 0.08751700  |
| C | -2.61172100 | -2.41598500 | 0.40095600  |

|   |             |             |             |
|---|-------------|-------------|-------------|
| C | -0.33048100 | -3.30786700 | 0.43350000  |
| C | -0.82072900 | -4.39748700 | 1.15213600  |
| C | -2.14814600 | -4.48407000 | 1.57351400  |
| H | -0.13004600 | -5.19445600 | 1.41890400  |
| C | -3.05452400 | -3.47429000 | 1.21754200  |
| C | -4.46293900 | -3.47075300 | 1.78415000  |
| C | -4.92401900 | -4.84773500 | 2.25367800  |
| H | -5.08845200 | -5.50003200 | 1.38527800  |
| C | -3.86890400 | -5.47173600 | 3.16207900  |
| H | -4.21990000 | -6.41999600 | 3.58004700  |
| C | -2.57686600 | -5.69480800 | 2.38090800  |
| H | -1.76472600 | -5.98720200 | 3.05462600  |
| H | -4.46764600 | -2.78125400 | 2.64042100  |
| C | -4.58915500 | -1.68338100 | -1.01704300 |
| C | -4.75178800 | -3.09459500 | -1.55582900 |
| C | -6.13582700 | -3.36215400 | -2.14080200 |
| H | -6.87692400 | -3.40673500 | -1.33137400 |
| C | -6.51969800 | -2.25396800 | -3.11583500 |
| H | -7.47081300 | -2.47515900 | -3.60938500 |
| C | -6.61486200 | -0.92461000 | -2.37308700 |
| H | -7.52025200 | -0.92992500 | -1.75075200 |
| H | -3.99733000 | -3.23062200 | -2.34425600 |
| H | -2.71976800 | -6.53835900 | 1.69173700  |
| H | -3.67951500 | -4.79789200 | 4.00714500  |
| H | -5.88355200 | -4.75805800 | 2.77171400  |
| H | -5.17236200 | -3.04925800 | 1.06890800  |
| H | -4.51093700 | -3.83902200 | -0.79498700 |
| H | -6.14287300 | -4.33887900 | -2.63392800 |
| H | -5.75672900 | -2.18579900 | -3.90152500 |
| H | -6.73512400 | -0.09563800 | -3.07808700 |
| O | -0.71667300 | 1.23275600  | -0.97349100 |
| H | 0.44387800  | 1.65651000  | -1.22253900 |
| C | -4.59234300 | 2.60076300  | 3.63661900  |
| C | -4.39445800 | 2.09249100  | 2.38773300  |
| C | -3.98834500 | 2.93457900  | 1.30261700  |
| C | -3.80856900 | 4.33465000  | 1.56644800  |
| C | -4.02924100 | 4.82731400  | 2.89118500  |
| C | -4.40644300 | 3.98998600  | 3.89624700  |
| C | -3.77551600 | 2.43980700  | 0.00100700  |
| C | -3.44095600 | 5.18914800  | 0.52725800  |
| C | -3.21007400 | 4.70819600  | -0.76106800 |
| C | -3.35473700 | 3.30386500  | -1.02879800 |
| C | -3.02710300 | 2.83106400  | -2.34239800 |
| H | -3.06659900 | 1.76527500  | -2.53483900 |

|   |             |             |             |
|---|-------------|-------------|-------------|
| C | -2.62456000 | 3.69307600  | -3.31840600 |
| C | -2.53117500 | 5.09290100  | -3.06352200 |
| C | -2.81495100 | 5.58155600  | -1.82488200 |
| H | -4.89416700 | 1.94363300  | 4.44577200  |
| H | -4.53940100 | 1.03389100  | 2.20185200  |
| H | -3.88673700 | 5.88873000  | 3.07457800  |
| H | -4.56906100 | 4.37431200  | 4.89803400  |
| H | -3.33027000 | 6.25311000  | 0.72699000  |
| H | -2.36109300 | 3.31198400  | -4.29951000 |
| H | -2.21973300 | 5.76319300  | -3.85805100 |
| H | -2.73631300 | 6.64524200  | -1.61502400 |
| C | 2.76773200  | -3.42920500 | 3.40097900  |
| C | 1.79064100  | -3.28651400 | 2.45900500  |
| C | 2.10022000  | -3.28172700 | 1.05777400  |
| C | 3.48637900  | -3.33741100 | 0.68468500  |
| C | 4.48175900  | -3.48468700 | 1.70316000  |
| C | 4.13622000  | -3.55407400 | 3.02020400  |
| C | 1.10765500  | -3.22356200 | 0.05313800  |
| C | 3.84115600  | -3.24784100 | -0.66082500 |
| C | 2.87604600  | -3.13360900 | -1.65950200 |
| C | 1.48312300  | -3.15653900 | -1.30665700 |
| C | 0.52948300  | -3.13723300 | -2.37671100 |
| H | -0.52649300 | -3.19874200 | -2.14271800 |
| C | 0.92834000  | -3.04130200 | -3.67597200 |
| C | 2.31066700  | -2.96017200 | -4.01429100 |
| C | 3.25408100  | -3.01388200 | -3.03520700 |
| H | 2.50469900  | -3.43389100 | 4.45388500  |
| H | 0.75805500  | -3.16457600 | 2.76507500  |
| H | 5.52213600  | -3.55010700 | 1.39468700  |
| H | 4.89794200  | -3.68158800 | 3.78307300  |
| H | 4.89207500  | -3.27157900 | -0.93994300 |
| H | 0.18474300  | -3.02158400 | -4.46607700 |
| H | 2.60613300  | -2.85867200 | -5.05369100 |
| H | 4.31331200  | -2.95180200 | -3.27507300 |
| C | 6.12803000  | -0.70585800 | -4.44374500 |
| C | 6.53486100  | -0.88984200 | -3.13778900 |
| C | 5.70732900  | -0.49534800 | -2.06916100 |
| C | 4.45089300  | 0.09301100  | -2.33599900 |
| C | 4.06080200  | 0.29208100  | -3.67031500 |
| C | 4.88512800  | -0.10610300 | -4.70483500 |
| H | 7.11954700  | -1.04450200 | -0.51407000 |
| H | 6.76504600  | -1.01734100 | -5.26438500 |
| H | 7.49882900  | -1.34107000 | -2.91819800 |
| C | 6.11657300  | -0.66651900 | -0.69924800 |

|   |             |             |             |
|---|-------------|-------------|-------------|
| C | 3.60483000  | 0.47192900  | -1.21577300 |
| H | 3.09140800  | 0.73747500  | -3.87167300 |
| H | 4.56411600  | 0.03961100  | -5.73140500 |
| C | 3.95524700  | 0.04924700  | 0.11732100  |
| C | 5.30202200  | -0.40751300 | 0.35275800  |
| H | 5.63589700  | -0.57329900 | 1.37028200  |
| C | 2.59525700  | 1.38379700  | -1.32088300 |
| C | 1.64779400  | 2.22369900  | -1.24264300 |
| C | 1.61712400  | 3.66404700  | -0.94277400 |
| C | 2.80744700  | 4.38285900  | -0.75609500 |
| C | 0.38962000  | 4.31324000  | -0.78075700 |
| C | 2.76846300  | 5.72682400  | -0.41274200 |
| H | 3.75868200  | 3.87142500  | -0.87673300 |
| C | 0.35826600  | 5.65926500  | -0.42733200 |
| H | -0.53334500 | 3.75480400  | -0.91734200 |
| C | 1.54104100  | 6.36760700  | -0.24404200 |
| H | 3.69480800  | 6.27523400  | -0.27207600 |
| H | -0.60036100 | 6.14762300  | -0.28679700 |
| H | 1.51004000  | 7.41676900  | 0.03255500  |
| N | 3.06047500  | 0.11071300  | 1.08494700  |
| H | 2.07258700  | 0.30036500  | 0.85884100  |
| C | 3.34010100  | -0.02829200 | 2.50284500  |
| H | 2.36036500  | -0.11683200 | 2.98111500  |
| H | 3.87836500  | -0.96173500 | 2.69348900  |
| C | 4.10664900  | 1.15881200  | 3.05174300  |
| C | 3.81251600  | 2.45084900  | 2.60914700  |
| C | 5.10710900  | 0.97578600  | 4.00463000  |
| C | 4.50806600  | 3.54133000  | 3.11773100  |
| H | 3.03732800  | 2.59867200  | 1.86051400  |
| C | 5.80222200  | 2.06858500  | 4.51730000  |
| H | 5.34476300  | -0.02987000 | 4.34463200  |
| C | 5.50445700  | 3.35296100  | 4.07366700  |
| H | 4.27018300  | 4.53957900  | 2.76367100  |
| H | 6.58195000  | 1.91434900  | 5.25640100  |
| H | 6.04959900  | 4.20457600  | 4.46772000  |

#### IM1B

|   |             |             |             |
|---|-------------|-------------|-------------|
| P | -0.77892000 | 0.30719100  | -0.11613600 |
| O | -2.17006900 | 0.11658800  | 0.74255800  |
| O | -0.65128800 | -1.19819800 | -0.80308200 |
| O | 0.31147200  | 0.46922800  | 0.90491800  |
| C | -3.24900300 | -0.20795400 | -0.05013500 |
| C | -3.38948200 | -1.53247300 | -0.46623300 |
| C | -4.13960100 | 0.79382800  | -0.44083000 |

|   |             |             |             |
|---|-------------|-------------|-------------|
| C | -5.17121100 | 0.42780400  | -1.29906200 |
| C | -5.29813300 | -0.86836000 | -1.80422500 |
| H | -5.88008700 | 1.19069400  | -1.61388200 |
| C | -1.05412800 | -2.31971800 | -0.12948400 |
| C | -2.42439800 | -2.53849400 | 0.06850400  |
| C | -0.09743500 | -3.25381400 | 0.28800500  |
| C | -0.56373500 | -4.40680600 | 0.92022400  |
| C | -1.91044200 | -4.61512400 | 1.20923500  |
| H | 0.16227400  | -5.15591600 | 1.22905300  |
| C | -2.85344100 | -3.65640000 | 0.80968500  |
| C | -4.29881300 | -3.77396800 | 1.26197500  |
| C | -4.69497600 | -5.19498800 | 1.65337500  |
| H | -4.74793400 | -5.82519000 | 0.75515800  |
| C | -3.67076100 | -5.78077000 | 2.62022000  |
| H | -3.98554700 | -6.76524800 | 2.97954500  |
| C | -2.31316000 | -5.88676400 | 1.93158200  |
| H | -1.53452100 | -6.15663600 | 2.65277200  |
| H | -4.41978400 | -3.11557300 | 2.13441000  |
| C | -4.39109500 | -1.85943800 | -1.40314000 |
| C | -4.41387700 | -3.23023700 | -2.05723800 |
| C | -5.75339700 | -3.56457100 | -2.70770500 |
| H | -6.51010900 | -3.73548800 | -1.92991700 |
| C | -6.20329600 | -2.41563500 | -3.60463000 |
| H | -7.11608700 | -2.67496600 | -4.14972800 |
| C | -6.43578000 | -1.16412200 | -2.76318400 |
| H | -7.35871000 | -1.29463900 | -2.18133000 |
| H | -3.62990200 | -3.23813800 | -2.82809800 |
| H | -2.34981700 | -6.70685800 | 1.20131400  |
| H | -3.59116200 | -5.12728000 | 3.49819000  |
| H | -5.69493100 | -5.18866300 | 2.09776900  |
| H | -4.98208400 | -3.38091500 | 0.50718000  |
| H | -4.12905700 | -4.00984700 | -1.34779600 |
| H | -5.66461400 | -4.49519100 | -3.27661300 |
| H | -5.42526700 | -2.21924100 | -4.35315000 |
| H | -6.60239400 | -0.29321200 | -3.40571600 |
| O | -0.96630000 | 1.25330900  | -1.24746600 |
| H | 0.92915800  | 1.46822000  | -2.06936900 |
| C | -4.87832500 | 1.83992500  | 3.64601500  |
| C | -4.61845800 | 1.50864100  | 2.34972900  |
| C | -4.26912800 | 2.50854500  | 1.38533600  |
| C | -4.21259700 | 3.87460800  | 1.82365100  |
| C | -4.49382500 | 4.17951400  | 3.19278000  |
| C | -4.81428300 | 3.19647700  | 4.07853600  |
| C | -3.99570400 | 2.19759500  | 0.03799100  |

|   |             |             |             |
|---|-------------|-------------|-------------|
| C | -3.89932600 | 4.87839400  | 0.90785500  |
| C | -3.61114900 | 4.58141600  | -0.42273800 |
| C | -3.63977300 | 3.21566600  | -0.86725900 |
| C | -3.27339900 | 2.93932000  | -2.22586000 |
| H | -3.21116800 | 1.90539500  | -2.54330200 |
| C | -2.94855700 | 3.94813500  | -3.08309600 |
| C | -2.96548200 | 5.30773500  | -2.65103700 |
| C | -3.28118900 | 5.61123400  | -1.36110400 |
| H | -5.13601400 | 1.06469200  | 4.36049600  |
| H | -4.67086400 | 0.47284800  | 2.03275600  |
| H | -4.44371300 | 5.21830300  | 3.50776900  |
| H | -5.02375000 | 3.43928400  | 5.11543400  |
| H | -3.87396000 | 5.91378200  | 1.24060100  |
| H | -2.65650100 | 3.71767900  | -4.10244000 |
| H | -2.70984000 | 6.09621900  | -3.35221400 |
| H | -3.28273700 | 6.64175200  | -1.01487200 |
| C | 2.58194200  | -3.27458200 | 3.63542600  |
| C | 1.73233600  | -3.17854300 | 2.57146000  |
| C | 2.22423100  | -3.10848100 | 1.22473600  |
| C | 3.64927600  | -3.07826300 | 1.04158600  |
| C | 4.50682700  | -3.17668900 | 2.18386200  |
| C | 3.99388900  | -3.29025700 | 3.44216000  |
| C | 1.36862900  | -3.06329000 | 0.09667500  |
| C | 4.17588200  | -2.94715900 | -0.24331100 |
| C | 3.34625900  | -2.86419200 | -1.36039200 |
| C | 1.91988000  | -2.93754200 | -1.19725200 |
| C | 1.11371500  | -2.91607200 | -2.38273400 |
| H | 0.03847800  | -3.00044300 | -2.28842200 |
| C | 1.67736200  | -2.78263200 | -3.61603300 |
| C | 3.09102700  | -2.67556000 | -3.76782500 |
| C | 3.89869000  | -2.72656400 | -2.67365200 |
| H | 2.18064400  | -3.32504800 | 4.64239100  |
| H | 0.66213900  | -3.13966900 | 2.73764300  |
| H | 5.58115100  | -3.16914900 | 2.01793300  |
| H | 4.65389400  | -3.37852300 | 4.29927700  |
| H | 5.25514000  | -2.91980300 | -0.38052400 |
| H | 1.04411200  | -2.76006000 | -4.49680800 |
| H | 3.51932600  | -2.56296200 | -4.75899100 |
| H | 4.97935800  | -2.65452000 | -2.77152600 |
| C | 7.41048000  | -0.35786800 | -3.30735800 |
| C | 7.45149800  | -0.43126900 | -1.92534700 |
| C | 6.31096100  | -0.13321000 | -1.16472500 |
| C | 5.11788600  | 0.23817200  | -1.81199500 |
| C | 5.09157700  | 0.32461000  | -3.20636200 |

|           |             |             |             |
|-----------|-------------|-------------|-------------|
| C         | 6.22689000  | 0.02818600  | -3.94537300 |
| H         | 7.29688700  | -0.39605000 | 0.75746100  |
| H         | 8.29275300  | -0.59383600 | -3.89204400 |
| H         | 8.36746300  | -0.71752500 | -1.41615000 |
| C         | 6.34019800  | -0.18814100 | 0.28407200  |
| C         | 3.93150900  | 0.53446400  | -0.99309300 |
| H         | 4.16524500  | 0.60236900  | -3.69957900 |
| H         | 6.19246600  | 0.08926000  | -5.02817900 |
| C         | 3.95566300  | 0.21223500  | 0.44370800  |
| C         | 5.24796700  | -0.01781200 | 1.05858100  |
| H         | 5.31496300  | -0.08506500 | 2.13687400  |
| C         | 2.88594300  | 1.21472100  | -1.45199900 |
| C         | 1.85514100  | 1.95359700  | -1.74549700 |
| C         | 1.80832300  | 3.42016600  | -1.55270000 |
| C         | 2.97705500  | 4.17512700  | -1.40288100 |
| C         | 0.55867700  | 4.04467000  | -1.48586700 |
| C         | 2.89836600  | 5.54247300  | -1.18031100 |
| H         | 3.94476900  | 3.68473400  | -1.46888600 |
| C         | 0.48994000  | 5.41696200  | -1.26032900 |
| H         | -0.34111900 | 3.44105400  | -1.58125100 |
| C         | 1.65302300  | 6.16551500  | -1.10719500 |
| H         | 3.80757100  | 6.12405600  | -1.06615100 |
| H         | -0.48288100 | 5.89424100  | -1.20416200 |
| H         | 1.59243500  | 7.23531400  | -0.93298900 |
| N         | 2.84925500  | 0.18117500  | 1.12250000  |
| H         | 1.89693000  | 0.31833900  | 0.68434000  |
| C         | 2.73892200  | 0.09377700  | 2.57961100  |
| H         | 1.71539300  | -0.24124300 | 2.75992500  |
| H         | 3.42288500  | -0.66645000 | 2.96466100  |
| C         | 2.98225600  | 1.45127200  | 3.20213000  |
| C         | 2.22190300  | 2.54208200  | 2.76815500  |
| C         | 3.96370700  | 1.63489800  | 4.17271600  |
| C         | 2.45654700  | 3.80412500  | 3.29913500  |
| H         | 1.44779600  | 2.38533700  | 2.01914000  |
| C         | 4.18985300  | 2.90041000  | 4.71150500  |
| H         | 4.54993000  | 0.78457400  | 4.51478000  |
| C         | 3.44042000  | 3.98545200  | 4.27096100  |
| H         | 1.86962600  | 4.64838200  | 2.95183400  |
| H         | 4.95515900  | 3.03651900  | 5.46894600  |
| H         | 3.62136200  | 4.97285600  | 4.68361300  |
| <b>R2</b> |             |             |             |
| C         | -1.96597400 | 1.61692000  | -0.00003700 |
| C         | -1.67281800 | 0.24096800  | 0.00013900  |



|   |             |             |             |
|---|-------------|-------------|-------------|
| C | -0.36347200 | -0.17723800 | 0.00021000  |
| C | 0.69813600  | 0.74996600  | 0.00013300  |
| C | 0.40390900  | 2.14536500  | -0.00000900 |
| C | -0.95748800 | 2.54468800  | -0.00011200 |
| H | -3.00162100 | 1.94357400  | -0.00008200 |
| H | -0.15818800 | -1.24019300 | 0.00035300  |
| H | -1.18750800 | 3.60547100  | -0.00022000 |
| N | 1.36660600  | 3.08726300  | -0.00003000 |
| H | 2.33779200  | 2.81383400  | 0.00009700  |
| H | 1.11304600  | 4.06048300  | -0.00030100 |
| C | -2.80586700 | -0.73483600 | 0.00002300  |
| F | -3.59750500 | -0.57377100 | 1.07387500  |
| F | -3.59585300 | -0.57549100 | -1.07530200 |
| F | -2.38019200 | -2.00501600 | 0.00133400  |
| C | 2.08899600  | 0.30474200  | 0.00018100  |
| O | 3.06593700  | 1.03263900  | 0.00019100  |
| C | 2.37166200  | -1.21738900 | -0.00005900 |
| F | 1.83968400  | -1.80259200 | 1.08270000  |
| F | 3.67447600  | -1.45125900 | -0.00024500 |
| F | 1.83941500  | -1.80234000 | -1.08280400 |

#### IM2-I

|   |            |             |             |
|---|------------|-------------|-------------|
| P | 1.34225600 | 0.32397200  | 0.67091600  |
| O | 1.49924100 | 1.27710200  | -0.67691200 |
| O | 2.80983100 | 0.51828700  | 1.37033200  |
| O | 1.16529900 | -1.06250600 | 0.13505900  |
| C | 1.90193800 | 2.57880600  | -0.47694600 |
| C | 3.23664100 | 2.81875400  | -0.13636700 |
| C | 0.98687800 | 3.62238300  | -0.66224700 |
| C | 1.44130700 | 4.91481600  | -0.40764500 |
| C | 2.72726300 | 5.17898100  | 0.06551100  |
| H | 0.75357700 | 5.74428000  | -0.55815200 |
| C | 3.91769300 | 0.52144900  | 0.54993000  |
| C | 4.18817700 | 1.66928800  | -0.20201300 |
| C | 4.73325900 | -0.60826800 | 0.49250800  |
| C | 5.85255100 | -0.54545200 | -0.33417300 |
| C | 6.13365800 | 0.56103800  | -1.13391300 |
| H | 6.50233100 | -1.41606600 | -0.38759900 |
| C | 5.27658400 | 1.67135400  | -1.09900000 |
| C | 5.45065700 | 2.79722200  | -2.10540400 |
| C | 6.85180600 | 2.86185600  | -2.70747700 |
| H | 7.56365600 | 3.21196400  | -1.94779100 |
| C | 7.28084100 | 1.48464800  | -3.20206000 |
| H | 8.24670900 | 1.53253600  | -3.71400500 |

|   |             |             |             |
|---|-------------|-------------|-------------|
| C | 7.36142600  | 0.51978600  | -2.02315200 |
| H | 7.51959300  | -0.50578400 | -2.37226000 |
| H | 4.72228000  | 2.62918400  | -2.91232000 |
| C | 3.63596500  | 4.12239200  | 0.21745900  |
| C | 5.00207400  | 4.36428100  | 0.83357600  |
| C | 5.45073000  | 5.82028600  | 0.74393300  |
| H | 5.68486900  | 6.07346500  | -0.29916600 |
| C | 4.34433900  | 6.74049500  | 1.25101000  |
| H | 4.68010400  | 7.78141900  | 1.28139900  |
| C | 3.11453700  | 6.61689400  | 0.35561000  |
| H | 3.31780800  | 7.12158300  | -0.59886600 |
| H | 4.93880600  | 4.07433700  | 1.89191700  |
| H | 8.24104100  | 0.77516000  | -1.41636100 |
| H | 6.54678600  | 1.11889700  | -3.93125900 |
| H | 6.86735200  | 3.59413900  | -3.52045100 |
| H | 5.18302500  | 3.76243700  | -1.67319600 |
| H | 5.75070600  | 3.70074600  | 0.39508000  |
| H | 6.37064300  | 5.95892600  | 1.31991700  |
| H | 4.08464400  | 6.45580200  | 2.27842300  |
| H | 2.26087500  | 7.13961700  | 0.79964000  |
| O | 0.33937700  | 0.93984000  | 1.59799300  |
| C | 0.19390900  | 1.65829900  | -4.40337900 |
| C | 0.44268300  | 2.30472000  | -3.22881100 |
| C | -0.62630700 | 2.74384100  | -2.37919200 |
| C | -1.97042700 | 2.52675300  | -2.83744900 |
| C | -2.19040600 | 1.81429700  | -4.05992200 |
| C | -1.14361600 | 1.38903600  | -4.82093400 |
| C | -0.40437900 | 3.38111000  | -1.13685600 |
| C | -3.04230500 | 3.00114800  | -2.08104800 |
| C | -2.83990200 | 3.65230100  | -0.86598200 |
| C | -1.50306700 | 3.82011900  | -0.36371200 |
| C | -1.35317700 | 4.38761400  | 0.94557600  |
| H | -0.35932900 | 4.46042600  | 1.37155300  |
| C | -2.43739300 | 4.79501000  | 1.66615600  |
| C | -3.75892400 | 4.65313600  | 1.15013700  |
| C | -3.94952900 | 4.09040700  | -0.07478800 |
| H | 1.02270300  | 1.34840200  | -5.03259100 |
| H | 1.46558200  | 2.50056600  | -2.92916500 |
| H | -3.21604900 | 1.62017800  | -4.36009600 |
| H | -1.32050000 | 0.85606700  | -5.75000600 |
| H | -4.05848100 | 2.83693800  | -2.43516600 |
| H | -2.29688200 | 5.20811700  | 2.66010100  |
| H | -4.60936800 | 4.95080500  | 1.75521200  |
| H | -4.95081300 | 3.93425900  | -0.46835200 |

|   |             |             |             |
|---|-------------|-------------|-------------|
| C | 3.32326000  | -3.99854100 | -1.65540700 |
| C | 3.70172600  | -2.90021000 | -0.94417600 |
| C | 4.00324500  | -2.99210600 | 0.45478800  |
| C | 3.86347000  | -4.27049100 | 1.09394400  |
| C | 3.44724700  | -5.39617700 | 0.31358300  |
| C | 3.19387300  | -5.26837800 | -1.01770100 |
| C | 4.42841300  | -1.88092800 | 1.20756000  |
| C | 4.15944600  | -4.39593900 | 2.44976300  |
| C | 4.55810300  | -3.29710000 | 3.21018900  |
| C | 4.67018100  | -2.00829000 | 2.58838100  |
| C | 5.04139500  | -0.89369800 | 3.40698700  |
| H | 5.11375800  | 0.08677500  | 2.94802400  |
| C | 5.28722000  | -1.04987700 | 4.73956300  |
| C | 5.20078800  | -2.33632500 | 5.34990600  |
| C | 4.85050100  | -3.42261800 | 4.60509200  |
| H | 3.10148900  | -3.91142600 | -2.71504900 |
| H | 3.76682600  | -1.93221700 | -1.42820600 |
| H | 3.34405100  | -6.35614400 | 0.81222800  |
| H | 2.88498900  | -6.12802900 | -1.60463200 |
| H | 4.07117200  | -5.36983000 | 2.92679900  |
| H | 5.55699400  | -0.19035200 | 5.34466100  |
| H | 5.41517800  | -2.44272900 | 6.40854500  |
| H | 4.78236800  | -4.40866800 | 5.05793400  |
| C | -6.82360100 | -3.66990000 | -0.05355600 |
| C | -6.11523100 | -3.63835500 | -1.24043000 |
| C | -4.77010400 | -3.23668700 | -1.25415500 |
| C | -4.13458400 | -2.87390100 | -0.05091400 |
| C | -4.86830600 | -2.88816600 | 1.13963100  |
| C | -6.19725200 | -3.28175900 | 1.13571900  |
| H | -4.54288800 | -3.46794700 | -3.40108300 |
| H | -7.86348300 | -3.97695200 | -0.04628400 |
| H | -6.59218300 | -3.91400000 | -2.17656600 |
| C | -4.02300600 | -3.18239700 | -2.49019800 |
| C | -2.71294400 | -2.48979200 | -0.08223100 |
| H | -4.38523100 | -2.58317800 | 2.06323400  |
| H | -6.75546200 | -3.28488200 | 2.06602800  |
| C | -2.02248000 | -2.39030900 | -1.37807500 |
| C | -2.73356900 | -2.78527200 | -2.56888100 |
| H | -2.22146800 | -2.75362600 | -3.52209900 |
| C | -2.02138100 | -2.16859900 | 1.00877100  |
| C | -1.21560600 | -1.76144600 | 1.94626300  |
| C | -0.33339500 | -2.56416300 | 2.80749000  |
| C | -0.48804700 | -3.94470800 | 2.95487400  |
| C | 0.68974700  | -1.89652000 | 3.48840300  |

|   |             |             |             |
|---|-------------|-------------|-------------|
| C | 0.37550900  | -4.65157200 | 3.78179400  |
| H | -1.29046700 | -4.45544700 | 2.42911600  |
| C | 1.55116900  | -2.60869900 | 4.31199200  |
| H | 0.80742600  | -0.82468800 | 3.35024800  |
| C | 1.39255900  | -3.98424900 | 4.46166700  |
| H | 0.25334900  | -5.72357600 | 3.89908100  |
| H | 2.35841100  | -2.09358100 | 4.82388000  |
| H | 2.07006000  | -4.53677200 | 5.10597700  |
| N | -0.79713600 | -1.93509900 | -1.43343800 |
| C | -0.05623400 | -1.65679400 | -2.65464700 |
| H | -0.68302800 | -1.05048500 | -3.32149200 |
| H | 0.78308900  | -1.03009300 | -2.33631700 |
| C | 0.45557500  | -2.88515100 | -3.38277600 |
| C | 1.17067000  | -2.69130000 | -4.56772300 |
| C | 0.25391100  | -4.18302100 | -2.91856500 |
| C | 1.67541600  | -3.77524300 | -5.27566900 |
| H | 1.33495000  | -1.67965200 | -4.93109100 |
| C | 0.74754300  | -5.27182300 | -3.63579900 |
| H | -0.26990200 | -4.35228600 | -1.98341300 |
| C | 1.46109700  | -5.07300900 | -4.81209700 |
| H | 2.23323900  | -3.60915100 | -6.19155500 |
| H | 0.57835600  | -6.27745800 | -3.26397000 |
| H | 1.84916400  | -5.92091900 | -5.36668300 |
| H | -1.15279800 | -0.67574300 | 2.07426000  |
| H | -0.25814400 | -1.67251800 | -0.57648200 |
| C | -3.90966300 | 1.70743100  | 2.84327100  |
| C | -5.23262000 | 1.54921800  | 2.37474100  |
| C | -5.46010000 | 1.05343200  | 1.11550400  |
| C | -4.38482800 | 0.70903800  | 0.26579100  |
| C | -3.04715700 | 0.92195000  | 0.71764200  |
| C | -2.84379300 | 1.40319800  | 2.04398500  |
| H | -3.74217100 | 2.09621000  | 3.84373300  |
| H | -6.48227500 | 0.93815900  | 0.77793700  |
| H | -1.81897400 | 1.55737700  | 2.37105700  |
| N | -1.96572500 | 0.68177700  | -0.03757800 |
| H | -2.08037600 | 0.51967000  | -1.02765900 |
| H | -1.06987800 | 0.98276500  | 0.34437800  |
| C | -6.35754300 | 1.99184900  | 3.24928300  |
| F | -7.55708800 | 1.66845300  | 2.74526200  |
| F | -6.27879300 | 1.45357600  | 4.47883100  |
| F | -6.35236900 | 3.32815100  | 3.42803200  |
| C | -4.60936700 | 0.18622400  | -1.06881100 |
| O | -3.74467100 | -0.08307500 | -1.89142500 |
| C | -6.06483900 | -0.01002000 | -1.55197700 |

|   |             |             |             |
|---|-------------|-------------|-------------|
| F | -6.80334800 | -0.72208200 | -0.69150300 |
| F | -6.08971000 | -0.63656600 | -2.72336000 |
| F | -6.65709800 | 1.18667300  | -1.70374300 |

**IM2-I'**

|   |            |             |             |
|---|------------|-------------|-------------|
| P | 1.33265500 | -0.24328800 | -0.39582100 |
| O | 1.46130100 | -1.66540600 | 0.43792500  |
| O | 2.88363100 | -0.01629600 | -0.87803000 |
| O | 0.97038700 | 0.77492000  | 0.64808300  |
| C | 2.19739200 | -2.67716500 | -0.13982400 |
| C | 3.59104800 | -2.56698900 | -0.15076100 |
| C | 1.54195900 | -3.79453800 | -0.66199400 |
| C | 2.32909800 | -4.76613500 | -1.27489100 |
| C | 3.71315200 | -4.63849200 | -1.40179600 |
| H | 1.83757500 | -5.64431300 | -1.68804700 |
| C | 3.82357600 | -0.11999700 | 0.12688400  |
| C | 4.20215200 | -1.39603400 | 0.54488000  |
| C | 4.34787300 | 1.03869500  | 0.69876200  |
| C | 5.25757400 | 0.87711000  | 1.73965700  |
| C | 5.60859200 | -0.37999500 | 2.23620500  |
| H | 5.68531200 | 1.76643100  | 2.19743700  |
| C | 5.06606900 | -1.53287700 | 1.64925100  |
| C | 5.30863000 | -2.89822500 | 2.26839200  |
| C | 6.54170000 | -2.94173300 | 3.16678500  |
| H | 7.44948800 | -2.87638400 | 2.55200000  |
| C | 6.51640800 | -1.77799200 | 4.15269600  |
| H | 7.34592100 | -1.84521800 | 4.86309500  |
| C | 6.58668900 | -0.45638000 | 3.39306200  |
| H | 6.41287500 | 0.38718400  | 4.06916300  |
| H | 4.42040800 | -3.14952200 | 2.86606900  |
| C | 4.35647100 | -3.52435400 | -0.84357900 |
| C | 5.83969500 | -3.29545400 | -1.07431000 |
| C | 6.59124600 | -4.56732600 | -1.45765200 |
| H | 6.65835800 | -5.23433300 | -0.58754300 |
| C | 5.86308300 | -5.28653800 | -2.58904500 |
| H | 6.43550100 | -6.15064200 | -2.93962400 |
| C | 4.48322600 | -5.73372900 | -2.11458000 |
| H | 4.60223500 | -6.58153800 | -1.42597500 |
| H | 5.93524300 | -2.56328000 | -1.88898600 |
| H | 7.60428700 | -0.32730200 | 2.99938400  |
| H | 5.58795400 | -1.82125600 | 4.73604400  |
| H | 6.58039700 | -3.90077500 | 3.69216500  |
| H | 5.36866600 | -3.67246800 | 1.50060000  |
| H | 6.30246100 | -2.82297400 | -0.20504200 |

|   |             |             |             |
|---|-------------|-------------|-------------|
| H | 7.61613400  | -4.31648400 | -1.74741500 |
| H | 5.75841500  | -4.60233900 | -3.44055100 |
| H | 3.88818800  | -6.10595900 | -2.95503100 |
| O | 0.52138700  | -0.42581500 | -1.63476000 |
| C | -0.32282300 | -4.52515700 | 3.12807500  |
| C | 0.26711200  | -4.29058700 | 1.92044900  |
| C | -0.50032000 | -4.28786600 | 0.71111600  |
| C | -1.90454700 | -4.57433200 | 0.80507900  |
| C | -2.48148100 | -4.82362900 | 2.08927600  |
| C | -1.72000800 | -4.79092700 | 3.21850800  |
| C | 0.06707800  | -3.98396200 | -0.54464000 |
| C | -2.69150300 | -4.54897600 | -0.34650100 |
| C | -2.15034100 | -4.21308700 | -1.58598800 |
| C | -0.74870600 | -3.91053600 | -1.68987100 |
| C | -0.24047000 | -3.49592500 | -2.96523900 |
| H | 0.80459000  | -3.21695900 | -3.04171000 |
| C | -1.06003000 | -3.41127200 | -4.05189500 |
| C | -2.44625300 | -3.73327200 | -3.94999600 |
| C | -2.97227600 | -4.11676300 | -2.75382500 |
| H | 0.27578200  | -4.50744100 | 4.03321000  |
| H | 1.33106900  | -4.08709900 | 1.86602300  |
| H | -3.55031000 | -5.01170000 | 2.14525300  |
| H | -2.17404900 | -4.95758900 | 4.18978500  |
| H | -3.75627900 | -4.75844100 | -0.26871900 |
| H | -0.65885900 | -3.08221200 | -5.00519700 |
| H | -3.08222100 | -3.65193400 | -4.82566500 |
| H | -4.03121900 | -4.34172200 | -2.65777900 |
| C | 1.81223700  | 3.65434700  | 2.96824200  |
| C | 2.57290800  | 2.80541900  | 2.22095800  |
| C | 3.17057500  | 3.24000200  | 0.99069700  |
| C | 2.91446300  | 4.58338000  | 0.55152300  |
| C | 2.10649600  | 5.44124200  | 1.36550300  |
| C | 1.58539400  | 4.99924800  | 2.54254800  |
| C | 3.97711400  | 2.39547200  | 0.20573800  |
| C | 3.45969100  | 5.03239100  | -0.64914300 |
| C | 4.24610600  | 4.19803400  | -1.44350800 |
| C | 4.49999600  | 2.85051900  | -1.02218900 |
| C | 5.29844100  | 2.01927700  | -1.87374200 |
| H | 5.49852100  | 0.99781600  | -1.56905100 |
| C | 5.79917900  | 2.49127600  | -3.05051000 |
| C | 5.55537400  | 3.83505300  | -3.45978200 |
| C | 4.80663300  | 4.65982200  | -2.67621700 |
| H | 1.36472400  | 3.31297400  | 3.89732000  |
| H | 2.71899700  | 1.77659200  | 2.52990600  |

|   |             |            |             |
|---|-------------|------------|-------------|
| H | 1.92951500  | 6.45642100 | 1.02005800  |
| H | 0.98266100  | 5.65688300 | 3.16158300  |
| H | 3.25849300  | 6.04881400 | -0.98053100 |
| H | 6.39548700  | 1.84169300 | -3.68315000 |
| H | 5.97431700  | 4.19555000 | -4.39392000 |
| H | 4.61482800  | 5.68826500 | -2.96969400 |
| C | -5.71200900 | 2.11230400 | -3.38676700 |
| C | -5.81780100 | 2.15116600 | -2.00846200 |
| C | -4.66604000 | 2.10664400 | -1.20566200 |
| C | -3.39516700 | 2.05095900 | -1.80725100 |
| C | -3.30209500 | 2.00641600 | -3.20050800 |
| C | -4.44877700 | 2.03218500 | -3.97961900 |
| H | -5.76179900 | 2.06906000 | 0.66892600  |
| H | -6.60440400 | 2.12693800 | -4.00224100 |
| H | -6.79178700 | 2.19393100 | -1.53141600 |
| C | -4.76392400 | 2.06657000 | 0.23736000  |
| C | -2.19820600 | 2.07774500 | -0.94063700 |
| H | -2.32250800 | 1.94317800 | -3.66380700 |
| H | -4.36140600 | 1.98138000 | -5.05969100 |
| C | -2.35958700 | 1.93641600 | 0.51593300  |
| C | -3.69555700 | 1.97442500 | 1.06221800  |
| H | -3.83154000 | 1.89164300 | 2.13345200  |
| C | -0.99628700 | 2.31226500 | -1.45647800 |
| C | 0.12190600  | 2.63178600 | -2.04613100 |
| C | 0.52314200  | 4.02136900 | -2.34952300 |
| C | -0.02086200 | 5.11048700 | -1.65883200 |
| C | 1.43522800  | 4.25075400 | -3.38148500 |
| C | 0.32609200  | 6.40683600 | -2.01286400 |
| H | -0.70903800 | 4.93129600 | -0.83759200 |
| C | 1.76686800  | 5.55201600 | -3.74644800 |
| H | 1.88509200  | 3.40723100 | -3.89716500 |
| C | 1.21369100  | 6.63194000 | -3.06573600 |
| H | -0.09778900 | 7.24526900 | -1.46938800 |
| H | 2.46717400  | 5.71738600 | -4.55879700 |
| H | 1.47575900  | 7.64656200 | -3.34822700 |
| N | -1.30437400 | 1.77923100 | 1.26775500  |
| C | -1.34733300 | 1.59279300 | 2.71264800  |
| H | -1.98114300 | 0.72988200 | 2.94976600  |
| H | -0.32029900 | 1.33734700 | 2.99259600  |
| C | -1.83231000 | 2.80320400 | 3.48238800  |
| C | -2.52707600 | 2.61686700 | 4.67852100  |
| C | -1.58641200 | 4.09950600 | 3.02899200  |
| C | -2.95740500 | 3.71317900 | 5.42013200  |
| H | -2.74197200 | 1.60796600 | 5.02109100  |

|   |             |             |             |
|---|-------------|-------------|-------------|
| C | -2.02179000 | 5.19482500  | 3.76928400  |
| H | -1.04606500 | 4.24810600  | 2.09852400  |
| C | -2.70540300 | 5.00490600  | 4.96716900  |
| H | -3.49890900 | 3.55690000  | 6.34741100  |
| H | -1.82876800 | 6.19970000  | 3.40618400  |
| H | -3.04668700 | 5.85993700  | 5.54135400  |
| H | 0.75876500  | 1.80342400  | -2.36450700 |
| H | -0.36021100 | 1.52091200  | 0.83795500  |
| C | -2.44189200 | -1.49344300 | 1.59052700  |
| C | -3.83711400 | -1.47805900 | 1.81511700  |
| C | -4.69763000 | -1.36164000 | 0.75059600  |
| C | -4.21558600 | -1.21344000 | -0.56885600 |
| C | -2.80338100 | -1.16969900 | -0.79494900 |
| C | -1.94218600 | -1.33451800 | 0.33044300  |
| H | -1.75784100 | -1.67180700 | 2.41772000  |
| H | -5.76338000 | -1.37738100 | 0.94255300  |
| H | -0.88064100 | -1.41400000 | 0.14505500  |
| N | -2.24955800 | -0.98411900 | -1.99503000 |
| H | -2.83684800 | -0.97020500 | -2.81477700 |
| H | -1.23277900 | -0.90836900 | -2.05698600 |
| C | -4.33646600 | -1.50366400 | 3.21702300  |
| F | -5.66518000 | -1.65202000 | 3.29388300  |
| F | -3.77569200 | -2.47697100 | 3.95058800  |
| F | -4.04009400 | -0.34232500 | 3.86068800  |
| C | -5.12233600 | -1.06509500 | -1.69510200 |
| O | -4.80287400 | -0.99690200 | -2.87043400 |
| C | -6.64332700 | -1.01010700 | -1.40419000 |
| F | -7.07338400 | -2.18763100 | -0.92726400 |
| F | -7.32727100 | -0.73099400 | -2.50446800 |
| F | -6.95518200 | -0.07551900 | -0.48314700 |

### TS2-I

Value of imaginary frequency = -313.14 cm<sup>-1</sup>

|   |            |             |             |
|---|------------|-------------|-------------|
| P | 1.36538600 | 0.43103600  | 0.60825000  |
| O | 1.55055600 | 1.24915200  | -0.81831900 |
| O | 2.73919300 | 0.87204900  | 1.38201200  |
| O | 1.38542300 | -1.01664800 | 0.23933500  |
| C | 1.85620100 | 2.58782900  | -0.71803000 |
| C | 3.16563100 | 2.95047900  | -0.38481600 |
| C | 0.86165200 | 3.53923600  | -0.95725400 |
| C | 1.22149700 | 4.87994800  | -0.82678400 |
| C | 2.49248800 | 5.27785100  | -0.41293400 |
| H | 0.46766600 | 5.63968800  | -1.02169100 |
| C | 3.90322600 | 0.81687600  | 0.64325500  |



|   |             |             |             |
|---|-------------|-------------|-------------|
| C | 4.17281900  | 1.85697400  | -0.25159500 |
| C | 4.76191500  | -0.27187000 | 0.79567600  |
| C | 5.93209500  | -0.26882900 | 0.03997100  |
| C | 6.21996600  | 0.72826600  | -0.89160900 |
| H | 6.61993600  | -1.10418400 | 0.15070400  |
| C | 5.31594000  | 1.78642900  | -1.07222200 |
| C | 5.50486600  | 2.76272000  | -2.22129000 |
| C | 6.94236500  | 2.82446400  | -2.73045200 |
| H | 7.57840700  | 3.31721200  | -1.98275300 |
| C | 7.46989800  | 1.41770400  | -2.99262400 |
| H | 8.46769300  | 1.44793200  | -3.44077100 |
| C | 7.50822600  | 0.63004500  | -1.68633600 |
| H | 7.73595600  | -0.42382500 | -1.87684800 |
| H | 4.84978800  | 2.43270800  | -3.04077500 |
| C | 3.47246300  | 4.30585800  | -0.16096700 |
| C | 4.80644200  | 4.70187000  | 0.44646200  |
| C | 5.15887200  | 6.16867000  | 0.21554300  |
| H | 5.39317400  | 6.33160700  | -0.84523900 |
| C | 3.98586700  | 7.05825500  | 0.61632400  |
| H | 4.25094800  | 8.11727500  | 0.54248300  |
| C | 2.78122100  | 6.76053300  | -0.27229400 |
| H | 2.96792000  | 7.17438900  | -1.27278800 |
| H | 4.73872600  | 4.51688500  | 1.52798600  |
| H | 8.33044300  | 1.01289300  | -1.06620200 |
| H | 6.80946900  | 0.91407200  | -3.70992600 |
| H | 6.98468600  | 3.43502300  | -3.63754900 |
| H | 5.15263900  | 3.76095900  | -1.95578300 |
| H | 5.60828300  | 4.05123700  | 0.09147600  |
| H | 6.05768700  | 6.42573800  | 0.78412800  |
| H | 3.72994700  | 6.86257300  | 1.66526000  |
| H | 1.88826200  | 7.26952600  | 0.10528300  |
| O | 0.22140000  | 1.03007500  | 1.37497300  |
| C | -0.04988700 | 1.22081000  | -4.47896400 |
| C | 0.24084800  | 1.96340500  | -3.37289600 |
| C | -0.79662500 | 2.43491600  | -2.50298000 |
| C | -2.15589200 | 2.15617400  | -2.87570300 |
| C | -2.41845200 | 1.34827400  | -4.02802800 |
| C | -1.39843900 | 0.88586300  | -4.80256200 |
| C | -0.53227300 | 3.16334500  | -1.32175900 |
| C | -3.20044700 | 2.67111300  | -2.10686300 |
| C | -2.95602200 | 3.38268000  | -0.93414000 |
| C | -1.60132900 | 3.59419400  | -0.50439200 |
| C | -1.39739200 | 4.21592200  | 0.77285200  |
| H | -0.38533200 | 4.31358100  | 1.14777300  |

|   |             |             |             |
|---|-------------|-------------|-------------|
| C | -2.45287900 | 4.64044300  | 1.52475600  |
| C | -3.79480000 | 4.47303600  | 1.06936400  |
| C | -4.03490600 | 3.85579800  | -0.11983400 |
| H | 0.75409800  | 0.87576600  | -5.12227700 |
| H | 1.27122300  | 2.20455100  | -3.13964900 |
| H | -3.45218500 | 1.10402500  | -4.25577500 |
| H | -1.60587900 | 0.27262800  | -5.67387600 |
| H | -4.22826700 | 2.49536300  | -2.41889800 |
| H | -2.27401600 | 5.09388800  | 2.49466500  |
| H | -4.62093600 | 4.79768800  | 1.69404800  |
| H | -5.05076500 | 3.67810800  | -0.46395500 |
| C | 3.83799000  | -4.06753100 | -0.91477200 |
| C | 4.08313500  | -2.84712200 | -0.36117100 |
| C | 4.15769100  | -2.67901600 | 1.06113600  |
| C | 3.92722700  | -3.83086600 | 1.88658100  |
| C | 3.66167700  | -5.09307200 | 1.26608700  |
| C | 3.62632400  | -5.21156900 | -0.08927700 |
| C | 4.42613500  | -1.43418100 | 1.66459800  |
| C | 3.96103700  | -3.69951300 | 3.27327700  |
| C | 4.18665500  | -2.46501400 | 3.88194500  |
| C | 4.41856100  | -1.30611500 | 3.06685800  |
| C | 4.64851900  | -0.05552900 | 3.72567300  |
| H | 4.82795600  | 0.82667700  | 3.12085400  |
| C | 4.63254600  | 0.03820400  | 5.08557600  |
| C | 4.39773300  | -1.11325000 | 5.89226500  |
| C | 4.18804700  | -2.32496300 | 5.30610700  |
| H | 3.78024900  | -4.17421100 | -1.99428800 |
| H | 4.20777400  | -1.97741600 | -0.99597700 |
| H | 3.48253400  | -5.95173500 | 1.90764000  |
| H | 3.42330100  | -6.17138100 | -0.55430300 |
| H | 3.79265400  | -4.57724700 | 3.89409500  |
| H | 4.80002300  | 0.99803100  | 5.56339300  |
| H | 4.39234700  | -1.01869800 | 6.97344100  |
| H | 4.02124100  | -3.21362900 | 5.91029200  |
| C | -6.44490500 | -3.60751400 | -0.85669800 |
| C | -5.60921000 | -3.68070000 | -1.95095700 |
| C | -4.24867400 | -3.33702200 | -1.83611100 |
| C | -3.73291800 | -2.91819500 | -0.59152500 |
| C | -4.59321700 | -2.87143300 | 0.52045300  |
| C | -5.92717300 | -3.20282300 | 0.38523900  |
| H | -3.78429800 | -3.69861700 | -3.92238900 |
| H | -7.49580700 | -3.85713500 | -0.95168000 |
| H | -5.99251500 | -3.99063100 | -2.91902800 |
| C | -3.37219500 | -3.35990000 | -2.97518000 |

|   |             |             |             |
|---|-------------|-------------|-------------|
| C | -2.34287500 | -2.49737500 | -0.51260900 |
| H | -4.20177400 | -2.54539600 | 1.48007900  |
| H | -6.58301200 | -3.14359900 | 1.24785200  |
| C | -1.51134200 | -2.49672800 | -1.68750700 |
| C | -2.07179300 | -2.97842100 | -2.92138100 |
| H | -1.44727900 | -3.02333400 | -3.80517300 |
| C | -1.84280800 | -1.87104300 | 0.59493300  |
| C | -1.18587000 | -1.76365800 | 1.72342500  |
| C | -0.66656700 | -2.92213300 | 2.47758200  |
| C | -1.10934200 | -4.23043800 | 2.25266300  |
| C | 0.29926400  | -2.67887600 | 3.45746100  |
| C | -0.58518000 | -5.27848400 | 2.99679000  |
| H | -1.87136600 | -4.42009900 | 1.50194200  |
| C | 0.81094500  | -3.73058700 | 4.20901500  |
| H | 0.65624300  | -1.66514300 | 3.61773800  |
| C | 0.37292800  | -5.03103800 | 3.97889600  |
| H | -0.93272900 | -6.29092800 | 2.81859400  |
| H | 1.55790300  | -3.52611100 | 4.96912400  |
| H | 0.77243500  | -5.85204100 | 4.56611900  |
| N | -0.27181500 | -2.03016700 | -1.62298100 |
| C | 0.65976100  | -1.96814700 | -2.72961500 |
| H | 0.18746300  | -1.46695200 | -3.58333500 |
| H | 1.46947900  | -1.31656300 | -2.38480200 |
| C | 1.22020700  | -3.31311700 | -3.15760900 |
| C | 2.06952400  | -3.35625300 | -4.26661500 |
| C | 0.93748800  | -4.49532500 | -2.47632700 |
| C | 2.62851900  | -4.55768900 | -4.68600800 |
| H | 2.29791500  | -2.43642100 | -4.80034600 |
| C | 1.48555000  | -5.70313500 | -2.90509400 |
| H | 0.30736100  | -4.47494900 | -1.59289200 |
| C | 2.33370200  | -5.73911600 | -4.00628300 |
| H | 3.29049700  | -4.57446400 | -5.54589500 |
| H | 1.25263100  | -6.61645400 | -2.36659600 |
| H | 2.76344800  | -6.67936800 | -4.33585500 |
| H | -0.94807500 | -0.77674100 | 2.11587500  |
| H | 0.14765000  | -1.72118500 | -0.72458600 |
| C | -3.94463300 | 1.67026200  | 2.90498900  |
| C | -5.27254000 | 1.55564300  | 2.47258100  |
| C | -5.55442400 | 1.03656000  | 1.22568200  |
| C | -4.52159300 | 0.59887900  | 0.37860000  |
| C | -3.17825700 | 0.70640600  | 0.82532700  |
| C | -2.91122600 | 1.25580400  | 2.09517000  |
| H | -3.73209900 | 2.10380600  | 3.87753700  |
| H | -6.58821000 | 0.97630200  | 0.90938900  |

|   |             |             |             |
|---|-------------|-------------|-------------|
| H | -1.87190400 | 1.38033800  | 2.38762900  |
| N | -2.09999100 | 0.25936800  | 0.09041600  |
| H | -2.25129400 | 0.19415500  | -0.91276700 |
| H | -1.19971200 | 0.67135300  | 0.39676700  |
| C | -6.36530400 | 2.10204600  | 3.33658100  |
| F | -7.57561800 | 1.66952500  | 2.95791500  |
| F | -6.19498700 | 1.76423700  | 4.62375700  |
| F | -6.39893500 | 3.44768600  | 3.29855500  |
| C | -4.81594200 | 0.13331100  | -0.98389900 |
| O | -4.00371200 | -0.28140500 | -1.78641900 |
| C | -6.27030500 | 0.25320600  | -1.50048000 |
| F | -7.13306900 | -0.44513700 | -0.75159300 |
| F | -6.35767600 | -0.18004600 | -2.74854400 |
| F | -6.65746900 | 1.54156300  | -1.47736300 |

### TS2-I'

Value of imaginary frequency = -257.02 cm<sup>-1</sup>

|   |            |             |             |
|---|------------|-------------|-------------|
| P | 1.51009900 | -0.17084700 | -0.63267700 |
| O | 1.70858000 | -1.44030200 | 0.41426700  |
| O | 3.06733200 | 0.13751000  | -1.04191300 |
| O | 0.90994300 | 0.92536100  | 0.18493000  |
| C | 2.41780000 | -2.50530800 | -0.09884700 |
| C | 3.80701600 | -2.39280100 | -0.19751500 |
| C | 1.73754300 | -3.65397300 | -0.50757000 |
| C | 2.49355100 | -4.66833600 | -1.08859200 |
| C | 3.86841800 | -4.54882800 | -1.30070100 |
| H | 1.98438100 | -5.57358500 | -1.41234700 |
| C | 4.02282700 | 0.07491500  | -0.05188800 |
| C | 4.44381800 | -1.18036000 | 0.39618100  |
| C | 4.54890900 | 1.25868400  | 0.46474800  |
| C | 5.52150100 | 1.14830500  | 1.45501400  |
| C | 5.92872400 | -0.08338600 | 1.96803100  |
| H | 5.94701600 | 2.06103400  | 1.86632000  |
| C | 5.36602900 | -1.26343800 | 1.45810300  |
| C | 5.65356900 | -2.59778100 | 2.12525200  |
| C | 6.93648500 | -2.59580700 | 2.95221300  |
| H | 7.80685400 | -2.55518700 | 2.28349300  |
| C | 6.96172900 | -1.38963400 | 3.88544700  |
| H | 7.83281800 | -1.42122300 | 4.54691300  |
| C | 6.97667600 | -0.10366300 | 3.06425500  |
| H | 6.84037800 | 0.76947200  | 3.71072700  |
| H | 4.80271900 | -2.82264600 | 2.78484900  |
| C | 4.53680400 | -3.39650800 | -0.86310800 |
| C | 6.00213700 | -3.18223200 | -1.19765100 |

|   |             |             |             |
|---|-------------|-------------|-------------|
| C | 6.73889300  | -4.47858700 | -1.52312100 |
| H | 6.85818800  | -5.07672400 | -0.60954600 |
| C | 5.95305200  | -5.28317000 | -2.55415900 |
| H | 6.50935300  | -6.17153300 | -2.86820300 |
| C | 4.60279800  | -5.69334700 | -1.97277900 |
| H | 4.76227200  | -6.48829900 | -1.23132200 |
| H | 6.04372000  | -2.51730300 | -2.07206000 |
| H | 7.96712400  | 0.01009000  | 2.60248200  |
| H | 6.07023200  | -1.41082600 | 4.52501200  |
| H | 7.01112300  | -3.53040500 | 3.51641700  |
| H | 5.67414700  | -3.40861300 | 1.39474600  |
| H | 6.51082100  | -2.64014400 | -0.39738900 |
| H | 7.74460800  | -4.24950300 | -1.88828800 |
| H | 5.79919200  | -4.66644100 | -3.44860400 |
| H | 3.96422200  | -6.12622700 | -2.74984600 |
| O | 0.84227000  | -0.66563200 | -1.88274600 |
| C | 0.04158800  | -4.15922300 | 3.39868200  |
| C | 0.57385500  | -3.97608100 | 2.15664800  |
| C | -0.24288700 | -4.06033200 | 0.98211400  |
| C | -1.63626900 | -4.36945600 | 1.15289000  |
| C | -2.15020000 | -4.57085500 | 2.47262800  |
| C | -1.34275700 | -4.45993800 | 3.56360900  |
| C | 0.26880400  | -3.82887700 | -0.31141100 |
| C | -2.47205800 | -4.41985400 | 0.03847200  |
| C | -1.98882400 | -4.14061300 | -1.23978000 |
| C | -0.59690300 | -3.83265000 | -1.42332300 |
| C | -0.14905300 | -3.47852600 | -2.73855500 |
| H | 0.88660700  | -3.18835600 | -2.87226100 |
| C | -1.02145500 | -3.43621200 | -3.78658600 |
| C | -2.39990800 | -3.75392000 | -3.60393600 |
| C | -2.86533600 | -4.09658000 | -2.36952700 |
| H | 0.67641600  | -4.07713800 | 4.27510900  |
| H | 1.62859300  | -3.75005100 | 2.04450900  |
| H | -3.20950000 | -4.78589600 | 2.58510600  |
| H | -1.74987600 | -4.59151800 | 4.56074600  |
| H | -3.53048500 | -4.63647500 | 0.17173200  |
| H | -0.66879200 | -3.14217000 | -4.76974900 |
| H | -3.08037800 | -3.70095000 | -4.44765600 |
| H | -3.91855300 | -4.31838600 | -2.21247900 |
| C | 2.07898600  | 3.65307100  | 2.98636400  |
| C | 2.82692700  | 2.87341900  | 2.15528000  |
| C | 3.27540700  | 3.36841300  | 0.88647900  |
| C | 2.88193900  | 4.69469000  | 0.50016300  |
| C | 2.08536500  | 5.47326800  | 1.39954900  |

|   |             |            |             |
|---|-------------|------------|-------------|
| C | 1.70256900  | 4.97617000 | 2.60762100  |
| C | 4.06907300  | 2.59648800 | 0.01752800  |
| C | 3.28971700  | 5.19854900 | -0.73400900 |
| C | 4.06927600  | 4.43896200 | -1.60634400 |
| C | 4.45547900  | 3.10711400 | -1.23578800 |
| C | 5.24115200  | 2.34867600 | -2.16274500 |
| H | 5.53021800  | 1.33804700 | -1.89468100 |
| C | 5.61773500  | 2.87517900 | -3.36230800 |
| C | 5.24873900  | 4.20515300 | -3.72098900 |
| C | 4.50228200  | 4.96031500 | -2.86695800 |
| H | 1.74494800  | 3.26353100 | 3.94384000  |
| H | 3.08076700  | 1.85754900 | 2.43680800  |
| H | 1.78798700  | 6.47179300 | 1.09055100  |
| H | 1.08578000  | 5.56677900 | 3.27890200  |
| H | 2.99454100  | 6.20501300 | -1.02270400 |
| H | 6.20783400  | 2.28171700 | -4.05302200 |
| H | 5.56919400  | 4.61156100 | -4.67503600 |
| H | 4.21716700  | 5.97699700 | -3.12671200 |
| C | -7.23440600 | 1.77666000 | -2.04079900 |
| C | -6.87433600 | 1.93857500 | -0.71905100 |
| C | -5.51802400 | 1.94101300 | -0.34352100 |
| C | -4.51518400 | 1.77834600 | -1.32533800 |
| C | -4.89925900 | 1.62730500 | -2.66834300 |
| C | -6.23703800 | 1.62128800 | -3.01601100 |
| H | -5.90580400 | 2.19005500 | 1.77533000  |
| H | -8.28041600 | 1.76570900 | -2.32608200 |
| H | -7.63219400 | 2.05682200 | 0.05030800  |
| C | -5.12170100 | 2.09256000 | 1.02847800  |
| C | -3.11720000 | 1.76241800 | -0.91399400 |
| H | -4.13395800 | 1.48874900 | -3.42572000 |
| H | -6.51680400 | 1.48950300 | -4.05593400 |
| C | -2.76393600 | 1.97128200 | 0.47013700  |
| C | -3.82517200 | 2.12594500 | 1.42896400  |
| H | -3.58099000 | 2.25576500 | 2.47593600  |
| C | -2.10520000 | 1.43501900 | -1.76989100 |
| C | -1.05324700 | 1.65807700 | -2.52033400 |
| C | -0.63990300 | 3.01830600 | -2.92794100 |
| C | -1.51122700 | 4.11325200 | -2.90136600 |
| C | 0.68463400  | 3.19828100 | -3.33586100 |
| C | -1.05613100 | 5.37174000 | -3.27095100 |
| H | -2.54619300 | 3.97107100 | -2.60287800 |
| C | 1.13324400  | 4.45982600 | -3.71182600 |
| H | 1.36337900  | 2.34922800 | -3.34101800 |
| C | 0.26585400  | 5.54729500 | -3.67772300 |

|   |             |             |             |
|---|-------------|-------------|-------------|
| H | -1.73673200 | 6.21683100  | -3.25182600 |
| H | 2.16372300  | 4.58629100  | -4.02612400 |
| H | 0.61601900  | 6.53141900  | -3.97293700 |
| N | -1.49295400 | 2.01860200  | 0.84528000  |
| C | -1.04637100 | 2.17860800  | 2.21398200  |
| H | -1.50644300 | 1.40853800  | 2.85076800  |
| H | 0.03084400  | 1.98357100  | 2.18776000  |
| C | -1.31585100 | 3.55552300  | 2.78973700  |
| C | -1.29182000 | 3.72860700  | 4.17494900  |
| C | -1.54334700 | 4.66226000  | 1.97187400  |
| C | -1.48376100 | 4.98766000  | 4.73550200  |
| H | -1.12028100 | 2.86897800  | 4.81903300  |
| C | -1.74735900 | 5.92033500  | 2.53219900  |
| H | -1.54394500 | 4.54086500  | 0.89276800  |
| C | -1.71692900 | 6.08838400  | 3.91356700  |
| H | -1.46188600 | 5.10741200  | 5.81397900  |
| H | -1.92491900 | 6.77309700  | 1.88458200  |
| H | -1.87644800 | 7.06956300  | 4.34868700  |
| H | -0.39746700 | 0.83578400  | -2.80275100 |
| H | -0.74074300 | 1.75511500  | 0.19608700  |
| C | -2.32461800 | -1.27707500 | 2.07890800  |
| C | -3.71056800 | -1.48347600 | 2.16931100  |
| C | -4.48036900 | -1.52876200 | 1.02942000  |
| C | -3.89614300 | -1.33908200 | -0.23932300 |
| C | -2.49923100 | -1.10713800 | -0.33064700 |
| C | -1.72961100 | -1.08834400 | 0.85389600  |
| H | -1.71535600 | -1.28425900 | 2.97852500  |
| H | -5.54551000 | -1.69517700 | 1.12519400  |
| H | -0.66227300 | -0.89942800 | 0.79523600  |
| N | -1.88883700 | -0.79817600 | -1.51810100 |
| H | -2.39390000 | -1.08543500 | -2.35158600 |
| H | -0.85647200 | -0.89564500 | -1.57116600 |
| C | -4.33314200 | -1.57576600 | 3.52611400  |
| F | -5.63855800 | -1.87125400 | 3.47025400  |
| F | -3.74117000 | -2.50580600 | 4.29183800  |
| F | -4.21634200 | -0.40881600 | 4.18851700  |
| C | -4.70810200 | -1.44433300 | -1.45840000 |
| O | -4.32156800 | -1.23814700 | -2.59194800 |
| C | -6.17263600 | -1.92438700 | -1.31994900 |
| F | -6.19885500 | -3.14790100 | -0.76381000 |
| F | -6.75649500 | -1.99364300 | -2.50546900 |
| F | -6.90067800 | -1.10889100 | -0.54382600 |

IM3-I

|   |            |             |             |
|---|------------|-------------|-------------|
| P | 1.44466400 | 0.34594000  | 0.28135800  |
| O | 1.74858900 | 1.02712900  | -1.15696200 |
| O | 2.59401200 | 0.97885400  | 1.22025100  |
| O | 1.45467500 | -1.12371700 | 0.17262100  |
| C | 1.96109900 | 2.40225800  | -1.14909800 |
| C | 3.19029000 | 2.87815100  | -0.68841100 |
| C | 0.93873200 | 3.24741200  | -1.57598400 |
| C | 1.20406500 | 4.61656000  | -1.53803900 |
| C | 2.39313000 | 5.13817900  | -1.02970700 |
| H | 0.43170800 | 5.30042600  | -1.88235400 |
| C | 3.87438500 | 0.91943800  | 0.66557700  |
| C | 4.21727800 | 1.87006400  | -0.29900300 |
| C | 4.73671200 | -0.10345100 | 1.04929000  |
| C | 5.99514700 | -0.12101800 | 0.44897900  |
| C | 6.36939200 | 0.78635600  | -0.54087700 |
| H | 6.68975200 | -0.90600400 | 0.73815000  |
| C | 5.46097900 | 1.77438500  | -0.95149900 |
| C | 5.76396000 | 2.63443000  | -2.16617500 |
| C | 7.25362800 | 2.71786300  | -2.48749900 |
| H | 7.76426600 | 3.31709000  | -1.72183000 |
| C | 7.86335200 | 1.32024500  | -2.52548900 |
| H | 8.91106900 | 1.35628700  | -2.83805500 |
| C | 7.75372800 | 0.67052800  | -1.14898000 |
| H | 8.04026500 | -0.38497200 | -1.19472200 |
| H | 5.23807900 | 2.18610100  | -3.02149200 |
| C | 3.38958800 | 4.26548100  | -0.56572000 |
| C | 4.60977300 | 4.80738700  | 0.15646800  |
| C | 4.90538700 | 6.26624100  | -0.18075000 |
| H | 5.26359100 | 6.34252300  | -1.21620000 |
| C | 3.64267700 | 7.10719500  | -0.01842000 |
| H | 3.85487100 | 8.16939000  | -0.17128500 |
| C | 2.57762000 | 6.64344400  | -1.00856100 |
| H | 2.86417200 | 6.96921000  | -2.01770300 |
| H | 4.41360500 | 4.72277800  | 1.23480100  |
| H | 8.47004600 | 1.15288100  | -0.47005000 |
| H | 7.32693500 | 0.71348200  | -3.26575700 |
| H | 7.39396700 | 3.23304100  | -3.44233500 |
| H | 5.34082900 | 3.63474300  | -2.05918500 |
| H | 5.48586100 | 4.18243000  | -0.02850700 |
| H | 5.70829700 | 6.63700500  | 0.46312100  |
| H | 3.26823900 | 6.99823600  | 1.00715300  |
| H | 1.61670200 | 7.12285000  | -0.79557700 |
| O | 0.16662800 | 1.05401000  | 0.84699200  |
| C | 0.47070900 | 0.53694100  | -4.90333500 |



|   |             |             |             |
|---|-------------|-------------|-------------|
| C | 0.62474200  | 1.39798900  | -3.85879200 |
| C | -0.50832100 | 1.88909800  | -3.13044300 |
| C | -1.81369900 | 1.49462600  | -3.58300100 |
| C | -1.93154600 | 0.57304700  | -4.67233200 |
| C | -0.82572900 | 0.09913300  | -5.30810800 |
| C | -0.39055000 | 2.74510200  | -2.01664300 |
| C | -2.94603200 | 2.02882200  | -2.97183200 |
| C | -2.84532300 | 2.87057600  | -1.86263600 |
| C | -1.54811100 | 3.19094600  | -1.33646600 |
| C | -1.49214700 | 3.93437800  | -0.11107100 |
| H | -0.52621000 | 4.11270600  | 0.34763400  |
| C | -2.63021000 | 4.38561100  | 0.49350100  |
| C | -3.90989800 | 4.14009100  | -0.08163400 |
| C | -4.01128800 | 3.39520000  | -1.21892000 |
| H | 1.34489800  | 0.17401000  | -5.43492000 |
| H | 1.61800300  | 1.72040800  | -3.56915800 |
| H | -2.92728500 | 0.25947500  | -4.97198200 |
| H | -0.92309100 | -0.60175300 | -6.13119400 |
| H | -3.92932900 | 1.75681000  | -3.34571300 |
| H | -2.56608900 | 4.93028600  | 1.43036500  |
| H | -4.79896300 | 4.51651600  | 0.41522300  |
| H | -4.98358800 | 3.16217900  | -1.64686000 |
| C | 4.07417900  | -4.08019200 | -0.33844200 |
| C | 4.20114800  | -2.79862600 | 0.10430000  |
| C | 4.22095700  | -2.49856300 | 1.50736800  |
| C | 4.05946000  | -3.58437800 | 2.43263600  |
| C | 3.98939500  | -4.92231000 | 1.92560300  |
| C | 3.99534700  | -5.16356200 | 0.58665600  |
| C | 4.35807200  | -1.18591200 | 2.00017200  |
| C | 3.95834900  | -3.31386800 | 3.79700700  |
| C | 4.00914000  | -2.00769100 | 4.28726500  |
| C | 4.22818500  | -0.91928700 | 3.37646900  |
| C | 4.31930000  | 0.40394300  | 3.91611600  |
| H | 4.49577800  | 1.23358900  | 3.23977500  |
| C | 4.17970400  | 0.62880400  | 5.25327400  |
| C | 3.95001600  | -0.45216600 | 6.15355000  |
| C | 3.87211400  | -1.72788200 | 5.68322800  |
| H | 4.00737200  | -4.28802700 | -1.40264400 |
| H | 4.24220000  | -1.97875400 | -0.60397000 |
| H | 3.91164300  | -5.73911600 | 2.63899300  |
| H | 3.91725300  | -6.17791800 | 0.20876300  |
| H | 3.83286400  | -4.13855400 | 4.49609500  |
| H | 4.24411600  | 1.64031100  | 5.64107100  |
| H | 3.84176500  | -0.25173500 | 7.21452600  |

|   |             |             |             |
|---|-------------|-------------|-------------|
| H | 3.70280100  | -2.56101900 | 6.35981100  |
| C | -6.57526700 | -3.55510200 | -0.87490500 |
| C | -5.73653700 | -3.74756000 | -1.94312500 |
| C | -4.39232100 | -3.30258500 | -1.90834000 |
| C | -3.90379400 | -2.63459900 | -0.75159200 |
| C | -4.79014500 | -2.46698700 | 0.34984600  |
| C | -6.08746300 | -2.91482000 | 0.28734700  |
| H | -3.86928000 | -4.02692000 | -3.87748800 |
| H | -7.60388000 | -3.89671000 | -0.91340400 |
| H | -6.09223600 | -4.24809100 | -2.84002800 |
| C | -3.50397200 | -3.50386000 | -2.99774700 |
| C | -2.56403100 | -2.16016800 | -0.72788300 |
| H | -4.41798100 | -1.99359200 | 1.25582900  |
| H | -6.74532700 | -2.77481700 | 1.13913600  |
| C | -1.71410800 | -2.36801400 | -1.81555900 |
| C | -2.21057300 | -3.06988600 | -2.95533900 |
| H | -1.54692900 | -3.25834700 | -3.79152500 |
| C | -2.05214800 | -1.33460200 | 0.40169100  |
| C | -1.34338500 | -1.77143000 | 1.44990500  |
| C | -0.99203100 | -3.16870100 | 1.75788400  |
| C | -1.84433400 | -4.25009200 | 1.49887000  |
| C | 0.26302500  | -3.41860300 | 2.33012900  |
| C | -1.44138000 | -5.54938600 | 1.78682400  |
| H | -2.83068500 | -4.07484800 | 1.08657000  |
| C | 0.65493100  | -4.71760100 | 2.62879100  |
| H | 0.94161800  | -2.58956800 | 2.51400200  |
| C | -0.19269600 | -5.78806000 | 2.35428400  |
| H | -2.11346700 | -6.37565100 | 1.57806100  |
| H | 1.62706400  | -4.88872800 | 3.07562800  |
| H | 0.11606700  | -6.80233400 | 2.58865100  |
| N | -0.43673800 | -1.85784900 | -1.79058400 |
| C | 0.60119100  | -2.28078800 | -2.70228800 |
| H | 0.29073300  | -2.09077700 | -3.73623800 |
| H | 1.45179500  | -1.61605400 | -2.51327000 |
| C | 1.05218700  | -3.72539000 | -2.54768700 |
| C | 1.79508400  | -4.32556700 | -3.56766000 |
| C | 0.78067600  | -4.45672300 | -1.39123400 |
| C | 2.25958700  | -5.63051400 | -3.43785900 |
| H | 2.01023300  | -3.76224400 | -4.47339900 |
| C | 1.23465000  | -5.76762300 | -1.26412000 |
| H | 0.21686100  | -4.00525300 | -0.57958100 |
| C | 1.97563700  | -6.35836200 | -2.28324000 |
| H | 2.83370100  | -6.08314900 | -4.24066000 |
| H | 1.01145000  | -6.31681000 | -0.35427600 |

|   |             |             |             |
|---|-------------|-------------|-------------|
| H | 2.32799900  | -7.38056000 | -2.18288700 |
| H | -0.90941700 | -1.02662400 | 2.11504900  |
| H | -0.06269900 | -1.66805700 | -0.86543400 |
| C | -3.34277400 | 2.01722500  | 3.19217000  |
| C | -4.68924600 | 2.22309100  | 2.91437600  |
| C | -5.25898200 | 1.68532900  | 1.77128900  |
| C | -4.47999400 | 0.96060400  | 0.86427800  |
| C | -3.10186600 | 0.78581200  | 1.12258500  |
| C | -2.55846600 | 1.29969600  | 2.30029300  |
| H | -2.90371100 | 2.43675400  | 4.09092600  |
| H | -6.31073700 | 1.86198900  | 1.57986200  |
| H | -1.49707000 | 1.18193100  | 2.48620300  |
| N | -2.21708600 | 0.11232100  | 0.21087500  |
| H | -2.54503500 | 0.26367800  | -0.74420400 |
| H | -0.73559000 | 0.71575200  | 0.47294000  |
| C | -5.50755300 | 3.13054600  | 3.78464900  |
| F | -6.80084200 | 2.78340800  | 3.79321800  |
| F | -5.07305400 | 3.13434900  | 5.05076200  |
| F | -5.44578100 | 4.39930200  | 3.34267500  |
| C | -5.10241500 | 0.47969000  | -0.39753000 |
| O | -4.50277500 | 0.19808900  | -1.40724300 |
| C | -6.64643900 | 0.41054800  | -0.46813400 |
| F | -7.18992400 | -0.10301100 | 0.64026600  |
| F | -7.03448900 | -0.30781800 | -1.50611500 |
| F | -7.13098600 | 1.66016800  | -0.61253100 |

### IM3-I'

|   |            |             |             |
|---|------------|-------------|-------------|
| P | 1.31028300 | -0.50720700 | -0.27541700 |
| O | 1.22456900 | -1.78082400 | 0.72020500  |
| O | 2.79162600 | -0.62003500 | -0.90251400 |
| O | 1.00577100 | 0.73456200  | 0.46068600  |
| C | 1.75797800 | -2.97713400 | 0.24729800  |
| C | 3.14746200 | -3.10992500 | 0.22007700  |
| C | 0.90109300 | -3.98136100 | -0.19508600 |
| C | 1.49825200 | -5.14680300 | -0.67501500 |
| C | 2.87985700 | -5.30210700 | -0.77132900 |
| H | 0.85070100 | -5.94979800 | -1.01915300 |
| C | 3.81357800 | -0.73660700 | 0.04019000  |
| C | 3.97964700 | -1.96279100 | 0.68440800  |
| C | 4.62788600 | 0.36443200  | 0.29653400  |
| C | 5.59550900 | 0.20900000  | 1.28692600  |
| C | 5.72797200 | -0.96523800 | 2.02974900  |
| H | 6.24997000 | 1.05023100  | 1.50355300  |
| C | 4.90544200 | -2.06378600 | 1.74033100  |

|   |             |             |             |
|---|-------------|-------------|-------------|
| C | 4.94082700  | -3.30558300 | 2.61245300  |
| C | 6.24024100  | -3.44562700 | 3.40077300  |
| H | 7.06415300  | -3.69126000 | 2.71730700  |
| C | 6.55614100  | -2.14069300 | 4.12558900  |
| H | 7.43524900  | -2.24971700 | 4.76732200  |
| C | 6.79044600  | -1.02544900 | 3.11019000  |
| H | 6.85181000  | -0.05372700 | 3.61070200  |
| H | 4.10042800  | -3.23449400 | 3.31747400  |
| C | 3.72262500  | -4.26423600 | -0.34551100 |
| C | 5.21718000  | -4.33574400 | -0.60625800 |
| C | 5.72230400  | -5.75885500 | -0.82901900 |
| H | 5.69280900  | -6.31374500 | 0.11820900  |
| C | 4.85354200  | -6.47256400 | -1.85962300 |
| H | 5.25435400  | -7.46302000 | -2.09406000 |
| C | 3.42752600  | -6.60025500 | -1.33196400 |
| H | 3.40913400  | -7.35605100 | -0.53508000 |
| H | 5.41970200  | -3.73840700 | -1.50710600 |
| H | 7.76446400  | -1.18195800 | 2.62712700  |
| H | 5.71289200  | -1.87844300 | 4.77675200  |
| H | 6.15358300  | -4.27575300 | 4.10787300  |
| H | 4.74880900  | -4.20394000 | 2.02163500  |
| H | 5.78191200  | -3.85342500 | 0.19358700  |
| H | 6.76785800  | -5.72972900 | -1.14942200 |
| H | 4.85369500  | -5.89556600 | -2.79287500 |
| H | 2.75580100  | -6.96638700 | -2.11492900 |
| O | 0.44107000  | -0.85579900 | -1.53124800 |
| C | -1.38545500 | -3.94618300 | 3.45335200  |
| C | -0.66171700 | -3.86590700 | 2.29998900  |
| C | -1.30112500 | -3.94187900 | 1.02057600  |
| C | -2.72653200 | -4.11128700 | 0.99024800  |
| C | -3.44289600 | -4.22131600 | 2.22264100  |
| C | -2.79782600 | -4.13622500 | 3.41915300  |
| C | -0.58665200 | -3.88390400 | -0.19272800 |
| C | -3.38976700 | -4.17765000 | -0.23474400 |
| C | -2.70170300 | -4.05012700 | -1.44109200 |
| C | -1.27379500 | -3.89063700 | -1.42484300 |
| C | -0.60185100 | -3.72675200 | -2.68092600 |
| H | 0.46909400  | -3.55754200 | -2.68056700 |
| C | -1.29603900 | -3.74203600 | -3.85449300 |
| C | -2.70874300 | -3.93219900 | -3.86748600 |
| C | -3.38778900 | -4.07908200 | -2.69670300 |
| H | -0.88151700 | -3.87427700 | 4.41181000  |
| H | 0.41383300  | -3.73423700 | 2.34243600  |
| H | -4.51959900 | -4.35611600 | 2.18031200  |

|   |             |             |             |
|---|-------------|-------------|-------------|
| H | -3.35529300 | -4.20186300 | 4.34741100  |
| H | -4.46799300 | -4.31964100 | -0.24822600 |
| H | -0.77014300 | -3.59868200 | -4.79278100 |
| H | -3.24027000 | -3.94064200 | -4.81315700 |
| H | -4.46815400 | -4.19953000 | -2.68929000 |
| C | 3.33273700  | 3.97458000  | 2.20418300  |
| C | 3.69277200  | 2.81596300  | 1.58242800  |
| C | 4.12364400  | 2.81784600  | 0.21460900  |
| C | 4.14413000  | 4.07351400  | -0.48380900 |
| C | 3.75333000  | 5.26376200  | 0.20863200  |
| C | 3.36011200  | 5.22056500  | 1.51067700  |
| C | 4.51054000  | 1.64274200  | -0.45843100 |
| C | 4.52969400  | 4.10445200  | -1.82344700 |
| C | 4.86886300  | 2.94050200  | -2.51403900 |
| C | 4.86558100  | 1.68177500  | -1.82296600 |
| C | 5.25266300  | 0.51425700  | -2.55739700 |
| H | 5.27454400  | -0.44384400 | -2.04997400 |
| C | 5.59206900  | 0.59113900  | -3.87516800 |
| C | 5.58015700  | 1.84065100  | -4.56037500 |
| C | 5.23384900  | 2.97765900  | -3.89665300 |
| H | 2.99796400  | 3.95543100  | 3.23733400  |
| H | 3.63471700  | 1.87081700  | 2.11084700  |
| H | 3.76250700  | 6.20438300  | -0.33588700 |
| H | 3.03478100  | 6.12209500  | 2.02100500  |
| H | 4.56971700  | 5.05882800  | -2.34464700 |
| H | 5.87696200  | -0.30782200 | -4.41206400 |
| H | 5.85204100  | 1.87929100  | -5.61011100 |
| H | 5.22492700  | 3.93833700  | -4.40392800 |
| C | -6.84498800 | 2.58097200  | -1.06649600 |
| C | -6.29226400 | 3.19406600  | 0.03020300  |
| C | -4.89327300 | 3.18441800  | 0.24604900  |
| C | -4.04198300 | 2.52037000  | -0.68008300 |
| C | -4.63822600 | 1.95134300  | -1.83920700 |
| C | -6.00027900 | 1.96724400  | -2.01847300 |
| H | -4.93517100 | 4.36128200  | 2.06098300  |
| H | -7.91935700 | 2.58095600  | -1.21491000 |
| H | -6.92423200 | 3.69580000  | 0.75841000  |
| C | -4.29629400 | 3.82719900  | 1.36280600  |
| C | -2.64185300 | 2.44060100  | -0.43281000 |
| H | -4.00460600 | 1.50670700  | -2.60013500 |
| H | -6.42915000 | 1.50786500  | -2.90481300 |
| C | -2.08666400 | 3.06368200  | 0.68967500  |
| C | -2.94822800 | 3.79382000  | 1.56886000  |
| H | -2.51800300 | 4.31638300  | 2.41546000  |

|   |             |             |             |
|---|-------------|-------------|-------------|
| C | -1.78022900 | 1.60561400  | -1.31078100 |
| C | -0.77202900 | 2.07022200  | -2.06311800 |
| C | -0.43989600 | 3.49848900  | -2.22852500 |
| C | -1.43150700 | 4.47071000  | -2.41608600 |
| C | 0.90249900  | 3.89664900  | -2.20786300 |
| C | -1.08890800 | 5.80917500  | -2.56993900 |
| H | -2.47288400 | 4.16768200  | -2.45435400 |
| C | 1.24106400  | 5.23715700  | -2.36159200 |
| H | 1.68270500  | 3.15350800  | -2.05723200 |
| C | 0.24916600  | 6.19666900  | -2.54521200 |
| H | -1.86881300 | 6.54906800  | -2.71875700 |
| H | 2.28490900  | 5.52863900  | -2.33742700 |
| H | 0.51789200  | 7.24051900  | -2.67541500 |
| N | -0.75595100 | 2.95856400  | 0.96961500  |
| C | -0.14138800 | 3.44040700  | 2.17833400  |
| H | -0.72092100 | 3.14222500  | 3.06502600  |
| H | 0.82600000  | 2.93149600  | 2.24861900  |
| C | 0.08833700  | 4.94193200  | 2.20764500  |
| C | 0.40074300  | 5.57051800  | 3.41521500  |
| C | 0.03903000  | 5.70113200  | 1.03953500  |
| C | 0.67168300  | 6.93511000  | 3.45537400  |
| H | 0.43167500  | 4.98473400  | 4.33199100  |
| C | 0.30616800  | 7.06715700  | 1.07915500  |
| H | -0.20250400 | 5.21487800  | 0.09865300  |
| C | 0.62474600  | 7.68882900  | 2.28345400  |
| H | 0.91199900  | 7.41168800  | 4.40079200  |
| H | 0.26348500  | 7.64297300  | 0.15934300  |
| H | 0.83014800  | 8.75427600  | 2.31271700  |
| H | -0.12111100 | 1.35622800  | -2.56469200 |
| H | -0.19231000 | 2.32999400  | 0.40972500  |
| C | -2.82870500 | -0.54386400 | 2.20901000  |
| C | -4.11472700 | -1.07542800 | 2.12136100  |
| C | -4.69778500 | -1.28818100 | 0.88530500  |
| C | -4.02293300 | -0.93519300 | -0.29278800 |
| C | -2.74445200 | -0.34087200 | -0.19826000 |
| C | -2.15270000 | -0.17844800 | 1.05794500  |
| H | -2.36079600 | -0.41449300 | 3.17859600  |
| H | -5.68197900 | -1.73962700 | 0.84274400  |
| H | -1.16234200 | 0.26571900  | 1.12060500  |
| N | -2.04459900 | 0.16658300  | -1.32418900 |
| H | -2.48539800 | -0.13625200 | -2.19170400 |
| H | -0.52126600 | -0.54183100 | -1.44448600 |
| C | -4.90110800 | -1.35827600 | 3.36744800  |
| F | -5.70249900 | -2.42846000 | 3.22816800  |

|   |             |             |             |
|---|-------------|-------------|-------------|
| F | -4.10691400 | -1.57993200 | 4.42425100  |
| F | -5.69738700 | -0.32709600 | 3.68895900  |
| C | -4.65044900 | -1.16510800 | -1.60785700 |
| O | -4.09626300 | -1.06062000 | -2.68203000 |
| C | -6.13560300 | -1.60188400 | -1.65006000 |
| F | -6.26301100 | -2.85129600 | -1.16173000 |
| F | -6.58153700 | -1.60299300 | -2.89700300 |
| F | -6.91668800 | -0.80146600 | -0.92125300 |

**IM4a**

|   |             |             |             |
|---|-------------|-------------|-------------|
| C | 3.93099200  | -4.59728600 | 0.84689300  |
| C | 4.41833300  | -3.82123200 | -0.17251500 |
| C | 3.64278200  | -2.77092500 | -0.72161600 |
| C | 2.33746400  | -2.51461700 | -0.21658900 |
| C | 1.86350900  | -3.33293200 | 0.84485200  |
| C | 2.63829600  | -4.34313400 | 1.35690500  |
| H | 5.14878900  | -2.12817500 | -2.13412800 |
| H | 4.53059300  | -5.39975700 | 1.26317200  |
| H | 5.41125700  | -3.99757500 | -0.57767000 |
| C | 4.14285000  | -1.94745500 | -1.76499900 |
| C | 1.57006700  | -1.44294200 | -0.77393100 |
| H | 0.87637100  | -3.14767600 | 1.25365500  |
| H | 2.25234600  | -4.95432000 | 2.16666800  |
| C | 2.06901300  | -0.68898500 | -1.83615500 |
| C | 3.39125100  | -0.94728400 | -2.30716900 |
| H | 3.79890700  | -0.33278000 | -3.10159200 |
| C | 0.24393200  | -1.09718700 | -0.19692200 |
| C | 0.02742700  | -0.60378500 | 1.03946200  |
| H | -1.00910800 | -0.52416400 | 1.36215200  |
| C | 0.98792900  | -0.16521300 | 2.06174700  |
| C | 0.47910700  | 0.07370300  | 3.34894600  |
| C | 2.35415200  | 0.07491800  | 1.84009600  |
| C | 1.29785800  | 0.51214200  | 4.38131200  |
| H | -0.57964700 | -0.08593800 | 3.53440200  |
| C | 3.16913800  | 0.51989700  | 2.87437000  |
| H | 2.78160000  | -0.06245900 | 0.85430500  |
| C | 2.65148400  | 0.73627100  | 4.14900700  |
| H | 0.87587400  | 0.68451800  | 5.36632400  |
| H | 4.21969800  | 0.70609300  | 2.67358500  |
| H | 3.29545800  | 1.08278900  | 4.95076000  |
| N | 1.31509900  | 0.29897300  | -2.43602100 |
| C | 1.93065800  | 1.49206100  | -2.98871300 |
| H | 1.10611800  | 2.13858600  | -3.30527600 |
| H | 2.49342400  | 1.24959100  | -3.89804400 |

|   |             |             |             |
|---|-------------|-------------|-------------|
| H | 0.40893700  | 0.46561600  | -2.02062300 |
| N | -0.81586100 | -1.35438700 | -1.10089800 |
| C | -2.16703000 | -1.07982700 | -0.93873600 |
| C | -3.10527400 | -2.06555400 | -1.28582200 |
| C | -2.65034200 | 0.15458600  | -0.45364900 |
| C | -4.46163300 | -1.84741700 | -1.13070500 |
| H | -2.74775500 | -3.02024200 | -1.65874600 |
| C | -4.01826600 | 0.34467400  | -0.24680900 |
| C | -4.92275400 | -0.64693300 | -0.58910000 |
| H | -5.17040400 | -2.62225400 | -1.40587500 |
| H | -4.37995700 | 1.28766000  | 0.14988200  |
| C | -1.75050300 | 1.32216100  | -0.27202600 |
| O | -0.91028800 | 1.67320500  | -1.06258600 |
| C | -1.94373900 | 2.18278100  | 0.99778400  |
| F | -0.83539900 | 2.84489600  | 1.28509300  |
| F | -2.28245900 | 1.42610200  | 2.04783400  |
| F | -2.93372400 | 3.06731700  | 0.79894600  |
| H | -0.61451400 | -2.11923700 | -1.73191300 |
| C | 2.82626200  | 2.24130600  | -2.01730200 |
| C | 4.03368700  | 2.79320300  | -2.44228000 |
| C | 2.44664600  | 2.38701900  | -0.68101400 |
| C | 4.84794000  | 3.48943900  | -1.55259400 |
| H | 4.34226800  | 2.67245100  | -3.47840900 |
| C | 3.26101500  | 3.07660000  | 0.21104200  |
| H | 1.51028400  | 1.95349400  | -0.33582100 |
| C | 4.46318000  | 3.63115200  | -0.22307700 |
| H | 5.78746100  | 3.91075500  | -1.89627500 |
| H | 2.95602400  | 3.17010200  | 1.24890400  |
| H | 5.09998500  | 4.16623400  | 0.47416500  |
| C | -6.39492800 | -0.46237100 | -0.37503000 |
| F | -6.86765200 | -1.30812000 | 0.55323200  |
| F | -6.69053600 | 0.78064800  | 0.02621200  |
| F | -7.08682900 | -0.70329400 | -1.49892300 |

**IM5a**

|   |             |             |             |
|---|-------------|-------------|-------------|
| P | -0.98095800 | -0.69498400 | 0.26449700  |
| O | -0.85409600 | -1.95396200 | -0.73460300 |
| O | -2.56748900 | -0.51091800 | 0.48114000  |
| O | -0.22845000 | 0.44937700  | -0.26894500 |
| C | -1.56989000 | -3.08955700 | -0.37651900 |
| C | -2.94828900 | -3.08153000 | -0.56873700 |
| C | -0.88513500 | -4.16605000 | 0.18210000  |
| C | -1.65396600 | -5.26655500 | 0.55424500  |
| C | -3.04470600 | -5.28200600 | 0.44242400  |



|   |             |             |             |
|---|-------------|-------------|-------------|
| H | -1.14853500 | -6.12802700 | 0.98437800  |
| C | -3.43862600 | -0.63406500 | -0.59675100 |
| C | -3.58687300 | -1.88757600 | -1.19932900 |
| C | -4.19528500 | 0.47582500  | -0.98508400 |
| C | -5.03272800 | 0.29559200  | -2.08735200 |
| C | -5.09046800 | -0.89194900 | -2.81400000 |
| H | -5.64784100 | 1.13414300  | -2.40420600 |
| C | -4.35507800 | -2.00065700 | -2.37558000 |
| C | -4.32549900 | -3.27731500 | -3.19702700 |
| C | -5.50849700 | -3.40223700 | -4.15333900 |
| H | -6.42836600 | -3.58950100 | -3.58287800 |
| C | -5.66713400 | -2.11891000 | -4.96250300 |
| H | -6.45222500 | -2.22329300 | -5.71698400 |
| C | -5.99417100 | -0.95579500 | -4.03058100 |
| H | -5.94266800 | -0.00348000 | -4.56817900 |
| H | -3.39358700 | -3.26853900 | -3.78012600 |
| C | -3.71074600 | -4.17174000 | -0.09823000 |
| C | -5.22792200 | -4.10321300 | -0.07357900 |
| C | -5.89235900 | -5.47060400 | 0.06197700  |
| H | -5.77039100 | -6.03470400 | -0.87246300 |
| C | -5.26340500 | -6.25254200 | 1.21021300  |
| H | -5.78608900 | -7.19914300 | 1.37516700  |
| C | -3.79193000 | -6.51750900 | 0.90690600  |
| H | -3.72213700 | -7.27966300 | 0.11901000  |
| H | -5.51185900 | -3.47936800 | 0.78631600  |
| H | -7.03196100 | -1.05551400 | -3.68483900 |
| H | -4.73164700 | -1.91383700 | -5.49786700 |
| H | -5.35936800 | -4.26430900 | -4.80999600 |
| H | -4.25789200 | -4.15709000 | -2.55401300 |
| H | -5.61404000 | -3.58026800 | -0.94998300 |
| H | -6.96724400 | -5.34024600 | 0.21766000  |
| H | -5.35274100 | -5.66941800 | 2.13532900  |
| H | -3.28535200 | -6.93689500 | 1.78205400  |
| O | -0.64296200 | -1.21862900 | 1.72010100  |
| H | 0.32267100  | -1.28168900 | 1.85667900  |
| C | 1.96584700  | -3.97198200 | -3.05291700 |
| C | 1.06348900  | -3.98916900 | -2.03117100 |
| C | 1.48731300  | -4.15943500 | -0.67342900 |
| C | 2.88954900  | -4.35422100 | -0.42944400 |
| C | 3.80049300  | -4.35294000 | -1.53294100 |
| C | 3.35783800  | -4.15155100 | -2.80435000 |
| C | 0.58705600  | -4.17019800 | 0.41324000  |
| C | 3.34034500  | -4.55629200 | 0.87613100  |
| C | 2.46425700  | -4.53974000 | 1.96232400  |

|   |             |             |             |
|---|-------------|-------------|-------------|
| C | 1.06599200  | -4.30414100 | 1.73523200  |
| C | 0.20919600  | -4.20638400 | 2.88217400  |
| H | -0.83627800 | -3.96059500 | 2.73370000  |
| C | 0.69914900  | -4.38881500 | 4.14161300  |
| C | 2.07476900  | -4.69581700 | 4.35459700  |
| C | 2.92978300  | -4.75964000 | 3.29776000  |
| H | 1.62239500  | -3.82441600 | -4.07147300 |
| H | 0.00785900  | -3.86185900 | -2.24123600 |
| H | 4.85693500  | -4.51085500 | -1.33143500 |
| H | 4.06286300  | -4.13104600 | -3.62868300 |
| H | 4.39628200  | -4.75595400 | 1.04985100  |
| H | 0.03568200  | -4.29784300 | 4.99534700  |
| H | 2.43773900  | -4.85767100 | 5.36413800  |
| H | 3.98672800  | -4.96115100 | 3.44602400  |
| C | -3.54307000 | 4.13784500  | -3.09924400 |
| C | -3.58712800 | 2.98443000  | -2.37319000 |
| C | -4.04768100 | 2.97559900  | -1.01424700 |
| C | -4.34792600 | 4.24435700  | -0.41087000 |
| C | -4.31136600 | 5.43067000  | -1.21273300 |
| C | -3.94674400 | 5.37866000  | -2.52394500 |
| C | -4.22394700 | 1.78580800  | -0.27089800 |
| C | -4.69945400 | 4.29771400  | 0.93594700  |
| C | -4.81997100 | 3.13828300  | 1.70014000  |
| C | -4.61090600 | 1.85417500  | 1.08780400  |
| C | -4.86398400 | 0.69438600  | 1.89263100  |
| H | -4.76005700 | -0.28981400 | 1.45342700  |
| C | -5.24418900 | 0.80443900  | 3.19768600  |
| C | -5.41848200 | 2.08146200  | 3.80620100  |
| C | -5.21601800 | 3.21080100  | 3.07346400  |
| H | -3.17994200 | 4.11675900  | -4.12159200 |
| H | -3.25544400 | 2.05395300  | -2.81891900 |
| H | -4.58372700 | 6.37296200  | -0.74547300 |
| H | -3.93295100 | 6.28124500  | -3.12696800 |
| H | -4.90991300 | 5.26074500  | 1.39508200  |
| H | -5.42607900 | -0.09254000 | 3.78061300  |
| H | -5.72222600 | 2.14547000  | 4.84620100  |
| H | -5.35571700 | 4.19478500  | 3.51237000  |
| C | 0.66754400  | 5.43506000  | -4.19371400 |
| C | -0.22080100 | 5.40764400  | -3.15043500 |
| C | 0.05406000  | 4.65930000  | -1.97856100 |
| C | 1.26780800  | 3.92580800  | -1.87651200 |
| C | 2.17323200  | 3.98265700  | -2.97199000 |
| C | 1.87863900  | 4.71154800  | -4.09545000 |
| H | -1.77665400 | 5.19069800  | -0.96561500 |

|   |             |             |             |
|---|-------------|-------------|-------------|
| H | 0.45122600  | 6.01094900  | -5.08759600 |
| H | -1.15483700 | 5.96203700  | -3.19717300 |
| C | -0.85430300 | 4.62417800  | -0.89122700 |
| C | 1.53550600  | 3.18525700  | -0.68814600 |
| H | 3.11648900  | 3.45146600  | -2.90189500 |
| H | 2.58709100  | 4.73907500  | -4.91765600 |
| C | 0.61817500  | 3.16123300  | 0.35659100  |
| C | -0.59468100 | 3.89810400  | 0.23521300  |
| H | -1.31081600 | 3.89654200  | 1.04984400  |
| C | 2.82116000  | 2.44825000  | -0.54668700 |
| C | 4.01312500  | 3.03731900  | -0.31441600 |
| N | 0.89708400  | 2.48157300  | 1.53579900  |
| C | -0.18847600 | 2.06960100  | 2.40553700  |
| H | 0.15533500  | 1.18914000  | 2.95950800  |
| H | -1.06311900 | 1.74578200  | 1.82207800  |
| H | 1.61407300  | 1.77799400  | 1.43269900  |
| N | 2.68579200  | 1.04820700  | -0.62737800 |
| C | 3.74742200  | 0.18451900  | -0.85834900 |
| C | 4.63946300  | 0.44701900  | -1.91719400 |
| C | 4.01543300  | -0.93699200 | -0.03452500 |
| C | 5.69335500  | -0.39747900 | -2.19251800 |
| H | 4.44991100  | 1.31493300  | -2.53858500 |
| C | 5.11643000  | -1.76314800 | -0.29646900 |
| C | 5.92895400  | -1.51498300 | -1.38237600 |
| H | 6.33545300  | -0.20646600 | -3.04672200 |
| H | 5.31100300  | -2.61811500 | 0.33804300  |
| C | 3.13317800  | -1.20548400 | 1.10435000  |
| O | 1.93009600  | -1.04215600 | 1.06004800  |
| C | 3.74687500  | -1.46118000 | 2.49810600  |
| F | 4.32369300  | -0.32074500 | 2.89578200  |
| F | 4.68445300  | -2.41490800 | 2.51682500  |
| F | 2.79733400  | -1.77703900 | 3.36798600  |
| H | 1.74493700  | 0.66640200  | -0.51261600 |
| C | -0.62303800 | 3.13102500  | 3.39721000  |
| C | -1.88870700 | 3.03738000  | 3.97862300  |
| C | 0.21217000  | 4.18995500  | 3.74881800  |
| C | -2.30652600 | 3.97857900  | 4.91354100  |
| H | -2.55366400 | 2.22510500  | 3.69032100  |
| C | -0.20856200 | 5.13506500  | 4.68095100  |
| H | 1.18629900  | 4.26712600  | 3.27535000  |
| C | -1.46581100 | 5.03073100  | 5.26896700  |
| H | -3.29436700 | 3.89144500  | 5.35630000  |
| H | 0.44754800  | 5.95869000  | 4.94557000  |
| H | -1.79235300 | 5.76929400  | 5.99435300  |

|   |            |             |             |
|---|------------|-------------|-------------|
| C | 6.99858700 | -2.48965200 | -1.76445800 |
| F | 8.14286400 | -1.87720300 | -2.09529100 |
| F | 7.26721900 | -3.35664900 | -0.77589600 |
| F | 6.63210100 | -3.22261400 | -2.83335400 |
| C | 4.32609300 | 4.47046600  | -0.20620700 |
| C | 5.64731300 | 4.86278800  | -0.47239800 |
| C | 3.41403500 | 5.46512500  | 0.18214400  |
| C | 6.04207100 | 6.19165000  | -0.38525800 |
| H | 6.37247200 | 4.10479500  | -0.75812600 |
| C | 3.81121000 | 6.79386300  | 0.26965700  |
| H | 2.39395800 | 5.19774900  | 0.43020500  |
| C | 5.12137800 | 7.16789300  | -0.01720500 |
| H | 7.07013000 | 6.46366900  | -0.60361900 |
| H | 3.08689100 | 7.54361900  | 0.57254100  |
| H | 5.42306100 | 8.20797200  | 0.05377700  |
| H | 4.88262500 | 2.38972700  | -0.22440100 |

### TS3a

Value of imaginary frequency = -207.66 cm<sup>-1</sup>

|   |            |             |             |
|---|------------|-------------|-------------|
| P | 1.31464000 | -0.14089900 | -0.30817100 |
| O | 2.73745100 | 0.60868100  | -0.45650900 |
| O | 1.75199500 | -1.60643200 | 0.22265400  |
| O | 0.58056400 | -0.10594900 | -1.58257300 |
| C | 3.66214300 | 0.42650300  | 0.56434100  |
| C | 4.33862800 | -0.79107400 | 0.64591500  |
| C | 3.86639600 | 1.46909500  | 1.46631700  |
| C | 4.77693600 | 1.24343400  | 2.49354600  |
| C | 5.42424200 | 0.01599500  | 2.65801600  |
| H | 4.96230000 | 2.04216000  | 3.20798900  |
| C | 2.72420400 | -2.22147100 | -0.55986500 |
| C | 4.04960700 | -1.82217700 | -0.39539000 |
| C | 2.32658100 | -3.18092300 | -1.48896300 |
| C | 3.32506800 | -3.74185300 | -2.27845500 |
| C | 4.65802100 | -3.32912200 | -2.19447500 |
| H | 3.04915400 | -4.50345100 | -3.00414000 |
| C | 5.02762100 | -2.34423400 | -1.26460900 |
| C | 6.42928700 | -1.76115700 | -1.27780700 |
| C | 7.45552900 | -2.68084500 | -1.93350300 |
| H | 7.63670000 | -3.55245600 | -1.29042700 |
| C | 6.94455800 | -3.15124700 | -3.29180000 |
| H | 7.70283800 | -3.74120300 | -3.81490700 |
| C | 5.67600600 | -3.98031200 | -3.11113200 |
| H | 5.20930600 | -4.18801900 | -4.07939800 |
| H | 6.38344800 | -0.81716000 | -1.83941700 |

|   |             |             |             |
|---|-------------|-------------|-------------|
| C | 5.19131000  | -1.02285400 | 1.74329800  |
| C | 5.74868500  | -2.41199000 | 1.99895200  |
| C | 6.95155200  | -2.41299100 | 2.93803200  |
| H | 7.81877900  | -1.97065300 | 2.42980300  |
| C | 6.63592300  | -1.60691700 | 4.19417000  |
| H | 7.45385600  | -1.66938700 | 4.91791300  |
| C | 6.38023500  | -0.14854500 | 3.82411400  |
| H | 7.33555800  | 0.32352100  | 3.55711300  |
| H | 4.94253100  | -3.00869400 | 2.44941100  |
| H | 5.94651500  | -4.95692900 | -2.68707500 |
| H | 6.72938500  | -2.27605000 | -3.91752900 |
| H | 8.40920600  | -2.15451800 | -2.03448900 |
| H | 6.74819800  | -1.48375000 | -0.27099100 |
| H | 5.99306600  | -2.91633800 | 1.06172200  |
| H | 7.21995600  | -3.44311800 | 3.19030000  |
| H | 5.74547400  | -2.02837200 | 4.67723800  |
| H | 5.99678200  | 0.40697400  | 4.68598600  |
| O | 0.62050000  | 0.39974200  | 0.98305700  |
| H | -0.20335500 | 0.98688900  | 0.91039000  |
| C | 4.94650600  | 4.26344300  | -1.57483400 |
| C | 4.60552500  | 3.38222200  | -0.59231800 |
| C | 3.50868100  | 3.64771500  | 0.28947900  |
| C | 2.78027300  | 4.87171300  | 0.11173900  |
| C | 3.17305200  | 5.77033700  | -0.92968500 |
| C | 4.21947800  | 5.47629800  | -1.74997200 |
| C | 3.12603400  | 2.75364300  | 1.30846000  |
| C | 1.69819800  | 5.15341400  | 0.94691400  |
| C | 1.30694300  | 4.27076300  | 1.95341800  |
| C | 2.03278100  | 3.04535200  | 2.14507300  |
| C | 1.57473500  | 2.14225900  | 3.16030100  |
| H | 2.09676600  | 1.20140000  | 3.29401900  |
| C | 0.47623600  | 2.43023200  | 3.91338100  |
| C | -0.23870600 | 3.64943400  | 3.72290200  |
| C | 0.17275900  | 4.54288600  | 2.78206900  |
| H | 5.77946700  | 4.04161500  | -2.23426500 |
| H | 5.16747300  | 2.46274000  | -0.46703100 |
| H | 2.60419200  | 6.68560500  | -1.05991400 |
| H | 4.50196300  | 6.16130600  | -2.54271700 |
| H | 1.14164700  | 6.07643500  | 0.80137200  |
| H | 0.12878700  | 1.71885600  | 4.65566900  |
| H | -1.11911700 | 3.85444100  | 4.32346000  |
| H | -0.36953800 | 5.47026500  | 2.62126900  |
| C | -0.24659200 | -1.63852400 | -4.57166300 |
| C | 0.58060900  | -2.16255200 | -3.62305200 |

|   |             |             |             |
|---|-------------|-------------|-------------|
| C | 0.08014000  | -3.05474100 | -2.61934000 |
| C | -1.31562700 | -3.39502900 | -2.65576100 |
| C | -2.15862000 | -2.79500300 | -3.64680100 |
| C | -1.64169500 | -1.94346100 | -4.57696600 |
| C | 0.89100700  | -3.57233800 | -1.59168200 |
| C | -1.83439700 | -4.28145700 | -1.71439400 |
| C | -1.03322500 | -4.81700200 | -0.70602500 |
| C | 0.34768100  | -4.43586000 | -0.62112600 |
| C | 1.12457900  | -4.95511400 | 0.46581100  |
| H | 2.16873900  | -4.67160500 | 0.54484200  |
| C | 0.57200300  | -5.79199300 | 1.39014900  |
| C | -0.79585800 | -6.18446700 | 1.29200200  |
| C | -1.56867000 | -5.71359600 | 0.27263600  |
| H | 0.15532400  | -0.96746900 | -5.32472500 |
| H | 1.62880700  | -1.88683800 | -3.59904900 |
| H | -3.21905800 | -3.03312600 | -3.63271000 |
| H | -2.28653600 | -1.49490100 | -5.32617200 |
| H | -2.89116300 | -4.53663400 | -1.75096100 |
| H | 1.17739500  | -6.17030000 | 2.20750100  |
| H | -1.21407500 | -6.86114800 | 2.03036500  |
| H | -2.61350000 | -5.99879900 | 0.18593500  |
| C | -7.23301300 | -2.85570000 | -2.30853900 |
| C | -6.57657600 | -3.51693900 | -1.30248700 |
| C | -5.38564100 | -2.99287000 | -0.74442800 |
| C | -4.85817800 | -1.76322000 | -1.22384900 |
| C | -5.56269700 | -1.10055300 | -2.26580200 |
| C | -6.71338300 | -1.63411800 | -2.79076600 |
| H | -5.12964600 | -4.55951700 | 0.72605400  |
| H | -8.14352700 | -3.26370500 | -2.73384100 |
| H | -6.95890800 | -4.45789400 | -0.91577300 |
| C | -4.69788900 | -3.65331000 | 0.30824900  |
| C | -3.64164000 | -1.25436600 | -0.67024600 |
| H | -5.17698000 | -0.16465000 | -2.65764400 |
| H | -7.22954300 | -1.11015500 | -3.58897000 |
| C | -2.92946800 | -1.98302000 | 0.28354200  |
| C | -3.51872200 | -3.17951200 | 0.80080700  |
| H | -3.02249200 | -3.70620500 | 1.60558200  |
| C | -3.25888200 | 0.13580300  | -1.02344200 |
| C | -4.02043800 | 1.23232700  | -0.60369300 |
| N | -1.70789300 | -1.56692600 | 0.74980700  |
| C | -1.05134800 | -2.17594900 | 1.89396800  |
| H | -0.04772100 | -1.74627200 | 1.93573600  |
| H | -0.91882500 | -3.24826500 | 1.70698100  |
| H | -1.46010500 | -0.60488900 | 0.56762500  |

|   |             |             |             |
|---|-------------|-------------|-------------|
| N | -2.12853400 | 0.33047500  | -1.72688800 |
| C | -1.59083300 | 1.60954200  | -1.98581300 |
| C | -0.91546800 | 1.84744900  | -3.17795000 |
| C | -1.69815600 | 2.61719500  | -1.01608100 |
| C | -0.35304100 | 3.09331700  | -3.41524400 |
| H | -0.81807200 | 1.03928500  | -3.89455100 |
| C | -1.11660900 | 3.85769800  | -1.25201800 |
| C | -0.46606900 | 4.09712000  | -2.45908800 |
| H | 0.17901300  | 3.28592900  | -4.34064700 |
| H | -1.16857900 | 4.63713900  | -0.50113100 |
| C | -2.29737100 | 2.28108400  | 0.32547800  |
| O | -1.62571700 | 1.58311800  | 1.11609200  |
| C | -3.18637800 | 3.34311100  | 0.99420500  |
| F | -4.09107000 | 3.88304100  | 0.17229900  |
| F | -2.39369300 | 4.35493000  | 1.40643200  |
| F | -3.79683700 | 2.86167000  | 2.06676000  |
| H | -1.55723100 | -0.46494700 | -2.00877700 |
| C | -1.76667200 | -1.95709500 | 3.21461600  |
| C | -1.92601000 | -3.00773900 | 4.11701700  |
| C | -2.26373200 | -0.69374100 | 3.54751000  |
| C | -2.57396800 | -2.80728200 | 5.33369000  |
| H | -1.54352600 | -3.99317400 | 3.85696100  |
| C | -2.91780900 | -0.49448200 | 4.75951400  |
| H | -2.14117300 | 0.13829100  | 2.85673400  |
| C | -3.07486600 | -1.54994800 | 5.65586200  |
| H | -2.69596600 | -3.63574100 | 6.02449800  |
| H | -3.30709100 | 0.49025100  | 5.00084400  |
| H | -3.58766800 | -1.39307000 | 6.59948100  |
| C | 0.06095600  | 5.46627300  | -2.77128800 |
| F | 1.24912800  | 5.41650700  | -3.38640400 |
| F | -0.76749500 | 6.13757600  | -3.58894400 |
| F | 0.20301400  | 6.21636300  | -1.66515800 |
| C | -5.21759100 | 1.08488200  | 0.24888400  |
| C | -6.39443500 | 1.76016800  | -0.08922300 |
| C | -5.19561600 | 0.32951600  | 1.42959300  |
| C | -7.52966400 | 1.65737900  | 0.70844200  |
| H | -6.41775500 | 2.36656700  | -0.99116100 |
| C | -6.32861600 | 0.22517200  | 2.22396100  |
| H | -4.27653500 | -0.16005200 | 1.73717600  |
| C | -7.50314700 | 0.88405800  | 1.86426400  |
| H | -8.43604600 | 2.18266100  | 0.42419500  |
| H | -6.28628000 | -0.36475100 | 3.13434700  |
| H | -8.38822000 | 0.80259400  | 2.48700300  |
| H | -4.03515800 | 2.08503900  | -1.27796500 |

**IM6a**

|   |            |             |             |
|---|------------|-------------|-------------|
| P | 1.29096000 | -0.05644200 | -0.27507500 |
| O | 2.54057700 | 0.90310600  | -0.61373000 |
| O | 2.01604100 | -1.38451600 | 0.29741400  |
| O | 0.73793600 | -0.40390900 | -1.68966100 |
| C | 3.46953700 | 1.02202700  | 0.42064500  |
| C | 4.38409700 | -0.01441000 | 0.60538600  |
| C | 3.41893800 | 2.14302500  | 1.24431500  |
| C | 4.34613600 | 2.20175700  | 2.28136600  |
| C | 5.24819700 | 1.16687600  | 2.53615800  |
| H | 4.33542500 | 3.07047000  | 2.93542000  |
| C | 3.10443600 | -1.85419200 | -0.43705000 |
| C | 4.31877700 | -1.17415800 | -0.33017100 |
| C | 2.93377400 | -2.96682900 | -1.25785800 |
| C | 4.04103200 | -3.37998700 | -1.99425800 |
| C | 5.25516600 | -2.69150500 | -1.97001700 |
| H | 3.93817200 | -4.25276800 | -2.63491800 |
| C | 5.39544700 | -1.56064300 | -1.15102200 |
| C | 6.64282000 | -0.69954200 | -1.23721400 |
| C | 7.84863500 | -1.44733000 | -1.79940600 |
| H | 8.19735800 | -2.19018800 | -1.06953300 |
| C | 7.46891400 | -2.15246800 | -3.09790500 |
| H | 8.34196100 | -2.62176600 | -3.56073000 |
| C | 6.39830400 | -3.20528500 | -2.82403500 |
| H | 5.99793700 | -3.60260200 | -3.76226900 |
| H | 6.40848400 | 0.14844100  | -1.89645400 |
| C | 5.25337900 | 0.03024200  | 1.71227500  |
| C | 6.08870500 | -1.18262100 | 2.08215700  |
| C | 7.25449100 | -0.84843700 | 3.00868700  |
| H | 8.01376900 | -0.27785700 | 2.45734400  |
| C | 6.76315800 | -0.02351200 | 4.19404900  |
| H | 7.56927000 | 0.15188100  | 4.91243000  |
| C | 6.20641400 | 1.30995200  | 3.70299700  |
| H | 7.04160100 | 1.94942400  | 3.38639200  |
| H | 5.42177700 | -1.89500600 | 2.58875100  |
| H | 6.86019900 | -4.05606700 | -2.30489400 |
| H | 7.08632500 | -1.41118200 | -3.81060300 |
| H | 8.67298200 | -0.74657000 | -1.96086000 |
| H | 6.88197900 | -0.25582900 | -0.26860100 |
| H | 6.44461700 | -1.70281100 | 1.19065600  |
| H | 7.73207800 | -1.77311400 | 3.34574100  |
| H | 5.97870200 | -0.58161900 | 4.72036800  |
| H | 5.70606500 | 1.84369300  | 4.51731100  |



|   |             |             |             |
|---|-------------|-------------|-------------|
| O | 0.33459300  | 0.48360100  | 0.72018100  |
| H | -1.32403500 | 1.49446000  | 1.08511800  |
| C | 3.69809200  | 4.90743900  | -2.01329200 |
| C | 3.60202200  | 4.02364100  | -0.97965200 |
| C | 2.53591100  | 4.11377600  | -0.02741700 |
| C | 1.57776500  | 5.17084000  | -0.18413100 |
| C | 1.72699700  | 6.08959100  | -1.27045800 |
| C | 2.74715300  | 5.95830900  | -2.16354700 |
| C | 2.39831700  | 3.20893900  | 1.04195400  |
| C | 0.51292200  | 5.27254000  | 0.71137000  |
| C | 0.34856800  | 4.35842200  | 1.75130900  |
| C | 1.30586200  | 3.30191200  | 1.92514300  |
| C | 1.07508400  | 2.35134300  | 2.97362000  |
| H | 1.76934900  | 1.52725000  | 3.09418800  |
| C | -0.01872400 | 2.44885700  | 3.78166500  |
| C | -0.96147900 | 3.50555500  | 3.61132000  |
| C | -0.77560100 | 4.43327000  | 2.63299600  |
| H | 4.50856200  | 4.81534200  | -2.72920600 |
| H | 4.33638700  | 3.23256500  | -0.87023400 |
| H | 1.00084900  | 6.88946000  | -1.37048600 |
| H | 2.84259300  | 6.65525100  | -2.98996400 |
| H | -0.21674300 | 6.06732300  | 0.58024100  |
| H | -0.18335200 | 1.70530700  | 4.55555200  |
| H | -1.83444200 | 3.55546100  | 4.25395000  |
| H | -1.49072200 | 5.23665400  | 2.48460500  |
| C | 0.37435000  | -2.55715700 | -4.67261000 |
| C | 1.18672500  | -2.68536700 | -3.58628000 |
| C | 0.83229900  | -3.54963000 | -2.49849000 |
| C | -0.40290300 | -4.27726400 | -2.59155300 |
| C | -1.22884100 | -4.10942800 | -3.74843700 |
| C | -0.85408100 | -3.27749000 | -4.75802300 |
| C | 1.63075700  | -3.68418700 | -1.34727700 |
| C | -0.78255000 | -5.12121200 | -1.55060500 |
| C | -0.00129100 | -5.25735100 | -0.40312900 |
| C | 1.22424200  | -4.51947000 | -0.28847700 |
| C | 1.99307900  | -4.67384600 | 0.91117800  |
| H | 2.92521900  | -4.12726600 | 1.00936900  |
| C | 1.57040000  | -5.48846000 | 1.92031700  |
| C | 0.34994300  | -6.21750900 | 1.80491700  |
| C | -0.40680500 | -6.10551800 | 0.67590600  |
| H | 0.65659600  | -1.88973100 | -5.48063700 |
| H | 2.10255900  | -2.10937700 | -3.51725800 |
| H | -2.16941600 | -4.65144400 | -3.79095900 |
| H | -1.49077100 | -3.14996300 | -5.62729900 |

|   |             |             |             |
|---|-------------|-------------|-------------|
| H | -1.71967000 | -5.66727900 | -1.62464000 |
| H | 2.16533400  | -5.58584700 | 2.82249300  |
| H | 0.03256800  | -6.86410700 | 2.61688800  |
| H | -1.33770700 | -6.65743400 | 0.57158800  |
| C | -6.37874500 | -3.32835600 | -2.89299000 |
| C | -5.73305000 | -4.04073400 | -1.91367400 |
| C | -4.62666600 | -3.49208800 | -1.22340800 |
| C | -4.17431300 | -2.18340100 | -1.54391500 |
| C | -4.85275500 | -1.47682500 | -2.57324100 |
| C | -5.92547000 | -2.03290500 | -3.22507500 |
| H | -4.31971300 | -5.18382400 | 0.09080800  |
| H | -7.22673300 | -3.75652700 | -3.41654300 |
| H | -6.06350500 | -5.04199200 | -1.64967100 |
| C | -3.95235500 | -4.20078000 | -0.19364100 |
| C | -3.06735200 | -1.62726000 | -0.84022000 |
| H | -4.49606200 | -0.49419000 | -2.87038900 |
| H | -6.42408600 | -1.47516900 | -4.01164400 |
| C | -2.37423700 | -2.37398400 | 0.11319600  |
| C | -2.86723500 | -3.67526400 | 0.44220300  |
| H | -2.37995500 | -4.23701400 | 1.22954900  |
| C | -2.82134900 | -0.16973800 | -0.96849500 |
| C | -3.87718200 | 0.79394400  | -0.39720100 |
| N | -1.27088600 | -1.86776400 | 0.74849100  |
| C | -0.64366100 | -2.47448400 | 1.91039500  |
| H | 0.34048900  | -2.00516500 | 1.99987900  |
| H | -0.46352100 | -3.53629700 | 1.72189400  |
| H | -1.10864500 | -0.87073100 | 0.67378900  |
| N | -1.74485500 | 0.28645700  | -1.50543700 |
| C | -1.58905300 | 1.68951900  | -1.65024000 |
| C | -0.75025400 | 2.14241500  | -2.66700000 |
| C | -2.27703900 | 2.59746600  | -0.82753600 |
| C | -0.65860300 | 3.50309600  | -2.93383700 |
| H | -0.20088800 | 1.41800800  | -3.25796200 |
| C | -2.17957500 | 3.95622900  | -1.10095300 |
| C | -1.39923300 | 4.39552800  | -2.17020000 |
| H | -0.02571800 | 3.86798800  | -3.73449700 |
| H | -2.71820400 | 4.68560400  | -0.50955700 |
| C | -3.08661000 | 1.94888000  | 0.28684400  |
| O | -2.26926100 | 1.45955100  | 1.32295800  |
| C | -4.05958000 | 2.93017200  | 0.95012300  |
| F | -4.97434700 | 3.35656300  | 0.06222200  |
| F | -3.42302700 | 4.01546700  | 1.42270700  |
| F | -4.70022700 | 2.39299400  | 1.98220900  |
| H | -0.29190600 | -0.35047900 | -1.71814200 |

|   |             |             |             |
|---|-------------|-------------|-------------|
| C | -1.42302100 | -2.28797900 | 3.19701900  |
| C | -1.86796800 | -3.37694700 | 3.94304100  |
| C | -1.71321800 | -0.99450600 | 3.64255900  |
| C | -2.60184000 | -3.18343100 | 5.11276500  |
| H | -1.63312500 | -4.38437600 | 3.60442100  |
| C | -2.45340200 | -0.79791200 | 4.80253100  |
| H | -1.37313300 | -0.13892400 | 3.06086400  |
| C | -2.89926900 | -1.89410700 | 5.54191200  |
| H | -2.94550300 | -4.04014400 | 5.68404800  |
| H | -2.68821300 | 0.21171500  | 5.12642300  |
| H | -3.47709400 | -1.74123000 | 6.44795000  |
| C | -1.45674100 | 5.84931300  | -2.53830500 |
| F | -0.46925700 | 6.20882700  | -3.36728300 |
| F | -2.61356600 | 6.14775300  | -3.15034400 |
| F | -1.38975100 | 6.64965300  | -1.45600200 |
| C | -4.91291700 | 0.11303200  | 0.47048500  |
| C | -6.25644400 | 0.15249800  | 0.10583000  |
| C | -4.54039500 | -0.56738400 | 1.63272400  |
| C | -7.21715100 | -0.49203200 | 0.88206600  |
| H | -6.55289200 | 0.67720600  | -0.79901700 |
| C | -5.49613900 | -1.20967300 | 2.40756700  |
| H | -3.49848200 | -0.58780600 | 1.93061800  |
| C | -6.83818200 | -1.17646500 | 2.03123400  |
| H | -8.25964300 | -0.46222100 | 0.58214900  |
| H | -5.18292900 | -1.73793200 | 3.30351000  |
| H | -7.58569300 | -1.68446100 | 2.63239500  |
| H | -4.39385800 | 1.25056200  | -1.25378600 |

#### IM7a

|   |            |             |             |
|---|------------|-------------|-------------|
| C | 3.42218500 | -4.52723600 | -1.29976500 |
| C | 4.15004200 | -3.37827200 | -1.47545000 |
| C | 3.51243100 | -2.11582900 | -1.54118400 |
| C | 2.09961800 | -2.03113000 | -1.41408100 |
| C | 1.37234200 | -3.24115700 | -1.25416200 |
| C | 2.01528900 | -4.45188400 | -1.19549800 |
| H | 5.32754200 | -0.96729900 | -1.79155800 |
| H | 3.91789100 | -5.49082400 | -1.25166600 |
| H | 5.23189600 | -3.41773500 | -1.57108700 |
| C | 4.24422400 | -0.91428500 | -1.72580500 |
| C | 1.46009100 | -0.75885700 | -1.46199400 |
| H | 0.28741500 | -3.20744400 | -1.20645500 |
| H | 1.43664500 | -5.36261300 | -1.07671000 |
| C | 2.19747100 | 0.39629600  | -1.73879500 |
| C | 3.61901300 | 0.29384700  | -1.83491300 |

|   |             |             |             |
|---|-------------|-------------|-------------|
| H | 4.20850200  | 1.19224200  | -1.97281200 |
| C | 0.03793800  | -0.61711900 | -1.07152200 |
| C | -0.39672500 | -1.03351800 | 0.35245600  |
| H | -1.00030200 | -1.94804000 | 0.25880900  |
| C | 0.75744800  | -1.31568500 | 1.29241400  |
| C | 0.83611600  | -2.54955900 | 1.93517900  |
| C | 1.75261100  | -0.36264300 | 1.52566100  |
| C | 1.89520900  | -2.83671000 | 2.79181100  |
| H | 0.06695100  | -3.29739400 | 1.75683300  |
| C | 2.81084600  | -0.64887900 | 2.37859000  |
| H | 1.70608800  | 0.59811000  | 1.02511300  |
| C | 2.88614300  | -1.88706600 | 3.01299500  |
| H | 1.94704800  | -3.80516500 | 3.27848200  |
| H | 3.58171700  | 0.09832200  | 2.53922900  |
| H | 3.71732500  | -2.11141100 | 3.67380500  |
| N | 1.58600700  | 1.62157100  | -1.84214900 |
| C | 2.29771900  | 2.86793200  | -1.99160900 |
| H | 1.55247600  | 3.62414100  | -2.25700200 |
| H | 3.00988200  | 2.83218000  | -2.82865800 |
| H | -1.32504700 | 1.96668500  | 1.15323000  |
| N | -0.77920800 | -0.06817100 | -1.89506600 |
| C | -2.11875800 | 0.10771000  | -1.50836500 |
| C | -3.05785700 | 0.25981800  | -2.52787300 |
| C | -2.52205500 | 0.13518900  | -0.16078100 |
| C | -4.40377100 | 0.41139000  | -2.22532500 |
| H | -2.70284500 | 0.24503600  | -3.55223900 |
| C | -3.87125700 | 0.29505500  | 0.13621400  |
| C | -4.80228800 | 0.42321600  | -0.89411900 |
| H | -5.14004100 | 0.52600000  | -3.01285100 |
| H | -4.22451500 | 0.31966700  | 1.15944200  |
| C | -1.38309100 | 0.04851700  | 0.85178800  |
| O | -0.68803700 | 1.27827800  | 0.91963800  |
| C | -1.89584300 | -0.26056100 | 2.26351500  |
| F | -0.93080500 | -0.34202700 | 3.17052100  |
| F | -2.59780200 | -1.39976000 | 2.29036900  |
| F | -2.71046800 | 0.73901800  | 2.67407100  |
| H | 0.59612200  | 1.60619500  | -2.02863300 |
| C | 3.02031400  | 3.29902900  | -0.72691800 |
| C | 4.29984200  | 3.84740100  | -0.78316100 |
| C | 2.39509900  | 3.15622500  | 0.51349200  |
| C | 4.95048900  | 4.24772400  | 0.38194000  |
| H | 4.79559200  | 3.95511700  | -1.74552100 |
| C | 3.04461500  | 3.55027000  | 1.67835100  |
| H | 1.39970700  | 2.71993500  | 0.55627100  |

|   |             |             |             |
|---|-------------|-------------|-------------|
| C | 4.32526100  | 4.09690600  | 1.61520200  |
| H | 5.94974200  | 4.66757000  | 0.32552100  |
| H | 2.55117300  | 3.42706500  | 2.63760100  |
| H | 4.83394100  | 4.40021300  | 2.52454000  |
| C | -6.25634500 | 0.52957900  | -0.53674400 |
| F | -6.78675400 | -0.67021100 | -0.25271500 |
| F | -6.44278800 | 1.29879000  | 0.54695800  |
| F | -6.97964800 | 1.05365100  | -1.53581800 |

**IM2-II**

|   |             |             |             |
|---|-------------|-------------|-------------|
| P | -0.71829600 | -0.73531900 | -0.98304500 |
| O | -1.89149800 | -0.35575100 | 0.13385100  |
| O | -0.94023200 | -2.35774700 | -1.12168800 |
| O | 0.58455000  | -0.47625900 | -0.27934800 |
| C | -3.07851400 | -1.05435800 | 0.15787300  |
| C | -3.08151400 | -2.38423600 | 0.59457200  |
| C | -4.26253200 | -0.41505800 | -0.21629900 |
| C | -5.44303900 | -1.15066500 | -0.16663700 |
| C | -5.47134700 | -2.49781900 | 0.18839400  |
| H | -6.36968300 | -0.65660400 | -0.45014500 |
| C | -0.76963100 | -3.06057200 | 0.05371600  |
| C | -1.79306100 | -3.01566500 | 1.00192400  |
| C | 0.39376900  | -3.81031800 | 0.25202700  |
| C | 0.53666700  | -4.43145700 | 1.49093400  |
| C | -0.40745800 | -4.30514300 | 2.51198500  |
| H | 1.43076400  | -5.02433000 | 1.67131300  |
| C | -1.58781300 | -3.59035300 | 2.27305800  |
| C | -2.59500100 | -3.39555900 | 3.39098800  |
| C | -2.52039900 | -4.50333300 | 4.43858100  |
| H | -2.83232000 | -5.45662600 | 3.99067400  |
| C | -1.09221500 | -4.62516500 | 4.96134200  |
| H | -1.02759600 | -5.36852900 | 5.76159800  |
| C | -0.13028700 | -5.00092500 | 3.83302700  |
| H | 0.90418700  | -4.79616300 | 4.13233800  |
| H | -2.38528000 | -2.43054700 | 3.87639300  |
| C | -4.27523900 | -3.13447400 | 0.54865800  |
| C | -4.25435400 | -4.63783700 | 0.77132100  |
| C | -5.62579700 | -5.21942900 | 1.10382000  |
| H | -5.92646200 | -4.90347200 | 2.11203000  |
| C | -6.66257300 | -4.73914300 | 0.09377000  |
| H | -7.63223000 | -5.21575000 | 0.26626100  |
| C | -6.80334100 | -3.22268200 | 0.18395100  |
| H | -7.33923000 | -2.97069600 | 1.10940000  |
| H | -3.88628500 | -5.09950600 | -0.15649800 |

|   |             |             |             |
|---|-------------|-------------|-------------|
| H | -0.18833800 | -6.08400100 | 3.66215400  |
| H | -0.80043000 | -3.66470800 | 5.40578100  |
| H | -3.21517700 | -4.29067800 | 5.25662700  |
| H | -3.60709600 | -3.30455600 | 2.99132800  |
| H | -3.53049500 | -4.91660100 | 1.53824000  |
| H | -5.56670000 | -6.31196000 | 1.11645000  |
| H | -6.33892500 | -5.02236100 | -0.91572700 |
| H | -7.41894900 | -2.84166000 | -0.63737900 |
| O | -1.01446600 | -0.10239100 | -2.29781800 |
| C | -4.74363500 | 2.80382100  | 2.56033100  |
| C | -4.50356400 | 1.79571300  | 1.67427200  |
| C | -4.52173000 | 2.03445000  | 0.26178400  |
| C | -4.75891300 | 3.37543900  | -0.19676800 |
| C | -5.02336600 | 4.40149700  | 0.76686100  |
| C | -5.02871600 | 4.12369900  | 2.10105400  |
| C | -4.32819600 | 1.00243600  | -0.67638400 |
| C | -4.76964800 | 3.64087500  | -1.56657400 |
| C | -4.56856000 | 2.62887800  | -2.50501300 |
| C | -4.33127300 | 1.28435200  | -2.05682900 |
| C | -4.10176700 | 0.26980500  | -3.04280300 |
| H | -3.86952200 | -0.73639100 | -2.71257200 |
| C | -4.14262300 | 0.56838300  | -4.37252200 |
| C | -4.41224200 | 1.89709200  | -4.81513000 |
| C | -4.60777800 | 2.89587500  | -3.90991800 |
| H | -4.72542200 | 2.60433900  | 3.62666300  |
| H | -4.29735100 | 0.79066100  | 2.02736200  |
| H | -5.22984000 | 5.40549100  | 0.40500100  |
| H | -5.24387500 | 4.90437500  | 2.82394900  |
| H | -4.95644300 | 4.65532900  | -1.91132200 |
| H | -3.95604900 | -0.21011400 | -5.10467200 |
| H | -4.44420400 | 2.11041100  | -5.87899500 |
| H | -4.78660800 | 3.91687500  | -4.23497800 |
| C | 4.49107200  | -2.72485300 | 0.86761400  |
| C | 3.17269700  | -2.96137400 | 0.60726100  |
| C | 2.76735900  | -3.70535200 | -0.54946500 |
| C | 3.78935800  | -4.12403100 | -1.46859400 |
| C | 5.16325600  | -3.89078600 | -1.13728700 |
| C | 5.50697900  | -3.22818400 | 0.00184700  |
| C | 1.41770900  | -4.02407100 | -0.80899800 |
| C | 3.42581800  | -4.75010700 | -2.65900400 |
| C | 2.08997800  | -5.00985700 | -2.96260900 |
| C | 1.06448400  | -4.67099100 | -2.01455400 |
| C | -0.28191500 | -5.04390600 | -2.33416200 |
| H | -1.07140500 | -4.82964200 | -1.62426300 |

|   |             |             |             |
|---|-------------|-------------|-------------|
| C | -0.58552600 | -5.65863500 | -3.51193900 |
| C | 0.43148600  | -5.96059100 | -4.46285900 |
| C | 1.72802200  | -5.65011400 | -4.18994900 |
| H | 4.77081500  | -2.14380000 | 1.74143800  |
| H | 2.40688000  | -2.56966300 | 1.26837100  |
| H | 5.92590000  | -4.24314000 | -1.82674300 |
| H | 6.54907300  | -3.04124100 | 0.23459500  |
| H | 4.19990900  | -5.05251600 | -3.36080200 |
| H | -1.61492100 | -5.92370900 | -3.73033400 |
| H | 0.16724300  | -6.44599800 | -5.39679800 |
| H | 2.51878900  | -5.88681900 | -4.89647700 |
| C | -1.36682800 | 6.40109500  | 3.84692300  |
| C | -0.16086800 | 5.77881000  | 4.11544600  |
| C | 0.28409900  | 4.71805200  | 3.31218900  |
| C | -0.49686800 | 4.28516600  | 2.22451800  |
| C | -1.71587900 | 4.91616000  | 1.96643400  |
| C | -2.14356300 | 5.96129700  | 2.77053900  |
| H | 2.12082600  | 4.40985200  | 4.42980800  |
| H | -1.70863200 | 7.22137600  | 4.46838100  |
| H | 0.45471300  | 6.10352900  | 4.94944900  |
| C | 1.53770600  | 4.05333000  | 3.58435500  |
| C | 0.00954900  | 3.19559200  | 1.36570300  |
| H | -2.33171200 | 4.57513100  | 1.13965800  |
| H | -3.09547900 | 6.43657700  | 2.55632800  |
| C | 1.24702400  | 2.49909100  | 1.74570300  |
| C | 2.00361300  | 3.00855900  | 2.86429300  |
| H | 2.93161900  | 2.52340700  | 3.13588900  |
| C | -0.61027200 | 2.89410500  | 0.22757400  |
| C | -1.26666300 | 2.69473000  | -0.88015500 |
| C | -1.08022700 | 3.47138700  | -2.12531900 |
| C | -1.39001800 | 2.86736200  | -3.34809600 |
| C | -0.58680300 | 4.78079300  | -2.09477700 |
| C | -1.19829200 | 3.57467300  | -4.53093700 |
| H | -1.74842000 | 1.84017000  | -3.35652300 |
| C | -0.40199900 | 5.47896800  | -3.28060600 |
| H | -0.33945100 | 5.23806200  | -1.14116100 |
| C | -0.70757200 | 4.87678300  | -4.50032600 |
| H | -1.43923200 | 3.10268500  | -5.47805700 |
| H | -0.01781100 | 6.49326000  | -3.25353800 |
| H | -0.56195600 | 5.42463400  | -5.42596400 |
| N | 1.62978800  | 1.43432800  | 1.09487200  |
| C | 2.77235100  | 0.59076800  | 1.44812000  |
| H | 2.91357600  | -0.07809400 | 0.59180000  |
| H | 3.67270900  | 1.20330000  | 1.54863800  |

|   |             |             |             |
|---|-------------|-------------|-------------|
| C | 2.51225100  | -0.22053000 | 2.69975600  |
| C | 1.28288400  | -0.86379300 | 2.87578300  |
| C | 3.51010900  | -0.36611400 | 3.66307600  |
| C | 1.06383600  | -1.63309900 | 4.01272500  |
| H | 0.51525200  | -0.77833100 | 2.10827700  |
| C | 3.29039700  | -1.15021600 | 4.79398200  |
| H | 4.46742100  | 0.13191000  | 3.52345800  |
| C | 2.06364100  | -1.78111000 | 4.97242500  |
| H | 0.10579600  | -2.12636600 | 4.13917500  |
| H | 4.07451200  | -1.25909600 | 5.53623600  |
| H | 1.88504900  | -2.38573600 | 5.85649200  |
| H | -1.98214700 | 1.86915000  | -0.89901300 |
| H | 1.01132300  | 0.96149200  | 0.38994700  |
| C | 4.32091600  | -0.53975900 | -1.86950200 |
| C | 5.26845400  | 0.34942400  | -1.31325300 |
| C | 4.91037300  | 1.64811100  | -1.04954800 |
| C | 3.61325900  | 2.12221300  | -1.33926600 |
| C | 2.66870400  | 1.24272700  | -1.96324400 |
| C | 3.06054100  | -0.10956900 | -2.18312200 |
| H | 4.59854100  | -1.57280700 | -2.04981200 |
| H | 5.64431100  | 2.31119400  | -0.60656700 |
| H | 2.32844400  | -0.79374800 | -2.59966600 |
| N | 1.44384700  | 1.63851300  | -2.31798500 |
| H | 1.17203500  | 2.60001600  | -2.17396700 |
| H | 0.72144400  | 0.95986500  | -2.55800700 |
| C | 6.62653400  | -0.12468200 | -0.91296800 |
| F | 7.04250900  | -1.16459400 | -1.65130800 |
| F | 7.54991700  | 0.84530800  | -1.02599700 |
| F | 6.66946600  | -0.52521000 | 0.37713700  |
| C | 3.17761400  | 3.42310000  | -0.86681000 |
| O | 2.09014500  | 3.94098400  | -1.06895900 |
| C | 4.12614900  | 4.21588400  | 0.06759100  |
| F | 4.47281800  | 3.47856900  | 1.14295400  |
| F | 3.53857200  | 5.31703300  | 0.51049200  |
| F | 5.25895300  | 4.56718200  | -0.55634800 |

**IM2-II'**

|   |             |             |             |
|---|-------------|-------------|-------------|
| P | -1.36583400 | -0.00304200 | -0.95144000 |
| O | -2.34342300 | 0.64534400  | 0.22149600  |
| O | -2.46641700 | -0.92330000 | -1.74928500 |
| O | -0.41341700 | -0.85930000 | -0.17109800 |
| C | -3.53461800 | 1.21559600  | -0.15158000 |
| C | -4.58717500 | 0.38460400  | -0.56180200 |
| C | -3.68423400 | 2.60450400  | -0.06347400 |



|   |             |             |             |
|---|-------------|-------------|-------------|
| C | -4.90970600 | 3.13468900  | -0.46753400 |
| C | -5.92823500 | 2.35269700  | -1.00955500 |
| H | -5.05617800 | 4.20984400  | -0.39167900 |
| C | -3.32175700 | -1.70925900 | -1.01888200 |
| C | -4.42682500 | -1.09470500 | -0.42214800 |
| C | -3.08140300 | -3.08796900 | -0.90666900 |
| C | -4.04580700 | -3.83850600 | -0.23799000 |
| C | -5.13681400 | -3.25853100 | 0.41052100  |
| H | -3.91045000 | -4.91568000 | -0.17314700 |
| C | -5.31208500 | -1.86708400 | 0.36148800  |
| C | -6.37868100 | -1.20139900 | 1.21736900  |
| C | -7.48109400 | -2.15640600 | 1.66708300  |
| H | -8.11600300 | -2.41634300 | 0.80921500  |
| C | -6.87599500 | -3.42965200 | 2.24810700  |
| H | -7.65106700 | -4.08333400 | 2.65937500  |
| C | -6.09394900 | -4.16301100 | 1.16331100  |
| H | -5.53630100 | -5.00320400 | 1.59003600  |
| H | -5.88222400 | -0.78639200 | 2.10709000  |
| C | -5.76147300 | 0.96288400  | -1.08335600 |
| C | -6.78885900 | 0.10859400  | -1.80566300 |
| C | -8.16286600 | 0.76707100  | -1.89334700 |
| H | -8.62499400 | 0.79779000  | -0.89694300 |
| C | -8.02833100 | 2.18800000  | -2.43253600 |
| H | -9.01004800 | 2.64622200  | -2.58635200 |
| C | -7.20435500 | 3.03460900  | -1.46637000 |
| H | -7.81529600 | 3.25756900  | -0.58078400 |
| H | -6.41006900 | -0.06055700 | -2.82365500 |
| H | -6.80398400 | -4.59877400 | 0.44699200  |
| H | -6.20321000 | -3.16629600 | 3.07477800  |
| H | -8.12296700 | -1.65547900 | 2.39809300  |
| H | -6.81213200 | -0.33848300 | 0.71049000  |
| H | -6.86431100 | -0.88365600 | -1.35686700 |
| H | -8.81918200 | 0.16674000  | -2.53077200 |
| H | -7.53225400 | 2.15351300  | -3.41068400 |
| H | -6.95756400 | 4.00194600  | -1.91629600 |
| O | -0.87335400 | 1.02418800  | -1.90552200 |
| C | -1.85602000 | 2.20250200  | 3.85337000  |
| C | -2.41389700 | 2.30889400  | 2.61339300  |
| C | -2.09106500 | 3.39877900  | 1.73896500  |
| C | -1.19698300 | 4.40697600  | 2.24106200  |
| C | -0.66040900 | 4.27651500  | 3.56227600  |
| C | -0.96514800 | 3.20140500  | 4.34142600  |
| C | -2.62086600 | 3.52522700  | 0.43353900  |
| C | -0.87196600 | 5.50575500  | 1.44665000  |

|   |             |             |             |
|---|-------------|-------------|-------------|
| C | -1.35689000 | 5.62654400  | 0.14736600  |
| C | -2.22045500 | 4.60790100  | -0.38315900 |
| C | -2.60801800 | 4.72256200  | -1.76015000 |
| H | -3.18888500 | 3.92358400  | -2.20591700 |
| C | -2.22541700 | 5.79125300  | -2.51651800 |
| C | -1.42866300 | 6.83411200  | -1.96070100 |
| C | -0.99802700 | 6.74299500  | -0.67272600 |
| H | -2.09592400 | 1.34624000  | 4.47579300  |
| H | -3.10000100 | 1.54268100  | 2.27472900  |
| H | -0.00246200 | 5.06241700  | 3.92659300  |
| H | -0.54510400 | 3.10671400  | 5.33789600  |
| H | -0.21371100 | 6.27577400  | 1.84365100  |
| H | -2.52269400 | 5.84571800  | -3.55901400 |
| H | -1.14795100 | 7.68296200  | -2.57606600 |
| H | -0.35875400 | 7.50889400  | -0.24192000 |
| C | -0.46579800 | -5.20099800 | 1.79766100  |
| C | -1.31208200 | -4.56648900 | 0.93471500  |
| C | -0.95145200 | -4.32846600 | -0.43511300 |
| C | 0.35898900  | -4.75275200 | -0.84692200 |
| C | 1.23234300  | -5.37690400 | 0.09872600  |
| C | 0.83057200  | -5.61564900 | 1.37814900  |
| C | -1.79567400 | -3.68027100 | -1.37078600 |
| C | 0.77624300  | -4.54205100 | -2.15985000 |
| C | -0.07138200 | -3.97247100 | -3.10597200 |
| C | -1.38339700 | -3.54294500 | -2.71200600 |
| C | -2.23819700 | -2.99799200 | -3.72468400 |
| H | -3.23950600 | -2.68678000 | -3.44926800 |
| C | -1.81635000 | -2.87468000 | -5.01358800 |
| C | -0.50196400 | -3.27700800 | -5.39318500 |
| C | 0.34055200  | -3.80910300 | -4.46697500 |
| H | -0.77504300 | -5.36164500 | 2.82613700  |
| H | -2.26850100 | -4.21775000 | 1.30190700  |
| H | 2.22538700  | -5.65828900 | -0.23671000 |
| H | 1.49551400  | -6.10685100 | 2.08195600  |
| H | 1.78127900  | -4.84034900 | -2.44977500 |
| H | -2.48413200 | -2.46176400 | -5.76257000 |
| H | -0.18196200 | -3.16007900 | -6.42359900 |
| H | 1.34234300  | -4.12819300 | -4.74090300 |
| C | 7.52547100  | 0.93461100  | 1.84030200  |
| C | 6.92289700  | -0.24821300 | 2.23375700  |
| C | 5.52575400  | -0.34650900 | 2.28297300  |
| C | 4.72858200  | 0.75189400  | 1.91492300  |
| C | 5.34645900  | 1.94315100  | 1.53109100  |
| C | 6.73122500  | 2.03308500  | 1.50142700  |

|   |             |             |             |
|---|-------------|-------------|-------------|
| H | 5.51452600  | -2.39608300 | 3.00016700  |
| H | 8.60576500  | 1.00650700  | 1.78466600  |
| H | 7.52298200  | -1.11353700 | 2.50030400  |
| C | 4.87858500  | -1.57720900 | 2.67497700  |
| C | 3.25624400  | 0.59949200  | 1.92675800  |
| H | 4.73660500  | 2.78548800  | 1.21968100  |
| H | 7.19883500  | 2.95718100  | 1.18094600  |
| C | 2.67236600  | -0.74181000 | 2.10339600  |
| C | 3.54392900  | -1.77880600 | 2.61055800  |
| H | 3.13865100  | -2.74946900 | 2.85760000  |
| C | 2.49312200  | 1.68378400  | 1.85882300  |
| C | 1.95116200  | 2.86563700  | 1.80739800  |
| C | 1.69821300  | 3.53132100  | 0.49790900  |
| C | 0.77456400  | 3.00266500  | -0.39651200 |
| C | 2.43603200  | 4.66927700  | 0.15452400  |
| C | 0.60339800  | 3.58404200  | -1.65269100 |
| H | 0.17253200  | 2.14623300  | -0.11714000 |
| C | 2.26168200  | 5.25038300  | -1.09646300 |
| H | 3.14852000  | 5.08793500  | 0.86039200  |
| C | 1.35184300  | 4.70362200  | -2.00303400 |
| H | -0.11859200 | 3.13842300  | -2.32789300 |
| H | 2.83715500  | 6.13076200  | -1.36496900 |
| H | 1.21367800  | 5.16515100  | -2.97558200 |
| N | 1.42162300  | -0.96222200 | 1.81711100  |
| C | 0.64634100  | -2.18578000 | 2.05226000  |
| H | 0.29282600  | -2.51026600 | 1.07435800  |
| H | 1.28933200  | -2.95833800 | 2.46667300  |
| C | -0.50782300 | -1.89058100 | 2.98749600  |
| C | -1.78713500 | -1.65781800 | 2.48047600  |
| C | -0.29918800 | -1.84856400 | 4.36715500  |
| C | -2.84662800 | -1.40708200 | 3.34758100  |
| H | -1.94024200 | -1.67056200 | 1.40678100  |
| C | -1.35787900 | -1.59617700 | 5.23448500  |
| H | 0.69730100  | -2.02520700 | 4.76713400  |
| C | -2.63705500 | -1.38091100 | 4.72452900  |
| H | -3.83723200 | -1.23817200 | 2.93558700  |
| H | -1.18733300 | -1.57617500 | 6.30613000  |
| H | -3.46621300 | -1.19209500 | 5.39965100  |
| H | 1.72264500  | 3.38872600  | 2.73736400  |
| H | 0.88137100  | -0.27320200 | 1.27859700  |
| C | 5.07252000  | 1.80314600  | -1.85677800 |
| C | 6.03224700  | 0.80187300  | -1.58738300 |
| C | 5.61808100  | -0.44863900 | -1.20396100 |
| C | 4.24529000  | -0.76099700 | -1.07487100 |

|   |            |             |             |
|---|------------|-------------|-------------|
| C | 3.26685900 | 0.24622900  | -1.36409500 |
| C | 3.73576800 | 1.54008300  | -1.74750500 |
| H | 5.40281600 | 2.79789000  | -2.14180600 |
| H | 6.36920500 | -1.19895500 | -0.99051100 |
| H | 3.00064100 | 2.31405100  | -1.94784800 |
| N | 1.95188300 | 0.03972500  | -1.26345800 |
| H | 1.55790100 | -0.86171200 | -1.01831000 |
| H | 1.28012900 | 0.72930800  | -1.59251900 |
| C | 7.48242700 | 1.11163700  | -1.75804300 |
| F | 7.78975900 | 2.33656300  | -1.28613500 |
| F | 8.27084500 | 0.22998800  | -1.12307000 |
| F | 7.85826000 | 1.10984800  | -3.04907100 |
| C | 3.81873900 | -2.09296700 | -0.67629300 |
| O | 2.67047300 | -2.44877100 | -0.46459600 |
| C | 4.89886600 | -3.19887900 | -0.54081900 |
| F | 5.52837600 | -3.39445700 | -1.70529200 |
| F | 4.34655200 | -4.34813900 | -0.16852500 |
| F | 5.83876000 | -2.89123700 | 0.37421300  |

## TS2-II

Value of imaginary frequency = -279.12 cm<sup>-1</sup>

|   |             |             |             |
|---|-------------|-------------|-------------|
| P | -1.19452400 | -0.05928300 | -0.88636700 |
| O | -1.75372500 | 1.01069400  | 0.24873300  |
| O | -2.57545100 | -0.83669600 | -1.30513800 |
| O | -0.29482800 | -0.98821300 | -0.12819700 |
| C | -3.04943300 | 1.46550300  | 0.30097000  |
| C | -4.10461200 | 0.56202000  | 0.49490400  |
| C | -3.28244800 | 2.84630600  | 0.24737400  |
| C | -4.60914100 | 3.27367900  | 0.29468500  |
| C | -5.68720600 | 2.39425000  | 0.34504700  |
| H | -4.80356900 | 4.34328700  | 0.26141000  |
| C | -3.11261300 | -1.57206800 | -0.26795700 |
| C | -3.81283900 | -0.88525000 | 0.71948100  |
| C | -2.92828000 | -2.95835800 | -0.23558100 |
| C | -3.41381600 | -3.62664300 | 0.88388700  |
| C | -4.01915200 | -2.96023200 | 1.95368500  |
| H | -3.29241700 | -4.70649300 | 0.93802100  |
| C | -4.22691700 | -1.57694100 | 1.87911000  |
| C | -4.83987800 | -0.83642300 | 3.05397500  |
| C | -5.69758800 | -1.74342400 | 3.93237400  |
| H | -6.58596500 | -2.06474900 | 3.37168600  |
| C | -4.89280800 | -2.96630600 | 4.36021200  |
| H | -5.46611000 | -3.59418700 | 5.04891400  |
| C | -4.47301000 | -3.78874800 | 3.14236900  |

|   |             |             |             |
|---|-------------|-------------|-------------|
| H | -3.67384400 | -4.48688500 | 3.41529000  |
| H | -4.02459000 | -0.41508300 | 3.66099600  |
| C | -5.43803700 | 1.01873000  | 0.43135400  |
| C | -6.59115900 | 0.03163300  | 0.35691800  |
| C | -7.93860800 | 0.64821000  | 0.72251000  |
| H | -7.96771000 | 0.86058600  | 1.80003800  |
| C | -8.15446300 | 1.94343100  | -0.05348700 |
| H | -9.15302000 | 2.35163300  | 0.12944900  |
| C | -7.09276000 | 2.96440200  | 0.34396800  |
| H | -7.31831900 | 3.33680300  | 1.35267200  |
| H | -6.63644900 | -0.33780000 | -0.67801200 |
| H | -5.32154600 | -4.40690200 | 2.81987500  |
| H | -4.00456000 | -2.62959700 | 4.90924800  |
| H | -6.05338300 | -1.18725000 | 4.80488100  |
| H | -5.41604300 | 0.02548100  | 2.71240000  |
| H | -6.39977800 | -0.85047400 | 0.96986400  |
| H | -8.73813600 | -0.07016100 | 0.51756800  |
| H | -8.08381300 | 1.73373300  | -1.12826700 |
| H | -7.12848900 | 3.83654800  | -0.31713200 |
| O | -0.67211600 | 0.63308300  | -2.10106500 |
| C | -0.30018600 | 3.32561200  | 3.34434800  |
| C | -1.20090100 | 3.13629000  | 2.33696300  |
| C | -1.30870200 | 4.06475300  | 1.25015500  |
| C | -0.45993900 | 5.22441900  | 1.27748400  |
| C | 0.46150100  | 5.39385800  | 2.35971600  |
| C | 0.54756600  | 4.47149600  | 3.36067800  |
| C | -2.22108900 | 3.89336500  | 0.18491200  |
| C | -0.54080500 | 6.16729400  | 0.25270200  |
| C | -1.40388900 | 5.99013000  | -0.82490500 |
| C | -2.24224800 | 4.82457200  | -0.87609200 |
| C | -3.05845400 | 4.64374700  | -2.04195100 |
| H | -3.65431500 | 3.74204500  | -2.12582700 |
| C | -3.07298000 | 5.56875300  | -3.04403000 |
| C | -2.28030800 | 6.75098300  | -2.96045500 |
| C | -1.46629700 | 6.94691000  | -1.88744100 |
| H | -0.22799100 | 2.59712300  | 4.14531800  |
| H | -1.83899800 | 2.26099800  | 2.34642500  |
| H | 1.09638100  | 6.27598300  | 2.35893900  |
| H | 1.25606600  | 4.60521100  | 4.17171300  |
| H | 0.09434100  | 7.04955500  | 0.28829700  |
| H | -3.69087300 | 5.40265300  | -3.92080300 |
| H | -2.31684800 | 7.48004600  | -3.76351400 |
| H | -0.83210200 | 7.82677300  | -1.82078500 |
| C | 0.62496600  | -5.29983700 | 0.37409000  |

|   |             |             |             |
|---|-------------|-------------|-------------|
| C | -0.47579400 | -4.51975600 | 0.16635800  |
| C | -1.11346800 | -4.45987200 | -1.11583600 |
| C | -0.52515300 | -5.21593300 | -2.18834100 |
| C | 0.62811300  | -6.02382500 | -1.92675100 |
| C | 1.18226000  | -6.07668900 | -0.68302300 |
| C | -2.26855300 | -3.68500700 | -1.35623600 |
| C | -1.08146700 | -5.14637700 | -3.46404600 |
| C | -2.21367800 | -4.37519400 | -3.71993300 |
| C | -2.83141800 | -3.64098000 | -2.65080100 |
| C | -4.02527300 | -2.90781500 | -2.95309800 |
| H | -4.52612600 | -2.36714000 | -2.15865000 |
| C | -4.54119200 | -2.88484100 | -4.21390300 |
| C | -3.90895600 | -3.59451700 | -5.27565600 |
| C | -2.78349700 | -4.31919900 | -5.03136700 |
| H | 1.09261200  | -5.31385800 | 1.35498800  |
| H | -0.86609300 | -3.90859300 | 0.97427100  |
| H | 1.05663200  | -6.58919200 | -2.74989200 |
| H | 2.06405000  | -6.68054500 | -0.49905300 |
| H | -0.62771700 | -5.71203200 | -4.27469900 |
| H | -5.44561400 | -2.31997700 | -4.41513900 |
| H | -4.33360200 | -3.55869700 | -6.27367100 |
| H | -2.29430000 | -4.87504400 | -5.82645400 |
| C | 6.85414200  | 3.07784800  | 2.41061300  |
| C | 6.50029000  | 1.85245600  | 2.93467200  |
| C | 5.32592400  | 1.20409600  | 2.51349800  |
| C | 4.48016800  | 1.80609500  | 1.55380800  |
| C | 4.87094400  | 3.04691600  | 1.01976600  |
| C | 6.03278700  | 3.66678100  | 1.44088600  |
| H | 5.64416000  | -0.53655800 | 3.76713400  |
| H | 7.76347000  | 3.57272000  | 2.73294500  |
| H | 7.12802700  | 1.36482700  | 3.67524000  |
| C | 4.98748400  | -0.09579900 | 3.02134400  |
| C | 3.24603900  | 1.11400400  | 1.15184600  |
| H | 4.27555800  | 3.50102200  | 0.23786300  |
| H | 6.31576200  | 4.61653900  | 0.99875700  |
| C | 2.99102400  | -0.21510700 | 1.64450100  |
| C | 3.90185300  | -0.78637400 | 2.60506100  |
| H | 3.67088700  | -1.75424900 | 3.03075300  |
| C | 2.35795600  | 1.79335800  | 0.34776200  |
| C | 1.74658800  | 2.94292700  | 0.17607200  |
| C | 1.48237800  | 3.74893600  | -1.04619800 |
| C | 0.51375300  | 3.42392900  | -1.99427300 |
| C | 2.23805200  | 4.91868600  | -1.20263300 |
| C | 0.34735900  | 4.23248900  | -3.11765500 |

|   |             |             |             |
|---|-------------|-------------|-------------|
| H | -0.12214500 | 2.55592500  | -1.85540900 |
| C | 2.06209700  | 5.72303600  | -2.32190800 |
| H | 2.95772600  | 5.20136600  | -0.43854400 |
| C | 1.12161900  | 5.37396500  | -3.28913500 |
| H | -0.41374700 | 3.97042800  | -3.84535200 |
| H | 2.65901600  | 6.62215300  | -2.43727400 |
| H | 0.97787300  | 6.00443200  | -4.16083500 |
| N | 1.94877900  | -0.90502700 | 1.23009300  |
| C | 1.69340000  | -2.31280600 | 1.50497000  |
| H | 1.14937300  | -2.66795400 | 0.62819000  |
| H | 2.63802400  | -2.86292700 | 1.54678300  |
| C | 0.85808100  | -2.55867500 | 2.74162000  |
| C | -0.39039200 | -1.93927200 | 2.87161500  |
| C | 1.28916900  | -3.44606200 | 3.72686400  |
| C | -1.18210900 | -2.20800200 | 3.98145000  |
| H | -0.73645500 | -1.26987800 | 2.08668500  |
| C | 0.48918500  | -3.71690800 | 4.83622500  |
| H | 2.25518300  | -3.93661200 | 3.62221300  |
| C | -0.74778300 | -3.09546300 | 4.96568900  |
| H | -2.14996100 | -1.72456200 | 4.07070300  |
| H | 0.83494600  | -4.41041400 | 5.59601000  |
| H | -1.37337400 | -3.30199600 | 5.82885200  |
| H | 1.54418300  | 3.43698000  | 1.13387600  |
| H | 1.22592600  | -0.49881700 | 0.61773000  |
| C | 2.50358200  | -2.78457500 | -1.74082500 |
| C | 3.84321000  | -2.96141000 | -1.35563000 |
| C | 4.68239800  | -1.87709000 | -1.21698700 |
| C | 4.19260300  | -0.56877500 | -1.40150600 |
| C | 2.81917700  | -0.39005700 | -1.69268400 |
| C | 2.00075800  | -1.51586700 | -1.91285800 |
| H | 1.86297800  | -3.65045500 | -1.88849300 |
| H | 5.72317100  | -2.04497100 | -0.97015300 |
| H | 0.96267000  | -1.35926800 | -2.17907100 |
| N | 2.23184200  | 0.86455500  | -1.65913200 |
| H | 2.78891800  | 1.61663700  | -2.05499300 |
| H | 1.23438100  | 0.86935800  | -1.92157000 |
| C | 4.32789200  | -4.34252400 | -1.04128200 |
| F | 3.92245100  | -5.23907800 | -1.95149100 |
| F | 5.66421900  | -4.41025000 | -0.97153800 |
| F | 3.85378800  | -4.76595800 | 0.14978800  |
| C | 5.08251700  | 0.59762900  | -1.34111000 |
| O | 4.78784800  | 1.72140200  | -1.69803600 |
| C | 6.52630100  | 0.38188100  | -0.82854600 |
| F | 6.54122700  | -0.29429500 | 0.32857900  |

|   |            |             |             |
|---|------------|-------------|-------------|
| F | 7.14220400 | 1.53798400  | -0.64699800 |
| F | 7.22525900 | -0.33678300 | -1.72169800 |

### TS2-II'

Value of imaginary frequency = -300.34 cm<sup>-1</sup>

|   |            |             |             |
|---|------------|-------------|-------------|
| P | 1.23869600 | 0.14756100  | 1.05008800  |
| O | 1.85850100 | 1.00007300  | -0.23617000 |
| O | 2.61266500 | -0.45467200 | 1.71120000  |
| O | 0.44630900 | -0.94907100 | 0.39552800  |
| C | 2.96605100 | 1.79858100  | -0.07659700 |
| C | 4.20472500 | 1.19179800  | 0.16885800  |
| C | 2.85719500 | 3.18628500  | -0.24338000 |
| C | 4.01715400 | 3.93872800  | -0.05048800 |
| C | 5.22554100 | 3.37910500  | 0.35781600  |
| H | 3.96023500 | 5.01518500  | -0.19481200 |
| C | 3.50110700 | -1.08769700 | 0.87163300  |
| C | 4.31181700 | -0.29272800 | 0.06014100  |
| C | 3.60901100 | -2.48507700 | 0.88797400  |
| C | 4.52800300 | -3.05198800 | 0.00834700  |
| C | 5.27691700 | -2.29773500 | -0.89607400 |
| H | 4.64139100 | -4.13375600 | 0.00695700  |
| C | 5.17709600 | -0.90033900 | -0.87677400 |
| C | 5.93809000 | -0.06528700 | -1.89394100 |
| C | 7.11096100 | -0.81170600 | -2.52427900 |
| H | 7.90501800 | -0.94489800 | -1.77703100 |
| C | 6.65877000 | -2.17702100 | -3.02929700 |
| H | 7.46386500 | -2.68687900 | -3.56693600 |
| C | 6.18945300 | -3.03515400 | -1.85833600 |
| H | 5.67136500 | -3.92815200 | -2.22430800 |
| H | 5.23770600 | 0.24081500  | -2.68514100 |
| C | 5.32266900 | 1.98778400  | 0.48680400  |
| C | 6.58793700 | 1.35652500  | 1.04110200  |
| C | 7.81604800 | 2.25172600  | 0.90051300  |
| H | 8.10555500 | 2.32165100  | -0.15714500 |
| C | 7.51118400 | 3.64814500  | 1.43430700  |
| H | 8.40586400 | 4.27798400  | 1.42507100  |
| C | 6.41068300 | 4.29515400  | 0.59784700  |
| H | 6.82869600 | 4.58528000  | -0.37589300 |
| H | 6.41100100 | 1.15886800  | 2.10809700  |
| H | 7.06689200 | -3.39369300 | -1.30311100 |
| H | 5.83460000 | -2.04159400 | -3.74127800 |
| H | 7.53388800 | -0.21208400 | -3.33600700 |
| H | 6.28482400 | 0.86998400  | -1.45263100 |
| H | 6.77036200 | 0.37838100  | 0.59162300  |



|   |             |             |             |
|---|-------------|-------------|-------------|
| H | 8.66083300  | 1.80449600  | 1.43305800  |
| H | 7.18442100  | 3.56830500  | 2.47879300  |
| H | 6.06397100  | 5.22151400  | 1.06769500  |
| O | 0.60709200  | 1.04667700  | 2.05167400  |
| C | 0.65845300  | 2.17517400  | -3.83610900 |
| C | 1.33873200  | 2.47550800  | -2.69356500 |
| C | 0.95334400  | 3.57858200  | -1.86077000 |
| C | -0.13698500 | 4.39976000  | -2.31394400 |
| C | -0.80663600 | 4.06825700  | -3.53671300 |
| C | -0.43660700 | 2.97953800  | -4.26737200 |
| C | 1.61050400  | 3.89658900  | -0.65004400 |
| C | -0.53346600 | 5.50353900  | -1.56135900 |
| C | 0.08201600  | 5.81216900  | -0.35004000 |
| C | 1.15654700  | 4.98801600  | 0.12894300  |
| C | 1.69861000  | 5.29502900  | 1.42096900  |
| H | 2.45924000  | 4.64441800  | 1.83624300  |
| C | 1.25074700  | 6.36398700  | 2.14136900  |
| C | 0.22136200  | 7.20810100  | 1.63493200  |
| C | -0.35271400 | 6.92781000  | 0.43249300  |
| H | 0.96002700  | 1.31811500  | -4.42960400 |
| H | 2.18084000  | 1.86132100  | -2.40153800 |
| H | -1.62477000 | 4.70637500  | -3.86134600 |
| H | -0.95946200 | 2.72941900  | -5.18491900 |
| H | -1.35032300 | 6.12736600  | -1.91782600 |
| H | 1.67357000  | 6.56708500  | 3.12028100  |
| H | -0.11661600 | 8.05630200  | 2.22153200  |
| H | -1.16240500 | 7.53984700  | 0.04458100  |
| C | 1.10862500  | -5.63611700 | -0.63625700 |
| C | 1.87632200  | -4.61711500 | -0.15269900 |
| C | 1.98912300  | -4.36912000 | 1.25558200  |
| C | 1.23173700  | -5.21498700 | 2.13687700  |
| C | 0.43080600  | -6.26587600 | 1.58799000  |
| C | 0.37499100  | -6.48099500 | 0.24502900  |
| C | 2.79433300  | -3.34018200 | 1.79532200  |
| C | 1.29052700  | -5.00428000 | 3.51262000  |
| C | 2.09075900  | -4.00385300 | 4.06000000  |
| C | 2.86899300  | -3.16292900 | 3.19410800  |
| C | 3.72692700  | -2.19275500 | 3.80832500  |
| H | 4.34813300  | -1.56626900 | 3.17943000  |
| C | 3.78032000  | -2.05167500 | 5.16232700  |
| C | 2.98113700  | -2.86769600 | 6.01449200  |
| C | 2.16647700  | -3.81548000 | 5.47654000  |
| H | 1.04487900  | -5.79027700 | -1.70983800 |
| H | 2.39365000  | -3.96557500 | -0.84831700 |

|   |             |             |             |
|---|-------------|-------------|-------------|
| H | -0.13260000 | -6.89076500 | 2.27548500  |
| H | -0.23306800 | -7.28389100 | -0.15900100 |
| H | 0.70867300  | -5.64232400 | 4.17403600  |
| H | 4.43906900  | -1.30888500 | 5.60032300  |
| H | 3.03315100  | -2.73377400 | 7.09022200  |
| H | 1.55953700  | -4.45532300 | 6.11124300  |
| C | -7.14595900 | 0.15513300  | -2.69574900 |
| C | -6.34696200 | -0.80163300 | -3.28549500 |
| C | -4.98043200 | -0.89201500 | -2.96423800 |
| C | -4.40397800 | 0.01929600  | -2.05206400 |
| C | -5.23633200 | 0.98581200  | -1.45879900 |
| C | -6.58282700 | 1.04308800  | -1.76734500 |
| H | -4.61357600 | -2.62093400 | -4.22165400 |
| H | -8.20268800 | 0.21062900  | -2.93201900 |
| H | -6.76572800 | -1.51231200 | -3.99259900 |
| C | -4.16251400 | -1.94564400 | -3.49895000 |
| C | -2.97792700 | -0.10332300 | -1.73271300 |
| H | -4.82618500 | 1.66044300  | -0.71290400 |
| H | -7.21132600 | 1.77223400  | -1.26715200 |
| C | -2.24884100 | -1.26499500 | -2.16792500 |
| C | -2.87953100 | -2.14968800 | -3.11575100 |
| H | -2.30162100 | -2.96146200 | -3.53842000 |
| C | -2.38532400 | 0.90890000  | -1.01748300 |
| C | -2.22647300 | 2.21160300  | -0.97331000 |
| C | -2.23569700 | 3.16763500  | 0.15723000  |
| C | -1.26018000 | 3.19801700  | 1.14967800  |
| C | -3.31435200 | 4.05970000  | 0.21403000  |
| C | -1.40221200 | 4.06313000  | 2.23366900  |
| H | -0.39216200 | 2.55015400  | 1.09559400  |
| C | -3.44471400 | 4.92909000  | 1.29068800  |
| H | -4.05810000 | 4.05615900  | -0.57901200 |
| C | -2.49426400 | 4.92192600  | 2.31141600  |
| H | -0.63939500 | 4.06324900  | 3.00484300  |
| H | -4.28909100 | 5.60957900  | 1.33460000  |
| H | -2.59568300 | 5.60011900  | 3.15270400  |
| N | -1.05476200 | -1.52067500 | -1.68121000 |
| C | -0.34312500 | -2.79138800 | -1.76910200 |
| H | 0.05079800  | -2.95169300 | -0.76300400 |
| H | -1.04831700 | -3.60018700 | -1.97423700 |
| C | 0.78729100  | -2.75723100 | -2.76904300 |
| C | 1.82436100  | -1.83416400 | -2.59215900 |
| C | 0.83229100  | -3.64330900 | -3.84313800 |
| C | 2.88041500  | -1.80007000 | -3.49497100 |
| H | 1.79935100  | -1.15641500 | -1.73952500 |

|   |             |             |             |
|---|-------------|-------------|-------------|
| C | 1.89800100  | -3.61309800 | -4.74179300 |
| H | 0.03149400  | -4.36795600 | -3.97559900 |
| C | 2.92101300  | -2.68756500 | -4.57074200 |
| H | 3.67979100  | -1.08049700 | -3.35184300 |
| H | 1.92412400  | -4.30893300 | -5.57425100 |
| H | 3.74923000  | -2.65643800 | -5.27221900 |
| H | -2.23378900 | 2.64653700  | -1.97878200 |
| H | -0.62002200 | -0.90313600 | -0.97819300 |
| C | -5.39790800 | 1.21149800  | 2.29613100  |
| C | -6.18991500 | 0.12517700  | 1.90011500  |
| C | -5.60639400 | -0.99249600 | 1.33974800  |
| C | -4.21906000 | -1.04249200 | 1.12422900  |
| C | -3.42693100 | 0.08320600  | 1.46496000  |
| C | -4.03672100 | 1.19230200  | 2.08547800  |
| H | -5.86110200 | 2.07453000  | 2.76415500  |
| H | -6.23518900 | -1.83262700 | 1.07207000  |
| H | -3.42142900 | 2.03972800  | 2.37283800  |
| N | -2.10999300 | 0.18149000  | 1.06172500  |
| H | -1.58939300 | -0.68979500 | 0.93115700  |
| H | -1.51932800 | 0.85303700  | 1.55806100  |
| C | -7.67739500 | 0.21817800  | 2.04808500  |
| F | -8.21774200 | 1.01341000  | 1.10620400  |
| F | -8.27260200 | -0.97637500 | 1.94281700  |
| F | -8.02344200 | 0.74514700  | 3.23242400  |
| C | -3.58802300 | -2.25481000 | 0.57422100  |
| O | -2.39633400 | -2.48406300 | 0.56286900  |
| C | -4.50342200 | -3.35952500 | -0.00737500 |
| F | -5.17464900 | -3.97426700 | 0.97731700  |
| F | -3.78117100 | -4.26539100 | -0.65225800 |
| F | -5.40637300 | -2.85911400 | -0.86082100 |

### IM3-II

|   |             |             |             |
|---|-------------|-------------|-------------|
| P | -1.43361300 | -0.13907500 | -0.55118600 |
| O | -2.09448000 | 0.88688100  | 0.49927700  |
| O | -2.65752400 | -0.51268400 | -1.52390300 |
| O | -0.82400400 | -1.26375900 | 0.18180000  |
| C | -3.17409300 | 1.70179400  | 0.18590800  |
| C | -4.40340300 | 1.11121200  | -0.12064100 |
| C | -2.99530500 | 3.08515500  | 0.25039800  |
| C | -4.11501800 | 3.86846300  | -0.02773000 |
| C | -5.33466000 | 3.32613200  | -0.43113600 |
| H | -4.01274600 | 4.94933000  | 0.03419500  |
| C | -3.66360400 | -1.16293500 | -0.79490900 |
| C | -4.52963700 | -0.37478900 | -0.04063700 |

|   |             |             |             |
|---|-------------|-------------|-------------|
| C | -3.68130400 | -2.55702500 | -0.77267200 |
| C | -4.64113200 | -3.15096600 | 0.04169000  |
| C | -5.49210300 | -2.40769900 | 0.86223400  |
| H | -4.68569300 | -4.23681600 | 0.07890500  |
| C | -5.42652700 | -1.00650000 | 0.84679500  |
| C | -6.20472400 | -0.18717200 | 1.86216400  |
| C | -7.36251500 | -0.94977000 | 2.50069700  |
| H | -8.17265700 | -1.07145000 | 1.76942700  |
| C | -6.89762500 | -2.32432800 | 2.96969200  |
| H | -7.69286500 | -2.84588400 | 3.51012900  |
| C | -6.45534500 | -3.15128000 | 1.76661400  |
| H | -5.99216400 | -4.08886100 | 2.08973200  |
| H | -5.49583500 | 0.11370100  | 2.64682800  |
| C | -5.47873900 | 1.93332900  | -0.51135200 |
| C | -6.73933000 | 1.32591100  | -1.10099500 |
| C | -7.94146400 | 2.26439900  | -1.04133000 |
| H | -8.27201300 | 2.37862100  | -0.00009900 |
| C | -7.56775200 | 3.63110300  | -1.60681800 |
| H | -8.43975200 | 4.28998500  | -1.65254200 |
| C | -6.47981100 | 4.26915700  | -0.74756500 |
| H | -6.92388900 | 4.60144500  | 0.20057100  |
| H | -6.52434300 | 1.08868700  | -2.15272700 |
| H | -7.34110700 | -3.43163100 | 1.18055100  |
| H | -6.05671100 | -2.20592200 | 3.66505100  |
| H | -7.76868600 | -0.36610100 | 3.33196700  |
| H | -6.56271100 | 0.74684800  | 1.42531800  |
| H | -6.97405500 | 0.36922300  | -0.63021000 |
| H | -8.77691400 | 1.82630800  | -1.59519500 |
| H | -7.20402900 | 3.50708900  | -2.63453200 |
| H | -6.08443200 | 5.16886800  | -1.22998300 |
| O | -0.45552300 | 0.64604500  | -1.48821800 |
| C | -0.86630300 | 2.32598300  | 3.93409400  |
| C | -1.56020200 | 2.59401900  | 2.79126800  |
| C | -1.02887600 | 3.46641100  | 1.78657900  |
| C | 0.22298400  | 4.11254000  | 2.06495600  |
| C | 0.92442600  | 3.79804500  | 3.27116300  |
| C | 0.40661900  | 2.91975300  | 4.17267000  |
| C | -1.68235300 | 3.71750700  | 0.56016800  |
| C | 0.73995300  | 5.03149100  | 1.15296800  |
| C | 0.10018200  | 5.29909100  | -0.05449500 |
| C | -1.11475900 | 4.60579600  | -0.38085700 |
| C | -1.68065100 | 4.84028500  | -1.67931100 |
| H | -2.56183400 | 4.28505200  | -1.97807400 |
| C | -1.11772500 | 5.72919400  | -2.54558800 |

|   |             |             |             |
|---|-------------|-------------|-------------|
| C | 0.06111400  | 6.44972200  | -2.19450000 |
| C | 0.65401500  | 6.22930300  | -0.99046400 |
| H | -1.27914800 | 1.64195800  | 4.66835700  |
| H | -2.52992700 | 2.13473300  | 2.63115200  |
| H | 1.88735600  | 4.27154800  | 3.44316200  |
| H | 0.95385900  | 2.67077000  | 5.07564600  |
| H | 1.67510100  | 5.53948500  | 1.38163900  |
| H | -1.56205500 | 5.88046000  | -3.52447700 |
| H | 0.49707000  | 7.14676200  | -2.90252200 |
| H | 1.57318200  | 6.74145400  | -0.72028700 |
| C | -0.74220200 | -4.91592000 | 1.26661500  |
| C | -1.64334900 | -4.12785800 | 0.61282200  |
| C | -1.76505800 | -4.16925600 | -0.81644900 |
| C | -0.86868500 | -5.02709500 | -1.54153300 |
| C | 0.05325900  | -5.84917700 | -0.81569100 |
| C | 0.11127600  | -5.80324900 | 0.54515200  |
| C | -2.69267000 | -3.37837400 | -1.52657100 |
| C | -0.90055900 | -5.03604000 | -2.93516200 |
| C | -1.78736000 | -4.22971700 | -3.64760000 |
| C | -2.70880300 | -3.38926900 | -2.93575200 |
| C | -3.62379400 | -2.59768500 | -3.70279000 |
| H | -4.33808300 | -1.96894700 | -3.18256600 |
| C | -3.60888600 | -2.62633100 | -5.06519400 |
| C | -2.68424800 | -3.45271900 | -5.76792200 |
| C | -1.80591300 | -4.23107600 | -5.07811900 |
| H | -0.65943400 | -4.84936100 | 2.34761100  |
| H | -2.25124300 | -3.42579700 | 1.17260400  |
| H | 0.71754000  | -6.49943500 | -1.37925000 |
| H | 0.81837400  | -6.42618100 | 1.08403600  |
| H | -0.21557500 | -5.68293000 | -3.47863100 |
| H | -4.30916300 | -2.01543300 | -5.62547400 |
| H | -2.68887300 | -3.45973700 | -6.85294200 |
| H | -1.09938900 | -4.87055100 | -5.59981700 |
| C | 7.13074000  | 2.18404300  | 2.52429700  |
| C | 6.38721800  | 1.36782400  | 3.33550100  |
| C | 5.10289100  | 0.91700100  | 2.94645300  |
| C | 4.53236800  | 1.32404600  | 1.70360200  |
| C | 5.34651400  | 2.15959900  | 0.88113100  |
| C | 6.59741100  | 2.56749200  | 1.27738500  |
| H | 4.78149100  | -0.22290100 | 4.75584700  |
| H | 8.11639500  | 2.52042800  | 2.82717200  |
| H | 6.77419600  | 1.04025700  | 4.29696900  |
| C | 4.36314200  | 0.05092800  | 3.79105000  |
| C | 3.22651700  | 0.83827300  | 1.31971900  |

|   |             |             |             |
|---|-------------|-------------|-------------|
| H | 4.99105200  | 2.46805600  | -0.09339900 |
| H | 7.18587400  | 3.18516100  | 0.60599400  |
| C | 2.56828100  | -0.07161100 | 2.15647900  |
| C | 3.14975000  | -0.42969300 | 3.41289700  |
| H | 2.57703100  | -1.05932600 | 4.08475300  |
| C | 2.63057700  | 1.34203200  | 0.04616800  |
| C | 2.58798600  | 2.66445200  | -0.19432900 |
| C | 2.44288500  | 3.36066100  | -1.48835800 |
| C | 1.45473300  | 3.08692000  | -2.44058700 |
| C | 3.39857600  | 4.34675700  | -1.78488200 |
| C | 1.45830000  | 3.74147600  | -3.67091500 |
| H | 0.64693100  | 2.40263400  | -2.20909300 |
| C | 3.40195100  | 4.99402300  | -3.01230100 |
| H | 4.15581700  | 4.58702800  | -1.04221800 |
| C | 2.43545900  | 4.68389000  | -3.96771800 |
| H | 0.67721900  | 3.51919400  | -4.39125500 |
| H | 4.16102500  | 5.73997500  | -3.22625000 |
| H | 2.43620100  | 5.18760100  | -4.92913000 |
| N | 1.35880000  | -0.63322800 | 1.84592000  |
| C | 0.96985900  | -1.94751600 | 2.33064800  |
| H | 0.52260700  | -2.48559000 | 1.49047900  |
| H | 1.86291200  | -2.50951700 | 2.62786900  |
| C | -0.04175900 | -1.94585000 | 3.45707900  |
| C | -1.15596600 | -1.10395200 | 3.40205000  |
| C | 0.08086800  | -2.84018900 | 4.52035900  |
| C | -2.12943800 | -1.16818100 | 4.39369800  |
| H | -1.24865300 | -0.40343200 | 2.57723500  |
| C | -0.89396000 | -2.90350400 | 5.51482500  |
| H | 0.94906300  | -3.49461000 | 4.57001000  |
| C | -2.00328700 | -2.06733300 | 5.45200500  |
| H | -2.99449400 | -0.51245200 | 4.34068000  |
| H | -0.78265600 | -3.60174300 | 6.33845900  |
| H | -2.76515800 | -2.11287200 | 6.22375200  |
| H | 2.89500800  | 3.29106100  | 0.63774600  |
| H | 0.90997100  | -0.36531300 | 0.98499400  |
| C | 2.66174500  | -3.27177100 | -0.71668300 |
| C | 4.03848800  | -3.40926700 | -0.84537700 |
| C | 4.83860800  | -2.30017100 | -1.08394800 |
| C | 4.26091600  | -1.03060100 | -1.18055700 |
| C | 2.87020000  | -0.88330500 | -0.99937200 |
| C | 2.08385300  | -2.00991500 | -0.79416000 |
| H | 2.03433900  | -4.14258300 | -0.55201600 |
| H | 5.90550000  | -2.43375800 | -1.21818200 |
| H | 1.01008000  | -1.89905100 | -0.67805300 |

|   |            |             |             |
|---|------------|-------------|-------------|
| N | 2.21658800 | 0.40802400  | -0.99731600 |
| H | 2.43597200 | 0.87882300  | -1.88257100 |
| H | 0.52143300 | 0.46735700  | -1.25975400 |
| C | 4.65411400 | -4.77022800 | -0.68894600 |
| F | 3.87094100 | -5.72459300 | -1.21475000 |
| F | 5.85091800 | -4.84964400 | -1.28589200 |
| F | 4.83392500 | -5.08433900 | 0.60217300  |
| C | 5.09389400 | 0.13167100  | -1.58059300 |
| O | 4.66728300 | 1.11084900  | -2.14558900 |
| C | 6.61624600 | 0.05676800  | -1.31666300 |
| F | 6.88138300 | -0.39185200 | -0.09016100 |
| F | 7.17941200 | 1.24444200  | -1.47949600 |
| F | 7.18142400 | -0.79332500 | -2.19430600 |

**IM3-II'**

|   |            |             |             |
|---|------------|-------------|-------------|
| P | 1.15027600 | -0.18016700 | 0.48843900  |
| O | 2.34929300 | 0.53042400  | -0.32152600 |
| O | 1.93736600 | -1.08189500 | 1.56376900  |
| O | 0.27955800 | -0.88689300 | -0.47030900 |
| C | 3.59757900 | 0.79982600  | 0.21164300  |
| C | 4.41106400 | -0.26390200 | 0.61844900  |
| C | 4.01938200 | 2.13297800  | 0.25901700  |
| C | 5.31001500 | 2.35754100  | 0.73872300  |
| C | 6.11143600 | 1.34059000  | 1.25553200  |
| H | 5.68234900 | 3.37913400  | 0.75308700  |
| C | 2.70966800 | -2.05144900 | 0.91922200  |
| C | 3.94058700 | -1.66495700 | 0.39581400  |
| C | 2.17299900 | -3.33066500 | 0.76662200  |
| C | 2.93368800 | -4.23554100 | 0.03446600  |
| C | 4.14498100 | -3.88128400 | -0.56725600 |
| H | 2.54740500 | -5.24216300 | -0.10751400 |
| C | 4.66037100 | -2.58729800 | -0.39768900 |
| C | 5.91103600 | -2.14994200 | -1.14318700 |
| C | 6.73884600 | -3.31397800 | -1.68190100 |
| H | 7.25245800 | -3.81593900 | -0.85119700 |
| C | 5.84295300 | -4.31872100 | -2.39748200 |
| H | 6.43477500 | -5.10818500 | -2.86966400 |
| C | 4.86450900 | -4.92605600 | -1.39799400 |
| H | 4.12294800 | -5.54735600 | -1.91009600 |
| H | 5.59672700 | -1.51153600 | -1.98020400 |
| C | 5.64411500 | 0.01855400  | 1.23921600  |
| C | 6.40847800 | -1.06935600 | 1.97292800  |
| C | 7.88820300 | -0.74303000 | 2.15544800  |
| H | 8.40095600 | -0.78247100 | 1.18473000  |

|   |             |             |             |
|---|-------------|-------------|-------------|
| C | 8.04531700  | 0.65083600  | 2.75590200  |
| H | 9.09512400  | 0.87058600  | 2.97102200  |
| C | 7.48173600  | 1.69829000  | 1.79936200  |
| H | 8.16936200  | 1.81131600  | 0.95019800  |
| H | 5.94405900  | -1.17413600 | 2.96396500  |
| H | 5.41312300  | -5.59627200 | -0.72236500 |
| H | 5.28779200  | -3.80888100 | -3.19543900 |
| H | 7.51494800  | -2.92955600 | -2.35014900 |
| H | 6.53449100  | -1.50655800 | -0.52048000 |
| H | 6.28112200  | -2.03985100 | 1.48982800  |
| H | 8.35525600  | -1.49866800 | 2.79388600  |
| H | 7.50603400  | 0.69238000  | 3.71050900  |
| H | 7.43494400  | 2.67841000  | 2.28494100  |
| O | 0.44320000  | 0.88581600  | 1.39180100  |
| C | 2.11129900  | 2.39137100  | -3.61313700 |
| C | 2.77106000  | 2.34659500  | -2.42181100 |
| C | 2.54998300  | 3.33715200  | -1.40960400 |
| C | 1.68636200  | 4.43813100  | -1.73960900 |
| C | 1.00432300  | 4.44501700  | -2.99853300 |
| C | 1.19166800  | 3.44294200  | -3.89958700 |
| C | 3.14119900  | 3.27392100  | -0.12777900 |
| C | 1.52398700  | 5.48126800  | -0.83106900 |
| C | 2.13595300  | 5.45738300  | 0.42058100  |
| C | 2.91847700  | 4.31550900  | 0.80651600  |
| C | 3.40867700  | 4.28353000  | 2.15599000  |
| H | 3.93936500  | 3.40556100  | 2.50343100  |
| C | 3.19925900  | 5.32428400  | 3.01402100  |
| C | 2.47139400  | 6.47739000  | 2.60266900  |
| C | 1.94608800  | 6.52981400  | 1.34766300  |
| H | 2.28758600  | 1.61748500  | -4.35251100 |
| H | 3.46936700  | 1.53925800  | -2.23361400 |
| H | 0.32921300  | 5.26968300  | -3.20963400 |
| H | 0.65690600  | 3.44098800  | -4.84369100 |
| H | 0.88930500  | 6.32401600  | -1.09535700 |
| H | 3.57964700  | 5.26726100  | 4.02896800  |
| H | 2.31854500  | 7.29539200  | 3.29891600  |
| H | 1.35405600  | 7.38233600  | 1.02692200  |
| C | -1.18687600 | -4.29597300 | -1.73596800 |
| C | -0.13128100 | -3.95481500 | -0.94429200 |
| C | -0.23008800 | -4.00571000 | 0.48557000  |
| C | -1.49638100 | -4.37794300 | 1.05414300  |
| C | -2.57890600 | -4.73025700 | 0.18581800  |
| C | -2.42995800 | -4.70111100 | -1.16686000 |
| C | 0.84342800  | -3.68309200 | 1.34037600  |



|   |             |             |             |
|---|-------------|-------------|-------------|
| C | -1.65540900 | -4.38326300 | 2.43810600  |
| C | -0.60744900 | -4.04427500 | 3.29300300  |
| C | 0.67090700  | -3.69602300 | 2.74073900  |
| C | 1.72927200  | -3.38360300 | 3.65427800  |
| H | 2.70890700  | -3.13624700 | 3.26028100  |
| C | 1.52585400  | -3.39775700 | 5.00195300  |
| C | 0.25055400  | -3.72899000 | 5.54441100  |
| C | -0.77981400 | -4.04545200 | 4.71292000  |
| H | -1.08980200 | -4.23721600 | -2.81550800 |
| H | 0.79489700  | -3.61402500 | -1.39398300 |
| H | -3.52579000 | -5.01454200 | 0.63578500  |
| H | -3.26068100 | -4.95752900 | -1.81617400 |
| H | -2.61936300 | -4.65727100 | 2.86127400  |
| H | 2.34346500  | -3.15550800 | 5.67313900  |
| H | 0.10910100  | -3.73136600 | 6.62023800  |
| H | -1.75674700 | -4.30616300 | 5.11050000  |
| C | -7.43547200 | 1.54499600  | -2.12340300 |
| C | -6.76269500 | 0.94430200  | -3.15460300 |
| C | -5.34821500 | 0.86429600  | -3.15428300 |
| C | -4.59894000 | 1.44159800  | -2.08909500 |
| C | -5.33213900 | 2.05545900  | -1.03213200 |
| C | -6.70341800 | 2.09480000  | -1.04716100 |
| H | -5.21375200 | -0.23204500 | -5.01328700 |
| H | -8.51920900 | 1.59150600  | -2.12385900 |
| H | -7.30389300 | 0.50109100  | -3.98639300 |
| C | -4.64851700 | 0.18537700  | -4.18443200 |
| C | -3.16868000 | 1.31634800  | -2.07969900 |
| H | -4.79642100 | 2.47681300  | -0.18805100 |
| H | -7.23220200 | 2.55313400  | -0.21718600 |
| C | -2.52229500 | 0.58380700  | -3.07195500 |
| C | -3.29339000 | 0.04823500  | -4.14696300 |
| H | -2.78109800 | -0.45518300 | -4.95881500 |
| C | -2.40647100 | 1.87618800  | -0.92448100 |
| C | -2.33979000 | 3.19643600  | -0.71772000 |
| C | -1.87380600 | 3.88141000  | 0.50480600  |
| C | -0.60142300 | 3.68176700  | 1.04244600  |
| C | -2.78001400 | 4.70348700  | 1.18765200  |
| C | -0.26517300 | 4.23218200  | 2.27623000  |
| H | 0.13345600  | 3.10290000  | 0.49145400  |
| C | -2.43931300 | 5.26420200  | 2.41328600  |
| H | -3.76536500 | 4.87755300  | 0.76270100  |
| C | -1.18490300 | 5.01567300  | 2.96770900  |
| H | 0.72499600  | 4.05596500  | 2.68546500  |
| H | -3.15431000 | 5.88974000  | 2.93829400  |

|   |             |             |             |
|---|-------------|-------------|-------------|
| H | -0.91657900 | 5.44706500  | 3.92683800  |
| N | -1.15144500 | 0.37596500  | -3.07329800 |
| C | -0.59816800 | -0.95100100 | -3.36760300 |
| H | -0.50462800 | -1.53106300 | -2.44595000 |
| H | -1.30492100 | -1.47824000 | -4.01140900 |
| C | 0.74195500  | -0.85900800 | -4.05542000 |
| C | 1.91316200  | -1.13496600 | -3.35025800 |
| C | 0.82826100  | -0.49895200 | -5.40282300 |
| C | 3.15014500  | -1.06908700 | -3.99033000 |
| H | 1.84478700  | -1.38812300 | -2.29473500 |
| C | 2.06017900  | -0.43859100 | -6.04470500 |
| H | -0.08328800 | -0.26632900 | -5.94861900 |
| C | 3.22757500  | -0.72681600 | -5.33688900 |
| H | 4.05471200  | -1.29012100 | -3.43255700 |
| H | 2.11379700  | -0.16785200 | -7.09462200 |
| H | 4.19121900  | -0.68102600 | -5.83434300 |
| H | -2.81292400 | 3.81501800  | -1.47852500 |
| H | -0.63908600 | 0.84544300  | -2.33422800 |
| C | -4.23379800 | 0.97217300  | 2.94836800  |
| C | -5.08113400 | -0.10016000 | 2.67281400  |
| C | -4.87938400 | -0.88102900 | 1.54823100  |
| C | -3.82299600 | -0.59996400 | 0.67303200  |
| C | -2.97506400 | 0.49377600  | 0.94148800  |
| C | -3.18838100 | 1.26445000  | 2.08795300  |
| H | -4.38835800 | 1.56956500  | 3.84130500  |
| H | -5.54415700 | -1.71471200 | 1.35681100  |
| H | -2.51434800 | 2.08897300  | 2.29597500  |
| N | -1.91831400 | 0.89869100  | 0.05594300  |
| H | -1.58501900 | 0.07075700  | -0.45066900 |
| H | -0.47296200 | 1.07433800  | 0.99840000  |
| C | -6.22694100 | -0.37372300 | 3.60270900  |
| F | -7.16335800 | 0.58388500  | 3.52119800  |
| F | -6.82499000 | -1.54189900 | 3.33627700  |
| F | -5.82187100 | -0.40614700 | 4.88126100  |
| C | -3.62584800 | -1.44661800 | -0.53335200 |
| O | -2.58107500 | -1.58859600 | -1.11933600 |
| C | -4.86816900 | -2.17917600 | -1.09700800 |
| F | -5.20356400 | -3.22529100 | -0.31759300 |
| F | -4.62282400 | -2.63832700 | -2.31542300 |
| F | -5.92434600 | -1.36450600 | -1.14537100 |

**IM4b**

|   |             |            |            |
|---|-------------|------------|------------|
| C | -6.14452400 | 0.92709400 | 2.56528700 |
| C | -6.35048500 | 0.11338100 | 1.48092200 |

|   |             |             |             |
|---|-------------|-------------|-------------|
| C | -5.32041400 | -0.11351400 | 0.53561000  |
| C | -4.05626300 | 0.51932300  | 0.70492500  |
| C | -3.87175700 | 1.35254400  | 1.84218600  |
| C | -4.88790300 | 1.54786900  | 2.74377000  |
| H | -6.48179100 | -1.44039700 | -0.71763200 |
| H | -6.93872000 | 1.09500100  | 3.28488500  |
| H | -7.30966000 | -0.37458800 | 1.32948500  |
| C | -5.51253800 | -0.96752000 | -0.58406900 |
| C | -3.01643100 | 0.26331900  | -0.24356700 |
| H | -2.91465200 | 1.84296400  | 1.98549200  |
| H | -4.72521400 | 2.18978200  | 3.60384500  |
| C | -3.24179500 | -0.56265600 | -1.33676500 |
| C | -4.51820000 | -1.18018500 | -1.49369800 |
| H | -4.69934300 | -1.79727700 | -2.36763100 |
| C | -1.63631100 | 0.78766200  | 0.00546500  |
| C | -1.31749600 | 2.07144500  | -0.25495200 |
| H | -2.08802300 | 2.62760200  | -0.78192600 |
| C | -0.11883900 | 2.83957800  | 0.10642400  |
| C | 0.32223500  | 3.86108900  | -0.74913300 |
| C | 0.55691600  | 2.65467600  | 1.32161700  |
| C | 1.39981000  | 4.66746800  | -0.40465100 |
| H | -0.19091700 | 4.01184600  | -1.69473400 |
| C | 1.63663900  | 3.46075900  | 1.66478100  |
| H | 0.21299300  | 1.89021800  | 2.01266700  |
| C | 2.06025200  | 4.47069500  | 0.80551600  |
| H | 1.72731500  | 5.44762900  | -1.08418800 |
| H | 2.14248800  | 3.30415000  | 2.61208200  |
| H | 2.90253800  | 5.09884800  | 1.07613200  |
| N | -2.26954200 | -0.73322600 | -2.31527600 |
| C | -1.88254400 | -2.07704000 | -2.73727700 |
| H | -1.33216000 | -1.98282300 | -3.67785500 |
| H | -2.78256800 | -2.66020600 | -2.95007400 |
| H | -1.44748800 | -0.16067000 | -2.14966500 |
| N | -0.83272300 | -0.21274100 | 0.56695400  |
| C | 0.52127100  | -0.42749900 | 0.73750600  |
| C | 0.85706800  | -1.21733600 | 1.86083300  |
| C | 1.57547300  | 0.04117500  | -0.08353800 |
| C | 2.15730900  | -1.55125500 | 2.15462000  |
| H | 0.05240800  | -1.56019500 | 2.50419100  |
| C | 2.90125700  | -0.29316500 | 0.24848100  |
| C | 3.19364100  | -1.08589000 | 1.33733300  |
| H | 2.38323400  | -2.16079100 | 3.02361500  |
| H | 3.71636200  | 0.04832700  | -0.37803200 |
| C | 1.34890300  | 0.71094900  | -1.37463500 |

|   |             |             |             |
|---|-------------|-------------|-------------|
| O | 0.36375300  | 0.58878200  | -2.06868700 |
| C | 2.49730900  | 1.56754600  | -1.96089900 |
| F | 2.03070500  | 2.40829700  | -2.87370900 |
| F | 3.39578100  | 0.76354300  | -2.56060200 |
| F | 3.14420000  | 2.26517100  | -1.02535200 |
| H | -1.39009100 | -0.95444000 | 0.97284300  |
| C | -1.02873500 | -2.79109900 | -1.70973000 |
| C | -1.62203000 | -3.41336400 | -0.60648800 |
| C | 0.36385000  | -2.78353800 | -1.81056700 |
| C | -0.83734700 | -4.02973300 | 0.36485800  |
| H | -2.70620800 | -3.42250000 | -0.51750900 |
| C | 1.15219800  | -3.40696500 | -0.84548700 |
| H | 0.83246600  | -2.28744800 | -2.65729600 |
| C | 0.55125300  | -4.03531400 | 0.24087700  |
| H | -1.31002500 | -4.52135100 | 1.20981300  |
| H | 2.23478600  | -3.39391400 | -0.93292600 |
| H | 1.16368900  | -4.52056400 | 0.99444200  |
| C | 4.59802100  | -1.53247100 | 1.59826100  |
| F | 4.82024400  | -2.76401200 | 1.10481200  |
| F | 5.50018400  | -0.71730500 | 1.03645100  |
| F | 4.86173700  | -1.59301200 | 2.91226900  |

**IM5b**

|   |            |             |             |
|---|------------|-------------|-------------|
| P | 1.04143700 | 0.64010400  | -0.98558300 |
| O | 2.10227600 | 1.85239800  | -0.83699000 |
| O | 1.89925000 | -0.64799700 | -0.49508600 |
| O | 0.47591400 | 0.61104300  | -2.34328200 |
| C | 2.92615800 | 1.85610700  | 0.27846000  |
| C | 3.99768000 | 0.96350400  | 0.30895500  |
| C | 2.63987200 | 2.73286200  | 1.32446600  |
| C | 3.48899200 | 2.69126900  | 2.42702100  |
| C | 4.54223200 | 1.78085500  | 2.52606600  |
| H | 3.29253900 | 3.36678800  | 3.25637500  |
| C | 3.11913300 | -0.85126600 | -1.12289200 |
| C | 4.17606900 | 0.00907100  | -0.82802400 |
| C | 3.25162000 | -1.94247300 | -1.98438500 |
| C | 4.46409400 | -2.07629700 | -2.64983200 |
| C | 5.50039100 | -1.14823400 | -2.49820000 |
| H | 4.60201900 | -2.92321400 | -3.31804300 |
| C | 5.36337300 | -0.09670300 | -1.58074600 |
| C | 6.43872800 | 0.96692100  | -1.45577000 |
| C | 7.79871700 | 0.50586100  | -1.97216200 |
| H | 8.21970700 | -0.24609500 | -1.29114600 |
| C | 7.64901800 | -0.09950900 | -3.36472400 |

|   |             |             |             |
|---|-------------|-------------|-------------|
| H | 8.62406400  | -0.35191500 | -3.79157900 |
| C | 6.77324700  | -1.34777900 | -3.29916100 |
| H | 6.51531700  | -1.69019700 | -4.30657600 |
| H | 6.10939000  | 1.83635200  | -2.04187500 |
| C | 4.78748300  | 0.88370000  | 1.47460200  |
| C | 5.79056100  | -0.24388900 | 1.64936200  |
| C | 6.80759100  | 0.01332600  | 2.75821200  |
| H | 7.51105300  | 0.79428100  | 2.44006600  |
| C | 6.10032600  | 0.46076400  | 4.03297200  |
| H | 6.80897900  | 0.56648500  | 4.85967400  |
| C | 5.38799900  | 1.78679500  | 3.78475800  |
| H | 6.13945200  | 2.58325900  | 3.69613800  |
| H | 5.21643400  | -1.15038600 | 1.89103800  |
| H | 7.34742100  | -2.16288800 | -2.83796300 |
| H | 7.18866600  | 0.64147900  | -4.03014900 |
| H | 8.49387900  | 1.35042000  | -1.98444100 |
| H | 6.51440000  | 1.32245200  | -0.42538400 |
| H | 6.30385500  | -0.46665100 | 0.71232500  |
| H | 7.39488200  | -0.89320600 | 2.93197900  |
| H | 5.36971500  | -0.30259700 | 4.32849100  |
| H | 4.75878300  | 2.05424900  | 4.63962500  |
| O | 0.01367500  | 0.74623200  | 0.18779400  |
| H | -0.90273800 | 0.95234000  | -0.23519000 |
| C | 2.42537300  | 6.09167000  | -1.34103400 |
| C | 2.49114100  | 5.02593900  | -0.49424300 |
| C | 1.43131300  | 4.74937000  | 0.42937100  |
| C | 0.30629800  | 5.64234600  | 0.45183400  |
| C | 0.27745500  | 6.75062500  | -0.45357900 |
| C | 1.30028800  | 6.96791300  | -1.32618700 |
| C | 1.45590000  | 3.63977100  | 1.29692300  |
| C | -0.74862200 | 5.40240500  | 1.33228400  |
| C | -0.75342500 | 4.28612900  | 2.16878000  |
| C | 0.36420200  | 3.38089300  | 2.15173900  |
| C | 0.27978000  | 2.19529600  | 2.95342000  |
| H | 1.09713300  | 1.48351700  | 2.92410000  |
| C | -0.83038000 | 1.92883600  | 3.69776300  |
| C | -1.93850400 | 2.82722400  | 3.70977600  |
| C | -1.89408500 | 3.97339700  | 2.97525200  |
| H | 3.23589700  | 6.27840900  | -2.03798200 |
| H | 3.35174800  | 4.36607200  | -0.51532400 |
| H | -0.58938000 | 7.40558400  | -0.43140900 |
| H | 1.26728000  | 7.80840500  | -2.01185900 |
| H | -1.60954300 | 6.06810800  | 1.32607400  |
| H | -0.88269200 | 1.01325900  | 4.27723900  |

|   |             |             |             |
|---|-------------|-------------|-------------|
| H | -2.81803500 | 2.58091300  | 4.29521200  |
| H | -2.73524400 | 4.66111800  | 2.95867300  |
| C | -0.11269400 | -1.62346300 | -4.66046300 |
| C | 0.98461200  | -1.76203500 | -3.86453700 |
| C | 1.08238400  | -2.84124800 | -2.92996100 |
| C | 0.00626200  | -3.79603900 | -2.87616200 |
| C | -1.12549800 | -3.61321200 | -3.73272300 |
| C | -1.18590700 | -2.55856500 | -4.59438600 |
| C | 2.16824100  | -2.96958600 | -2.04354200 |
| C | 0.06945600  | -4.85039000 | -1.96386400 |
| C | 1.14521100  | -4.99225500 | -1.08688300 |
| C | 2.21599800  | -4.03345400 | -1.11907800 |
| C | 3.27893700  | -4.17997500 | -0.16630300 |
| H | 4.09378400  | -3.46379600 | -0.17782400 |
| C | 3.27099500  | -5.19326900 | 0.74736200  |
| C | 2.20236600  | -6.13703700 | 0.78086700  |
| C | 1.17787800  | -6.03894000 | -0.11166100 |
| H | -0.18660500 | -0.77561600 | -5.33301600 |
| H | 1.77865700  | -1.02553500 | -3.89626000 |
| H | -1.94233600 | -4.32734400 | -3.67178000 |
| H | -2.05771400 | -2.41798600 | -5.22652100 |
| H | -0.75062300 | -5.56355000 | -1.91857400 |
| H | 4.08138300  | -5.28112700 | 1.46363600  |
| H | 2.20916300  | -6.92759500 | 1.52369900  |
| H | 0.35532900  | -6.74836200 | -0.09312900 |
| C | -4.66026700 | -1.65281800 | -5.93271400 |
| C | -4.03803100 | -0.43307500 | -5.87660700 |
| C | -3.57750200 | 0.09466900  | -4.64208300 |
| C | -3.76698300 | -0.64856200 | -3.44212000 |
| C | -4.40180700 | -1.91992200 | -3.53745200 |
| C | -4.83712900 | -2.40244800 | -4.74529900 |
| H | -2.77463100 | 1.91223800  | -5.49003300 |
| H | -5.01164900 | -2.04768400 | -6.88020000 |
| H | -3.88618500 | 0.15355000  | -6.77871000 |
| C | -2.91690400 | 1.34594700  | -4.57388900 |
| C | -3.28611800 | -0.10910500 | -2.20863700 |
| H | -4.53598200 | -2.51089600 | -2.63867100 |
| H | -5.31934900 | -3.37382900 | -4.79215400 |
| C | -2.65055900 | 1.12431400  | -2.18326600 |
| C | -2.46745900 | 1.85161900  | -3.38635400 |
| H | -1.98302800 | 2.81910100  | -3.36577900 |
| C | -3.37294600 | -0.90894500 | -0.95126300 |
| C | -4.56880300 | -1.19479200 | -0.39632000 |
| N | -2.18132300 | 1.62438000  | -0.94469600 |

|   |             |             |             |
|---|-------------|-------------|-------------|
| C | -1.67758800 | 2.99741600  | -0.85478000 |
| H | -0.90830400 | 3.13475000  | -1.62139200 |
| H | -1.15899300 | 3.05924500  | 0.10606300  |
| H | -2.82013800 | 1.39158100  | -0.18306900 |
| N | -2.10041500 | -1.30789300 | -0.52450000 |
| C | -1.54058500 | -1.67539200 | 0.68314400  |
| C | -0.35509800 | -2.43350400 | 0.56558100  |
| C | -2.00958400 | -1.36803000 | 1.98343800  |
| C | 0.31230600  | -2.91637100 | 1.66159800  |
| H | 0.03011800  | -2.62784800 | -0.42924600 |
| C | -1.33260800 | -1.91039900 | 3.09694300  |
| C | -0.19546900 | -2.66947200 | 2.94586700  |
| H | 1.22272500  | -3.49497500 | 1.52936900  |
| H | -1.69176900 | -1.70519200 | 4.09810200  |
| C | -3.06015700 | -0.37787800 | 2.24761000  |
| O | -3.36160300 | 0.55250000  | 1.52824500  |
| C | -3.82690500 | -0.47310800 | 3.59181100  |
| F | -4.97267400 | 0.19198100  | 3.51751700  |
| F | -3.10408600 | 0.07715900  | 4.59079400  |
| F | -4.08330400 | -1.73350100 | 3.94283800  |
| H | -1.44364800 | -1.36743200 | -1.29925400 |
| C | -2.71903900 | 4.08951900  | -0.91303400 |
| C | -2.54114900 | 5.20372200  | -1.73175200 |
| C | -3.83135800 | 4.03720600  | -0.06794500 |
| C | -3.45788400 | 6.25250700  | -1.71088900 |
| H | -1.66521000 | 5.25953200  | -2.37425100 |
| C | -4.74930400 | 5.08181200  | -0.04805700 |
| H | -3.96933200 | 3.18271700  | 0.59242400  |
| C | -4.56390300 | 6.19311200  | -0.86879200 |
| H | -3.30722700 | 7.11439400  | -2.35351500 |
| H | -5.60864000 | 5.03213500  | 0.61323600  |
| H | -5.27985800 | 7.00843600  | -0.85089900 |
| C | 0.54022200  | -3.22063100 | 4.12536300  |
| F | 1.78584600  | -2.72378300 | 4.21038000  |
| F | -0.07714500 | -2.94731400 | 5.28419900  |
| F | 0.67267700  | -4.55550300 | 4.04512600  |
| H | -5.41120900 | -0.68010400 | -0.85099500 |
| C | -4.91177400 | -2.13009500 | 0.67988300  |
| C | -6.05157100 | -1.88108300 | 1.46037700  |
| C | -4.20070300 | -3.31947200 | 0.90285500  |
| C | -6.46444500 | -2.78387800 | 2.43221800  |
| H | -6.61070000 | -0.96423500 | 1.29565300  |
| C | -4.61345000 | -4.22022300 | 1.87729700  |
| H | -3.33522600 | -3.54826400 | 0.28773500  |

|   |             |             |            |
|---|-------------|-------------|------------|
| C | -5.74577600 | -3.95758100 | 2.64396500 |
| H | -7.34604600 | -2.56909600 | 3.02749400 |
| H | -4.05131200 | -5.13545500 | 2.03263700 |
| H | -6.06531200 | -4.66358300 | 3.40348200 |

### TS3b

Value of imaginary frequency = -288.46 cm<sup>-1</sup>

|   |             |             |             |
|---|-------------|-------------|-------------|
| P | 0.97695300  | 0.08409800  | -0.30007900 |
| O | 2.21806400  | 1.05814500  | -0.64328200 |
| O | 1.68070400  | -1.35297100 | -0.05867800 |
| O | -0.02700500 | 0.14471200  | -1.37712800 |
| C | 3.28510100  | 1.00695900  | 0.24795500  |
| C | 4.13442500  | -0.09503800 | 0.19371200  |
| C | 3.44726300  | 2.05055200  | 1.15873400  |
| C | 4.48551300  | 1.92446600  | 2.07484900  |
| C | 5.30516000  | 0.79226700  | 2.12137100  |
| H | 4.64501300  | 2.72567700  | 2.79279100  |
| C | 2.66597900  | -1.72982300 | -0.96371900 |
| C | 3.91031300  | -1.10156100 | -0.88783900 |
| C | 2.38547000  | -2.73215200 | -1.89266000 |
| C | 3.39345400  | -3.05398000 | -2.79637500 |
| C | 4.61895800  | -2.38513600 | -2.81860200 |
| H | 3.20435500  | -3.84046900 | -3.52322100 |
| C | 4.88218700  | -1.38812300 | -1.86743900 |
| C | 6.14702800  | -0.55285200 | -1.95880600 |
| C | 7.25420800  | -1.22384500 | -2.76717000 |
| H | 7.65902200  | -2.07561800 | -2.20444600 |
| C | 6.70610300  | -1.71501100 | -4.10319800 |
| H | 7.50489900  | -2.11927400 | -4.73174100 |
| C | 5.64240700  | -2.78287500 | -3.86475000 |
| H | 5.12636000  | -3.02971700 | -4.79809000 |
| H | 5.87507700  | 0.39702400  | -2.44120100 |
| C | 5.12853900  | -0.23563900 | 1.18333500  |
| C | 5.91543300  | -1.52880300 | 1.29730300  |
| C | 7.19677900  | -1.38176600 | 2.11299800  |
| H | 7.92926800  | -0.78900100 | 1.54886700  |
| C | 6.89741300  | -0.68805900 | 3.43831400  |
| H | 7.78668200  | -0.65402700 | 4.07448100  |
| C | 6.38977500  | 0.72781400  | 3.17970900  |
| H | 7.23071800  | 1.35393300  | 2.85171100  |
| H | 5.26217200  | -2.26652300 | 1.78471500  |
| H | 6.13395700  | -3.70775900 | -3.53359100 |
| H | 6.26674100  | -0.86835000 | -4.64533100 |
| H | 8.07769600  | -0.51933000 | -2.91602300 |



|   |             |             |             |
|---|-------------|-------------|-------------|
| H | 6.50950700  | -0.28024200 | -0.96558600 |
| H | 6.13483900  | -1.94170100 | 0.31011100  |
| H | 7.64237200  | -2.36715500 | 2.27796500  |
| H | 6.13510600  | -1.26162600 | 3.98022200  |
| H | 6.01725500  | 1.17898700  | 4.10497800  |
| O | 0.52765600  | 0.40684300  | 1.16238500  |
| H | -0.35324300 | 0.87073800  | 1.28847400  |
| C | 4.09225200  | 4.99072400  | -1.85168600 |
| C | 3.87983000  | 4.05545300  | -0.88285200 |
| C | 2.81781900  | 4.20328900  | 0.06800500  |
| C | 1.98276800  | 5.36598100  | -0.03216200 |
| C | 2.24302600  | 6.32588800  | -1.06075000 |
| C | 3.26347500  | 6.14649300  | -1.94491800 |
| C | 2.57335500  | 3.25753000  | 1.08533100  |
| C | 0.91961700  | 5.52970800  | 0.85661900  |
| C | 0.66004000  | 4.59242400  | 1.85528900  |
| C | 1.51276600  | 3.44206300  | 1.99196400  |
| C | 1.21683000  | 2.50462100  | 3.03670700  |
| H | 1.85165800  | 1.63251800  | 3.14739200  |
| C | 0.13260200  | 2.67568700  | 3.84392300  |
| C | -0.72969300 | 3.80194500  | 3.68512300  |
| C | -0.46554200 | 4.73372900  | 2.72940300  |
| H | 4.90272000  | 4.85817800  | -2.56123800 |
| H | 4.52299600  | 3.18415000  | -0.81963700 |
| H | 1.59607900  | 7.19666500  | -1.11888100 |
| H | 3.45229600  | 6.88014300  | -2.72194800 |
| H | 0.26051600  | 6.38942300  | 0.74519200  |
| H | -0.09019300 | 1.94213700  | 4.61221000  |
| H | -1.59958900 | 3.90013100  | 4.32555900  |
| H | -1.11080900 | 5.59708800  | 2.59191500  |
| C | -1.06153100 | -1.44835800 | -4.14246100 |
| C | 0.03967500  | -1.86963400 | -3.45684800 |
| C | 0.00733600  | -3.07142100 | -2.67788000 |
| C | -1.20618400 | -3.84644300 | -2.67792100 |
| C | -2.33379000 | -3.37293500 | -3.42135500 |
| C | -2.26868200 | -2.20811100 | -4.12573100 |
| C | 1.09671000  | -3.48846400 | -1.88779000 |
| C | -1.27418100 | -5.01548300 | -1.91771700 |
| C | -0.20741100 | -5.42734300 | -1.11733200 |
| C | 0.99925300  | -4.64640800 | -1.09031900 |
| C | 2.05596200  | -5.06781900 | -0.21766400 |
| H | 2.97007000  | -4.48460500 | -0.18506300 |
| C | 1.91905300  | -6.17338100 | 0.56904400  |
| C | 0.72120000  | -6.94696800 | 0.53778300  |

|   |             |             |             |
|---|-------------|-------------|-------------|
| C | -0.30497100 | -6.58510700 | -0.28181100 |
| H | -1.03057300 | -0.51263100 | -4.69086900 |
| H | 0.94278900  | -1.27033200 | -3.45342900 |
| H | -3.25140500 | -3.95420400 | -3.39629500 |
| H | -3.13790400 | -1.84714300 | -4.66814500 |
| H | -2.19201200 | -5.59899000 | -1.92213600 |
| H | 2.72710100  | -6.47035000 | 1.22946700  |
| H | 0.63274600  | -7.82233800 | 1.17255800  |
| H | -1.22381000 | -7.16389600 | -0.31135100 |
| C | -5.88305600 | -0.93148700 | -4.91918900 |
| C | -5.14240000 | 0.20477700  | -5.12977200 |
| C | -4.35042700 | 0.76149000  | -4.09569500 |
| C | -4.31640800 | 0.13227500  | -2.81924800 |
| C | -5.09949400 | -1.04120200 | -2.62759600 |
| C | -5.86070800 | -1.55221300 | -3.64872300 |
| H | -3.61203200 | 2.42646500  | -5.26222800 |
| H | -6.48625000 | -1.35079900 | -5.71728000 |
| H | -5.15013400 | 0.69807100  | -6.09831400 |
| C | -3.57166900 | 1.93338100  | -4.29456200 |
| C | -3.47152500 | 0.66657500  | -1.80422500 |
| H | -5.09388100 | -1.53896000 | -1.66187100 |
| H | -6.45259000 | -2.44617000 | -3.47826800 |
| C | -2.71500900 | 1.81517000  | -2.02550800 |
| C | -2.79213100 | 2.45234400  | -3.30291300 |
| H | -2.23348800 | 3.36713600  | -3.46726100 |
| C | -3.39864300 | -0.08784500 | -0.51845400 |
| C | -4.32793000 | 0.10960300  | 0.51529200  |
| N | -1.95356000 | 2.34826300  | -1.02956300 |
| C | -0.89144700 | 3.30413800  | -1.25315700 |
| H | -0.35738800 | 3.09111900  | -2.18796800 |
| H | -0.15846300 | 3.16654700  | -0.44548300 |
| H | -1.86429500 | 1.79963800  | -0.18752200 |
| N | -2.39582700 | -0.97179200 | -0.43604500 |
| C | -1.91117200 | -1.52995700 | 0.76995100  |
| C | -1.17204800 | -2.70197100 | 0.71404600  |
| C | -2.11816100 | -0.87637600 | 1.99177200  |
| C | -0.62311700 | -3.23918100 | 1.87269200  |
| H | -1.03322500 | -3.18766800 | -0.24114100 |
| C | -1.56306200 | -1.41167000 | 3.14523700  |
| C | -0.83260200 | -2.59882300 | 3.08649200  |
| H | -0.04499200 | -4.15754600 | 1.82051400  |
| H | -1.69217100 | -0.90373400 | 4.09600500  |
| C | -2.63692300 | 0.53432400  | 2.01154000  |
| O | -1.85205100 | 1.43259400  | 1.63352000  |

|   |             |             |             |
|---|-------------|-------------|-------------|
| C | -3.55971100 | 0.95719100  | 3.16673100  |
| F | -4.43543200 | 1.89498000  | 2.80656800  |
| F | -2.78282300 | 1.48340700  | 4.13335800  |
| F | -4.21523600 | -0.06318300 | 3.71596800  |
| H | -1.73798200 | -0.97958600 | -1.21988500 |
| C | -1.37453400 | 4.73992800  | -1.21621800 |
| C | -0.86095000 | 5.69766600  | -2.08726800 |
| C | -2.29976800 | 5.12812100  | -0.24358500 |
| C | -1.25157400 | 7.03218500  | -1.98126700 |
| H | -0.13292400 | 5.40195600  | -2.83943500 |
| C | -2.68742000 | 6.45861400  | -0.13342600 |
| H | -2.69722400 | 4.37276100  | 0.42985500  |
| C | -2.16067100 | 7.41649100  | -1.00049200 |
| H | -0.84535800 | 7.76993400  | -2.66686300 |
| H | -3.40242000 | 6.75215500  | 0.62935000  |
| H | -2.46557000 | 8.45473400  | -0.91636300 |
| C | -0.20626900 | -3.14516400 | 4.33588000  |
| F | 1.03861400  | -2.67740600 | 4.51345800  |
| F | -0.90762800 | -2.81058000 | 5.42952200  |
| F | -0.11835700 | -4.48247700 | 4.30174700  |
| H | -4.90166400 | 1.02194600  | 0.37474100  |
| C | -5.11417200 | -0.96708200 | 1.16235100  |
| C | -6.25341700 | -0.59008200 | 1.89336800  |
| C | -4.86366700 | -2.33888000 | 1.00692000  |
| C | -7.08611900 | -1.53644700 | 2.47004800  |
| H | -6.47254700 | 0.46704000  | 2.01333200  |
| C | -5.70447900 | -3.28688100 | 1.58384000  |
| H | -4.02834300 | -2.68249500 | 0.40701800  |
| C | -6.81275300 | -2.89523700 | 2.32471300  |
| H | -7.95560100 | -1.21214800 | 3.03298900  |
| H | -5.48697200 | -4.34117000 | 1.44472400  |
| H | -7.46264200 | -3.63774300 | 2.77553100  |

**IM6b**

|   |             |             |             |
|---|-------------|-------------|-------------|
| P | -1.09982500 | 0.06735700  | 0.20306700  |
| O | -2.14118400 | 1.18214100  | 0.72115800  |
| O | -2.03418800 | -1.21300900 | -0.13212100 |
| O | -0.33936400 | -0.24766300 | 1.53310400  |
| C | -3.19416900 | 1.40459800  | -0.16802900 |
| C | -4.22672300 | 0.46812000  | -0.19892900 |
| C | -3.15805200 | 2.52121100  | -1.00209900 |
| C | -4.20453900 | 2.65656000  | -1.90972800 |
| C | -5.22057000 | 1.70541700  | -2.02928700 |
| H | -4.20852600 | 3.52298100  | -2.56698100 |

|   |             |             |             |
|---|-------------|-------------|-------------|
| C | -3.06406000 | -1.50433500 | 0.75621700  |
| C | -4.17911700 | -0.66430500 | 0.77397100  |
| C | -2.95266300 | -2.61990000 | 1.58649900  |
| C | -3.99886100 | -2.85224700 | 2.47473500  |
| C | -5.09324700 | -1.99191100 | 2.58363100  |
| H | -3.93879400 | -3.72012000 | 3.12737900  |
| C | -5.18140100 | -0.87353300 | 1.74124200  |
| C | -6.27907100 | 0.15637400  | 1.94210000  |
| C | -7.48488600 | -0.39087800 | 2.70073500  |
| H | -8.03324900 | -1.09803100 | 2.06408800  |
| C | -7.02804700 | -1.10271800 | 3.97007700  |
| H | -7.88368600 | -1.42357000 | 4.57133900  |
| C | -6.16797100 | -2.30956000 | 3.60568600  |
| H | -5.70091400 | -2.73558100 | 4.49944300  |
| H | -5.84393200 | 0.98933500  | 2.51271600  |
| C | -5.22991100 | 0.58830300  | -1.18069100 |
| C | -6.23362200 | -0.53101900 | -1.39122300 |
| C | -7.46914300 | -0.09047600 | -2.17143700 |
| H | -8.08438000 | 0.57163700  | -1.54754900 |
| C | -7.05354900 | 0.65060300  | -3.43847900 |
| H | -7.92379200 | 0.89645100  | -4.05398000 |
| C | -6.30146900 | 1.92635500  | -3.06974600 |
| H | -7.01671800 | 2.66013700  | -2.67388800 |
| H | -5.72139400 | -1.32761900 | -1.94949200 |
| H | -6.81449800 | -3.09659900 | 3.19430500  |
| H | -6.44605300 | -0.40460100 | 4.58466900  |
| H | -8.17255100 | 0.42687800  | 2.93539700  |
| H | -6.59025200 | 0.58901800  | 0.98903100  |
| H | -6.52257100 | -0.98277100 | -0.43992000 |
| H | -8.08248200 | -0.96397400 | -2.41121900 |
| H | -6.40677700 | -0.00010800 | -4.04015200 |
| H | -5.85692100 | 2.38385000  | -3.95939100 |
| O | -0.31898600 | 0.43996100  | -0.99038300 |
| H | 1.23638700  | 1.06264900  | -1.74185500 |
| C | -3.18277500 | 5.43622200  | 2.11204300  |
| C | -3.16313300 | 4.50208300  | 1.11928600  |
| C | -2.13608400 | 4.50696600  | 0.12027100  |
| C | -1.13469500 | 5.53378100  | 0.18784700  |
| C | -1.19419200 | 6.49692400  | 1.24424700  |
| C | -2.18328300 | 6.45027100  | 2.18004000  |
| C | -2.07639400 | 3.54538400  | -0.90880100 |
| C | -0.10593200 | 5.55630200  | -0.75458100 |
| C | -0.02185300 | 4.59203500  | -1.75822900 |
| C | -1.02917200 | 3.57029800  | -1.84985300 |

|   |             |             |             |
|---|-------------|-------------|-------------|
| C | -0.90100900 | 2.58923600  | -2.88861900 |
| H | -1.64361500 | 1.80237800  | -2.95662700 |
| C | 0.16129200  | 2.60788400  | -3.74280900 |
| C | 1.16991900  | 3.61243700  | -3.63609900 |
| C | 1.07378500  | 4.57655900  | -2.68053000 |
| H | -3.96702300 | 5.41088900  | 2.86176200  |
| H | -3.93100800 | 3.73685300  | 1.07751900  |
| H | -0.42062700 | 7.25901100  | 1.28250800  |
| H | -2.21769700 | 7.18359100  | 2.97921800  |
| H | 0.67200800  | 6.31417200  | -0.67612600 |
| H | 0.25563800  | 1.83863200  | -4.50311900 |
| H | 2.01870400  | 3.58853200  | -4.31113800 |
| H | 1.83631100  | 5.34362500  | -2.57741100 |
| C | 0.37796900  | -2.16456200 | 4.24645700  |
| C | -0.70420100 | -2.34760000 | 3.43890100  |
| C | -0.71576300 | -3.38124600 | 2.44543500  |
| C | 0.42062600  | -4.26014900 | 2.37044000  |
| C | 1.53395000  | -4.03168200 | 3.24070700  |
| C | 1.52178400  | -3.00962800 | 4.14049600  |
| C | -1.77381800 | -3.53484100 | 1.52836700  |
| C | 0.42931900  | -5.28930500 | 1.42860700  |
| C | -0.62019300 | -5.45962900 | 0.52356300  |
| C | -1.73677300 | -4.55560500 | 0.55716100  |
| C | -2.76615000 | -4.71744800 | -0.42592000 |
| H | -3.61069000 | -4.03641300 | -0.41362700 |
| C | -2.69256000 | -5.70356000 | -1.36557300 |
| C | -1.58697600 | -6.60387100 | -1.39191200 |
| C | -0.58540200 | -6.48319200 | -0.47556000 |
| H | 0.38355700  | -1.35329600 | 4.96712000  |
| H | -1.55623100 | -1.68081700 | 3.50578100  |
| H | 2.40152600  | -4.67963600 | 3.15051200  |
| H | 2.38656000  | -2.82288000 | 4.77071200  |
| H | 1.28688600  | -5.95638500 | 1.37877000  |
| H | -3.48039900 | -5.80629200 | -2.10457400 |
| H | -1.54665600 | -7.38035200 | -2.14863500 |
| H | 0.26568800  | -7.15827200 | -0.49000700 |
| C | 5.19560700  | -2.02651100 | 5.02548900  |
| C | 4.65624800  | -0.79012800 | 5.27678700  |
| C | 3.97820900  | -0.06921800 | 4.26224400  |
| C | 3.84626500  | -0.63966400 | 2.96406700  |
| C | 4.41367700  | -1.92409600 | 2.73405800  |
| C | 5.07175800  | -2.59242200 | 3.73442000  |
| H | 3.55101000  | 1.66657900  | 5.47778300  |
| H | 5.71704900  | -2.56839400 | 5.80738300  |

|   |             |             |             |
|---|-------------|-------------|-------------|
| H | 4.74409600  | -0.33860900 | 6.26167400  |
| C | 3.42595700  | 1.21796700  | 4.49582100  |
| C | 3.15283100  | 0.08590300  | 1.95975200  |
| H | 4.31347700  | -2.37952000 | 1.75458000  |
| H | 5.49979700  | -3.56990900 | 3.53368000  |
| C | 2.57204100  | 1.32713600  | 2.22781000  |
| C | 2.75346100  | 1.90049100  | 3.52303500  |
| H | 2.36019700  | 2.89028000  | 3.72490500  |
| C | 2.94321500  | -0.46674400 | 0.59431400  |
| C | 3.85853200  | -0.00735800 | -0.53414400 |
| N | 1.81553600  | 1.95135700  | 1.27687300  |
| C | 1.14214400  | 3.21514800  | 1.44589500  |
| H | 0.63450200  | 3.25404300  | 2.41687800  |
| H | 0.34867200  | 3.24571200  | 0.68874800  |
| H | 1.76798900  | 1.55143200  | 0.34844300  |
| N | 1.93169400  | -1.22947000 | 0.40230300  |
| C | 1.64758600  | -1.70091300 | -0.90202900 |
| C | 0.76129900  | -2.76377500 | -1.00240200 |
| C | 2.17285500  | -1.08807200 | -2.05058500 |
| C | 0.39055800  | -3.24920100 | -2.25033800 |
| H | 0.36279100  | -3.18467000 | -0.08896900 |
| C | 1.79668200  | -1.56948500 | -3.29658900 |
| C | 0.91736900  | -2.65084900 | -3.38840600 |
| H | -0.30483100 | -4.07937800 | -2.32935100 |
| H | 2.17818000  | -1.11806700 | -4.20565200 |
| C | 3.00084500  | 0.15786300  | -1.81216400 |
| O | 2.17614800  | 1.28410600  | -1.58744800 |
| C | 3.88076500  | 0.53558000  | -3.00709600 |
| F | 4.72106400  | 1.52548800  | -2.67730700 |
| F | 3.13252200  | 0.97546200  | -4.03247000 |
| F | 4.60882600  | -0.49068900 | -3.45803000 |
| H | 0.51883400  | -0.73776300 | 1.36543700  |
| C | 2.04040800  | 4.42263300  | 1.26261100  |
| C | 1.92585700  | 5.53772500  | 2.08963100  |
| C | 2.94452000  | 4.45332000  | 0.19682200  |
| C | 2.69013700  | 6.67924300  | 1.85047100  |
| H | 1.21709700  | 5.51986900  | 2.91474400  |
| C | 3.70820500  | 5.59035700  | -0.04242400 |
| H | 3.02135200  | 3.58877600  | -0.46049100 |
| C | 3.58012200  | 6.70884600  | 0.78132100  |
| H | 2.59219300  | 7.54239900  | 2.50188500  |
| H | 4.40279700  | 5.60758600  | -0.87706000 |
| H | 4.17670000  | 7.59576700  | 0.59311000  |
| C | 0.49096600  | -3.10960700 | -4.75213400 |

|   |             |             |             |
|---|-------------|-------------|-------------|
| F | -0.44970600 | -2.30656100 | -5.27451800 |
| F | 1.51814000  | -3.10892100 | -5.61710700 |
| F | -0.01758300 | -4.34907700 | -4.72908000 |
| H | 4.19237300  | 1.00185500  | -0.27136800 |
| C | 5.08638700  | -0.89414300 | -0.66362600 |
| C | 6.35123600  | -0.30603900 | -0.68322400 |
| C | 4.98417200  | -2.28417600 | -0.78020100 |
| C | 7.49479700  | -1.08804700 | -0.81325400 |
| H | 6.43787500  | 0.77317000  | -0.59864300 |
| C | 6.12688700  | -3.06500800 | -0.91222200 |
| H | 4.00932800  | -2.76329200 | -0.76073700 |
| C | 7.38530300  | -2.46944800 | -0.92910200 |
| H | 8.47141900  | -0.61530500 | -0.82236200 |
| H | 6.03254400  | -4.14238400 | -1.00092200 |
| H | 8.27603000  | -3.08083600 | -1.02979600 |

**IM7b**

|   |             |            |             |
|---|-------------|------------|-------------|
| C | 2.75070500  | 4.75453500 | -2.19535600 |
| C | 3.71458100  | 4.00911200 | -1.56950000 |
| C | 3.39992000  | 2.75886600 | -0.98056700 |
| C | 2.06695300  | 2.26207800 | -1.04022600 |
| C | 1.08949300  | 3.06117200 | -1.69550600 |
| C | 1.42472200  | 4.26802500 | -2.25358700 |
| H | 5.40877900  | 2.35612700 | -0.29439000 |
| H | 2.99806600  | 5.71092700 | -2.64363000 |
| H | 4.74008100  | 4.36429800 | -1.51119000 |
| C | 4.38972000  | 1.98037100 | -0.32837100 |
| C | 1.76206900  | 1.01424900 | -0.41510500 |
| H | 0.07072300  | 2.69965600 | -1.76307900 |
| H | 0.65992700  | 4.85780100 | -2.74918000 |
| C | 2.76660000  | 0.26005600 | 0.19444400  |
| C | 4.09691500  | 0.77072200 | 0.23231700  |
| H | 4.88507900  | 0.17848100 | 0.68227200  |
| C | 0.37330900  | 0.49324100 | -0.38526300 |
| C | -0.27473600 | 0.35423900 | 0.99047800  |
| H | 0.50566000  | 0.10037200 | 1.71174900  |
| C | -0.89754200 | 1.67373100 | 1.42677700  |
| C | -0.63924700 | 2.14574600 | 2.71531400  |
| C | -1.72035600 | 2.42687200 | 0.58492100  |
| C | -1.19379600 | 3.34169800 | 3.15818900  |
| H | -0.00068400 | 1.56703000 | 3.37610300  |
| C | -2.27574600 | 3.62255600 | 1.02822600  |
| H | -1.93228900 | 2.08399200 | -0.42308700 |
| C | -2.01518400 | 4.08301600 | 2.31517200  |

|   |             |             |             |
|---|-------------|-------------|-------------|
| H | -0.98033100 | 3.69458200  | 4.16181700  |
| H | -2.91166200 | 4.19677600  | 0.36250300  |
| H | -2.44734000 | 5.01757300  | 2.65746400  |
| N | 2.48237100  | -0.97291400 | 0.74381900  |
| C | 3.45880300  | -1.80848400 | 1.39598600  |
| H | 2.90074800  | -2.58711500 | 1.92683900  |
| H | 3.98037900  | -1.23177700 | 2.17059800  |
| H | 1.61146800  | -1.41929800 | 0.48942600  |
| N | -0.23774100 | 0.22878400  | -1.48033800 |
| C | -1.55801400 | -0.25702900 | -1.42238200 |
| C | -2.30369300 | -0.20581300 | -2.60055400 |
| C | -2.13958900 | -0.77176800 | -0.24776700 |
| C | -3.61786700 | -0.65264600 | -2.62151900 |
| H | -1.82559400 | 0.19816200  | -3.48600900 |
| C | -3.45195800 | -1.22897200 | -0.27571900 |
| C | -4.18610100 | -1.16168600 | -1.45858300 |
| H | -4.20449000 | -0.60249100 | -3.53226000 |
| H | -3.92686900 | -1.61950700 | 0.61724500  |
| C | -1.22883000 | -0.84929700 | 0.96061000  |
| O | -0.37361900 | -1.98307600 | 0.86652300  |
| C | -1.98849600 | -0.98673100 | 2.28297900  |
| F | -1.16519700 | -0.85702100 | 3.32728800  |
| F | -2.54090600 | -2.21541300 | 2.36623000  |
| F | -2.97212100 | -0.09693700 | 2.41299000  |
| C | 4.48570600  | -2.46527700 | 0.48437600  |
| C | 5.61373000  | -3.06380500 | 1.04979800  |
| C | 4.32198100  | -2.50014200 | -0.89871800 |
| C | 6.55714800  | -3.69609700 | 0.24830500  |
| H | 5.75259500  | -3.03318000 | 2.12832300  |
| C | 5.26835900  | -3.13038600 | -1.70348300 |
| H | 3.45477500  | -2.02367700 | -1.34617000 |
| C | 6.38589400  | -3.73099800 | -1.13379600 |
| H | 7.42906600  | -4.15749100 | 0.70107900  |
| H | 5.13154200  | -3.14752000 | -2.78009000 |
| H | 7.12316900  | -4.21995400 | -1.76215700 |
| C | -5.58528400 | -1.70490800 | -1.48280200 |
| F | -5.60104700 | -3.02146800 | -1.74626300 |
| F | -6.20241500 | -1.53820100 | -0.30422400 |
| F | -6.33294500 | -1.10968900 | -2.42248600 |
| H | -0.91559100 | -2.75916800 | 0.67294900  |

#### IM2-III

|   |            |            |             |
|---|------------|------------|-------------|
| P | 1.23884800 | 0.11867500 | 0.67618000  |
| O | 1.55958700 | 1.06806800 | -0.65793100 |



|   |             |             |             |
|---|-------------|-------------|-------------|
| O | 2.68076700  | 0.21130800  | 1.45644100  |
| O | 1.05922200  | -1.24599400 | 0.08004100  |
| C | 2.10822900  | 2.30319000  | -0.41181500 |
| C | 3.46364800  | 2.36409100  | -0.08367800 |
| C | 1.31012500  | 3.44439500  | -0.52316100 |
| C | 1.91076500  | 4.66423100  | -0.22278200 |
| C | 3.23769500  | 4.75775900  | 0.20533300  |
| H | 1.31692900  | 5.57197000  | -0.30723500 |
| C | 3.78946400  | 0.01819200  | 0.66129400  |
| C | 4.23012400  | 1.08132900  | -0.13360600 |
| C | 4.41609600  | -1.22960500 | 0.65011600  |
| C | 5.50063300  | -1.38956600 | -0.20820400 |
| C | 5.93385500  | -0.37374600 | -1.06261900 |
| H | 6.00388500  | -2.35369800 | -0.23390100 |
| C | 5.28235800  | 0.86970600  | -1.04691800 |
| C | 5.61949400  | 1.92216400  | -2.08895600 |
| C | 7.00537200  | 1.73878600  | -2.70086100 |
| H | 7.77353000  | 1.97352500  | -1.95196200 |
| C | 7.18408100  | 0.30011200  | -3.17473100 |
| H | 8.13873900  | 0.17096900  | -3.69342800 |
| C | 7.10715900  | -0.65268000 | -1.98419800 |
| H | 7.05924700  | -1.69311400 | -2.32447400 |
| H | 4.86403100  | 1.84829800  | -2.88591200 |
| C | 4.02563000  | 3.59941100  | 0.28791700  |
| C | 5.42926400  | 3.65616100  | 0.86174200  |
| C | 6.03864800  | 5.05474000  | 0.81771700  |
| H | 6.27117400  | 5.32539300  | -0.22108100 |
| C | 5.05830900  | 6.07080100  | 1.39640300  |
| H | 5.51244800  | 7.06428300  | 1.45901800  |
| C | 3.79958400  | 6.12790900  | 0.53489400  |
| H | 4.03636400  | 6.64363600  | -0.40588400 |
| H | 5.37022600  | 3.32333600  | 1.90775900  |
| H | 8.03471200  | -0.56675200 | -1.40201400 |
| H | 6.39328600  | 0.06283200  | -3.89860600 |
| H | 7.13891400  | 2.44259900  | -3.52777400 |
| H | 5.51179100  | 2.92883200  | -1.68047200 |
| H | 6.08166000  | 2.93418600  | 0.36415400  |
| H | 6.98360300  | 5.06338800  | 1.36920500  |
| H | 4.79411500  | 5.77232500  | 2.41875100  |
| H | 3.02550600  | 6.72835100  | 1.02406200  |
| O | 0.21203600  | 0.79363200  | 1.51629400  |
| C | 0.38930900  | 2.00278500  | -4.44786300 |
| C | 0.67642100  | 2.48883600  | -3.20590000 |
| C | -0.36481900 | 2.86824200  | -2.29415100 |

|   |             |             |             |
|---|-------------|-------------|-------------|
| C | -1.72250500 | 2.76304600  | -2.75160800 |
| C | -1.98393400 | 2.21680300  | -4.04930900 |
| C | -0.96337900 | 1.84964200  | -4.87480800 |
| C | -0.10159300 | 3.34448400  | -0.99027600 |
| C | -2.76172500 | 3.20706900  | -1.93313200 |
| C | -2.51345100 | 3.71935500  | -0.66102300 |
| C | -1.16641900 | 3.74884000  | -0.15834300 |
| C | -0.96830700 | 4.16742300  | 1.19862700  |
| H | 0.03131100  | 4.12097900  | 1.61553100  |
| C | -2.01700200 | 4.58628600  | 1.96370100  |
| C | -3.34490500 | 4.60484300  | 1.44353000  |
| C | -3.58363000 | 4.17056800  | 0.17557700  |
| H | 1.19637200  | 1.71965800  | -5.11613500 |
| H | 1.71017100  | 2.59653400  | -2.89526900 |
| H | -3.01988900 | 2.10753400  | -4.35745200 |
| H | -1.17230900 | 1.44618500  | -5.86072900 |
| H | -3.78652100 | 3.14430600  | -2.29315700 |
| H | -1.84489900 | 4.89025900  | 2.99140800  |
| H | -4.16895900 | 4.91675900  | 2.07763700  |
| H | -4.59503600 | 4.13613500  | -0.22068500 |
| C | 2.36401900  | -4.59488900 | -1.01796600 |
| C | 2.99802100  | -3.51827200 | -0.47403700 |
| C | 3.33343000  | -3.47955800 | 0.91763300  |
| C | 2.97084800  | -4.60572800 | 1.73340200  |
| C | 2.32190300  | -5.72647700 | 1.12048300  |
| C | 2.02688400  | -5.72225300 | -0.21062400 |
| C | 3.94906200  | -2.35733700 | 1.50787700  |
| C | 3.21874000  | -4.56780100 | 3.10567700  |
| C | 3.78188700  | -3.44290100 | 3.70957700  |
| C | 4.15501000  | -2.31429700 | 2.90163000  |
| C | 4.71790400  | -1.17279500 | 3.55984700  |
| H | 5.00723500  | -0.31541400 | 2.96226600  |
| C | 4.88054700  | -1.14993700 | 4.91343600  |
| C | 4.50218200  | -2.26877900 | 5.71245600  |
| C | 3.97429700  | -3.37881100 | 5.12599800  |
| H | 2.10574000  | -4.58583100 | -2.07278300 |
| H | 3.22158400  | -2.65375300 | -1.08554100 |
| H | 2.06354500  | -6.57640200 | 1.74641300  |
| H | 1.52903100  | -6.57518400 | -0.66146400 |
| H | 2.93838100  | -5.41848800 | 3.72267000  |
| H | 5.30087600  | -0.27141400 | 5.39209200  |
| H | 4.63736600  | -2.22917800 | 6.78842700  |
| H | 3.68047400  | -4.23752100 | 5.72310800  |
| H | -0.17333900 | -1.70225400 | -0.89066200 |

|   |             |             |             |
|---|-------------|-------------|-------------|
| C | -6.51737800 | -4.27108500 | -0.82059700 |
| C | -5.91435800 | -3.74335400 | -1.94882400 |
| C | -4.57390900 | -3.33377800 | -1.91023700 |
| C | -3.83699600 | -3.45338100 | -0.71736100 |
| C | -4.45477000 | -3.99384000 | 0.41328700  |
| C | -5.78032500 | -4.39839700 | 0.36012800  |
| H | -4.51268000 | -2.74591900 | -4.00154300 |
| H | -7.55645500 | -4.57943100 | -0.85067500 |
| H | -6.47376300 | -3.62854500 | -2.87268300 |
| C | -3.93101100 | -2.78348600 | -3.08453200 |
| C | -2.44214200 | -2.97333500 | -0.68622400 |
| H | -3.88881600 | -4.08312200 | 1.33570000  |
| H | -6.24925900 | -4.80905700 | 1.24812200  |
| C | -1.89136800 | -2.28368800 | -1.87178400 |
| C | -2.67261100 | -2.29757700 | -3.08730300 |
| H | -2.26062200 | -1.86730100 | -3.99020700 |
| C | -1.65416100 | -3.12437300 | 0.37265600  |
| C | -0.77497300 | -3.24049000 | 1.32692600  |
| C | -0.62984600 | -2.32474700 | 2.47730000  |
| C | 0.64361900  | -2.14901300 | 3.02437400  |
| C | -1.71700300 | -1.63707400 | 3.01515300  |
| C | 0.83553400  | -1.28435200 | 4.09218100  |
| H | 1.48348300  | -2.66236000 | 2.57411500  |
| C | -1.52546200 | -0.79098100 | 4.10304500  |
| H | -2.70929100 | -1.77020300 | 2.59090100  |
| C | -0.25407700 | -0.60905000 | 4.63804400  |
| H | 1.83723000  | -1.13710400 | 4.48705800  |
| H | -2.37677300 | -0.26599700 | 4.52537600  |
| H | -0.11146500 | 0.06225100  | 5.47873900  |
| N | -0.73160700 | -1.69848800 | -1.78622300 |
| C | -0.08579100 | -0.84876100 | -2.78528500 |
| H | -0.80635200 | -0.55437400 | -3.54978500 |
| H | 0.21770000  | 0.05809200  | -2.25365300 |
| C | 1.13619600  | -1.51123200 | -3.38090600 |
| C | 1.00026700  | -2.58459500 | -4.26373300 |
| C | 2.41151400  | -1.06314000 | -3.03528500 |
| C | 2.12501600  | -3.20241200 | -4.80062600 |
| H | 0.00803200  | -2.94304700 | -4.52951500 |
| C | 3.53797100  | -1.68248200 | -3.57374600 |
| H | 2.51469100  | -0.24755700 | -2.32274900 |
| C | 3.39774400  | -2.75162000 | -4.45369800 |
| H | 2.00993400  | -4.03452700 | -5.48785800 |
| H | 4.52545600  | -1.33697100 | -3.28033700 |
| H | 4.27644000  | -3.23551300 | -4.86792500 |

|   |             |             |             |
|---|-------------|-------------|-------------|
| H | -0.06733300 | -4.07214600 | 1.25174500  |
| C | -4.05664700 | 1.59730000  | 2.73432300  |
| C | -5.36914700 | 1.56424200  | 2.20868700  |
| C | -5.58156400 | 1.13686900  | 0.92245000  |
| C | -4.49730500 | 0.75750700  | 0.09902900  |
| C | -3.16799800 | 0.83666900  | 0.61285800  |
| C | -2.98431000 | 1.23857900  | 1.96828900  |
| H | -3.90273900 | 1.93772500  | 3.75502600  |
| H | -6.59395100 | 1.11048100  | 0.53700400  |
| H | -1.96481600 | 1.28094600  | 2.34096700  |
| N | -2.07834600 | 0.52736200  | -0.10310700 |
| H | -2.15783600 | 0.49174200  | -1.10871600 |
| H | -1.17958600 | 0.70479500  | 0.35394800  |
| C | -6.48934400 | 2.06503800  | 3.05604900  |
| F | -7.69204300 | 1.82504100  | 2.51358300  |
| F | -6.48091200 | 1.50779700  | 4.28005300  |
| F | -6.40759400 | 3.39674100  | 3.25551700  |
| C | -4.70628700 | 0.30327800  | -1.26159800 |
| O | -3.84101100 | 0.16098900  | -2.11450500 |
| C | -6.14504300 | -0.06345400 | -1.69752600 |
| F | -6.73021100 | -0.89249700 | -0.82578900 |
| F | -6.13632300 | -0.66118600 | -2.88778600 |
| F | -6.91186800 | 1.03458000  | -1.79534700 |

### IM2-III'

|   |            |             |             |
|---|------------|-------------|-------------|
| P | 1.29236000 | 0.13711700  | -0.45328900 |
| O | 1.95378200 | -1.28739800 | 0.07943700  |
| O | 2.60168400 | 0.81347700  | -1.18372400 |
| O | 0.99423400 | 0.89170900  | 0.81168000  |
| C | 2.60298900 | -2.03541700 | -0.87750100 |
| C | 3.88031100 | -1.63424600 | -1.26886100 |
| C | 1.97089800 | -3.15856200 | -1.40998300 |
| C | 2.64547500 | -3.84211700 | -2.41839000 |
| C | 3.88389100 | -3.41757500 | -2.90701100 |
| H | 2.17790500 | -4.72287900 | -2.85324100 |
| C | 3.79637300 | 0.72273200  | -0.49761300 |
| C | 4.48779700 | -0.49287200 | -0.52150000 |
| C | 4.27058300 | 1.82791300  | 0.21192000  |
| C | 5.46073400 | 1.67290000  | 0.91763000  |
| C | 6.14663500 | 0.45868900  | 0.96968400  |
| H | 5.84638300 | 2.52413900  | 1.47428300  |
| C | 5.64814100 | -0.64653400 | 0.26273800  |
| C | 6.27189300 | -2.01930800 | 0.44843000  |
| C | 7.70175200 | -1.96653700 | 0.97955000  |

|   |             |             |             |
|---|-------------|-------------|-------------|
| H | 8.37239500  | -1.58787800 | 0.19672400  |
| C | 7.78038000  | -1.04977300 | 2.19598900  |
| H | 8.77953800  | -1.07053600 | 2.64128300  |
| C | 7.41982500  | 0.37630200  | 1.78994300  |
| H | 7.32317000  | 1.01748000  | 2.67236000  |
| H | 5.64395300  | -2.56934200 | 1.16504800  |
| C | 4.50942300  | -2.29726700 | -2.33838000 |
| C | 5.79190300  | -1.74227300 | -2.92999900 |
| C | 6.55602900  | -2.76397200 | -3.76757200 |
| H | 6.99006100  | -3.53106500 | -3.11215300 |
| C | 5.61457300  | -3.42861300 | -4.76776300 |
| H | 6.16184200  | -4.09636100 | -5.43984100 |
| C | 4.53430000  | -4.21026200 | -4.02499600 |
| H | 4.98367400  | -5.11549000 | -3.59411400 |
| H | 5.51731900  | -0.88965200 | -3.56714500 |
| H | 8.24495600  | 0.79501800  | 1.19771200  |
| H | 7.07967600  | -1.40738100 | 2.96163200  |
| H | 8.03890700  | -2.97748400 | 1.22728600  |
| H | 6.23069200  | -2.59945600 | -0.47544500 |
| H | 6.43198200  | -1.32579600 | -2.14828000 |
| H | 7.38890600  | -2.27284400 | -4.27959900 |
| H | 5.14923100  | -2.65469200 | -5.39104500 |
| H | 3.76202100  | -4.55553300 | -4.72018000 |
| O | 0.26095600  | -0.13289600 | -1.49197800 |
| C | 1.46221700  | -4.43198500 | 2.65821900  |
| C | 1.62713100  | -4.05300700 | 1.35815600  |
| C | 0.53442000  | -4.08208400 | 0.42959100  |
| C | -0.72777900 | -4.58496400 | 0.89800600  |
| C | -0.85382000 | -4.99304200 | 2.26477200  |
| C | 0.20019100  | -4.90550900 | 3.12446700  |
| C | 0.64864400  | -3.61491300 | -0.89736100 |
| C | -1.80957900 | -4.65424000 | 0.01964500  |
| C | -1.72065900 | -4.15767700 | -1.28039600 |
| C | -0.48225000 | -3.59172400 | -1.73822500 |
| C | -0.46459400 | -2.95982800 | -3.02435600 |
| H | 0.44134500  | -2.45699200 | -3.34241400 |
| C | -1.58233300 | -2.93368000 | -3.80424300 |
| C | -2.79579600 | -3.54156900 | -3.36661900 |
| C | -2.86279200 | -4.13226800 | -2.14198700 |
| H | 2.29825100  | -4.37475400 | 3.34763400  |
| H | 2.59591600  | -3.70416300 | 1.01733200  |
| H | -1.81674600 | -5.36923200 | 2.60062800  |
| H | 0.09034400  | -5.20578800 | 4.16156100  |
| H | -2.75672200 | -5.06376900 | 0.36754900  |

|   |             |             |             |
|---|-------------|-------------|-------------|
| H | -1.55794200 | -2.42637900 | -4.76303100 |
| H | -3.67361900 | -3.50324800 | -4.00344900 |
| H | -3.79543100 | -4.55052300 | -1.77231800 |
| C | 1.95658200  | 3.02081100  | 3.60913500  |
| C | 2.68285800  | 2.64561100  | 2.51943200  |
| C | 2.82481800  | 3.51045300  | 1.38649800  |
| C | 2.16321600  | 4.78506100  | 1.42040400  |
| C | 1.43160400  | 5.15536300  | 2.59580700  |
| C | 1.33041900  | 4.30246000  | 3.65485700  |
| C | 3.53612300  | 3.12534600  | 0.23336500  |
| C | 2.22230800  | 5.61948600  | 0.30465700  |
| C | 2.89707000  | 5.23536100  | -0.85424500 |
| C | 3.56890200  | 3.96695500  | -0.89594300 |
| C | 4.23516700  | 3.59583900  | -2.10889800 |
| H | 4.75182400  | 2.64287800  | -2.15002800 |
| C | 4.21703700  | 4.41502500  | -3.19935000 |
| C | 3.53888300  | 5.66840700  | -3.15791300 |
| C | 2.90507800  | 6.06471400  | -2.01927300 |
| H | 1.84603400  | 2.33229600  | 4.44227200  |
| H | 3.13130700  | 1.66072400  | 2.47925400  |
| H | 0.95401100  | 6.13160000  | 2.61769600  |
| H | 0.76771400  | 4.59249700  | 4.53690400  |
| H | 1.71057700  | 6.57902400  | 0.32805100  |
| H | 4.72167200  | 4.11226100  | -4.11122900 |
| H | 3.53126000  | 6.30255500  | -4.03844700 |
| H | 2.38122400  | 7.01546500  | -1.97627500 |
| H | -0.25789900 | 0.50715100  | 1.64156100  |
| C | -7.03185600 | 1.59144800  | 1.85177300  |
| C | -6.39982300 | 0.55253800  | 2.51054000  |
| C | -4.99888400 | 0.47902000  | 2.53672400  |
| C | -4.22884000 | 1.45551300  | 1.88223600  |
| C | -4.88069100 | 2.50950100  | 1.23494700  |
| C | -6.26436300 | 2.57765700  | 1.22287200  |
| H | -4.94357300 | -1.31096900 | 3.76707500  |
| H | -8.11462600 | 1.63987700  | 1.81677600  |
| H | -6.97610800 | -0.22914800 | 2.99648900  |
| C | -4.32793600 | -0.61040400 | 3.21115400  |
| C | -2.75761400 | 1.31625100  | 1.85270900  |
| H | -4.29097900 | 3.26179700  | 0.72167700  |
| H | -6.75514000 | 3.39096000  | 0.69918900  |
| C | -2.14426300 | 0.08856000  | 2.40289300  |
| C | -2.99415300 | -0.80674000 | 3.15938800  |
| H | -2.55371100 | -1.65232200 | 3.67031600  |
| C | -1.98980200 | 2.27586300  | 1.34249600  |

|   |             |             |             |
|---|-------------|-------------|-------------|
| C | -1.25245200 | 3.24831000  | 0.89257400  |
| C | -1.00506700 | 3.50853700  | -0.55884500 |
| C | 0.25213900  | 3.27415800  | -1.11310300 |
| C | -2.03786500 | 3.99579500  | -1.36214600 |
| C | 0.46780400  | 3.49666500  | -2.46996500 |
| H | 1.04684800  | 2.89109200  | -0.48448500 |
| C | -1.81767700 | 4.22704300  | -2.71726000 |
| H | -3.02112700 | 4.17433000  | -0.93917700 |
| C | -0.56573900 | 3.97190100  | -3.27301600 |
| H | 1.44947000  | 3.29196400  | -2.88823100 |
| H | -2.63455400 | 4.58374800  | -3.33581900 |
| H | -0.39691100 | 4.14297200  | -4.33141600 |
| N | -0.87673900 | -0.13750700 | 2.22607300  |
| C | -0.10212800 | -1.30275800 | 2.65569600  |
| H | -0.75816000 | -2.10013200 | 3.00635600  |
| H | 0.41541500  | -1.67167700 | 1.76594900  |
| C | 0.91321700  | -0.91478800 | 3.70753600  |
| C | 0.50932000  | -0.64851400 | 5.01669400  |
| C | 2.26136200  | -0.80028200 | 3.36701000  |
| C | 1.44233200  | -0.28123500 | 5.98106000  |
| H | -0.54245900 | -0.72858700 | 5.28343300  |
| C | 3.19605600  | -0.43382500 | 4.33305600  |
| H | 2.56563600  | -0.98503100 | 2.33944800  |
| C | 2.78964800  | -0.17477800 | 5.63941700  |
| H | 1.12031900  | -0.08045500 | 6.99780300  |
| H | 4.24281100  | -0.34152600 | 4.05809600  |
| H | 3.51910500  | 0.11155000  | 6.39031000  |
| H | -0.79851500 | 3.91965500  | 1.62800400  |
| C | -3.74585400 | -1.86246300 | 0.04503300  |
| C | -5.13497100 | -1.65068300 | -0.09152900 |
| C | -5.59252200 | -0.57734400 | -0.81637300 |
| C | -4.69470600 | 0.32353500  | -1.42588600 |
| C | -3.28221800 | 0.10468000  | -1.30174900 |
| C | -2.84334400 | -1.02703800 | -0.55022600 |
| H | -3.38746700 | -2.71168400 | 0.61939500  |
| H | -6.66123200 | -0.42703200 | -0.90852400 |
| H | -1.77180600 | -1.20710700 | -0.48706100 |
| N | -2.35866700 | 0.90172800  | -1.83864300 |
| H | -2.63687600 | 1.72310400  | -2.35512900 |
| H | -1.36973900 | 0.64336200  | -1.76655600 |
| C | -6.06975400 | -2.60596800 | 0.56238800  |
| F | -7.34779100 | -2.39599600 | 0.22396400  |
| F | -5.77323300 | -3.88498100 | 0.25462100  |
| F | -6.01412000 | -2.54308800 | 1.91486300  |

|   |             |            |             |
|---|-------------|------------|-------------|
| C | -5.18427700 | 1.47295000 | -2.16565800 |
| O | -4.50131100 | 2.37822100 | -2.61792700 |
| C | -6.70503000 | 1.57092600 | -2.45496300 |
| F | -7.14874400 | 0.47127100 | -3.07949600 |
| F | -6.96636300 | 2.61738600 | -3.22662400 |
| F | -7.42383700 | 1.70744900 | -1.32588300 |

### TS2-III

Value of imaginary frequency = -330.56 cm<sup>-1</sup>

|   |            |             |             |
|---|------------|-------------|-------------|
| P | 1.29581800 | 0.18015200  | 0.42013600  |
| O | 1.90806200 | 0.81988900  | -0.97666100 |
| O | 2.59935300 | 0.32966200  | 1.40518300  |
| O | 1.01437800 | -1.24789100 | 0.07798300  |
| C | 2.44564600 | 2.07936000  | -0.83804500 |
| C | 3.73039600 | 2.18841500  | -0.30547000 |
| C | 1.67415000 | 3.18248900  | -1.20575500 |
| C | 2.24062200 | 4.43752100  | -1.00542900 |
| C | 3.49927000 | 4.59832900  | -0.41707000 |
| H | 1.67209100 | 5.32058200  | -1.28914500 |
| C | 3.82332900 | 0.00209100  | 0.86754800  |
| C | 4.44667700 | 0.91164300  | 0.00567400  |
| C | 4.38400100 | -1.23522600 | 1.18673000  |
| C | 5.61211800 | -1.54563100 | 0.61050000  |
| C | 6.24446800 | -0.69071900 | -0.29560300 |
| H | 6.07188300 | -2.50282700 | 0.84630400  |
| C | 5.64738300 | 0.53665300  | -0.62802500 |
| C | 6.21487300 | 1.38404700  | -1.75364400 |
| C | 7.68397500 | 1.09243800  | -2.04616500 |
| H | 8.30598300 | 1.46469400  | -1.22114400 |
| C | 7.90101600 | -0.40921800 | -2.20344800 |
| H | 8.93139900 | -0.62966000 | -2.49823000 |
| C | 7.57082000 | -1.12032300 | -0.89401000 |
| H | 7.56938700 | -2.20641000 | -1.03419200 |
| H | 5.62103000 | 1.16915500  | -2.65440000 |
| C | 4.24700500 | 3.47089300  | -0.04065900 |
| C | 5.53563800 | 3.62640700  | 0.74579200  |
| C | 6.17486400 | 5.00254000  | 0.58339100  |
| H | 6.57784000 | 5.10693100  | -0.43298600 |
| C | 5.13603800 | 6.09264600  | 0.82950200  |
| H | 5.59445100 | 7.08591000  | 0.80653100  |
| C | 4.03141000 | 6.00561300  | -0.22041300 |
| H | 4.42582100 | 6.36570200  | -1.18060900 |
| H | 5.29270400 | 3.46736100  | 1.80602800  |
| H | 8.36632200 | -0.90825600 | -0.16654100 |



|   |             |             |             |
|---|-------------|-------------|-------------|
| H | 7.25098900  | -0.78316400 | -3.00501600 |
| H | 7.99366000  | 1.62974100  | -2.94760400 |
| H | 6.06727300  | 2.44801500  | -1.55828200 |
| H | 6.24609500  | 2.83670400  | 0.49028400  |
| H | 7.01814000  | 5.10188900  | 1.27347400  |
| H | 4.70671100  | 5.95902900  | 1.83043800  |
| H | 3.20255900  | 6.67321200  | 0.03702200  |
| O | 0.24311600  | 1.07192700  | 0.99855000  |
| C | 1.15977600  | 1.31815700  | -5.02456000 |
| C | 1.31590100  | 1.93592400  | -3.81809500 |
| C | 0.18402200  | 2.35944700  | -3.04606200 |
| C | -1.12296100 | 2.12537700  | -3.59378000 |
| C | -1.24435300 | 1.47969800  | -4.86562500 |
| C | -0.14064000 | 1.08593300  | -5.56175600 |
| C | 0.31320500  | 2.97391400  | -1.78173900 |
| C | -2.25108000 | 2.53409000  | -2.88262700 |
| C | -2.13836900 | 3.14721800  | -1.63595900 |
| C | -0.83670400 | 3.35305300  | -1.06007500 |
| C | -0.77028500 | 3.91081000  | 0.25920100  |
| H | 0.19849700  | 3.99587600  | 0.73724600  |
| C | -1.90157000 | 4.28867700  | 0.91872400  |
| C | -3.18966800 | 4.12747200  | 0.32531500  |
| C | -3.30124700 | 3.56054600  | -0.90769500 |
| H | 2.03282100  | 0.99891100  | -5.58447000 |
| H | 2.31203400  | 2.11158100  | -3.42599900 |
| H | -2.24301900 | 1.31150900  | -5.26004500 |
| H | -0.24338800 | 0.59655100  | -6.52511700 |
| H | -3.23806900 | 2.35648500  | -3.30308200 |
| H | -1.82849300 | 4.69836700  | 1.92130500  |
| H | -4.07682900 | 4.42079400  | 0.87907400  |
| H | -4.27680000 | 3.39809800  | -1.36152400 |
| C | 2.25212100  | -4.56565600 | -0.43300600 |
| C | 2.94980200  | -3.52335300 | 0.09710300  |
| C | 2.98766800  | -3.29505700 | 1.50997200  |
| C | 2.26773400  | -4.20131500 | 2.36125200  |
| C | 1.56101200  | -5.29683600 | 1.76771000  |
| C | 1.54960900  | -5.47173600 | 0.41645200  |
| C | 3.65006100  | -2.18701400 | 2.07274200  |
| C | 2.24360000  | -3.97881200 | 3.73730600  |
| C | 2.88099800  | -2.87551300 | 4.30521100  |
| C | 3.58840200  | -1.95379700 | 3.46084300  |
| C | 4.19417100  | -0.80880300 | 4.07273900  |
| H | 4.72743300  | -0.10371200 | 3.44388500  |
| C | 4.10200700  | -0.59757300 | 5.41728500  |

|   |             |             |             |
|---|-------------|-------------|-------------|
| C | 3.40209900  | -1.51700500 | 6.25283000  |
| C | 2.81364600  | -2.61969100 | 5.71102800  |
| H | 2.21873700  | -4.69537400 | -1.51112300 |
| H | 3.45641300  | -2.82375000 | -0.55585600 |
| H | 1.02884500  | -5.98060200 | 2.42397200  |
| H | 1.00253100  | -6.30077900 | -0.02180600 |
| H | 1.69442100  | -4.66379000 | 4.37951500  |
| H | 4.56380800  | 0.27929900  | 5.85965300  |
| H | 3.33846900  | -1.33000100 | 7.31989900  |
| H | 2.26935100  | -3.32308700 | 6.33501700  |
| H | -0.26177700 | -1.78036800 | -0.96369100 |
| C | -6.83994300 | -3.65878400 | -1.07971100 |
| C | -6.09217300 | -3.42744200 | -2.21404500 |
| C | -4.73284400 | -3.07286800 | -2.11730000 |
| C | -4.12149300 | -2.95454700 | -0.84947300 |
| C | -4.90203800 | -3.19492200 | 0.29683700  |
| C | -6.23405700 | -3.53922300 | 0.18110300  |
| H | -4.43688600 | -2.90741800 | -4.25762800 |
| H | -7.88839700 | -3.92396100 | -1.15760700 |
| H | -6.54324200 | -3.50446400 | -3.19939400 |
| C | -3.94839700 | -2.80698100 | -3.29168900 |
| C | -2.72014100 | -2.56046700 | -0.77887900 |
| H | -4.44521800 | -3.10144000 | 1.27674700  |
| H | -6.81935000 | -3.71446400 | 1.07797200  |
| C | -1.98040700 | -2.27278100 | -1.98103400 |
| C | -2.64505900 | -2.43940500 | -3.24657500 |
| H | -2.10378100 | -2.24806000 | -4.16444100 |
| C | -2.14126000 | -2.23515500 | 0.42151600  |
| C | -1.54029100 | -2.55144900 | 1.54026900  |
| C | -1.25797900 | -1.74301900 | 2.75289000  |
| C | 0.05139700  | -1.37997600 | 3.07695200  |
| C | -2.30498500 | -1.40854800 | 3.61474300  |
| C | 0.30077300  | -0.63874000 | 4.22798400  |
| H | 0.86501900  | -1.66219700 | 2.41586100  |
| C | -2.04755800 | -0.69277900 | 4.78035300  |
| H | -3.32120200 | -1.70028800 | 3.36491000  |
| C | -0.74657500 | -0.29723900 | 5.08087900  |
| H | 1.31976800  | -0.33550900 | 4.45171600  |
| H | -2.86691000 | -0.43377000 | 5.44382100  |
| H | -0.54688300 | 0.27163200  | 5.98351200  |
| N | -0.73899400 | -1.82319800 | -1.88327500 |
| C | 0.10578800  | -1.29004600 | -2.94523400 |
| H | -0.50499200 | -1.03828300 | -3.81358000 |
| H | 0.52613100  | -0.35380200 | -2.56554000 |

|   |             |             |             |
|---|-------------|-------------|-------------|
| C | 1.23625200  | -2.22347500 | -3.31617500 |
| C | 0.98838700  | -3.41102400 | -4.00785200 |
| C | 2.54556700  | -1.89814000 | -2.96293900 |
| C | 2.03629900  | -4.25630400 | -4.35711200 |
| H | -0.03239800 | -3.67720500 | -4.27340400 |
| C | 3.59644400  | -2.74373300 | -3.31365300 |
| H | 2.72896300  | -0.98674900 | -2.39753200 |
| C | 3.34513900  | -3.92123800 | -4.01197200 |
| H | 1.83416000  | -5.17487600 | -4.89884000 |
| H | 4.61201800  | -2.48451300 | -3.02862300 |
| H | 4.16410300  | -4.57966900 | -4.28345700 |
| H | -1.23491400 | -3.60296800 | 1.55854500  |
| C | -3.89368400 | 1.88989700  | 2.82921700  |
| C | -5.18397900 | 1.95026400  | 2.28599500  |
| C | -5.45129200 | 1.37760900  | 1.05814100  |
| C | -4.43429700 | 0.72719600  | 0.33998200  |
| C | -3.13768100 | 0.64192900  | 0.90479400  |
| C | -2.88536100 | 1.23907300  | 2.15293000  |
| H | -3.68926600 | 2.36280300  | 3.78501800  |
| H | -6.44950900 | 1.46442200  | 0.64672800  |
| H | -1.87213800 | 1.19749400  | 2.54358800  |
| N | -2.09440500 | -0.03307800 | 0.29242800  |
| H | -2.15279700 | 0.00376100  | -0.72327000 |
| H | -1.16563500 | 0.30731100  | 0.63651900  |
| C | -6.23322400 | 2.75248600  | 2.98871700  |
| F | -7.47090900 | 2.43188200  | 2.58787900  |
| F | -6.17881700 | 2.58806800  | 4.31905000  |
| F | -6.07764900 | 4.07137700  | 2.76107100  |
| C | -4.66803600 | 0.31502600  | -1.05404600 |
| O | -3.80654200 | 0.07360600  | -1.87500300 |
| C | -6.12666000 | 0.24795500  | -1.56437500 |
| F | -6.90447800 | -0.45044900 | -0.73260400 |
| F | -6.17729400 | -0.31449900 | -2.76404200 |
| F | -6.63886800 | 1.48740600  | -1.66748600 |

### TS2-III'

Value of imaginary frequency = -297.98 cm<sup>-1</sup>

|   |            |             |             |
|---|------------|-------------|-------------|
| P | 1.28076600 | 0.14668500  | -0.35421900 |
| O | 1.85588800 | -1.34634600 | 0.08429500  |
| O | 2.59138800 | 0.73910600  | -1.15908700 |
| O | 1.12212800 | 0.89071300  | 0.93294700  |
| C | 2.44141100 | -2.09821400 | -0.90851000 |
| C | 3.72935800 | -1.75803800 | -1.32535100 |
| C | 1.74670300 | -3.18305200 | -1.44293400 |

|   |             |             |             |
|---|-------------|-------------|-------------|
| C | 2.36047200  | -3.87829500 | -2.48232900 |
| C | 3.60298400  | -3.50431800 | -2.99845300 |
| H | 1.84045600  | -4.72923600 | -2.91710500 |
| C | 3.80070700  | 0.58051100  | -0.50924900 |
| C | 4.42060600  | -0.67118600 | -0.57124300 |
| C | 4.35831100  | 1.64234200  | 0.20808600  |
| C | 5.55521900  | 1.40300100  | 0.87742600  |
| C | 6.16916100  | 0.14986600  | 0.89208700  |
| H | 6.00438000  | 2.21967800  | 1.43826300  |
| C | 5.58941700  | -0.90958100 | 0.17834200  |
| C | 6.13638600  | -2.31987700 | 0.31987600  |
| C | 7.57756100  | -2.36173700 | 0.82087700  |
| H | 8.25327700  | -2.00735400 | 0.03103300  |
| C | 7.73555400  | -1.47576900 | 2.05240300  |
| H | 8.74040900  | -1.56523900 | 2.47590000  |
| C | 7.45292000  | -0.02302600 | 1.68065900  |
| H | 7.41381800  | 0.60531500  | 2.57661200  |
| H | 5.49271000  | -2.85011900 | 1.03729200  |
| C | 4.29720500  | -2.42862300 | -2.42395400 |
| C | 5.59245100  | -1.92768800 | -3.03604400 |
| C | 6.28162400  | -2.96851000 | -3.91406100 |
| H | 6.69106000  | -3.77133400 | -3.28613400 |
| C | 5.28310100  | -3.56164100 | -4.90361700 |
| H | 5.77860000  | -4.24092200 | -5.60377700 |
| C | 4.18314700  | -4.30408000 | -4.14969500 |
| H | 4.59600000  | -5.24061300 | -3.75036900 |
| H | 5.34770900  | -1.04768000 | -3.64756100 |
| H | 8.28870700  | 0.35731500  | 1.07749600  |
| H | 7.02976800  | -1.80563400 | 2.82580100  |
| H | 7.85934800  | -3.39560200 | 1.04195600  |
| H | 6.04328200  | -2.87462300 | -0.61591000 |
| H | 6.27221300  | -1.56301900 | -2.26207200 |
| H | 7.12625900  | -2.50956900 | -4.43663100 |
| H | 4.84272300  | -2.75123900 | -5.49805200 |
| H | 3.37678600  | -4.59369800 | -4.83152200 |
| O | 0.15694900  | -0.00746800 | -1.32846200 |
| C | 1.28596200  | -4.46990300 | 2.63156300  |
| C | 1.43496400  | -4.07762800 | 1.33387200  |
| C | 0.32768100  | -4.08438200 | 0.42239600  |
| C | -0.93047100 | -4.58579700 | 0.90315500  |
| C | -1.04043500 | -5.00664800 | 2.26735300  |
| C | 0.02650400  | -4.93599800 | 3.11178800  |
| C | 0.42595200  | -3.60688100 | -0.90231500 |
| C | -2.02277100 | -4.64638100 | 0.03742000  |

|   |             |             |             |
|---|-------------|-------------|-------------|
| C | -1.95113700 | -4.13358100 | -1.25785200 |
| C | -0.71761400 | -3.56673000 | -1.72594200 |
| C | -0.71313000 | -2.92714400 | -3.00851500 |
| H | 0.19267600  | -2.43089500 | -3.33724400 |
| C | -1.83947700 | -2.89150200 | -3.77586900 |
| C | -3.04959100 | -3.49743300 | -3.32731500 |
| C | -3.10343500 | -4.09748700 | -2.10600500 |
| H | 2.13266100  | -4.42759500 | 3.30885400  |
| H | 2.40179200  | -3.73456200 | 0.98299900  |
| H | -2.00128200 | -5.37842200 | 2.61359100  |
| H | -0.07103800 | -5.24474000 | 4.14758600  |
| H | -2.96372700 | -5.06482900 | 0.39186000  |
| H | -1.82308500 | -2.38182600 | -4.73359000 |
| H | -3.93350000 | -3.45723800 | -3.95576700 |
| H | -4.03104500 | -4.52347700 | -1.73263500 |
| C | 2.09637300  | 2.87008200  | 3.63193100  |
| C | 2.82640100  | 2.49340200  | 2.54574700  |
| C | 3.00817600  | 3.37356300  | 1.43085100  |
| C | 2.40408100  | 4.67544400  | 1.48909300  |
| C | 1.65035800  | 5.03847700  | 2.65210600  |
| C | 1.49962800  | 4.16522800  | 3.68798900  |
| C | 3.71254900  | 2.98542100  | 0.27464900  |
| C | 2.54471800  | 5.54753200  | 0.41004400  |
| C | 3.24602300  | 5.17677000  | -0.73685800 |
| C | 3.83668600  | 3.87017700  | -0.81399800 |
| C | 4.52360000  | 3.51006400  | -2.01907400 |
| H | 4.97681800  | 2.52667700  | -2.08626600 |
| C | 4.60574500  | 4.37834700  | -3.06806200 |
| C | 4.01058700  | 5.67185100  | -2.99094900 |
| C | 3.35588500  | 6.05594000  | -1.85969400 |
| H | 1.95452200  | 2.17023300  | 4.45090600  |
| H | 3.24355600  | 1.49567900  | 2.49270200  |
| H | 1.20181300  | 6.02786100  | 2.68571000  |
| H | 0.92271100  | 4.45100900  | 4.56227200  |
| H | 2.08099700  | 6.53047300  | 0.45448500  |
| H | 5.12695100  | 4.08468700  | -3.97362300 |
| H | 4.08183600  | 6.34567300  | -3.83862400 |
| H | 2.89199100  | 7.03601000  | -1.79133000 |
| H | -0.27722200 | 0.60076000  | 1.83368700  |
| C | -7.00457400 | 1.82474700  | 1.71166000  |
| C | -6.43822000 | 0.75755700  | 2.37448400  |
| C | -5.03774900 | 0.61778600  | 2.44069200  |
| C | -4.20103500 | 1.56524400  | 1.81278600  |
| C | -4.79944300 | 2.67100200  | 1.17539700  |

|   |             |             |             |
|---|-------------|-------------|-------------|
| C | -6.17229000 | 2.79412000  | 1.12463000  |
| H | -5.08298900 | -1.19223900 | 3.63532100  |
| H | -8.08263000 | 1.92266600  | 1.64619200  |
| H | -7.06122900 | -0.00079800 | 2.83984700  |
| C | -4.43001900 | -0.49088900 | 3.12299000  |
| C | -2.76169700 | 1.34162600  | 1.77906100  |
| H | -4.16806800 | 3.41132200  | 0.69484000  |
| H | -6.61456500 | 3.64252600  | 0.61148500  |
| C | -2.19573800 | 0.18832600  | 2.43151500  |
| C | -3.09078100 | -0.69078700 | 3.14802800  |
| H | -2.68586700 | -1.53577500 | 3.68961100  |
| C | -2.00793600 | 2.10498000  | 0.91308600  |
| C | -1.22180500 | 3.11737100  | 0.63610200  |
| C | -0.79505800 | 3.60349000  | -0.70409400 |
| C | 0.48948700  | 3.34982100  | -1.18002400 |
| C | -1.70616800 | 4.30673100  | -1.49929900 |
| C | 0.84998400  | 3.76516400  | -2.45944300 |
| H | 1.19567500  | 2.82010700  | -0.55069400 |
| C | -1.33751800 | 4.72884900  | -2.77258500 |
| H | -2.70822700 | 4.50342200  | -1.12972300 |
| C | -0.05969900 | 4.45408800  | -3.25496300 |
| H | 1.84833800  | 3.54401500  | -2.82537100 |
| H | -2.05342000 | 5.26518300  | -3.38696300 |
| H | 0.22704600  | 4.77823800  | -4.25034600 |
| N | -0.89560900 | -0.04213500 | 2.36588500  |
| C | -0.16718500 | -1.24293300 | 2.76429200  |
| H | -0.85450500 | -2.00399300 | 3.13716800  |
| H | 0.30824600  | -1.64970800 | 1.86577300  |
| C | 0.89854900  | -0.92724800 | 3.78994400  |
| C | 0.54881400  | -0.62597000 | 5.10724200  |
| C | 2.24279200  | -0.91232700 | 3.41734400  |
| C | 1.52970200  | -0.32497100 | 6.04661800  |
| H | -0.49986200 | -0.62492300 | 5.39692000  |
| C | 3.22623100  | -0.61092700 | 4.35750100  |
| H | 2.50674300  | -1.11828100 | 2.38254400  |
| C | 2.87268000  | -0.31846900 | 5.67201700  |
| H | 1.24877500  | -0.09622500 | 7.06979600  |
| H | 4.26960200  | -0.59393500 | 4.05547200  |
| H | 3.63931600  | -0.08220500 | 6.40311000  |
| H | -0.87434500 | 3.66571700  | 1.51764000  |
| C | -3.88044000 | -1.86166600 | 0.08011000  |
| C | -5.22959900 | -1.61973400 | -0.17691000 |
| C | -5.61691400 | -0.47925400 | -0.85820600 |
| C | -4.66454300 | 0.47722700  | -1.23342400 |

|   |             |             |             |
|---|-------------|-------------|-------------|
| C | -3.29562100 | 0.25632200  | -0.91838300 |
| C | -2.91957600 | -0.94930200 | -0.30761100 |
| H | -3.58145100 | -2.76464600 | 0.60024500  |
| H | -6.66751000 | -0.32708200 | -1.07177900 |
| H | -1.86130600 | -1.13338300 | -0.13387600 |
| N | -2.31947900 | 1.22428500  | -1.04641500 |
| H | -2.55468300 | 2.01019500  | -1.64527700 |
| H | -1.35696600 | 0.84792200  | -1.18258900 |
| C | -6.24484500 | -2.58537800 | 0.34485000  |
| F | -7.42977300 | -2.46023400 | -0.26341300 |
| F | -5.83967700 | -3.85959500 | 0.19304600  |
| F | -6.46129000 | -2.41661800 | 1.66516900  |
| C | -5.08670000 | 1.71585300  | -1.90324400 |
| O | -4.37901100 | 2.68066000  | -2.10899800 |
| C | -6.54153700 | 1.80627500  | -2.43231000 |
| F | -6.81572400 | 0.76916900  | -3.23341800 |
| F | -6.71326100 | 2.92471900  | -3.11993700 |
| F | -7.43401300 | 1.79362900  | -1.43020200 |

### IM3-III

|   |            |             |             |
|---|------------|-------------|-------------|
| P | 1.39952100 | -0.01652800 | -0.28242300 |
| O | 1.93560800 | -0.94707900 | 0.92810000  |
| O | 2.61302900 | -0.10778100 | -1.34398600 |
| O | 1.07836300 | 1.32168800  | 0.24506300  |
| C | 2.47553600 | -2.17790800 | 0.58287900  |
| C | 3.75985100 | -2.20889400 | 0.04016900  |
| C | 1.69868900 | -3.31647000 | 0.78554900  |
| C | 2.26792800 | -4.53104100 | 0.41104400  |
| C | 3.52507700 | -4.60953100 | -0.19338600 |
| H | 1.69529200 | -5.44299400 | 0.56394100  |
| C | 3.87429100 | 0.12274400  | -0.79802100 |
| C | 4.48787900 | -0.90970300 | -0.08623300 |
| C | 4.43970200 | 1.38775100  | -0.94424400 |
| C | 5.68275100 | 1.59159500  | -0.35339100 |
| C | 6.31350000 | 0.60740800  | 0.41133200  |
| H | 6.15118900 | 2.56776000  | -0.45389800 |
| C | 5.70272000 | -0.64617200 | 0.57730300  |
| C | 6.27005800 | -1.65154900 | 1.56443200  |
| C | 7.74506800 | -1.42010500 | 1.88030800  |
| H | 8.35611800 | -1.68173700 | 1.00620600  |
| C | 7.98225700 | 0.04256800  | 2.24227800  |
| H | 9.01730500 | 0.20791100  | 2.55528200  |
| C | 7.65204100 | 0.93136000  | 1.04657500  |
| H | 7.66853200 | 1.98768300  | 1.33344500  |

|   |             |             |             |
|---|-------------|-------------|-------------|
| H | 5.68681500  | -1.56027600 | 2.49240500  |
| C | 4.27240600  | -3.44030500 | -0.41064000 |
| C | 5.55515800  | -3.48581000 | -1.22078600 |
| C | 6.19532100  | -4.87082800 | -1.25187900 |
| H | 6.60422000  | -5.11298200 | -0.26179000 |
| C | 5.15597600  | -5.91802200 | -1.64062900 |
| H | 5.61472500  | -6.90464100 | -1.75374600 |
| C | 4.05529400  | -5.97583400 | -0.58494400 |
| H | 4.45212000  | -6.46256200 | 0.31635300  |
| H | 5.30230300  | -3.18576800 | -2.24765800 |
| H | 8.43512900  | 0.80899100  | 0.28596300  |
| H | 7.34237800  | 0.31138600  | 3.09259200  |
| H | 8.05374900  | -2.08120600 | 2.69540100  |
| H | 6.10819300  | -2.67536200 | 1.22163100  |
| H | 6.26823200  | -2.73763700 | -0.86770900 |
| H | 7.03464100  | -4.87250500 | -1.95349300 |
| H | 4.72341400  | -5.65082500 | -2.61292000 |
| H | 3.22461300  | -6.60129000 | -0.92750000 |
| O | 0.26177200  | -0.77872400 | -1.02646200 |
| C | 0.96442200  | -1.74894400 | 4.72066000  |
| C | 1.19928600  | -2.28846200 | 3.49021200  |
| C | 0.12059400  | -2.71564700 | 2.64847200  |
| C | -1.21336900 | -2.60702600 | 3.16793000  |
| C | -1.41808300 | -2.04227600 | 4.46612800  |
| C | -0.36521400 | -1.61540400 | 5.21770600  |
| C | 0.32014000  | -3.20544300 | 1.33982400  |
| C | -2.29099400 | -3.02737000 | 2.38946700  |
| C | -2.11028500 | -3.48264400 | 1.08529200  |
| C | -0.78445700 | -3.55170900 | 0.53475100  |
| C | -0.65355300 | -3.92099000 | -0.84505200 |
| H | 0.33265200  | -3.91983500 | -1.29464900 |
| C | -1.74747000 | -4.22824800 | -1.59803400 |
| C | -3.05853400 | -4.19907200 | -1.03631200 |
| C | -3.22929500 | -3.83594900 | 0.26504800  |
| H | 1.79698600  | -1.40993200 | 5.32855100  |
| H | 2.21808500  | -2.38683300 | 3.13095700  |
| H | -2.43856600 | -1.94627300 | 4.82626100  |
| H | -0.52988000 | -1.17358800 | 6.19507100  |
| H | -3.29881200 | -2.95212000 | 2.79214600  |
| H | -1.62453200 | -4.48698100 | -2.64496600 |
| H | -3.91602700 | -4.43973100 | -1.65625100 |
| H | -4.22262500 | -3.78173500 | 0.70518800  |
| C | 2.36445000  | 4.41255800  | 1.24700800  |
| C | 3.05926400  | 3.47750600  | 0.54226800  |



|   |             |            |             |
|---|-------------|------------|-------------|
| C | 3.04159200  | 3.46451000 | -0.89018000 |
| C | 2.27560600  | 4.47488500 | -1.56640900 |
| C | 1.56883400  | 5.44699600 | -0.78908900 |
| C | 1.60796100  | 5.41558900 | 0.57137500  |
| C | 3.69307000  | 2.47141400 | -1.64632500 |
| C | 2.20859200  | 4.47013400 | -2.95900700 |
| C | 2.85377700  | 3.49261000 | -3.71644000 |
| C | 3.60350600  | 2.46488400 | -3.05111500 |
| C | 4.22200900  | 1.45313700 | -3.85539600 |
| H | 4.79512800  | 0.67340100 | -3.36429600 |
| C | 4.09765000  | 1.46085400 | -5.21407500 |
| C | 3.34984600  | 2.48157500 | -5.87122700 |
| C | 2.75144500  | 3.46510900 | -5.14262600 |
| H | 2.37021400  | 4.37960000 | 2.33226600  |
| H | 3.60229600  | 2.70172800 | 1.07033800  |
| H | 0.99051100  | 6.20208900 | -1.31443400 |
| H | 1.05557900  | 6.14797400 | 1.15138900  |
| H | 1.62088300  | 5.23201800 | -3.46619500 |
| H | 4.57180400  | 0.68345300 | -5.80465600 |
| H | 3.25921100  | 2.46767100 | -6.95250400 |
| H | 2.17071900  | 4.24305900 | -5.63036100 |
| H | -0.43189100 | 2.12123300 | 1.15357500  |
| C | -7.17562000 | 3.10512200 | 0.71476100  |
| C | -6.48283500 | 3.10463200 | 1.89713700  |
| C | -5.08770600 | 2.85671100 | 1.92677900  |
| C | -4.37832300 | 2.62967700 | 0.70952200  |
| C | -5.13627100 | 2.60699000 | -0.49721400 |
| C | -6.48854000 | 2.83751300 | -0.49118000 |
| H | -4.91817600 | 2.97096500 | 4.07853900  |
| H | -8.24401400 | 3.29192400 | 0.70131200  |
| H | -6.99408900 | 3.28574100 | 2.83902300  |
| C | -4.37323300 | 2.80488000 | 3.15315900  |
| C | -2.97396900 | 2.36665000 | 0.76015800  |
| H | -4.62879400 | 2.39549500 | -1.43258300 |
| H | -7.03857900 | 2.81180000 | -1.42676300 |
| C | -2.30234400 | 2.33204800 | 1.98264800  |
| C | -3.03250000 | 2.56053500 | 3.18645800  |
| H | -2.50504800 | 2.54342600 | 4.13426100  |
| C | -2.25248300 | 1.86080200 | -0.44060300 |
| C | -1.98267900 | 2.59786400 | -1.52130100 |
| C | -1.38949100 | 2.11859000 | -2.79348000 |
| C | -0.04937900 | 1.73297200 | -2.87063900 |
| C | -2.19374100 | 2.02337900 | -3.93590000 |
| C | 0.46061800  | 1.19404500 | -4.05024700 |

|   |             |             |             |
|---|-------------|-------------|-------------|
| H | 0.59397900  | 1.87970400  | -2.00740200 |
| C | -1.68057000 | 1.49882600  | -5.11700300 |
| H | -3.23304700 | 2.33798900  | -3.88566900 |
| C | -0.35554600 | 1.06799800  | -5.17044300 |
| H | 1.50040100  | 0.88125600  | -4.08779400 |
| H | -2.31589400 | 1.42068600  | -5.99384600 |
| H | 0.04593500  | 0.65138900  | -6.08887700 |
| N | -0.95557000 | 2.06711000  | 2.02241600  |
| C | -0.29696600 | 1.25431400  | 3.03238900  |
| H | -1.02179800 | 1.00591300  | 3.81304300  |
| H | 0.02248600  | 0.29754000  | 2.59266200  |
| C | 0.91435400  | 1.93762400  | 3.62997100  |
| C | 0.76747500  | 3.08430100  | 4.41368400  |
| C | 2.19542200  | 1.44121700  | 3.39129000  |
| C | 1.87722400  | 3.71009100  | 4.97140700  |
| H | -0.22691300 | 3.49260400  | 4.57874500  |
| C | 3.31136300  | 2.07122400  | 3.94101200  |
| H | 2.31221600  | 0.56288900  | 2.76129500  |
| C | 3.15530800  | 3.20289300  | 4.73598900  |
| H | 1.74873300  | 4.59598800  | 5.58569100  |
| H | 4.30430800  | 1.67818700  | 3.74000000  |
| H | 4.02321300  | 3.69261800  | 5.16628200  |
| H | -2.29348200 | 3.64014000  | -1.46985700 |
| C | -3.91755700 | -1.39395400 | -2.94607700 |
| C | -5.09381400 | -1.69227600 | -2.26402500 |
| C | -5.23514900 | -1.36207600 | -0.92535900 |
| C | -4.20237800 | -0.70372700 | -0.24769000 |
| C | -3.03236800 | -0.35605800 | -0.95479900 |
| C | -2.89184300 | -0.72787100 | -2.29073800 |
| H | -3.80554600 | -1.67617000 | -3.98794700 |
| H | -6.14897200 | -1.63553400 | -0.41182900 |
| H | -1.96714500 | -0.48961200 | -2.80621700 |
| N | -1.96258500 | 0.41436400  | -0.37016400 |
| H | -1.91118300 | 0.18043500  | 0.62499700  |
| H | -0.62421000 | -0.26127700 | -0.87340700 |
| C | -6.17321900 | -2.46584600 | -2.96278600 |
| F | -7.36581400 | -2.30391100 | -2.37730900 |
| F | -6.29059300 | -2.09839000 | -4.24549700 |
| F | -5.91262100 | -3.78674500 | -2.96273100 |
| C | -4.30829300 | -0.49580700 | 1.22140900  |
| O | -3.37079400 | -0.35622600 | 1.97245100  |
| C | -5.70658800 | -0.59192100 | 1.86960200  |
| F | -6.63966100 | 0.04705100  | 1.16505600  |
| F | -5.68975200 | -0.10842400 | 3.10109400  |

|   |             |             |            |
|---|-------------|-------------|------------|
| F | -6.06028500 | -1.89311600 | 1.93726400 |
|---|-------------|-------------|------------|

**IM3-III'**

|   |             |             |             |
|---|-------------|-------------|-------------|
| P | -1.19123200 | 0.07199500  | -0.22456600 |
| O | -1.32656500 | 1.41202900  | 0.67325000  |
| O | -2.60156800 | 0.00973600  | -1.01248900 |
| O | -0.88614200 | -1.07115600 | 0.65362800  |
| C | -1.91253500 | 2.51698800  | 0.06732900  |
| C | -3.29618200 | 2.51125500  | -0.10330200 |
| C | -1.10266300 | 3.56869800  | -0.35455200 |
| C | -1.73951700 | 4.63358400  | -0.98692300 |
| C | -3.11355500 | 4.64528600  | -1.23383100 |
| H | -1.13330500 | 5.47210100  | -1.32167400 |
| C | -3.72115900 | 0.07850700  | -0.18435000 |
| C | -4.05890600 | 1.31558000  | 0.36400900  |
| C | -4.45262000 | -1.08289000 | 0.06512700  |
| C | -5.49853400 | -0.97998600 | 0.97714900  |
| C | -5.79518200 | 0.21244600  | 1.64329100  |
| H | -6.08591800 | -1.86952400 | 1.19284900  |
| C | -5.07266700 | 1.37588000  | 1.33971000  |
| C | -5.29841400 | 2.65657500  | 2.12247600  |
| C | -6.64577700 | 2.69232800  | 2.83845000  |
| H | -7.45326900 | 2.80905400  | 2.10339500  |
| C | -6.85864000 | 1.39952700  | 3.62028300  |
| H | -7.77534300 | 1.44566400  | 4.21525900  |
| C | -6.92257100 | 0.21678500  | 2.65792100  |
| H | -6.91585800 | -0.73022000 | 3.20765900  |
| H | -4.49373900 | 2.73120900  | 2.86781500  |
| C | -3.90543700 | 3.56775200  | -0.80749400 |
| C | -5.36781800 | 3.48113000  | -1.20684700 |
| C | -5.96618600 | 4.82973000  | -1.59806000 |
| H | -6.07971000 | 5.45687800  | -0.70385900 |
| C | -5.05969500 | 5.53813700  | -2.59955300 |
| H | -5.51726100 | 6.46525700  | -2.95691000 |
| C | -3.71133400 | 5.83975900  | -1.95189000 |
| H | -3.83953200 | 6.65309900  | -1.22476500 |
| H | -5.43168400 | 2.79705700  | -2.06551900 |
| H | -7.87780800 | 0.24830100  | 2.11660800  |
| H | -6.02601700 | 1.26227000  | 4.32214400  |
| H | -6.68760700 | 3.56251900  | 3.49992400  |
| H | -5.17986700 | 3.53171100  | 1.47907100  |
| H | -5.96330300 | 3.01442600  | -0.41935200 |
| H | -6.96757600 | 4.67989800  | -2.01218800 |
| H | -4.91451300 | 4.89204800  | -3.47442500 |

|   |             |             |             |
|---|-------------|-------------|-------------|
| H | -2.99765100 | 6.20637300  | -2.69661000 |
| O | -0.20000200 | 0.40930400  | -1.38437400 |
| C | 0.52824700  | 4.23792600  | 3.54414500  |
| C | 0.01277800  | 4.00206800  | 2.30378600  |
| C | 0.86758900  | 3.86166600  | 1.16332400  |
| C | 2.28134200  | 4.00782800  | 1.36019600  |
| C | 2.78169800  | 4.26910100  | 2.67461000  |
| C | 1.93381200  | 4.37122600  | 3.73675400  |
| C | 0.37138000  | 3.58487900  | -0.12737100 |
| C | 3.14637100  | 3.86048100  | 0.27497100  |
| C | 2.67074800  | 3.52216100  | -0.98907900 |
| C | 1.25695900  | 3.37826900  | -1.20163100 |
| C | 0.81082300  | 2.98023700  | -2.50597000 |
| H | -0.25096700 | 2.83554600  | -2.67114100 |
| C | 1.70170800  | 2.72709700  | -3.50572500 |
| C | 3.10512200  | 2.88453600  | -3.29378800 |
| C | 3.57038400  | 3.28068200  | -2.07715600 |
| H | -0.13691800 | 4.32701700  | 4.39696200  |
| H | -1.05959600 | 3.90716800  | 2.17055300  |
| H | 3.85456600  | 4.37300800  | 2.80484100  |
| H | 2.32353700  | 4.55872200  | 4.73199400  |
| H | 4.21614400  | 3.97310200  | 0.42999500  |
| H | 1.34397700  | 2.39168200  | -4.47359800 |
| H | 3.79702800  | 2.67679300  | -4.10423600 |
| H | 4.63592700  | 3.39648100  | -1.89754100 |
| C | -2.35166100 | -4.34045500 | 1.91248200  |
| C | -3.02279800 | -3.31171700 | 1.32253800  |
| C | -3.49160800 | -3.41130400 | -0.02449300 |
| C | -3.22716400 | -4.62428600 | -0.74870700 |
| C | -2.51925400 | -5.68169500 | -0.09425700 |
| C | -2.09560600 | -5.54526000 | 1.19301900  |
| C | -4.16252200 | -2.35222700 | -0.66327300 |
| C | -3.63775200 | -4.73325000 | -2.07638000 |
| C | -4.30233200 | -3.68967500 | -2.72035500 |
| C | -4.57725200 | -2.47508700 | -2.00422600 |
| C | -5.25610600 | -1.42226500 | -2.70119600 |
| H | -5.48331400 | -0.50372900 | -2.17048400 |
| C | -5.61318500 | -1.56070000 | -4.01036600 |
| C | -5.32309800 | -2.76131900 | -4.72231300 |
| C | -4.69214900 | -3.79148700 | -4.09281900 |
| H | -2.00036400 | -4.23726400 | 2.93376200  |
| H | -3.19059500 | -2.39019200 | 1.86527700  |
| H | -2.32413500 | -6.59252700 | -0.65351100 |
| H | -1.55375200 | -6.35037200 | 1.67868700  |

|   |             |             |             |
|---|-------------|-------------|-------------|
| H | -3.42298100 | -5.64599700 | -2.62736600 |
| H | -6.12311600 | -0.74938500 | -4.51976300 |
| H | -5.60901900 | -2.84828400 | -5.76534100 |
| H | -4.46441800 | -4.71156000 | -4.62357900 |
| H | 0.30055700  | -2.47405900 | 1.32647300  |
| C | 6.84721500  | -3.31959600 | -0.38083800 |
| C | 6.37759300  | -3.44489700 | 0.90234500  |
| C | 4.99789700  | -3.31151200 | 1.19103000  |
| C | 4.07662600  | -3.05369500 | 0.14053400  |
| C | 4.58870100  | -2.98236200 | -1.18361900 |
| C | 5.93478000  | -3.09514900 | -1.43490500 |
| H | 5.18576200  | -3.65215500 | 3.32207200  |
| H | 7.90824600  | -3.40249200 | -0.59013600 |
| H | 7.06189400  | -3.63588700 | 1.72475900  |
| C | 4.49568400  | -3.41698500 | 2.51636200  |
| C | 2.69466200  | -2.80938800 | 0.43748000  |
| H | 3.90238100  | -2.83937800 | -2.01164700 |
| H | 6.29769100  | -3.01477500 | -2.45581700 |
| C | 2.24011500  | -2.89357500 | 1.74900900  |
| C | 3.17075300  | -3.24368800 | 2.77815900  |
| H | 2.79731800  | -3.36625600 | 3.78948400  |
| C | 1.86052900  | -2.28565100 | -0.68575700 |
| C | 0.93863800  | -2.99280500 | -1.35150600 |
| C | 0.27214100  | -2.50147300 | -2.58393600 |
| C | -1.11135100 | -2.31447400 | -2.64008900 |
| C | 1.04301400  | -2.17150100 | -3.70624200 |
| C | -1.70325300 | -1.77049200 | -3.77699700 |
| H | -1.71657400 | -2.55228500 | -1.76977700 |
| C | 0.45112900  | -1.63923800 | -4.84615800 |
| H | 2.11777400  | -2.34336700 | -3.69241300 |
| C | -0.92449900 | -1.43137600 | -4.87930200 |
| H | -2.77413400 | -1.59567300 | -3.79376800 |
| H | 1.06623600  | -1.38652700 | -5.70397100 |
| H | -1.39058800 | -1.00511800 | -5.76193200 |
| N | 0.92191800  | -2.65417000 | 2.11113800  |
| C | 0.62786100  | -1.73631200 | 3.21362300  |
| H | 1.50566900  | -1.67607700 | 3.86320000  |
| H | 0.43778600  | -0.72490000 | 2.82923000  |
| C | -0.57619100 | -2.15698000 | 4.02126700  |
| C | -0.50098000 | -3.23587200 | 4.90540400  |
| C | -1.78541300 | -1.47803200 | 3.88062100  |
| C | -1.61547400 | -3.63029200 | 5.63702600  |
| H | 0.43750200  | -3.77549800 | 5.00809900  |
| C | -2.90715300 | -1.87553800 | 4.60694200  |

|   |             |             |             |
|---|-------------|-------------|-------------|
| H | -1.84840500 | -0.65242200 | 3.17462000  |
| C | -2.82457200 | -2.95132300 | 5.48503300  |
| H | -1.54586700 | -4.46890000 | 6.32270300  |
| H | -3.84772400 | -1.34768900 | 4.47621200  |
| H | -3.69743800 | -3.26259300 | 6.04986200  |
| H | 0.69986500  | -3.98689800 | -0.98163900 |
| C | 3.34188600  | 0.81946200  | 1.85715600  |
| C | 4.61969600  | 1.23192800  | 1.48000200  |
| C | 5.07770500  | 1.00936300  | 0.19194400  |
| C | 4.28810100  | 0.31965500  | -0.73818900 |
| C | 3.01594400  | -0.14868000 | -0.33625700 |
| C | 2.54789600  | 0.14461700  | 0.94721500  |
| H | 2.96968300  | 1.04189300  | 2.85153000  |
| H | 6.06206500  | 1.37152400  | -0.08335300 |
| H | 1.54966800  | -0.19298000 | 1.20943300  |
| N | 2.19958000  | -0.94736300 | -1.15823400 |
| H | 2.51229900  | -0.93374600 | -2.12567100 |
| H | 0.66608400  | -0.09614200 | -1.34414600 |
| C | 5.51973000  | 1.94954400  | 2.44057000  |
| F | 6.68449200  | 1.30706500  | 2.60259700  |
| F | 5.83584000  | 3.18738200  | 2.00079300  |
| F | 4.96276700  | 2.09195200  | 3.64850800  |
| C | 4.78393000  | 0.06412700  | -2.10313300 |
| O | 4.11974100  | -0.35196800 | -3.02980800 |
| C | 6.27145500  | 0.36520900  | -2.40882600 |
| F | 6.48414700  | 1.69328400  | -2.38471500 |
| F | 6.59822300  | -0.08443600 | -3.61073700 |
| F | 7.08933100  | -0.19344800 | -1.51218200 |

#### IM4c

|   |             |            |             |
|---|-------------|------------|-------------|
| C | -4.64107900 | 4.68076100 | -0.01115400 |
| C | -5.14394600 | 3.58148800 | -0.65610100 |
| C | -4.35071900 | 2.42339700 | -0.85049000 |
| C | -3.01302200 | 2.38687100 | -0.36134200 |
| C | -2.51819600 | 3.55034400 | 0.29429600  |
| C | -3.30923300 | 4.65841400 | 0.46155200  |
| H | -5.88380500 | 1.30717600 | -1.88600600 |
| H | -5.25395900 | 5.56408300 | 0.13308800  |
| H | -6.16283800 | 3.57868000 | -1.03443900 |
| C | -4.85828900 | 1.28527300 | -1.52722300 |
| C | -2.22614100 | 1.21028600 | -0.56400800 |
| H | -1.49944300 | 3.55561800 | 0.66511300  |
| H | -2.90451200 | 5.53197700 | 0.96312900  |
| C | -2.75008600 | 0.11663300 | -1.25747400 |

|   |             |             |             |
|---|-------------|-------------|-------------|
| C | -4.09486500 | 0.17233700  | -1.72873400 |
| H | -4.52141900 | -0.68893400 | -2.22904600 |
| C | -0.82804000 | 1.14088400  | -0.04770000 |
| C | -0.58644100 | 1.16371800  | 1.27946500  |
| H | -1.48061400 | 1.09864400  | 1.89381300  |
| C | 0.67030000  | 1.30992000  | 2.02098100  |
| C | 0.76433300  | 0.75021600  | 3.30539900  |
| C | 1.75383100  | 2.06458700  | 1.54561300  |
| C | 1.90028500  | 0.93095900  | 4.08377400  |
| H | -0.06924700 | 0.16640800  | 3.68563900  |
| C | 2.89074800  | 2.24377300  | 2.32494700  |
| H | 1.68833800  | 2.53956200  | 0.57120000  |
| C | 2.96835900  | 1.67939400  | 3.59537200  |
| H | 1.95304400  | 0.48509300  | 5.07166700  |
| H | 3.71550800  | 2.83540500  | 1.94092300  |
| H | 3.85695100  | 1.82210200  | 4.20140700  |
| N | -1.97534500 | -0.99981100 | -1.49392700 |
| C | -2.55771900 | -2.27891700 | -1.84045100 |
| H | -1.71947200 | -2.96760700 | -1.98897100 |
| H | -3.06696800 | -2.21200300 | -2.80915600 |
| H | -1.13760600 | -1.06531500 | -0.92820300 |
| N | 0.11260700  | 1.09187500  | -1.09219600 |
| C | 1.40812900  | 0.64552600  | -1.23951600 |
| C | 2.12693100  | 1.23345400  | -2.30856900 |
| C | 2.08073200  | -0.31208700 | -0.43980900 |
| C | 3.44571900  | 0.93520100  | -2.54805700 |
| H | 1.61787000  | 1.96298900  | -2.93148800 |
| C | 3.44294200  | -0.57602900 | -0.68272100 |
| C | 4.12016600  | 0.03225400  | -1.71464600 |
| H | 3.97031400  | 1.40956800  | -3.37147200 |
| H | 3.96792400  | -1.29928000 | -0.07094200 |
| C | 1.38156400  | -1.16493900 | 0.53254900  |
| O | 0.20785200  | -1.46792600 | 0.47893300  |
| C | 2.21174600  | -1.81827300 | 1.66225500  |
| F | 1.42386100  | -2.19524900 | 2.65971300  |
| F | 3.15226100  | -1.00236600 | 2.14166800  |
| F | 2.83093600  | -2.91331000 | 1.18527700  |
| H | -0.25824100 | 1.50384000  | -1.93886700 |
| C | -3.50647500 | -2.85609400 | -0.80258800 |
| C | -4.61178700 | -3.60873100 | -1.19731700 |
| C | -3.26954900 | -2.65880600 | 0.55891600  |
| C | -5.46569000 | -4.16599000 | -0.24951200 |
| H | -4.80787500 | -3.75702700 | -2.25704900 |
| C | -4.12279400 | -3.21356300 | 1.50682500  |

|   |             |             |             |
|---|-------------|-------------|-------------|
| H | -2.41322300 | -2.06683200 | 0.87299800  |
| C | -5.22226100 | -3.96876900 | 1.10605000  |
| H | -6.32480500 | -4.74659000 | -0.57047200 |
| H | -3.92986300 | -3.05404600 | 2.56302200  |
| H | -5.88891100 | -4.39739800 | 1.84738700  |
| C | 5.56864900  | -0.24752600 | -1.97001800 |
| F | 6.32289200  | 0.84716600  | -1.77939900 |
| F | 6.04644400  | -1.20845400 | -1.16913100 |
| F | 5.77700500  | -0.63478300 | -3.23871300 |

**IM5c**

|   |             |             |             |
|---|-------------|-------------|-------------|
| P | -0.94888300 | -0.66682200 | 0.27696300  |
| O | -0.61359100 | -1.88714900 | -0.72188600 |
| O | -2.54243800 | -0.75838000 | 0.50279700  |
| O | -0.40699700 | 0.59040400  | -0.25822000 |
| C | -1.11280400 | -3.13185000 | -0.35571200 |
| C | -2.47350600 | -3.36650300 | -0.52759600 |
| C | -0.24154100 | -4.07423200 | 0.18569900  |
| C | -0.80134700 | -5.29049700 | 0.57004700  |
| C | -2.17018600 | -5.54689400 | 0.48546300  |
| H | -0.14573400 | -6.05095000 | 0.98774600  |
| C | -3.39182700 | -1.04543500 | -0.56200800 |
| C | -3.31993600 | -2.30946600 | -1.15617300 |
| C | -4.34686300 | -0.09694500 | -0.94249100 |
| C | -5.15170100 | -0.43527600 | -2.03182200 |
| C | -4.99988300 | -1.61659800 | -2.75466700 |
| H | -5.91638100 | 0.27293300  | -2.34086300 |
| C | -4.06942300 | -2.56928800 | -2.32143700 |
| C | -3.82022500 | -3.82635300 | -3.13574500 |
| C | -4.97273100 | -4.17012400 | -4.07571700 |
| H | -5.83632100 | -4.51684300 | -3.49205400 |
| C | -5.37162700 | -2.94276300 | -4.88906500 |
| H | -6.13428200 | -3.19332000 | -5.63207100 |
| C | -5.89228200 | -1.85137800 | -3.95822300 |
| H | -6.02082900 | -0.90927400 | -4.50089600 |
| H | -2.91199700 | -3.65510300 | -3.73101900 |
| C | -3.02747900 | -4.57147200 | -0.04475600 |
| C | -4.53283900 | -4.76930100 | 0.00118400  |
| C | -4.94543900 | -6.23138400 | 0.14829700  |
| H | -4.73880100 | -6.76911400 | -0.78681800 |
| C | -4.17374400 | -6.88621500 | 1.28894800  |
| H | -4.52067700 | -7.90877600 | 1.46350600  |
| C | -2.68296900 | -6.89136000 | 0.96494400  |
| H | -2.49162100 | -7.63418800 | 0.17874100  |



|   |             |             |             |
|---|-------------|-------------|-------------|
| H | -4.91040000 | -4.20110100 | 0.86363500  |
| H | -6.89041000 | -2.13490800 | -3.59792300 |
| H | -4.49566500 | -2.57548600 | -5.43822900 |
| H | -4.67795800 | -4.99572800 | -4.72999600 |
| H | -3.58809500 | -4.67452700 | -2.48863400 |
| H | -5.01609800 | -4.32587200 | -0.87089700 |
| H | -6.02434400 | -6.29088600 | 0.31859200  |
| H | -4.35087200 | -6.32343000 | 2.21402400  |
| H | -2.09866800 | -7.21033600 | 1.83397800  |
| O | -0.51001200 | -1.11998000 | 1.72877200  |
| H | 0.43596200  | -0.93893800 | 1.89092000  |
| C | 2.44957800  | -3.38412700 | -3.11606400 |
| C | 1.59011800  | -3.56410600 | -2.07342100 |
| C | 2.07135300  | -3.66313500 | -0.72760800 |
| C | 3.49181900  | -3.61320700 | -0.51924700 |
| C | 4.36018000  | -3.44107200 | -1.64359000 |
| C | 3.85707800  | -3.31365000 | -2.90200900 |
| C | 1.21470100  | -3.82955300 | 0.38099700  |
| C | 4.00373100  | -3.74289000 | 0.77245100  |
| C | 3.16598400  | -3.87788900 | 1.88028700  |
| C | 1.74268200  | -3.88267800 | 1.68958300  |
| C | 0.91093600  | -3.93400700 | 2.85777200  |
| H | -0.16444100 | -3.86808100 | 2.73630200  |
| C | 1.45620200  | -4.03432400 | 4.10354700  |
| C | 2.86895400  | -4.10371000 | 4.28063800  |
| C | 3.69539500  | -4.01820500 | 3.20274800  |
| H | 2.06022900  | -3.29461800 | -4.12484300 |
| H | 0.52349800  | -3.62272500 | -2.25727000 |
| H | 5.43228400  | -3.40496500 | -1.46768700 |
| H | 4.52622700  | -3.15926300 | -3.74176500 |
| H | 5.08235100  | -3.75492300 | 0.91819500  |
| H | 0.80875800  | -4.05914900 | 4.97395100  |
| H | 3.27955200  | -4.20345400 | 5.27993200  |
| H | 4.77464000  | -4.03637000 | 3.32390500  |
| C | -4.45988700 | 3.60678500  | -3.07857700 |
| C | -4.26053500 | 2.47377700  | -2.34637400 |
| C | -4.68938400 | 2.38339600  | -0.98011200 |
| C | -5.22769600 | 3.57106100  | -0.37723700 |
| C | -5.43770800 | 4.73588800  | -1.18387000 |
| C | -5.09177000 | 4.74738000  | -2.50123200 |
| C | -4.61844300 | 1.18627100  | -0.23085300 |
| C | -5.57094200 | 3.56030100  | 0.97282100  |
| C | -5.45547300 | 2.40304800  | 1.74102500  |
| C | -5.00054000 | 1.18293500  | 1.13098500  |

|   |             |             |             |
|---|-------------|-------------|-------------|
| C | -5.01603100 | -0.00095200 | 1.94055300  |
| H | -4.72150400 | -0.94705700 | 1.50432300  |
| C | -5.40686900 | 0.03648700  | 3.24664800  |
| C | -5.82798700 | 1.25600500  | 3.85209200  |
| C | -5.85317600 | 2.40075700  | 3.11583000  |
| H | -4.11716400 | 3.64997400  | -4.10727600 |
| H | -3.75752500 | 1.62450000  | -2.79382000 |
| H | -5.88428500 | 5.60886300  | -0.71598300 |
| H | -5.26706400 | 5.63037000  | -3.10794000 |
| H | -5.96495700 | 4.46452900  | 1.43066200  |
| H | -5.40652200 | -0.87677500 | 3.83267600  |
| H | -6.13574600 | 1.26231100  | 4.89286000  |
| H | -6.18125500 | 3.33962700  | 3.55312700  |
| C | -0.59159100 | 5.60625300  | -4.30497800 |
| C | -1.43572200 | 5.45118200  | -3.23634700 |
| C | -1.00722800 | 4.79625700  | -2.05479500 |
| C | 0.32404500  | 4.30136800  | -1.96106600 |
| C | 1.17339600  | 4.47507700  | -3.09060000 |
| C | 0.72767600  | 5.10399100  | -4.22494700 |
| H | -2.89142500 | 5.00098500  | -1.02157000 |
| H | -0.92746300 | 6.10834200  | -5.20634700 |
| H | -2.45501200 | 5.82792900  | -3.27114300 |
| C | -1.87910000 | 4.61701900  | -0.95261400 |
| C | 0.74487000  | 3.65385300  | -0.76247500 |
| H | 2.19213200  | 4.10609300  | -3.04391700 |
| H | 1.39700700  | 5.21862800  | -5.07217900 |
| C | -0.14016700 | 3.48770700  | 0.29955900  |
| C | -1.47199200 | 3.97741000  | 0.18170300  |
| H | -2.16179300 | 3.86191100  | 1.01112200  |
| C | 2.15324000  | 3.18605400  | -0.60473800 |
| C | 3.14986600  | 4.09123200  | -0.49057900 |
| H | 2.85983800  | 5.12241200  | -0.67404400 |
| C | 4.56289700  | 3.85435400  | -0.14857600 |
| C | 5.58260500  | 4.48036400  | -0.87452800 |
| C | 4.92250300  | 3.00295000  | 0.90444100  |
| C | 6.92037600  | 4.22968600  | -0.58529200 |
| H | 5.31772200  | 5.15476500  | -1.68483800 |
| C | 6.25694300  | 2.74670200  | 1.19166400  |
| H | 4.13946900  | 2.53894800  | 1.49714400  |
| C | 7.26228200  | 3.35322500  | 0.44068700  |
| H | 7.69772900  | 4.71549500  | -1.16674000 |
| H | 6.50904500  | 2.07116400  | 2.00317800  |
| H | 8.30537600  | 3.15010500  | 0.66012800  |
| N | 0.26165000  | 2.89451500  | 1.48970300  |

|   |             |             |             |
|---|-------------|-------------|-------------|
| C | -0.71952000 | 2.26469200  | 2.35345000  |
| H | -0.21042500 | 1.45349900  | 2.88610900  |
| H | -1.51663400 | 1.79178400  | 1.76183400  |
| H | 1.12214700  | 2.37204600  | 1.41968400  |
| N | 2.30235700  | 1.79158700  | -0.49406200 |
| C | 3.44898300  | 1.09218600  | -0.84320800 |
| C | 4.21842900  | 1.50311200  | -1.94741100 |
| C | 3.93713700  | 0.01458300  | -0.05823900 |
| C | 5.38171500  | 0.85126300  | -2.29142300 |
| H | 3.86615500  | 2.34456600  | -2.53234300 |
| C | 5.14035300  | -0.61856400 | -0.40223300 |
| C | 5.84192700  | -0.22282500 | -1.52012200 |
| H | 5.94294500  | 1.16630600  | -3.16551300 |
| H | 5.51016800  | -1.43772800 | 0.19940200  |
| C | 3.21403000  | -0.35842000 | 1.15619100  |
| O | 2.00354800  | -0.29053900 | 1.26253600  |
| C | 3.99136200  | -0.60795100 | 2.47217600  |
| F | 4.46898900  | 0.57696800  | 2.88914600  |
| F | 5.03489100  | -1.43604900 | 2.36243700  |
| F | 3.17530000  | -1.07559200 | 3.40425700  |
| H | 1.44219600  | 1.25318400  | -0.36513900 |
| C | -1.34547400 | 3.19788400  | 3.37155600  |
| C | -2.55449000 | 2.83756100  | 3.96932800  |
| C | -0.73661400 | 4.39766600  | 3.73505500  |
| C | -3.13618900 | 3.65580500  | 4.93187200  |
| H | -3.04576000 | 1.91222100  | 3.67307700  |
| C | -1.32193000 | 5.21938900  | 4.69480600  |
| H | 0.19180100  | 4.67960700  | 3.24821100  |
| C | -2.51995200 | 4.84989400  | 5.29912200  |
| H | -4.07688300 | 3.36117900  | 5.38752100  |
| H | -0.84174000 | 6.15389600  | 4.96876600  |
| H | -2.97556400 | 5.49188500  | 6.04647900  |
| C | 7.05094400  | -0.98330400 | -1.96524000 |
| F | 8.05621500  | -0.16976400 | -2.31318900 |
| F | 7.50600300  | -1.81243500 | -1.01175700 |
| F | 6.78515900  | -1.74544700 | -3.04431500 |

### TS3c

Value of imaginary frequency = -230.88 cm<sup>-1</sup>

|   |             |             |             |
|---|-------------|-------------|-------------|
| P | -1.25928200 | -0.01058300 | -0.28736700 |
| O | -2.45403900 | -1.04637900 | -0.59921000 |
| O | -2.06239500 | 1.35177200  | 0.05201700  |
| O | -0.33105500 | 0.06739100  | -1.42552000 |
| C | -3.58117700 | -0.99963200 | 0.21366500  |

|   |             |             |             |
|---|-------------|-------------|-------------|
| C | -4.47833200 | 0.05773400  | 0.05628400  |
| C | -3.75901400 | -2.01253800 | 1.15394800  |
| C | -4.88568900 | -1.92641000 | 1.96531800  |
| C | -5.77543700 | -0.85173100 | 1.89171500  |
| H | -5.05476100 | -2.70706000 | 2.70331600  |
| C | -2.95369500 | 1.71917200  | -0.95481700 |
| C | -4.18639800 | 1.07001800  | -1.00303900 |
| C | -2.55640700 | 2.67568900  | -1.88778100 |
| C | -3.46210200 | 2.97400800  | -2.90097400 |
| C | -4.68638900 | 2.31084800  | -3.02424800 |
| H | -3.18970300 | 3.72701800  | -3.63689000 |
| C | -5.04848700 | 1.33106900  | -2.08617700 |
| C | -6.28577300 | 0.47865700  | -2.30275100 |
| C | -7.30975900 | 1.13142500  | -3.22717200 |
| H | -7.77580200 | 1.98626600  | -2.71918800 |
| C | -6.63039600 | 1.61150400  | -4.50607800 |
| H | -7.36281500 | 2.00459400  | -5.21715400 |
| C | -5.60026500 | 2.68778700  | -4.17446800 |
| H | -4.99382700 | 2.92628200  | -5.05412400 |
| H | -5.95334900 | -0.46966000 | -2.74858900 |
| C | -5.56289100 | 0.16627400  | 0.94875200  |
| C | -6.41241000 | 1.42460400  | 0.97133400  |
| C | -7.75964500 | 1.22761600  | 1.66107800  |
| H | -8.40602500 | 0.59530400  | 1.03783700  |
| C | -7.56023900 | 0.56334600  | 3.01998900  |
| H | -8.50564100 | 0.49298100  | 3.56585400  |
| C | -6.96290100 | -0.82870800 | 2.83477700  |
| H | -7.73630500 | -1.49704600 | 2.43238900  |
| H | -5.84223500 | 2.19247000  | 1.51366100  |
| H | -6.12682400 | 3.61392700  | -3.90659900 |
| H | -6.13502600 | 0.76106200  | -4.99098300 |
| H | -8.10874000 | 0.41881800  | -3.45177000 |
| H | -6.74577700 | 0.20553000  | -1.35083200 |
| H | -6.55055300 | 1.82381200  | -0.03571300 |
| H | -8.26298600 | 2.19314500  | 1.76671100  |
| H | -6.88385700 | 1.17947600  | 3.62558500  |
| H | -6.66600100 | -1.25293000 | 3.79929200  |
| O | -0.69061700 | -0.35369100 | 1.13103600  |
| H | 0.24849900  | -0.69504300 | 1.21617200  |
| C | -3.60592200 | -5.16363400 | -1.72791100 |
| C | -3.66097700 | -4.17006700 | -0.79625900 |
| C | -2.73517900 | -4.13016400 | 0.29570800  |
| C | -1.74789400 | -5.16846900 | 0.38312500  |
| C | -1.72700900 | -6.19409800 | -0.61392700 |

|   |             |             |             |
|---|-------------|-------------|-------------|
| C | -2.62347000 | -6.19188200 | -1.63896900 |
| C | -2.76017900 | -3.11334400 | 1.26944900  |
| C | -0.82029500 | -5.14741700 | 1.42540900  |
| C | -0.83187100 | -4.13990900 | 2.38964900  |
| C | -1.82336000 | -3.10200900 | 2.31959900  |
| C | -1.77981800 | -2.06059600 | 3.30414500  |
| H | -2.50323200 | -1.25510500 | 3.24349000  |
| C | -0.82194400 | -2.04881100 | 4.27308000  |
| C | 0.15729700  | -3.08294800 | 4.34145200  |
| C | 0.14600300  | -4.09689000 | 3.43331500  |
| H | -4.31533400 | -5.17410400 | -2.54920200 |
| H | -4.41445400 | -3.39313100 | -0.87223700 |
| H | -0.96643800 | -6.96516600 | -0.54213600 |
| H | -2.59084300 | -6.96950400 | -2.39508900 |
| H | -0.06399200 | -5.92700900 | 1.47829200  |
| H | -0.78819200 | -1.23476700 | 4.98986600  |
| H | 0.92160500  | -3.04714300 | 5.11082700  |
| H | 0.89662500  | -4.88173900 | 3.46690100  |
| C | 0.79722900  | 1.56830600  | -4.35604200 |
| C | -0.27675500 | 1.94559500  | -3.60508700 |
| C | -0.15581000 | 2.96326600  | -2.60275600 |
| C | 1.12847800  | 3.58487300  | -2.42824600 |
| C | 2.23975800  | 3.13594900  | -3.21371700 |
| C | 2.08125500  | 2.15777200  | -4.14887700 |
| C | -1.22680900 | 3.34260500  | -1.77026400 |
| C | 1.28304100  | 4.59549300  | -1.48154200 |
| C | 0.22184500  | 4.99558900  | -0.67016000 |
| C | -1.05068500 | 4.34328800  | -0.79485100 |
| C | -2.10124100 | 4.74177300  | 0.09532900  |
| H | -3.06823000 | 4.25690800  | 0.01440500  |
| C | -1.90107100 | 5.71309400  | 1.03172000  |
| C | -0.63930900 | 6.36873600  | 1.14393300  |
| C | 0.38516200  | 6.02123200  | 0.31470700  |
| H | 0.68023000  | 0.79916800  | -5.11361000 |
| H | -1.23532300 | 1.45702600  | -3.73795900 |
| H | 3.21102100  | 3.59127200  | -3.03791100 |
| H | 2.92777100  | 1.82338500  | -4.74048800 |
| H | 2.25841200  | 5.06065800  | -1.35542500 |
| H | -2.70966300 | 5.99663700  | 1.69769800  |
| H | -0.50271300 | 7.14523800  | 1.88972200  |
| H | 1.35417300  | 6.50690100  | 0.38962500  |
| C | 6.84232200  | 4.35277400  | -1.06258100 |
| C | 5.91923600  | 4.86196000  | -0.18527500 |
| C | 4.77988700  | 4.11030000  | 0.18891900  |

|   |             |             |             |
|---|-------------|-------------|-------------|
| C | 4.58513300  | 2.80016600  | -0.32650300 |
| C | 5.55053500  | 2.30911500  | -1.24908000 |
| C | 6.64315400  | 3.06380100  | -1.60129900 |
| H | 3.97494100  | 5.61081100  | 1.52608300  |
| H | 7.71110200  | 4.93509000  | -1.34984500 |
| H | 6.04160700  | 5.85740400  | 0.23336500  |
| C | 3.80436100  | 4.63420300  | 1.07953200  |
| C | 3.40927800  | 2.05493400  | 0.03488200  |
| H | 5.42058900  | 1.33027700  | -1.69765700 |
| H | 7.35938100  | 2.66081800  | -2.31029700 |
| C | 2.41208500  | 2.65170100  | 0.81786600  |
| C | 2.66834400  | 3.94695500  | 1.37625000  |
| H | 1.94551200  | 4.37541500  | 2.05847000  |
| C | 3.37848000  | 0.63159500  | -0.37845800 |
| C | 4.37323500  | -0.23609100 | 0.12511100  |
| H | 4.92267000  | 0.21894100  | 0.94424800  |
| C | 5.21955400  | -1.13451700 | -0.69288200 |
| C | 5.05275400  | -1.33371800 | -2.07220600 |
| C | 6.33820500  | -1.72425400 | -0.08160500 |
| C | 5.93751300  | -2.13038900 | -2.79290800 |
| H | 4.24691000  | -0.83620100 | -2.60095300 |
| C | 7.21929200  | -2.51755400 | -0.80086300 |
| H | 6.50263700  | -1.55799000 | 0.97926800  |
| C | 7.01808700  | -2.73587900 | -2.16237000 |
| H | 5.78132400  | -2.26742900 | -3.85832700 |
| H | 8.07025800  | -2.96492100 | -0.29701600 |
| H | 7.70505500  | -3.35789200 | -2.72641200 |
| N | 1.21405600  | 2.04210900  | 1.07495100  |
| C | 0.24594900  | 2.57657200  | 2.01722300  |
| H | -0.65624600 | 1.97078500  | 1.90835500  |
| H | -0.03163800 | 3.59097800  | 1.71022500  |
| H | 1.20280400  | 1.03937800  | 0.95945300  |
| N | 2.38265100  | 0.17854600  | -1.15674300 |
| C | 2.12475100  | -1.20726400 | -1.34094400 |
| C | 1.65411400  | -1.68404300 | -2.55632900 |
| C | 2.35869300  | -2.08432000 | -0.27615000 |
| C | 1.43313200  | -3.04650000 | -2.71992400 |
| H | 1.44785000  | -0.97866500 | -3.35407500 |
| C | 2.13050100  | -3.44273300 | -0.43909100 |
| C | 1.68771300  | -3.92153600 | -1.67043100 |
| H | 1.06190600  | -3.43017200 | -3.66383700 |
| H | 2.29257300  | -4.12870600 | 0.38558200  |
| C | 2.70851500  | -1.49334200 | 1.05531300  |
| O | 1.83411200  | -0.81709000 | 1.64291500  |

|   |             |             |             |
|---|-------------|-------------|-------------|
| C | 3.64086400  | -2.27446100 | 1.99168200  |
| F | 4.45864500  | -3.10611200 | 1.34391700  |
| F | 2.88117900  | -3.02996000 | 2.80182700  |
| F | 4.37200500  | -1.47087900 | 2.76578600  |
| H | 1.65504300  | 0.81304500  | -1.48773200 |
| C | 0.67982600  | 2.57876600  | 3.47160000  |
| C | 0.25717100  | 3.60864200  | 4.31302700  |
| C | 1.46191600  | 1.54773000  | 3.99582200  |
| C | 0.59903500  | 3.60881700  | 5.66219500  |
| H | -0.34321700 | 4.41752300  | 3.90061200  |
| C | 1.80438300  | 1.54955400  | 5.34502200  |
| H | 1.80096700  | 0.74198100  | 3.34926400  |
| C | 1.37438900  | 2.57640900  | 6.18181400  |
| H | 0.26614700  | 4.41778400  | 6.30511400  |
| H | 2.41308500  | 0.74339100  | 5.74334700  |
| H | 1.64664200  | 2.57486100  | 7.23251400  |
| C | 1.55681100  | -5.39881400 | -1.89346700 |
| F | 0.53442900  | -5.69488700 | -2.70642400 |
| F | 2.66092200  | -5.91234000 | -2.45909800 |
| F | 1.36981300  | -6.06656900 | -0.74088600 |

**IM6c**

|   |            |             |             |
|---|------------|-------------|-------------|
| P | 1.37341900 | 0.03338600  | -0.23925200 |
| O | 2.36962700 | 1.22325400  | -0.66405100 |
| O | 2.36631000 | -1.04336100 | 0.42966900  |
| O | 0.89522800 | -0.52238900 | -1.61003000 |
| C | 3.24807800 | 1.62888000  | 0.34047900  |
| C | 4.37547600 | 0.84418000  | 0.58353300  |
| C | 2.94033900 | 2.76944400  | 1.07607000  |
| C | 3.83493700 | 3.12033300  | 2.08469900  |
| C | 4.95250600 | 2.34436900  | 2.39648800  |
| H | 3.62728900 | 4.01208200  | 2.67140800  |
| C | 3.54117500 | -1.32369000 | -0.26440400 |
| C | 4.56981800 | -0.38162500 | -0.24541300 |
| C | 3.62861100 | -2.53107800 | -0.95269300 |
| C | 4.80426600 | -2.76426700 | -1.66071000 |
| C | 5.83001000 | -1.81918500 | -1.73499100 |
| H | 4.90539500 | -3.70197500 | -2.20227200 |
| C | 5.70880100 | -0.60370300 | -1.04353500 |
| C | 6.72999500 | 0.50134400  | -1.24488300 |
| C | 8.07547000 | -0.01119300 | -1.75115400 |
| H | 8.58154900 | -0.57382100 | -0.95521700 |
| C | 7.86810300 | -0.91898900 | -2.95980200 |
| H | 8.82571300 | -1.22603400 | -3.39035000 |

|   |             |             |             |
|---|-------------|-------------|-------------|
| C | 7.06321500  | -2.15047000 | -2.55350200 |
| H | 6.76687900  | -2.72653700 | -3.43600900 |
| H | 6.31262300  | 1.19955200  | -1.98440200 |
| C | 5.21557200  | 1.17549000  | 1.66432400  |
| C | 6.30666400  | 0.21918500  | 2.11311100  |
| C | 7.36831100  | 0.88530000  | 2.98392200  |
| H | 7.97557200  | 1.56556800  | 2.37198100  |
| C | 6.70582100  | 1.67237200  | 4.10998600  |
| H | 7.45298600  | 2.08567100  | 4.79381300  |
| C | 5.85765200  | 2.79846600  | 3.52576500  |
| H | 6.52381700  | 3.58182300  | 3.13942600  |
| H | 5.82077800  | -0.58070900 | 2.69031500  |
| H | 7.70431200  | -2.81389000 | -1.95719600 |
| H | 7.32884400  | -0.36371100 | -3.73747400 |
| H | 8.72021300  | 0.83582800  | -2.00331700 |
| H | 6.85852500  | 1.08831300  | -0.33302900 |
| H | 6.76956200  | -0.28029500 | 1.25997300  |
| H | 8.04535500  | 0.12436600  | 3.38311800  |
| H | 6.07144700  | 0.99622700  | 4.69674800  |
| H | 5.25203900  | 3.27125400  | 4.30553800  |
| O | 0.32844800  | 0.40900300  | 0.74654400  |
| H | -1.21909300 | 1.27099200  | 1.12386500  |
| C | 2.41288300  | 5.03388900  | -2.53186600 |
| C | 2.57156500  | 4.30104100  | -1.39323600 |
| C | 1.58143600  | 4.31793400  | -0.35811700 |
| C | 0.42723500  | 5.15012600  | -0.54527000 |
| C | 0.30990800  | 5.92073600  | -1.74456800 |
| C | 1.26455800  | 5.85794000  | -2.71425100 |
| C | 1.70335100  | 3.56016800  | 0.82317900  |
| C | -0.55880000 | 5.19335700  | 0.44068100  |
| C | -0.46458800 | 4.42037800  | 1.59716100  |
| C | 0.67711900  | 3.56983800  | 1.78906600  |
| C | 0.70177500  | 2.73340600  | 2.95380800  |
| H | 1.52863600  | 2.04411900  | 3.08429400  |
| C | -0.30979700 | 2.77323300  | 3.86699900  |
| C | -1.41609700 | 3.65574600  | 3.69653800  |
| C | -1.48877900 | 4.45033500  | 2.59493600  |
| H | 3.17098200  | 4.99624800  | -3.30759000 |
| H | 3.45641100  | 3.68729500  | -1.26353100 |
| H | -0.56061200 | 6.55729600  | -1.86229400 |
| H | 1.15825200  | 6.43983900  | -3.62427000 |
| H | -1.42669200 | 5.83193000  | 0.29495300  |
| H | -0.28175500 | 2.11751500  | 4.73176400  |
| H | -2.20996500 | 3.66925000  | 4.43606800  |



|   |             |             |             |
|---|-------------|-------------|-------------|
| H | -2.33929600 | 5.10690800  | 2.43636000  |
| C | 1.19686200  | -3.17899400 | -4.41856500 |
| C | 1.97005700  | -2.97158700 | -3.31547700 |
| C | 1.74278500  | -3.70816100 | -2.10670200 |
| C | 0.66776500  | -4.66008300 | -2.09112400 |
| C | -0.11928000 | -4.84711800 | -3.27070000 |
| C | 0.13647900  | -4.13179500 | -4.40029400 |
| C | 2.49948800  | -3.50155900 | -0.93713100 |
| C | 0.38903200  | -5.36412300 | -0.92103900 |
| C | 1.11208400  | -5.14369600 | 0.25025800  |
| C | 2.18611500  | -4.19232000 | 0.25031500  |
| C | 2.89867700  | -3.98561300 | 1.47646100  |
| H | 3.72101000  | -3.27824700 | 1.49266600  |
| C | 2.55855900  | -4.65861600 | 2.61197900  |
| C | 1.48650000  | -5.59961300 | 2.60923400  |
| C | 0.79185300  | -5.83491500 | 1.46137900  |
| H | 1.37817200  | -2.60115800 | -5.31931600 |
| H | 2.75178000  | -2.22066100 | -3.33120000 |
| H | -0.94411000 | -5.55330800 | -3.23114900 |
| H | -0.47783600 | -4.26947200 | -5.28442200 |
| H | -0.42773900 | -6.08165800 | -0.91794400 |
| H | 3.10958600  | -4.48196900 | 3.53011300  |
| H | 1.23435700  | -6.12845800 | 3.52299000  |
| H | -0.02682900 | -6.54940800 | 1.44029000  |
| C | -3.75350100 | -5.07515600 | -3.13237000 |
| C | -3.46066600 | -5.46028400 | -1.84802900 |
| C | -2.92307800 | -4.53899800 | -0.91591200 |
| C | -2.67507200 | -3.19403400 | -1.31371700 |
| C | -2.98445200 | -2.82716600 | -2.65125200 |
| C | -3.50751900 | -3.74227100 | -3.53050400 |
| H | -2.86381900 | -5.94112600 | 0.72804100  |
| H | -4.17001500 | -5.78538600 | -3.83886200 |
| H | -3.64567900 | -6.48015100 | -1.51955600 |
| C | -2.64542400 | -4.91958300 | 0.42510300  |
| C | -2.18912600 | -2.27101100 | -0.33619600 |
| H | -2.78444300 | -1.81376700 | -2.98105300 |
| H | -3.73065600 | -3.43740000 | -4.54824200 |
| C | -1.83066300 | -2.70208200 | 0.94489300  |
| C | -2.10306600 | -4.04970200 | 1.32558200  |
| H | -1.88062000 | -4.37668500 | 2.33420700  |
| C | -2.32238200 | -0.81276200 | -0.55023500 |
| C | -3.42676800 | -0.15860700 | 0.25952800  |
| H | -3.41988300 | -0.62587900 | 1.24678700  |
| C | -4.76326900 | -0.48399300 | -0.39462500 |

|   |             |             |             |
|---|-------------|-------------|-------------|
| C | -5.02111100 | -0.20925800 | -1.74005700 |
| C | -5.75465200 | -1.09278500 | 0.37614800  |
| C | -6.25164600 | -0.53418700 | -2.30005900 |
| H | -4.26063100 | 0.26060600  | -2.35761600 |
| C | -6.98468500 | -1.41907100 | -0.18533500 |
| H | -5.55439200 | -1.31147800 | 1.42174900  |
| C | -7.23617700 | -1.13973300 | -1.52473100 |
| H | -6.43908300 | -0.31715700 | -3.34663400 |
| H | -7.74489700 | -1.89571400 | 0.42492600  |
| H | -8.19418000 | -1.39655500 | -1.96495900 |
| N | -1.23964800 | -1.81733700 | 1.80335900  |
| C | -1.00686200 | -2.06894000 | 3.20935200  |
| H | -0.31147500 | -1.29251800 | 3.54257200  |
| H | -0.50134800 | -3.03169000 | 3.36413000  |
| H | -0.76835000 | -1.01018200 | 1.40954900  |
| N | -1.63523200 | -0.17096100 | -1.42887600 |
| C | -1.88732100 | 1.20504800  | -1.66006200 |
| C | -1.32901300 | 1.76338500  | -2.80979800 |
| C | -2.67219300 | 1.98733800  | -0.79447600 |
| C | -1.60970200 | 3.07975000  | -3.15119100 |
| H | -0.69577600 | 1.14362900  | -3.43600800 |
| C | -2.94253400 | 3.30552900  | -1.14047700 |
| C | -2.43864200 | 3.83319000  | -2.32797500 |
| H | -1.19354500 | 3.51862400  | -4.05054300 |
| H | -3.55369800 | 3.92940800  | -0.49779800 |
| C | -3.10368500 | 1.33359600  | 0.50495600  |
| O | -2.10848000 | 1.44024000  | 1.49139200  |
| C | -4.31589000 | 2.01967800  | 1.14523400  |
| F | -5.32128800 | 2.18941900  | 0.28028500  |
| F | -4.00515100 | 3.22899700  | 1.62951500  |
| F | -4.77598700 | 1.28879300  | 2.17295400  |
| H | -0.14097600 | -0.54685600 | -1.67835700 |
| C | -2.28529200 | -1.99937900 | 4.02194100  |
| C | -2.69637000 | -3.05759400 | 4.82755400  |
| C | -3.08170000 | -0.85159300 | 3.94124300  |
| C | -3.89085400 | -2.98036900 | 5.54298700  |
| H | -2.07949500 | -3.95131900 | 4.89495300  |
| C | -4.27552400 | -0.77581700 | 4.64942300  |
| H | -2.75672000 | -0.01787400 | 3.32067500  |
| C | -4.68363000 | -1.84220700 | 5.45103600  |
| H | -4.20352800 | -3.81371500 | 6.16426600  |
| H | -4.88655200 | 0.11818600  | 4.57398200  |
| H | -5.61710500 | -1.78359400 | 6.00167900  |
| C | -2.87516400 | 5.20692200  | -2.74346000 |

|   |             |            |             |
|---|-------------|------------|-------------|
| F | -2.08140000 | 5.73351700 | -3.68590500 |
| F | -4.12098000 | 5.19470700 | -3.24120700 |
| F | -2.89330900 | 6.06606000 | -1.70521800 |

**IM7c**

|   |             |             |             |
|---|-------------|-------------|-------------|
| H | 1.50049100  | -1.99276500 | -2.00505700 |
| C | -3.38147100 | 4.93029000  | 0.62058800  |
| C | -4.20483400 | 4.04349900  | -0.02247700 |
| C | -3.69100700 | 2.84549300  | -0.57759400 |
| C | -2.30180000 | 2.55551100  | -0.47245700 |
| C | -1.47454300 | 3.49394900  | 0.20292900  |
| C | -2.00195100 | 4.64454600  | 0.73156400  |
| H | -5.59469800 | 2.13732500  | -1.31687300 |
| H | -3.78146800 | 5.84592100  | 1.04311200  |
| H | -5.26905800 | 4.24283700  | -0.11671300 |
| C | -4.53410100 | 1.91416400  | -1.23792200 |
| C | -1.80825800 | 1.32539200  | -1.00735800 |
| H | -0.41214200 | 3.29809600  | 0.28527900  |
| H | -1.34933800 | 5.34647900  | 1.24114600  |
| C | -2.65245800 | 0.45460600  | -1.69326600 |
| C | -4.04094500 | 0.76506900  | -1.78320700 |
| H | -4.70571500 | 0.09263500  | -2.31187700 |
| C | -0.39523500 | 0.92195900  | -0.80117300 |
| C | -0.18000000 | -0.28716400 | 0.10443400  |
| H | -1.01308700 | -0.97814800 | -0.05002600 |
| C | -0.21624500 | 0.13530100  | 1.56609500  |
| C | 0.58586600  | 1.16495700  | 2.06565700  |
| C | -1.08884500 | -0.52727400 | 2.43107100  |
| C | 0.51973200  | 1.51670200  | 3.40935300  |
| H | 1.26646100  | 1.69691100  | 1.40721200  |
| C | -1.15599000 | -0.17207600 | 3.77443500  |
| H | -1.72010500 | -1.32327400 | 2.04344900  |
| C | -0.35023900 | 0.84921400  | 4.26685600  |
| H | 1.14758500  | 2.31774500  | 3.78552400  |
| H | -1.84208200 | -0.69281200 | 4.43438100  |
| H | -0.40250600 | 1.12831900  | 5.31416100  |
| N | -2.15032900 | -0.65546900 | -2.35039900 |
| C | -2.92717600 | -1.86999300 | -2.54901400 |
| H | -2.31189400 | -2.53044100 | -3.16650800 |
| H | -3.82500900 | -1.64904100 | -3.13499400 |
| H | -1.15177400 | -0.80863000 | -2.28084400 |
| N | 0.55981900  | 1.60469300  | -1.31311500 |
| C | 1.88688000  | 1.19799500  | -1.07696100 |
| C | 2.89038900  | 2.12400700  | -1.36468500 |

|   |             |             |             |
|---|-------------|-------------|-------------|
| C | 2.22976800  | -0.07026400 | -0.56958400 |
| C | 4.22456300  | 1.80749700  | -1.14970100 |
| H | 2.58996100  | 3.09119300  | -1.75195900 |
| C | 3.56843400  | -0.38672100 | -0.36549400 |
| C | 4.55732400  | 0.55282300  | -0.65035900 |
| H | 5.00553400  | 2.52941400  | -1.36140600 |
| H | 3.86087200  | -1.35072900 | 0.03542500  |
| C | 1.08175300  | -1.03535200 | -0.34762300 |
| O | 0.70442300  | -1.65419800 | -1.57398300 |
| C | 1.43536600  | -2.16748900 | 0.62273200  |
| F | 0.35007400  | -2.87530100 | 0.95861400  |
| F | 2.00923400  | -1.73314700 | 1.74296400  |
| F | 2.29358200  | -3.02508100 | 0.03197100  |
| C | -3.30202100 | -2.57334900 | -1.25922300 |
| C | -4.61082700 | -2.57387600 | -0.78023400 |
| C | -2.30391900 | -3.19488900 | -0.50301900 |
| C | -4.91982900 | -3.17842400 | 0.43666600  |
| H | -5.39666900 | -2.09976900 | -1.36256200 |
| C | -2.60771200 | -3.79743400 | 0.71325200  |
| H | -1.27991800 | -3.19588400 | -0.87017400 |
| C | -3.91944300 | -3.78790900 | 1.18634800  |
| H | -5.94267200 | -3.16983300 | 0.79926000  |
| H | -1.82070800 | -4.27356200 | 1.28959600  |
| H | -4.15951400 | -4.25782800 | 2.13462300  |
| C | 5.99788100  | 0.17172200  | -0.46884000 |
| F | 6.77562300  | 1.24576200  | -0.27542700 |
| F | 6.16513200  | -0.64741000 | 0.57958400  |
| F | 6.47868900  | -0.47260500 | -1.54420000 |

#### IM2-IV

|   |            |             |             |
|---|------------|-------------|-------------|
| P | 1.27919000 | -0.12950200 | 0.05065800  |
| O | 2.65803000 | -0.94597400 | 0.43209600  |
| O | 1.86242200 | 0.96647700  | -1.02493800 |
| O | 0.84489900 | 0.53750800  | 1.32245300  |
| C | 3.38020500 | -1.41034900 | -0.64727200 |
| C | 4.18453800 | -0.50778100 | -1.34997700 |
| C | 3.27062800 | -2.75442700 | -1.00907700 |
| C | 4.01694300 | -3.18222300 | -2.10329700 |
| C | 4.80044900 | -2.30698700 | -2.85740800 |
| H | 3.95897200 | -4.22839300 | -2.39603200 |
| C | 3.03748900 | 1.60658000  | -0.69605000 |
| C | 4.24239700 | 0.90279200  | -0.85957800 |
| C | 2.98927300 | 2.91934800  | -0.22727300 |
| C | 4.20763500 | 3.53786000  | 0.07427500  |

|   |             |             |             |
|---|-------------|-------------|-------------|
| C | 5.41410400  | 2.85845400  | -0.02917700 |
| H | 4.19708200  | 4.56681400  | 0.42545800  |
| C | 5.43750700  | 1.52831700  | -0.47770300 |
| C | 6.77839500  | 0.83495500  | -0.41583600 |
| C | 7.93374000  | 1.67114300  | -1.01278000 |
| H | 8.04838300  | 1.44042600  | -2.07686400 |
| C | 7.73350600  | 3.18967600  | -0.83444400 |
| H | 7.33161000  | 3.62086800  | -1.75727600 |
| C | 6.73990700  | 3.49864700  | 0.29385500  |
| H | 7.13178700  | 3.10541900  | 1.24259400  |
| H | 6.99251900  | 0.66822000  | 0.64838900  |
| C | 4.86524500  | -0.95067800 | -2.50114100 |
| C | 5.57048900  | 0.04210200  | -3.40638300 |
| C | 6.61430000  | -0.60677500 | -4.31032200 |
| H | 7.46603200  | -0.94894900 | -3.70660300 |
| C | 6.00179800  | -1.79725900 | -5.04215600 |
| H | 6.70685600  | -2.22392500 | -5.76182800 |
| C | 5.57837500  | -2.86335100 | -4.03532600 |
| H | 6.47747400  | -3.36317700 | -3.64957000 |
| H | 4.80256700  | 0.51879100  | -4.03244000 |
| H | 6.61929500  | 4.57796100  | 0.42378600  |
| H | 8.69254300  | 3.68071800  | -0.64651500 |
| H | 8.86376000  | 1.35445300  | -0.53115800 |
| H | 6.74239800  | -0.15584500 | -0.87314100 |
| H | 6.01394300  | 0.85224400  | -2.82648400 |
| H | 7.00013400  | 0.13275600  | -5.01867900 |
| H | 5.12782600  | -1.45605300 | -5.61109300 |
| H | 4.98505200  | -3.64224100 | -4.52552600 |
| O | 0.34729100  | -1.00766500 | -0.71540500 |
| C | 4.14786500  | -4.04360900 | 2.98744300  |
| C | 3.86565300  | -3.63452700 | 1.71816400  |
| C | 2.68276400  | -4.08250300 | 1.04435600  |
| C | 1.80636100  | -4.97886800 | 1.74621900  |
| C | 2.13345300  | -5.37229600 | 3.08276800  |
| C | 3.26836300  | -4.92338800 | 3.68495500  |
| C | 2.36435600  | -3.67937100 | -0.26917100 |
| C | 0.65024800  | -5.44141500 | 1.11786400  |
| C | 0.32595700  | -5.05533200 | -0.18277000 |
| C | 1.19116400  | -4.15355200 | -0.89224600 |
| C | 0.79607300  | -3.73830600 | -2.20651300 |
| H | 1.41259200  | -3.01685500 | -2.73015400 |
| C | -0.34928600 | -4.20715000 | -2.77933100 |
| C | -1.19863700 | -5.11472700 | -2.07842100 |
| C | -0.86758100 | -5.52288300 | -0.82126600 |

|   |             |             |             |
|---|-------------|-------------|-------------|
| H | 5.04975500  | -3.69308000 | 3.47935300  |
| H | 4.53933300  | -2.96259600 | 1.19731200  |
| H | 1.44838400  | -6.03311400 | 3.60638400  |
| H | 3.50341600  | -5.22110600 | 4.70161500  |
| H | -0.01344100 | -6.11546200 | 1.65543800  |
| H | -0.63842900 | -3.86429400 | -3.76743000 |
| H | -2.11153200 | -5.46747200 | -2.54856300 |
| H | -1.50385200 | -6.21528900 | -0.27501600 |
| C | 1.82720100  | 4.18027000  | 3.68203500  |
| C | 2.12955600  | 3.69329300  | 2.44544500  |
| C | 1.39408300  | 4.11111100  | 1.28659700  |
| C | 0.28154800  | 4.99920800  | 1.48534500  |
| C | 0.00971800  | 5.50009600  | 2.79870900  |
| C | 0.76700800  | 5.11729800  | 3.86199000  |
| C | 1.71425100  | 3.66673400  | -0.01576200 |
| C | -0.51843100 | 5.35105100  | 0.39945400  |
| C | -0.24868800 | 4.87596500  | -0.88461700 |
| C | 0.88936300  | 4.02401600  | -1.10464400 |
| C | 1.15086800  | 3.59437900  | -2.44676700 |
| H | 2.00666400  | 2.95590300  | -2.63360600 |
| C | 0.34263100  | 3.97136500  | -3.47920600 |
| C | -0.78856500 | 4.80959400  | -3.25438200 |
| C | -1.07332300 | 5.24557200  | -1.99527400 |
| H | 2.38948100  | 3.84079200  | 4.54614400  |
| H | 2.91753900  | 2.95933600  | 2.32446100  |
| H | -0.82835900 | 6.17925900  | 2.92628000  |
| H | 0.54575400  | 5.49423700  | 4.85526600  |
| H | -1.36589400 | 6.01563800  | 0.55390200  |
| H | 0.55807500  | 3.62675800  | -4.48528900 |
| H | -1.43076700 | 5.08261100  | -4.08509200 |
| H | -1.94297800 | 5.86830600  | -1.80644400 |
| H | -0.81289500 | 0.39665800  | 1.30704400  |
| C | -6.06308100 | -3.87451300 | 0.33056500  |
| C | -6.21802000 | -2.51888100 | 0.56181300  |
| C | -5.10171700 | -1.71374500 | 0.83785500  |
| C | -3.82431900 | -2.29866200 | 0.91293500  |
| C | -3.67882500 | -3.66771900 | 0.67976400  |
| C | -4.78838200 | -4.44513300 | 0.38363300  |
| H | -6.22951000 | 0.14160900  | 0.95313500  |
| H | -6.92560300 | -4.48671800 | 0.09227800  |
| H | -7.19999800 | -2.05999600 | 0.50320800  |
| C | -5.22851800 | -0.27942900 | 0.99873100  |
| C | -2.66789400 | -1.44502300 | 1.22963200  |
| H | -2.68457800 | -4.10476100 | 0.71016700  |

|   |             |             |             |
|---|-------------|-------------|-------------|
| H | -4.66140300 | -5.50391200 | 0.18175200  |
| C | -2.83161500 | 0.01858200  | 1.20525700  |
| C | -4.17334900 | 0.55236300  | 1.14978500  |
| H | -4.31770600 | 1.62293700  | 1.23102800  |
| C | -1.48665700 | -1.94612100 | 1.57345200  |
| C | -0.29665700 | -2.31973200 | 1.94149200  |
| C | 0.15580600  | -2.48293900 | 3.33945000  |
| C | -0.64246000 | -3.09089200 | 4.31027300  |
| C | 1.42211800  | -1.99555800 | 3.67270300  |
| C | -0.17399300 | -3.21119600 | 5.61394900  |
| H | -1.61884500 | -3.47830500 | 4.03268300  |
| C | 1.87780900  | -2.10979300 | 4.98114300  |
| H | 2.02991400  | -1.52470500 | 2.90412900  |
| C | 1.08494800  | -2.71898400 | 5.95087500  |
| H | 2.86131100  | -1.73055700 | 5.24038000  |
| H | 1.44872800  | -2.81448100 | 6.96904500  |
| N | -1.78348900 | 0.78845300  | 1.25210100  |
| C | -1.77956200 | 2.24875400  | 1.24386900  |
| H | -0.78646200 | 2.52454400  | 0.87194800  |
| H | -2.52158800 | 2.62634300  | 0.53590500  |
| C | -2.00334000 | 2.80697600  | 2.62972600  |
| C | -1.23821100 | 2.32925600  | 3.69593900  |
| C | -2.95463200 | 3.80121600  | 2.84838900  |
| C | -1.43811700 | 2.83832600  | 4.97347000  |
| H | -0.47777100 | 1.57298100  | 3.51141900  |
| C | -3.14550000 | 4.31752400  | 4.12859200  |
| H | -3.54012100 | 4.17422700  | 2.01015300  |
| C | -2.39048600 | 3.83289600  | 5.19208000  |
| H | -0.84073700 | 2.46614000  | 5.79994300  |
| H | -3.88826200 | 5.09149000  | 4.29453100  |
| H | -2.54317400 | 4.22912400  | 6.19103400  |
| H | 0.43739300  | -2.44717200 | 1.14147800  |
| C | -2.40750700 | 1.89303200  | -2.03599600 |
| C | -3.80957100 | 2.05699200  | -2.12202200 |
| C | -4.61916600 | 0.95674100  | -2.25769300 |
| C | -4.08028000 | -0.35029200 | -2.26040700 |
| C | -2.66817200 | -0.52194500 | -2.10722000 |
| C | -1.85057100 | 0.64731400  | -2.04118200 |
| H | -1.76593700 | 2.76619200  | -1.95929000 |
| H | -5.68811700 | 1.10579300  | -2.34478400 |
| H | -0.77780700 | 0.51415800  | -1.96167500 |
| N | -2.07107000 | -1.71657400 | -2.02195100 |
| H | -2.63095100 | -2.55645800 | -2.01832900 |
| H | -1.10090200 | -1.73643600 | -1.71245100 |

|   |             |             |             |
|---|-------------|-------------|-------------|
| C | -4.36949600 | 3.43317800  | -2.01182300 |
| F | -3.91925500 | 4.25987500  | -2.97078200 |
| F | -5.70815400 | 3.45417800  | -2.06500900 |
| F | -4.01546600 | 4.01166900  | -0.83581400 |
| C | -4.93637400 | -1.52203900 | -2.35915900 |
| O | -4.56516100 | -2.68404700 | -2.37916900 |
| C | -6.46519700 | -1.29982500 | -2.49040800 |
| F | -6.75426800 | -0.66627400 | -3.63531600 |
| F | -7.11503900 | -2.45486200 | -2.47721800 |
| H | -0.79094300 | -3.69080700 | 6.36704100  |
| F | -6.96040100 | -0.54450900 | -1.48750300 |

#### IM2-IV'

|   |            |             |             |
|---|------------|-------------|-------------|
| P | 1.32706900 | 0.01414400  | -0.24396800 |
| O | 2.45489800 | -0.96949800 | 0.45277100  |
| O | 2.26263300 | 0.81924900  | -1.32389000 |
| O | 0.85141000 | 0.91690500  | 0.85735200  |
| C | 3.28171000 | -1.64835500 | -0.41850400 |
| C | 4.34374100 | -0.95891200 | -1.01086900 |
| C | 3.03141700 | -2.99733400 | -0.67570000 |
| C | 3.87857700 | -3.64677000 | -1.56775400 |
| C | 4.91834400 | -2.98289200 | -2.22146900 |
| H | 3.70849900 | -4.70122600 | -1.77400900 |
| C | 3.44170300 | 1.34760300  | -0.85002900 |
| C | 4.52710500 | 0.48164200  | -0.65964600 |
| C | 3.51214000 | 2.71798100  | -0.60205400 |
| C | 4.71775100 | 3.22139400  | -0.10804100 |
| C | 5.79304100 | 2.38168800  | 0.16373300  |
| H | 4.80276600 | 4.28844900  | 0.08323000  |
| C | 5.70234100 | 1.00631800  | -0.10268300 |
| C | 6.87871400 | 0.16508700  | 0.33320400  |
| C | 8.24714900 | 0.75298000  | -0.08197600 |
| H | 8.54071900 | 0.35658400  | -1.05935500 |
| C | 8.25226000 | 2.29436600  | -0.12993100 |
| H | 8.12270700 | 2.63286900  | -1.16322800 |
| C | 7.10675700 | 2.88955200  | 0.70073100  |
| H | 7.22782700 | 2.59427400  | 1.75261300  |
| H | 6.84321900 | 0.12414500  | 1.43014900  |
| C | 5.14574400 | -1.62265100 | -1.96067900 |
| C | 6.16720300 | -0.84953900 | -2.77428400 |
| C | 7.22550100 | -1.74183800 | -3.41616500 |
| H | 7.88641600 | -2.14946900 | -2.63909000 |
| C | 6.55657200 | -2.89067900 | -4.16463900 |
| H | 7.29341600 | -3.49126200 | -4.70633800 |



|   |             |             |             |
|---|-------------|-------------|-------------|
| C | 5.78908500  | -3.77073400 | -3.18202700 |
| H | 6.50884900  | -4.35779600 | -2.59521200 |
| H | 5.62127800  | -0.31505900 | -3.56519500 |
| H | 7.13218000  | 3.98271800  | 0.67339200  |
| H | 9.21587900  | 2.68245300  | 0.21230400  |
| H | 8.99836300  | 0.39561700  | 0.62873900  |
| H | 6.78160100  | -0.86764000 | -0.00911100 |
| H | 6.63709500  | -0.07149100 | -2.17165100 |
| H | 7.85091200  | -1.14659800 | -4.08852200 |
| H | 5.86585200  | -2.47791500 | -4.91062200 |
| H | 5.16975000  | -4.49750900 | -3.71787100 |
| O | 0.35984100  | -0.78185800 | -1.05844600 |
| C | 3.33859700  | -4.08716600 | 3.43849800  |
| C | 3.23835400  | -3.75217800 | 2.12129600  |
| C | 2.05708100  | -4.05975000 | 1.36950600  |
| C | 0.99103800  | -4.74858700 | 2.04098600  |
| C | 1.12951900  | -5.06300400 | 3.43052100  |
| C | 2.26490600  | -4.74359100 | 4.10973900  |
| C | 1.91655600  | -3.71239300 | 0.00989300  |
| C | -0.15998800 | -5.08910300 | 1.33106000  |
| C | -0.30117600 | -4.77281000 | -0.02012700 |
| C | 0.74487900  | -4.05447400 | -0.69467300 |
| C | 0.53761700  | -3.68895100 | -2.06507000 |
| H | 1.29103200  | -3.08710800 | -2.56010800 |
| C | -0.59491200 | -4.06190500 | -2.72727000 |
| C | -1.61202500 | -4.81425200 | -2.06663800 |
| C | -1.47337900 | -5.14588400 | -0.75240800 |
| H | 4.24128200  | -3.84431100 | 3.99033000  |
| H | 4.05786100  | -3.24632300 | 1.62209200  |
| H | 0.30204800  | -5.55885900 | 3.93020900  |
| H | 2.35662000  | -4.97930200 | 5.16494400  |
| H | -0.96374000 | -5.61492200 | 1.84217200  |
| H | -0.73436100 | -3.77459700 | -3.76485700 |
| H | -2.49553000 | -5.12382600 | -2.61738700 |
| H | -2.24335200 | -5.71400700 | -0.23611500 |
| C | 1.41125800  | 4.66972000  | 2.58540700  |
| C | 2.04334300  | 4.01121700  | 1.57288000  |
| C | 1.69583900  | 4.25285500  | 0.20107300  |
| C | 0.61274500  | 5.15937500  | -0.06782700 |
| C | -0.01333800 | 5.84250900  | 1.02522500  |
| C | 0.38001300  | 5.61727200  | 2.30922300  |
| C | 2.34081800  | 3.60094000  | -0.86792000 |
| C | 0.17206800  | 5.33505200  | -1.37762900 |
| C | 0.77416200  | 4.66246700  | -2.44145900 |

|   |             |             |             |
|---|-------------|-------------|-------------|
| C | 1.88819600  | 3.79188000  | -2.19091300 |
| C | 2.49853700  | 3.14755700  | -3.31533800 |
| H | 3.34946700  | 2.49695100  | -3.14766800 |
| C | 2.02488400  | 3.33654900  | -4.57924500 |
| C | 0.90771500  | 4.18761300  | -4.82047600 |
| C | 0.30627600  | 4.83164300  | -3.78281600 |
| H | 1.66961500  | 4.45507600  | 3.61730500  |
| H | 2.79955000  | 3.26641700  | 1.79263900  |
| H | -0.81736300 | 6.53858400  | 0.80131400  |
| H | -0.10630200 | 6.12982200  | 3.13293200  |
| H | -0.66208200 | 6.00467100  | -1.57433400 |
| H | 2.50070900  | 2.83287900  | -5.41441400 |
| H | 0.54329800  | 4.32048000  | -5.83396700 |
| H | -0.54330400 | 5.48771300  | -3.95058900 |
| H | -0.83322800 | 0.93456700  | 1.02836700  |
| C | -6.62185800 | -2.58951200 | 0.49457400  |
| C | -6.57453600 | -1.26620200 | 0.89902000  |
| C | -5.34062200 | -0.64514200 | 1.13970700  |
| C | -4.14873400 | -1.37032800 | 0.95756500  |
| C | -4.20527400 | -2.70744900 | 0.56129000  |
| C | -5.43386500 | -3.31012800 | 0.33461300  |
| H | -6.19967100 | 1.25294400  | 1.75865900  |
| H | -7.57522300 | -3.06136300 | 0.28473800  |
| H | -7.48922000 | -0.69305300 | 1.02181800  |
| C | -5.26440900 | 0.74030300  | 1.55256900  |
| C | -2.86893400 | -0.68741700 | 1.18773900  |
| H | -3.27784500 | -3.25040700 | 0.39720500  |
| H | -5.47111600 | -4.34229800 | 0.00259300  |
| C | -2.85275300 | 0.77624600  | 1.34445200  |
| C | -4.10452000 | 1.42890700  | 1.65256400  |
| H | -4.10008700 | 2.47461700  | 1.93371300  |
| C | -1.72896000 | -1.32904600 | 1.41913800  |
| C | -0.56903100 | -1.78580300 | 1.79115300  |
| C | -0.17844300 | -1.89046100 | 3.21649400  |
| C | -1.07538600 | -2.31609600 | 4.19917400  |
| C | 1.11391000  | -1.49336300 | 3.56964200  |
| C | -0.68141400 | -2.34359300 | 5.53167400  |
| H | -2.07320500 | -2.63345100 | 3.90885500  |
| C | 1.49680500  | -1.51475000 | 4.90736900  |
| H | 1.80005800  | -1.16454300 | 2.79331800  |
| C | 0.60401700  | -1.94038400 | 5.88823400  |
| H | 2.50155800  | -1.20759700 | 5.18090200  |
| H | 0.90992300  | -1.96324100 | 6.92944500  |
| N | -1.72753900 | 1.42384800  | 1.26271300  |

|   |             |             |             |
|---|-------------|-------------|-------------|
| C | -1.50360600 | 2.82031700  | 1.63394900  |
| H | -0.54790200 | 3.08492200  | 1.17223000  |
| H | -2.28103900 | 3.45699200  | 1.20351200  |
| C | -1.40734500 | 2.94619600  | 3.13801000  |
| C | -0.52286100 | 2.11075100  | 3.82784900  |
| C | -2.17022800 | 3.87456100  | 3.84047900  |
| C | -0.41451900 | 2.20348200  | 5.20973800  |
| H | 0.08448300  | 1.39984300  | 3.26940300  |
| C | -2.05084400 | 3.97550200  | 5.22598100  |
| H | -2.84960100 | 4.53115600  | 3.30124100  |
| C | -1.17653700 | 3.13837800  | 5.91078200  |
| H | 0.26602600  | 1.54376000  | 5.73873500  |
| H | -2.64626200 | 4.70325900  | 5.76805300  |
| H | -1.08934100 | 3.21129700  | 6.99009700  |
| H | 0.16785500  | -2.01856000 | 1.02031200  |
| C | -3.68777900 | -1.84951200 | -2.54454800 |
| C | -4.99286100 | -1.30272900 | -2.53013400 |
| C | -5.17341600 | 0.01458700  | -2.19342600 |
| C | -4.07186300 | 0.85035800  | -1.88988200 |
| C | -2.74776100 | 0.31469300  | -1.97733600 |
| C | -2.59727800 | -1.07617700 | -2.26673500 |
| H | -3.55540800 | -2.90621500 | -2.75616200 |
| H | -6.18223500 | 0.40774100  | -2.15459700 |
| H | -1.59386000 | -1.49331200 | -2.23887400 |
| N | -1.64409500 | 1.04361200  | -1.79491100 |
| H | -1.71291700 | 2.02080300  | -1.55474700 |
| H | -0.75481700 | 0.54548100  | -1.75883200 |
| C | -6.15758100 | -2.14628700 | -2.93149100 |
| F | -5.99427700 | -3.43489400 | -2.57572900 |
| F | -7.30838000 | -1.72067400 | -2.38346800 |
| F | -6.34971600 | -2.15227500 | -4.26366000 |
| C | -4.25934000 | 2.22166400  | -1.45772500 |
| O | -3.37740900 | 2.99709800  | -1.11425000 |
| C | -5.70107400 | 2.79099700  | -1.42751800 |
| F | -6.51602900 | 2.07562500  | -0.62851300 |
| F | -5.70289400 | 4.04023200  | -0.98374600 |
| H | -1.37747100 | -2.68022900 | 6.29317800  |
| F | -6.23904100 | 2.77781100  | -2.65392200 |

#### TS2-IV

Value of imaginary frequency = -278.65 cm<sup>-1</sup>

|   |            |             |             |
|---|------------|-------------|-------------|
| P | 1.38381800 | -0.24031800 | -0.20812900 |
| O | 2.54640100 | -1.09881000 | 0.58343500  |
| O | 2.31828400 | 0.81851200  | -1.04220500 |

|   |            |             |             |
|---|------------|-------------|-------------|
| O | 0.56057100 | 0.44569000  | 0.83264300  |
| C | 3.44812300 | -1.69589700 | -0.27541100 |
| C | 4.48389000 | -0.91220800 | -0.79280300 |
| C | 3.25963800 | -3.03229800 | -0.63958900 |
| C | 4.18358600 | -3.58365700 | -1.52190800 |
| C | 5.21610800 | -2.83106300 | -2.08562400 |
| H | 4.07156100 | -4.62702400 | -1.80904600 |
| C | 3.44710000 | 1.33488100  | -0.45272400 |
| C | 4.57975600 | 0.50916300  | -0.33635200 |
| C | 3.43308800 | 2.66260800  | -0.02254400 |
| C | 4.62268800 | 3.17769500  | 0.50464800  |
| C | 5.74938400 | 2.38361300  | 0.66939000  |
| H | 4.64484300 | 4.21636400  | 0.82552600  |
| C | 5.72499700 | 1.03505200  | 0.27821600  |
| C | 6.94037900 | 0.21875700  | 0.65289800  |
| C | 8.28090800 | 0.90350200  | 0.29847000  |
| H | 8.60401600 | 0.59551400  | -0.70122800 |
| C | 8.20701900 | 2.44179100  | 0.36397100  |
| H | 8.04986600 | 2.84806300  | -0.64078900 |
| C | 7.03994400 | 2.91106400  | 1.24291300  |
| H | 7.18302300 | 2.53880000  | 2.26734900  |
| H | 6.90166800 | 0.09046500  | 1.74296600  |
| C | 5.35181100 | -1.47499300 | -1.75020500 |
| C | 6.34314900 | -0.60230900 | -2.49749200 |
| C | 7.48558900 | -1.39443900 | -3.12589100 |
| H | 8.13907500 | -1.79174600 | -2.33710900 |
| C | 6.92589300 | -2.55020900 | -3.94979800 |
| H | 7.72308300 | -3.07993600 | -4.47995200 |
| C | 6.17338000 | -3.51859800 | -3.04133000 |
| H | 6.90303800 | -4.08752200 | -2.44883400 |
| H | 5.78839300 | -0.08424500 | -3.29289300 |
| H | 7.01016000 | 4.00276100  | 1.30377300  |
| H | 9.15282700 | 2.85298200  | 0.72821000  |
| H | 9.04263500 | 0.53359900  | 0.99145900  |
| H | 6.89703300 | -0.78738600 | 0.23128300  |
| H | 6.73079200 | 0.18837200  | -1.85454400 |
| H | 8.09760100 | -0.73167900 | -3.74546800 |
| H | 6.24426200 | -2.14946600 | -4.71054900 |
| H | 5.62417400 | -4.25637100 | -3.63556000 |
| O | 0.77365400 | -1.11859300 | -1.25497100 |
| C | 2.94736200 | -4.18988800 | 3.47561000  |
| C | 3.04677500 | -3.83280900 | 2.16425600  |
| C | 2.02259000 | -4.18181300 | 1.22396000  |
| C | 0.89418000 | -4.92961300 | 1.70546600  |

|   |             |             |             |
|---|-------------|-------------|-------------|
| C | 0.82562100  | -5.27730000 | 3.09212600  |
| C | 1.81809700  | -4.92008100 | 3.95153300  |
| C | 2.09172300  | -3.81457900 | -0.13552200 |
| C | -0.12679700 | -5.27778700 | 0.82277000  |
| C | -0.07900600 | -4.91241300 | -0.52279400 |
| C | 1.05015200  | -4.17439000 | -1.01935500 |
| C | 1.03123100  | -3.76766900 | -2.39489200 |
| H | 1.85027400  | -3.16395000 | -2.76670500 |
| C | -0.01971000 | -4.07546400 | -3.20722600 |
| C | -1.13829400 | -4.80973600 | -2.71024800 |
| C | -1.16480900 | -5.21115900 | -1.40808300 |
| H | 3.73350400  | -3.91350900 | 4.17121900  |
| H | 3.90887100  | -3.27603700 | 1.81339400  |
| H | -0.04618700 | -5.82257900 | 3.44245100  |
| H | 1.75100100  | -5.17768200 | 5.00351100  |
| H | -0.98949200 | -5.82520500 | 1.19650300  |
| H | -0.01894300 | -3.74137600 | -4.23960400 |
| H | -1.97067400 | -5.03508100 | -3.36964700 |
| H | -2.01271800 | -5.76467500 | -1.01342100 |
| C | 1.79815900  | 4.17334900  | 3.61427300  |
| C | 2.25318200  | 3.62099400  | 2.45483300  |
| C | 1.71075100  | 4.00968700  | 1.18380600  |
| C | 0.61728100  | 4.94254500  | 1.18638600  |
| C | 0.18174600  | 5.51056700  | 2.42662900  |
| C | 0.76227600  | 5.15297500  | 3.60335800  |
| C | 2.19957000  | 3.50403700  | -0.04245300 |
| C | -0.00622600 | 5.27391300  | -0.01509900 |
| C | 0.42791000  | 4.73973900  | -1.22867900 |
| C | 1.56001900  | 3.85348600  | -1.25203600 |
| C | 2.00775200  | 3.38015100  | -2.52832300 |
| H | 2.86944800  | 2.72414200  | -2.56844400 |
| C | 1.36878500  | 3.73721500  | -3.67956600 |
| C | 0.23240600  | 4.59864300  | -3.64823400 |
| C | -0.22195900 | 5.08200700  | -2.45767900 |
| H | 2.21658900  | 3.85291900  | 4.56326600  |
| H | 3.02289600  | 2.85919900  | 2.48341600  |
| H | -0.63611500 | 6.22517800  | 2.40383300  |
| H | 0.41654800  | 5.58146100  | 4.53817400  |
| H | -0.84589300 | 5.96603300  | -0.00799000 |
| H | 1.72628400  | 3.36172900  | -4.63283800 |
| H | -0.27437300 | 4.85730000  | -4.57249800 |
| H | -1.09352600 | 5.72938400  | -2.41685800 |
| H | -1.26399700 | 0.47616300  | 0.65896500  |
| C | -7.24721900 | -2.78620700 | 1.21959700  |

|   |             |             |             |
|---|-------------|-------------|-------------|
| C | -7.10916500 | -1.41782600 | 1.32068300  |
| C | -5.84437400 | -0.81512000 | 1.18865500  |
| C | -4.70642700 | -1.61481100 | 0.95140100  |
| C | -4.86469400 | -3.00844300 | 0.84897300  |
| C | -6.11497200 | -3.58069100 | 0.97967500  |
| H | -6.57901300 | 1.21306900  | 1.41180900  |
| H | -8.22420800 | -3.24677300 | 1.31483200  |
| H | -7.97552900 | -0.78591200 | 1.49518700  |
| C | -5.68685600 | 0.61399600  | 1.24715500  |
| C | -3.40947800 | -0.97134900 | 0.81698700  |
| H | -3.99422900 | -3.62421000 | 0.64002600  |
| H | -6.22268100 | -4.65631600 | 0.88638000  |
| C | -3.29579900 | 0.46605300  | 0.87879800  |
| C | -4.49282700 | 1.23696500  | 1.09804900  |
| H | -4.42217000 | 2.31577700  | 1.15631400  |
| C | -2.24480100 | -1.66884900 | 0.64158900  |
| C | -1.11391900 | -2.13195600 | 1.12125300  |
| C | -0.91096500 | -2.18166000 | 2.59302200  |
| C | -1.94368100 | -2.55131500 | 3.45918800  |
| C | 0.33855400  | -1.82639200 | 3.11104200  |
| C | -1.73395600 | -2.55219400 | 4.83347900  |
| H | -2.90720800 | -2.84400700 | 3.05098600  |
| C | 0.53551300  | -1.81855900 | 4.48771800  |
| H | 1.14171600  | -1.54052900 | 2.43924000  |
| C | -0.49572500 | -2.18014000 | 5.35066200  |
| H | 1.50676700  | -1.53808200 | 4.88321300  |
| H | -0.33393800 | -2.17891000 | 6.42404500  |
| N | -2.11843000 | 1.04580100  | 0.72993200  |
| C | -1.83224600 | 2.46933600  | 0.86542300  |
| H | -0.81903500 | 2.59398800  | 0.46935200  |
| H | -2.51154100 | 3.05727400  | 0.23923900  |
| C | -1.88709600 | 2.90040300  | 2.31496700  |
| C | -1.10070200 | 2.22083500  | 3.24885000  |
| C | -2.72099300 | 3.93403700  | 2.73579100  |
| C | -1.16558400 | 2.56860400  | 4.59250200  |
| H | -0.44051100 | 1.42565900  | 2.90712600  |
| C | -2.77908000 | 4.28715700  | 4.08268700  |
| H | -3.32381600 | 4.46936100  | 2.00418600  |
| C | -2.00528100 | 3.60007400  | 5.01238200  |
| H | -0.55643000 | 2.03272300  | 5.31404800  |
| H | -3.43354600 | 5.09135800  | 4.40426700  |
| H | -2.05592900 | 3.86669200  | 6.06359100  |
| H | -0.28892000 | -2.42470400 | 0.47498800  |
| C | -1.91288000 | 1.84515400  | -2.61516600 |

|   |             |             |             |
|---|-------------|-------------|-------------|
| C | -3.29700600 | 2.09042000  | -2.66012400 |
| C | -4.19212000 | 1.05663700  | -2.50637300 |
| C | -3.73559900 | -0.25026300 | -2.22314000 |
| C | -2.34349500 | -0.47278100 | -2.06571900 |
| C | -1.44511900 | 0.58774400  | -2.33170900 |
| H | -1.21254900 | 2.65491900  | -2.79722900 |
| H | -5.25126500 | 1.25917700  | -2.60191600 |
| H | -0.38175800 | 0.38696900  | -2.28559200 |
| N | -1.84531100 | -1.65162600 | -1.55537700 |
| H | -2.36868100 | -2.49506300 | -1.76724300 |
| H | -0.81297000 | -1.70251900 | -1.55972500 |
| C | -3.76039400 | 3.50017000  | -2.84749600 |
| F | -3.11865000 | 4.11087800  | -3.85555200 |
| F | -5.07432900 | 3.58127900  | -3.09286800 |
| F | -3.52021000 | 4.24498300  | -1.74609200 |
| C | -4.66436700 | -1.38598900 | -2.16575000 |
| O | -4.34022200 | -2.55333500 | -2.06342700 |
| C | -6.17948700 | -1.11293900 | -2.33965400 |
| F | -6.42251000 | -0.71782800 | -3.59843400 |
| F | -6.88050800 | -2.20862000 | -2.09731600 |
| H | -2.53883700 | -2.84422400 | 5.50025800  |
| F | -6.62552300 | -0.14355900 | -1.52604500 |

#### TS2-IV'

Value of imaginary frequency = -317.79 cm<sup>-1</sup>

|   |            |             |             |
|---|------------|-------------|-------------|
| P | 1.42930500 | -0.20612400 | -0.48679300 |
| O | 2.24363900 | -1.05211200 | 0.67615200  |
| O | 2.67194900 | 0.18397800  | -1.48222600 |
| O | 0.85657500 | 0.99642300  | 0.19407000  |
| C | 3.03926600 | -2.07224800 | 0.19550600  |
| C | 4.29087000 | -1.74552600 | -0.33262400 |
| C | 2.56902900 | -3.38595200 | 0.23338600  |
| C | 3.40078200 | -4.37747600 | -0.27919000 |
| C | 4.63701300 | -4.08798400 | -0.85811800 |
| H | 3.05874400 | -5.40970500 | -0.24699700 |
| C | 3.84608000 | 0.62905200  | -0.91648400 |
| C | 4.69881200 | -0.31046800 | -0.31696600 |
| C | 4.16693500 | 1.98453700  | -0.99814500 |
| C | 5.37204200 | 2.39983600  | -0.42409100 |
| C | 6.20159000 | 1.50954100  | 0.24640100  |
| H | 5.64724800 | 3.44980300  | -0.48991000 |
| C | 5.86416900 | 0.14914700  | 0.31300000  |
| C | 6.76430000 | -0.71765200 | 1.16220600  |
| C | 8.27119700 | -0.49784400 | 0.89365200  |

|   |             |             |             |
|---|-------------|-------------|-------------|
| H | 8.61804500  | -1.19745500 | 0.12630200  |
| C | 8.60401900  | 0.94443800  | 0.46207500  |
| H | 8.69332500  | 0.99335600  | -0.62827900 |
| C | 7.50263800  | 1.92740500  | 0.88228400  |
| H | 7.40983500  | 1.92413400  | 1.97761700  |
| H | 6.56083100  | -0.44615500 | 2.20681200  |
| C | 5.08210500  | -2.75838400 | -0.90986500 |
| C | 6.34241200  | -2.40519700 | -1.67768600 |
| C | 7.29317000  | -3.58639000 | -1.84765700 |
| H | 7.73724900  | -3.84663100 | -0.87708100 |
| C | 6.53612700  | -4.79177700 | -2.39664400 |
| H | 7.21632700  | -5.62192300 | -2.60964300 |
| C | 5.47234700  | -5.23464300 | -1.39580600 |
| H | 5.96696500  | -5.72956300 | -0.54875800 |
| H | 6.03304700  | -2.04859600 | -2.67081400 |
| H | 7.75856400  | 2.94958800  | 0.58882900  |
| H | 9.57001100  | 1.25120100  | 0.87329600  |
| H | 8.81781900  | -0.75308200 | 1.80652000  |
| H | 6.50641300  | -1.77493000 | 1.07136700  |
| H | 6.85764800  | -1.56223700 | -1.21615000 |
| H | 8.11642000  | -3.30457600 | -2.51131200 |
| H | 6.06009200  | -4.51364100 | -3.34533900 |
| H | 4.81152200  | -5.98502400 | -1.84213200 |
| O | 0.56004200  | -1.16078200 | -1.25278800 |
| C | 1.89716600  | -3.19730300 | 4.44763800  |
| C | 2.10265700  | -3.24733000 | 3.10215400  |
| C | 1.05193400  | -3.64148400 | 2.20970200  |
| C | -0.21718200 | -4.00149500 | 2.77754600  |
| C | -0.40336500 | -3.88859700 | 4.19276300  |
| C | 0.61992800  | -3.50549800 | 5.00368900  |
| C | 1.24065400  | -3.72511500 | 0.81598600  |
| C | -1.22735400 | -4.48974300 | 1.94964200  |
| C | -1.02963500 | -4.64159000 | 0.57635700  |
| C | 0.20867500  | -4.21221200 | -0.01213200 |
| C | 0.34885400  | -4.31021900 | -1.43605200 |
| H | 1.23732300  | -3.89482800 | -1.89706700 |
| C | -0.61972200 | -4.89566400 | -2.19728100 |
| C | -1.81112100 | -5.40270400 | -1.59729800 |
| C | -2.02140100 | -5.25018300 | -0.25896600 |
| H | 2.70766700  | -2.90474600 | 5.10793800  |
| H | 3.07345500  | -2.99846400 | 2.68750700  |
| H | -1.38001700 | -4.12828600 | 4.60385100  |
| H | 0.46919500  | -3.42716400 | 6.07544300  |
| H | -2.17477100 | -4.79404200 | 2.38906000  |



|   |             |             |             |
|---|-------------|-------------|-------------|
| H | -0.49250700 | -4.96850500 | -3.27226700 |
| H | -2.55653400 | -5.89111200 | -2.21806600 |
| H | -2.93745000 | -5.60505700 | 0.20642500  |
| C | 2.34631000  | 5.18698100  | 1.18162700  |
| C | 2.86315100  | 4.12887900  | 0.49493600  |
| C | 2.71121000  | 4.02096300  | -0.92914600 |
| C | 1.93242600  | 5.02721300  | -1.59783600 |
| C | 1.40862900  | 6.12331000  | -0.83859900 |
| C | 1.62295900  | 6.21305100  | 0.50306000  |
| C | 3.27168000  | 2.96423800  | -1.67461000 |
| C | 1.70070600  | 4.92031900  | -2.96715800 |
| C | 2.22313300  | 3.86276700  | -3.71109900 |
| C | 3.03485800  | 2.87183300  | -3.06246900 |
| C | 3.59149200  | 1.82986200  | -3.87264600 |
| H | 4.22016400  | 1.08105100  | -3.40474900 |
| C | 3.34117900  | 1.76719900  | -5.21083100 |
| C | 2.51890900  | 2.74225100  | -5.84634200 |
| C | 1.98152000  | 3.75835700  | -5.11720000 |
| H | 2.45066100  | 5.23816100  | 2.26115500  |
| H | 3.37928400  | 3.33656500  | 1.02480700  |
| H | 0.83879900  | 6.88470300  | -1.36473700 |
| H | 1.22578500  | 7.04819600  | 1.07111000  |
| H | 1.10394000  | 5.67960000  | -3.46763500 |
| H | 3.77079700  | 0.96544900  | -5.80262300 |
| H | 2.32886000  | 2.67148700  | -6.91246700 |
| H | 1.35857700  | 4.51378300  | -5.58813900 |
| H | -0.79029000 | 1.67641500  | 0.45584200  |
| C | -7.36167000 | 0.18258700  | 1.57192700  |
| C | -6.85876700 | 1.46476100  | 1.61880500  |
| C | -5.48203800 | 1.70033000  | 1.43574100  |
| C | -4.60856500 | 0.61235700  | 1.22330000  |
| C | -5.13600900 | -0.69152100 | 1.18866000  |
| C | -6.49175800 | -0.89909200 | 1.34878400  |
| H | -5.63100900 | 3.85692000  | 1.58505600  |
| H | -8.42443000 | 0.00661100  | 1.69571700  |
| H | -7.51935200 | 2.31236000  | 1.77863200  |
| C | -4.94336600 | 3.03241400  | 1.41410200  |
| C | -3.19354800 | 0.88638800  | 1.03183000  |
| H | -4.46933400 | -1.52824800 | 0.99241900  |
| H | -6.88832300 | -1.90658100 | 1.28015000  |
| C | -2.70795600 | 2.23734400  | 0.92773700  |
| C | -3.63491900 | 3.30692400  | 1.17577600  |
| H | -3.28194700 | 4.33002400  | 1.16807900  |
| C | -2.25200800 | -0.09609100 | 0.93800000  |

|   |             |             |             |
|---|-------------|-------------|-------------|
| C | -1.30680400 | -0.85549600 | 1.43037900  |
| C | -1.05799500 | -0.73302400 | 2.89493700  |
| C | -2.10239700 | -0.77752600 | 3.82212500  |
| C | 0.24537800  | -0.46229800 | 3.31924800  |
| C | -1.84712300 | -0.54055100 | 5.16777100  |
| H | -3.11110600 | -0.99427400 | 3.48128400  |
| C | 0.48825000  | -0.21286300 | 4.66711300  |
| H | 1.05125200  | -0.42992300 | 2.59100500  |
| C | -0.55277200 | -0.24824700 | 5.59123200  |
| H | 1.50186100  | -0.00074900 | 4.99433100  |
| H | -0.35565800 | -0.05470000 | 6.64104000  |
| N | -1.44515400 | 2.46097000  | 0.59829800  |
| C | -0.78405300 | 3.75791500  | 0.66283200  |
| H | 0.17386600  | 3.62637000  | 0.15005000  |
| H | -1.35788600 | 4.50719000  | 0.10877400  |
| C | -0.54768700 | 4.18416900  | 2.09552500  |
| C | 0.07693100  | 3.29161500  | 2.97110800  |
| C | -0.91366800 | 5.44832900  | 2.54933300  |
| C | 0.33080900  | 3.66610800  | 4.28449600  |
| H | 0.37087900  | 2.30819800  | 2.60861900  |
| C | -0.64908000 | 5.82863800  | 3.86425700  |
| H | -1.39490900 | 6.14544400  | 1.86638000  |
| C | -0.02744300 | 4.93761200  | 4.73279000  |
| H | 0.80900300  | 2.96326800  | 4.95951400  |
| H | -0.93541400 | 6.81699200  | 4.20965300  |
| H | 0.17362400  | 5.22980300  | 5.75848900  |
| H | -0.64639700 | -1.46248700 | 0.81009500  |
| C | -4.25703600 | -2.89854000 | -1.81741000 |
| C | -5.44853400 | -2.19728700 | -2.07093900 |
| C | -5.43862700 | -0.82336100 | -2.16542000 |
| C | -4.24631200 | -0.09827800 | -1.97663200 |
| C | -3.05321200 | -0.80665200 | -1.67233600 |
| C | -3.07938800 | -2.21781600 | -1.62834300 |
| H | -4.26693300 | -3.98254700 | -1.76223900 |
| H | -6.36809500 | -0.31020300 | -2.37709000 |
| H | -2.15244300 | -2.74411200 | -1.41724300 |
| N | -1.90067800 | -0.18141600 | -1.28545200 |
| H | -1.84297600 | 0.80790800  | -1.51069100 |
| H | -0.98447500 | -0.69022600 | -1.35498800 |
| C | -6.73089400 | -2.96176800 | -2.16335800 |
| F | -7.14701100 | -3.37524800 | -0.94975300 |
| F | -7.72292500 | -2.23217700 | -2.68927000 |
| F | -6.59703100 | -4.06868500 | -2.91063200 |
| C | -4.23666800 | 1.36740500  | -2.06247200 |

|   |             |             |             |
|---|-------------|-------------|-------------|
| O | -3.25301800 | 2.07931900  | -1.98699900 |
| C | -5.58470500 | 2.09374000  | -2.29690200 |
| F | -6.49290100 | 1.75791200  | -1.37059500 |
| F | -5.41900000 | 3.40730000  | -2.25488900 |
| H | -2.66095800 | -0.57685500 | 5.88467700  |
| F | -6.08904800 | 1.76868200  | -3.49631900 |

#### IM3-IV

|   |            |             |             |
|---|------------|-------------|-------------|
| P | 1.35053300 | -0.02809200 | -0.24736400 |
| O | 2.45427900 | -0.84844500 | 0.60849800  |
| O | 2.24626400 | 0.65609800  | -1.39334700 |
| O | 0.61091200 | 0.88363300  | 0.64512700  |
| C | 3.34647700 | -1.62182800 | -0.12708300 |
| C | 4.38270600 | -0.98725400 | -0.81815700 |
| C | 3.15002200 | -3.00216700 | -0.14811800 |
| C | 4.04202400 | -3.75360100 | -0.90672900 |
| C | 5.05890400 | -3.16229900 | -1.65941200 |
| H | 3.92235700 | -4.83432700 | -0.93096500 |
| C | 3.40138000 | 1.29377800  | -0.96471200 |
| C | 4.51825200 | 0.49653500  | -0.68782600 |
| C | 3.38124200 | 2.67986000  | -0.82558700 |
| C | 4.57492600 | 3.28880900  | -0.42745800 |
| C | 5.70194400 | 2.53629400  | -0.11509000 |
| H | 4.60373000 | 4.37104700  | -0.32825300 |
| C | 5.67422900 | 1.13495700  | -0.21470000 |
| C | 6.89319300 | 0.41093100  | 0.30520200  |
| C | 8.22538800 | 0.99970600  | -0.21292000 |
| H | 8.51773300 | 0.49780300  | -1.14082500 |
| C | 8.15813300 | 2.52192600  | -0.45016600 |
| H | 7.99821200 | 2.72446400  | -1.51422500 |
| C | 6.99965100 | 3.16425100  | 0.32551600  |
| H | 7.14988600 | 3.00688500  | 1.40284100  |
| H | 6.87474800 | 0.51794100  | 1.39801100  |
| C | 5.22124400 | -1.76788200 | -1.63944800 |
| C | 6.21176400 | -1.10210400 | -2.57630700 |
| C | 7.32718700 | -2.03752700 | -3.03289900 |
| H | 7.99038300 | -2.26466200 | -2.18716000 |
| C | 6.72988700 | -3.33356800 | -3.57241500 |
| H | 7.50634300 | -3.98408600 | -3.98532200 |
| C | 5.98004100 | -4.06281700 | -2.46105300 |
| H | 6.71039200 | -4.50649600 | -1.77084900 |
| H | 5.64978900 | -0.75987500 | -3.45703500 |
| H | 6.97288400 | 4.24544900  | 0.16373900  |
| H | 9.10689200 | 2.99210700  | -0.17750700 |

|   |             |             |             |
|---|-------------|-------------|-------------|
| H | 9.00441400  | 0.76522500  | 0.51834400  |
| H | 6.84060700  | -0.66172000 | 0.10771200  |
| H | 6.62606200  | -0.19830800 | -2.12842200 |
| H | 7.93635700  | -1.54016600 | -3.79356500 |
| H | 6.04011300  | -3.09583800 | -4.39178500 |
| H | 5.40207100  | -4.89809700 | -2.86949200 |
| O | 0.57816500  | -1.06119000 | -1.12381400 |
| C | 3.25485100  | -3.20952400 | 4.12545000  |
| C | 3.21639600  | -3.14409900 | 2.76390600  |
| C | 2.11248600  | -3.68773600 | 2.02977100  |
| C | 1.05143500  | -4.30680900 | 2.77349900  |
| C | 1.13088100  | -4.35398200 | 4.20061100  |
| C | 2.19780800  | -3.82367200 | 4.85857900  |
| C | 2.03649200  | -3.63054400 | 0.62190500  |
| C | -0.04714400 | -4.83232500 | 2.09461000  |
| C | -0.14287300 | -4.76621400 | 0.70620300  |
| C | 0.91605200  | -4.15739400 | -0.05225000 |
| C | 0.74898300  | -4.05187200 | -1.47337900 |
| H | 1.52016500  | -3.55596100 | -2.05208800 |
| C | -0.37588900 | -4.52014100 | -2.08513200 |
| C | -1.41560700 | -5.14313300 | -1.33064700 |
| C | -1.30128600 | -5.25552000 | 0.02173700  |
| H | 4.10047500  | -2.79005900 | 4.66125200  |
| H | 4.03047800  | -2.67831800 | 2.21902500  |
| H | 0.30895800  | -4.80890400 | 4.74599300  |
| H | 2.24350900  | -3.85342000 | 5.94229000  |
| H | -0.85777300 | -5.28172200 | 2.66356700  |
| H | -0.49377400 | -4.41077100 | -3.15823700 |
| H | -2.30466100 | -5.49794200 | -1.83924000 |
| H | -2.08960300 | -5.71552800 | 0.61136500  |
| C | 1.56000200  | 4.75834900  | 2.44240800  |
| C | 2.10627100  | 4.05581200  | 1.40880900  |
| C | 1.55626600  | 4.12984200  | 0.08580000  |
| C | 0.35776600  | 4.90236800  | -0.09314600 |
| C | -0.16998800 | 5.64304500  | 1.01269000  |
| C | 0.41948000  | 5.58912400  | 2.23948200  |
| C | 2.11874200  | 3.45137400  | -1.01738400 |
| C | -0.27996600 | 4.90410000  | -1.33330300 |
| C | 0.23625900  | 4.19382400  | -2.41718300 |
| C | 1.47226200  | 3.47686800  | -2.27031600 |
| C | 1.99220700  | 2.80217800  | -3.42235200 |
| H | 2.94192000  | 2.28497600  | -3.34178800 |
| C | 1.31019600  | 2.79240500  | -4.60195800 |
| C | 0.05768500  | 3.46147500  | -4.72765000 |

|   |             |             |             |
|---|-------------|-------------|-------------|
| C | -0.45357400 | 4.15208300  | -3.67156200 |
| H | 1.98655600  | 4.67612700  | 3.43658800  |
| H | 2.96021500  | 3.41260400  | 1.58599500  |
| H | -1.05912700 | 6.24617900  | 0.84698000  |
| H | 0.01032900  | 6.14819400  | 3.07437200  |
| H | -1.20100200 | 5.47031600  | -1.45860800 |
| H | 1.71912000  | 2.26359400  | -5.45663500 |
| H | -0.48568900 | 3.41851300  | -5.66539700 |
| H | -1.40597800 | 4.66980400  | -3.75548500 |
| H | -1.04720900 | 0.84547500  | 1.69024900  |
| C | -7.15633100 | -1.93307800 | 0.45170600  |
| C | -6.98943700 | -0.68322300 | 0.99403200  |
| C | -5.70122100 | -0.18725100 | 1.30581900  |
| C | -4.55412300 | -0.99055600 | 1.05450700  |
| C | -4.76441700 | -2.30221000 | 0.54431700  |
| C | -6.02613200 | -2.75288200 | 0.23789100  |
| H | -6.37966500 | 1.71353100  | 2.08580700  |
| H | -8.14654300 | -2.29807900 | 0.20148400  |
| H | -7.84892200 | -0.04650900 | 1.18756000  |
| C | -5.50722800 | 1.10321700  | 1.86788200  |
| C | -3.24975100 | -0.47002700 | 1.30271100  |
| H | -3.91703000 | -2.96860500 | 0.41340700  |
| H | -6.15275700 | -3.75242500 | -0.16702800 |
| C | -3.09139900 | 0.81833000  | 1.82901000  |
| C | -4.26061700 | 1.58476300  | 2.13781600  |
| H | -4.14244200 | 2.56529000  | 2.58489200  |
| C | -2.05989200 | -1.23392600 | 0.85414600  |
| C | -1.03435900 | -1.63033700 | 1.62272600  |
| C | -0.92079000 | -1.45732400 | 3.08169800  |
| C | -1.98796900 | -1.68023300 | 3.95895700  |
| C | 0.31942700  | -1.06099200 | 3.59972600  |
| C | -1.81533600 | -1.50893800 | 5.32856900  |
| H | -2.94661000 | -1.99931000 | 3.56185400  |
| C | 0.48429100  | -0.88050200 | 4.96878000  |
| H | 1.15194100  | -0.89706100 | 2.91858300  |
| C | -0.58064600 | -1.10896600 | 5.83741800  |
| H | 1.45052000  | -0.57307500 | 5.35631200  |
| H | -0.44883600 | -0.98094300 | 6.90749700  |
| N | -1.85567700 | 1.36356500  | 2.01153400  |
| C | -1.61627300 | 2.76069300  | 2.28048400  |
| H | -0.56956600 | 2.94469800  | 2.01176900  |
| H | -2.22388700 | 3.40226500  | 1.62461700  |
| C | -1.84330500 | 3.15072100  | 3.72939500  |
| C | -1.61700800 | 2.22484600  | 4.74800800  |

|   |             |             |             |
|---|-------------|-------------|-------------|
| C | -2.26326200 | 4.43896800  | 4.06233100  |
| C | -1.79054300 | 2.58969600  | 6.07884700  |
| H | -1.31403500 | 1.21479600  | 4.48544500  |
| C | -2.43538200 | 4.80598500  | 5.39461900  |
| H | -2.46139400 | 5.15625800  | 3.26852000  |
| C | -2.19614300 | 3.88116200  | 6.40731300  |
| H | -1.61230000 | 1.85701400  | 6.86050200  |
| H | -2.76638500 | 5.81027500  | 5.64096600  |
| H | -2.33486800 | 4.16326500  | 7.44624500  |
| H | -0.16157500 | -2.07016000 | 1.14112100  |
| C | -2.55013900 | 1.79220200  | -2.11762400 |
| C | -3.47299000 | 1.49874000  | -3.12328400 |
| C | -3.95316900 | 0.21117000  | -3.26852600 |
| C | -3.48961800 | -0.81968800 | -2.43474500 |
| C | -2.52624600 | -0.53092000 | -1.44504400 |
| C | -2.08718600 | 0.79070800  | -1.28773700 |
| H | -2.18583400 | 2.80586000  | -1.98891600 |
| H | -4.68962100 | 0.00248500  | -4.03585900 |
| H | -1.36396000 | 1.02621100  | -0.51216700 |
| N | -1.96844700 | -1.50489900 | -0.58260100 |
| H | -2.21195900 | -2.46031700 | -0.84499700 |
| H | -0.38684400 | -1.29139000 | -0.88910000 |
| C | -3.89632100 | 2.57897300  | -4.07243400 |
| F | -3.04102500 | 2.70722100  | -5.10158400 |
| F | -5.10440500 | 2.33889400  | -4.59990400 |
| F | -3.94568500 | 3.77671500  | -3.46625200 |
| C | -4.03983300 | -2.17973100 | -2.57251900 |
| O | -3.48052700 | -3.19780700 | -2.22696300 |
| C | -5.44809300 | -2.32651900 | -3.19646400 |
| F | -5.38024800 | -2.14323400 | -4.52703200 |
| F | -5.93018900 | -3.54121700 | -2.97251700 |
| H | -2.64727600 | -1.69144100 | 6.00134200  |
| F | -6.30088800 | -1.42873900 | -2.70319900 |

#### IM3-IV'

|   |            |             |             |
|---|------------|-------------|-------------|
| P | 1.50434500 | -0.12442500 | -0.48963200 |
| O | 2.19337000 | -1.01131400 | 0.68664800  |
| O | 2.72517600 | 0.08883200  | -1.51973900 |
| O | 0.91675200 | 1.09754800  | 0.09143300  |
| C | 2.98696700 | -2.08198800 | 0.29242900  |
| C | 4.25362800 | -1.81998700 | -0.23508500 |
| C | 2.49401000 | -3.37643500 | 0.45550500  |
| C | 3.31322000 | -4.42180700 | 0.03665600  |
| C | 4.55491200 | -4.20442300 | -0.56155200 |

|   |             |             |             |
|---|-------------|-------------|-------------|
| H | 2.95733700  | -5.44154800 | 0.16555900  |
| C | 3.91008100  | 0.53811100  | -0.94416300 |
| C | 4.71295500  | -0.40115300 | -0.28711100 |
| C | 4.23651400  | 1.88782100  | -1.04415000 |
| C | 5.42886200  | 2.29860900  | -0.44105100 |
| C | 6.22798200  | 1.40975800  | 0.26826300  |
| H | 5.71606200  | 3.34446000  | -0.51479900 |
| C | 5.86942600  | 0.05577400  | 0.36199000  |
| C | 6.73378500  | -0.79729300 | 1.25973900  |
| C | 8.24786400  | -0.61281500 | 1.00880000  |
| H | 8.58775800  | -1.32723900 | 0.25213900  |
| C | 8.61603400  | 0.81857700  | 0.56746500  |
| H | 8.74636400  | 0.84913000  | -0.51921200 |
| C | 7.51544200  | 1.82464800  | 0.93264100  |
| H | 7.38801200  | 1.84674000  | 2.02399400  |
| H | 6.51737000  | -0.48401500 | 2.28989200  |
| C | 5.02822300  | -2.89284700 | -0.71879400 |
| C | 6.30942600  | -2.62912600 | -1.48738400 |
| C | 7.23815400  | -3.83870600 | -1.53563100 |
| H | 7.65562100  | -4.02558600 | -0.53684400 |
| C | 6.46627600  | -5.06970200 | -2.00095400 |
| H | 7.13204900  | -5.92819300 | -2.12854800 |
| C | 5.37168500  | -5.40797800 | -0.99255600 |
| H | 5.83486200  | -5.84625300 | -0.09813500 |
| H | 6.02651800  | -2.35405600 | -2.51359300 |
| H | 7.79357600  | 2.83653200  | 0.62509500  |
| H | 9.56987000  | 1.11988000  | 1.00913600  |
| H | 8.77634500  | -0.87200000 | 1.93088100  |
| H | 6.45895200  | -1.85251300 | 1.20257800  |
| H | 6.83115200  | -1.75882400 | -1.08748400 |
| H | 8.08097300  | -3.62945100 | -2.20118100 |
| H | 6.01767500  | -4.86199200 | -2.98042400 |
| H | 4.70084700  | -6.17462300 | -1.39366000 |
| O | 0.57860200  | -1.08689800 | -1.29598300 |
| C | 1.82622400  | -2.64154300 | 4.61792000  |
| C | 2.03332200  | -2.86676800 | 3.29034900  |
| C | 0.98771500  | -3.38636300 | 2.45872000  |
| C | -0.27724300 | -3.67951200 | 3.07287600  |
| C | -0.46174100 | -3.39550900 | 4.46378600  |
| C | 0.55645900  | -2.89602600 | 5.21529700  |
| C | 1.16922000  | -3.64213100 | 1.08378600  |
| C | -1.29194800 | -4.26162400 | 2.31424300  |
| C | -1.10527600 | -4.57235900 | 0.96686800  |
| C | 0.13133900  | -4.22059100 | 0.32408400  |

|   |             |             |             |
|---|-------------|-------------|-------------|
| C | 0.25729000  | -4.48464300 | -1.08027400 |
| H | 1.15162700  | -4.15052600 | -1.59411200 |
| C | -0.72524900 | -5.13943400 | -1.76370000 |
| C | -1.91422500 | -5.56598900 | -1.10086000 |
| C | -2.10850100 | -5.26450100 | 0.21452600  |
| H | 2.63239300  | -2.25040600 | 5.23061400  |
| H | 3.00248600  | -2.66166300 | 2.84883700  |
| H | -1.43538100 | -3.59160600 | 4.90352000  |
| H | 0.40644800  | -2.68086400 | 6.26794500  |
| H | -2.23765800 | -4.50795600 | 2.79185700  |
| H | -0.60639700 | -5.33706900 | -2.82382600 |
| H | -2.66740800 | -6.11767100 | -1.65533600 |
| H | -3.02267900 | -5.55644400 | 0.72475400  |
| C | 2.24020500  | 5.03875300  | 1.05915700  |
| C | 2.79882200  | 3.98710400  | 0.39526800  |
| C | 2.75348700  | 3.90613500  | -1.03730700 |
| C | 2.02960500  | 4.92598500  | -1.74445600 |
| C | 1.47079300  | 6.02125300  | -1.00969500 |
| C | 1.59074000  | 6.08989600  | 0.34467100  |
| C | 3.36808300  | 2.86453300  | -1.76032200 |
| C | 1.89142700  | 4.83622700  | -3.12789900 |
| C | 2.45278000  | 3.78242600  | -3.84840600 |
| C | 3.21943500  | 2.78256400  | -3.15998900 |
| C | 3.81931000  | 1.74306800  | -3.94198900 |
| H | 4.41631600  | 0.98789600  | -3.44280500 |
| C | 3.64958400  | 1.69050400  | -5.29333100 |
| C | 2.87392200  | 2.67580200  | -5.97040200 |
| C | 2.29888500  | 3.69001700  | -5.26750900 |
| H | 2.26295300  | 5.07315600  | 2.14381600  |
| H | 3.26804300  | 3.18101800  | 0.94791900  |
| H | 0.95097600  | 6.79810500  | -1.56397100 |
| H | 1.16807800  | 6.92308100  | 0.89576600  |
| H | 1.33469000  | 5.60561900  | -3.65807900 |
| H | 4.10974500  | 0.89038100  | -5.86404700 |
| H | 2.74934800  | 2.61405000  | -7.04658800 |
| H | 1.71029900  | 4.45238400  | -5.77026500 |
| H | -0.83360200 | 1.80187700  | 0.55182200  |
| C | -7.17819400 | -0.40696100 | 1.68483700  |
| C | -6.83907300 | 0.92165800  | 1.67089700  |
| C | -5.50213100 | 1.33208500  | 1.44529200  |
| C | -4.49127500 | 0.35134200  | 1.23796300  |
| C | -4.86898100 | -1.02118000 | 1.28368800  |
| C | -6.17593100 | -1.38564700 | 1.48877100  |
| H | -5.91237600 | 3.45276900  | 1.52008500  |



|   |             |             |             |
|---|-------------|-------------|-------------|
| H | -8.20714400 | -0.71080700 | 1.84432100  |
| H | -7.59668500 | 1.68684600  | 1.81939000  |
| C | -5.14146400 | 2.70273700  | 1.36436000  |
| C | -3.16004900 | 0.77003600  | 0.96020300  |
| H | -4.10423100 | -1.78102500 | 1.14667600  |
| H | -6.44484000 | -2.43765600 | 1.49611200  |
| C | -2.83906000 | 2.12617300  | 0.86536900  |
| C | -3.86296800 | 3.09640600  | 1.08574300  |
| H | -3.61699900 | 4.15090100  | 1.03899200  |
| C | -2.08455400 | -0.19040700 | 0.60401000  |
| C | -1.21959000 | -0.76316000 | 1.44431800  |
| C | -1.13410700 | -0.43950100 | 2.88456800  |
| C | -2.23121900 | -0.46681700 | 3.75119800  |
| C | 0.11157700  | -0.02079700 | 3.36662300  |
| C | -2.08580800 | -0.06598400 | 5.07486000  |
| H | -3.19602800 | -0.80396600 | 3.38537400  |
| C | 0.24759200  | 0.39528100  | 4.68789400  |
| H | 0.96310600  | -0.00487700 | 2.69073700  |
| C | -0.85030000 | 0.37409900  | 5.54448700  |
| H | 1.21621800  | 0.72902000  | 5.04830800  |
| H | -0.74342500 | 0.69522100  | 6.57614900  |
| N | -1.57538900 | 2.49389500  | 0.48989600  |
| C | -1.11161000 | 3.86051700  | 0.47054200  |
| H | -0.11490500 | 3.83655900  | 0.01493500  |
| H | -1.74467200 | 4.46688600  | -0.18915900 |
| C | -1.01520300 | 4.50398300  | 1.84257100  |
| C | -0.62776200 | 3.74607400  | 2.94929900  |
| C | -1.26865300 | 5.86528200  | 2.01054800  |
| C | -0.48119300 | 4.34420600  | 4.19637300  |
| H | -0.44495300 | 2.68056100  | 2.83331400  |
| C | -1.11756600 | 6.46799500  | 3.25718000  |
| H | -1.58106000 | 6.45846700  | 1.15338000  |
| C | -0.71971700 | 5.70795600  | 4.35348900  |
| H | -0.18443800 | 3.73802000  | 5.04701400  |
| H | -1.31899000 | 7.52853400  | 3.37369000  |
| H | -0.60638100 | 6.17412500  | 5.32711700  |
| H | -0.42915000 | -1.39777500 | 1.04310000  |
| C | -4.18773100 | -3.01683800 | -1.82086300 |
| C | -5.25709900 | -2.29950100 | -2.35820800 |
| C | -5.19302300 | -0.92205500 | -2.47853500 |
| C | -4.05264300 | -0.23095400 | -2.04814000 |
| C | -2.99076900 | -0.95524300 | -1.47530400 |
| C | -3.06212000 | -2.34378700 | -1.38067500 |
| H | -4.24128500 | -4.09761100 | -1.73858200 |

|   |             |             |             |
|---|-------------|-------------|-------------|
| H | -6.03242300 | -0.38807200 | -2.90763700 |
| H | -2.22679200 | -2.87611200 | -0.93579500 |
| N | -1.87060200 | -0.32426300 | -0.85126600 |
| H | -1.77701400 | 0.63176100  | -1.21298200 |
| H | -0.42879000 | -0.87369300 | -1.16173700 |
| C | -6.50097900 | -3.04462300 | -2.74383100 |
| F | -7.17026900 | -3.46673600 | -1.65970300 |
| F | -7.34043300 | -2.28968900 | -3.46315100 |
| F | -6.21361600 | -4.13791900 | -3.46704900 |
| C | -3.97772200 | 1.24608000  | -2.17413800 |
| O | -2.95208200 | 1.88508100  | -2.23171300 |
| C | -5.30767700 | 2.02544300  | -2.29272400 |
| F | -6.22422100 | 1.58195900  | -1.43099200 |
| F | -5.11317500 | 3.31796600  | -2.08582600 |
| H | -2.94360300 | -0.08942500 | 5.73938600  |
| F | -5.80606300 | 1.86655500  | -3.53275800 |

**IM4d**

|   |             |             |             |
|---|-------------|-------------|-------------|
| C | -5.23260600 | -0.91963100 | 3.15898300  |
| C | -5.43048800 | -1.56598400 | 1.96624600  |
| C | -4.49036200 | -1.45124400 | 0.91298300  |
| C | -3.32621900 | -0.65215900 | 1.09062900  |
| C | -3.14884000 | 0.00407000  | 2.33828700  |
| C | -4.07647900 | -0.12871500 | 3.34089900  |
| H | -5.57963800 | -2.71532400 | -0.46402600 |
| H | -5.95802700 | -1.01116800 | 3.96042100  |
| H | -6.31404500 | -2.17854600 | 1.80788300  |
| C | -4.68242000 | -2.11771100 | -0.32744000 |
| C | -2.37540800 | -0.56249500 | 0.02380300  |
| H | -2.27075000 | 0.62269500  | 2.48722800  |
| H | -3.92204000 | 0.38463400  | 4.28465600  |
| C | -2.60328000 | -1.20925100 | -1.18191700 |
| C | -3.78133100 | -1.99542800 | -1.34414400 |
| H | -3.96948900 | -2.46872900 | -2.30222000 |
| C | -1.08142800 | 0.15447400  | 0.23325100  |
| C | -0.94441900 | 1.48894800  | 0.33076300  |
| H | 0.02475900  | 1.89539200  | 0.61724200  |
| C | -2.01830500 | 2.47731800  | 0.14266300  |
| C | -2.05922600 | 3.60156600  | 0.97767100  |
| C | -2.98709400 | 2.35524300  | -0.86235100 |
| C | -3.05688400 | 4.55872200  | 0.83821600  |
| H | -1.30249400 | 3.71516800  | 1.74966500  |
| C | -3.98511100 | 3.31265600  | -0.99905800 |
| H | -2.93898000 | 1.51789600  | -1.55156100 |

|   |             |             |             |
|---|-------------|-------------|-------------|
| C | -4.02852900 | 4.41408500  | -0.14807800 |
| H | -3.07537700 | 5.41869000  | 1.50022300  |
| H | -4.72677400 | 3.20284400  | -1.78390300 |
| H | -4.80803900 | 5.16065000  | -0.26048200 |
| N | -1.74691700 | -1.03119000 | -2.27008600 |
| C | -1.21256900 | -2.21828800 | -2.94360500 |
| H | -0.73816300 | -1.88480300 | -3.87052200 |
| H | -2.03929400 | -2.87693300 | -3.22198300 |
| H | -0.99049200 | -0.38481000 | -2.06095800 |
| N | -0.01795600 | -0.75582800 | 0.38287200  |
| C | 1.32379400  | -0.51575400 | 0.60826200  |
| C | 1.95807200  | -1.29648600 | 1.59721700  |
| C | 2.10368600  | 0.43413900  | -0.09361800 |
| C | 3.28813700  | -1.12341800 | 1.90678600  |
| H | 1.36513700  | -2.03488200 | 2.12772200  |
| C | 3.44765500  | 0.62987100  | 0.26898900  |
| C | 4.03671800  | -0.13822100 | 1.25144600  |
| H | 3.75274300  | -1.73261200 | 2.67608200  |
| H | 4.04933900  | 1.36580300  | -0.25057400 |
| C | 1.60543000  | 1.11157500  | -1.30783800 |
| O | 0.74796300  | 0.69231600  | -2.04845200 |
| C | 2.23117900  | 2.48079000  | -1.67100200 |
| F | 1.48177400  | 3.11222400  | -2.55944200 |
| F | 3.46000000  | 2.33093700  | -2.19197700 |
| F | 2.33963400  | 3.24689700  | -0.57874100 |
| H | -0.32231500 | -1.68595900 | 0.64697100  |
| C | -0.21396900 | -2.95076100 | -2.07447900 |
| C | -0.65234000 | -3.82841300 | -1.07861800 |
| C | 1.14832400  | -2.65647900 | -2.16406100 |
| C | 0.25483900  | -4.39374700 | -0.18395000 |
| H | -1.71104300 | -4.06280100 | -0.99885900 |
| C | 2.05795000  | -3.22707300 | -1.27901900 |
| H | 1.49325800  | -1.96226800 | -2.92612700 |
| C | 1.61202200  | -4.09346100 | -0.28341200 |
| H | -0.09700900 | -5.07683900 | 0.58304800  |
| H | 3.11376200  | -2.98484200 | -1.35485000 |
| H | 2.32030400  | -4.53385600 | 0.41148300  |
| C | 5.47270500  | 0.05237800  | 1.63328900  |
| F | 6.16975900  | -1.08708000 | 1.49583400  |
| F | 6.07383100  | 0.98669200  | 0.88587200  |
| F | 5.59676400  | 0.42083300  | 2.91787800  |

**IM5d**

|   |            |            |             |
|---|------------|------------|-------------|
| P | 1.10898000 | 0.20313600 | -0.39516700 |
|---|------------|------------|-------------|

|   |             |             |             |
|---|-------------|-------------|-------------|
| O | 1.87599400  | 1.47610700  | -1.02092300 |
| O | 2.30264200  | -0.79557000 | 0.02182100  |
| O | 0.09431500  | -0.29511400 | -1.33535400 |
| C | 2.90318100  | 1.98581300  | -0.23260300 |
| C | 4.10985200  | 1.29111600  | -0.20179800 |
| C | 2.65772400  | 3.13701600  | 0.51533000  |
| C | 3.69164100  | 3.57560600  | 1.33605100  |
| C | 4.89658700  | 2.87559700  | 1.45505200  |
| H | 3.54143300  | 4.47689900  | 1.92591400  |
| C | 3.32602200  | -0.95721300 | -0.90575700 |
| C | 4.24482700  | 0.08055000  | -1.07025600 |
| C | 3.39362600  | -2.15385900 | -1.61702500 |
| C | 4.41364600  | -2.26795500 | -2.55636300 |
| C | 5.30484300  | -1.22412200 | -2.81841200 |
| H | 4.50025700  | -3.19467600 | -3.11868000 |
| C | 5.21546600  | -0.03033600 | -2.08538500 |
| C | 6.07474300  | 1.16539500  | -2.45453700 |
| C | 7.32819500  | 0.78477800  | -3.23731800 |
| H | 8.03341400  | 0.26289400  | -2.57676300 |
| C | 6.96001200  | -0.12490700 | -4.40531100 |
| H | 7.83291600  | -0.33737000 | -5.02933100 |
| C | 6.36797200  | -1.43013900 | -3.88056700 |
| H | 5.94818200  | -2.02101400 | -4.70093400 |
| H | 5.45587800  | 1.83293700  | -3.07109900 |
| C | 5.10873700  | 1.71223900  | 0.69892600  |
| C | 6.33704800  | 0.85187700  | 0.93505300  |
| C | 7.48413200  | 1.60983000  | 1.59766600  |
| H | 7.91708100  | 2.32402600  | 0.88462000  |
| C | 6.97620900  | 2.36326600  | 2.82303800  |
| H | 7.80043900  | 2.84123100  | 3.36040800  |
| C | 5.95482800  | 3.41457400  | 2.39854300  |
| H | 6.47929700  | 4.23834300  | 1.89549400  |
| H | 6.03150000  | 0.02131400  | 1.58734900  |
| H | 7.17387500  | -2.03823600 | -3.44767100 |
| H | 6.22628900  | 0.38586200  | -5.04131200 |
| H | 7.83057100  | 1.69055000  | -3.58911500 |
| H | 6.33629200  | 1.74827000  | -1.56893100 |
| H | 6.67220900  | 0.38399500  | 0.00680200  |
| H | 8.27847500  | 0.90864700  | 1.86968600  |
| H | 6.50950500  | 1.65157600  | 3.51544500  |
| H | 5.46665700  | 3.85420600  | 3.27422700  |
| O | 0.64869900  | 0.61474900  | 1.05356600  |
| H | -0.28869200 | 0.89063700  | 1.13574600  |
| C | 1.70467400  | 5.37933200  | -2.98731400 |

|   |             |             |             |
|---|-------------|-------------|-------------|
| C | 2.00307400  | 4.66886300  | -1.86282700 |
| C | 1.07327800  | 4.57799400  | -0.77631900 |
| C | -0.18122400 | 5.26350900  | -0.90762100 |
| C | -0.45255600 | 6.00327600  | -2.10201800 |
| C | 0.45818200  | 6.05884100  | -3.11315100 |
| C | 1.35012300  | 3.84909700  | 0.39948900  |
| C | -1.12413800 | 5.18033200  | 0.11715000  |
| C | -0.87036800 | 4.44629900  | 1.27510200  |
| C | 0.39436800  | 3.77886600  | 1.43384200  |
| C | 0.60992600  | 3.03314400  | 2.64137800  |
| H | 1.55302000  | 2.51364200  | 2.77054800  |
| C | -0.36234100 | 2.94114400  | 3.59357700  |
| C | -1.62119000 | 3.59282200  | 3.42401700  |
| C | -1.86154000 | 4.32377900  | 2.30131300  |
| H | 2.42398900  | 5.43245100  | -3.79817100 |
| H | 2.95920000  | 4.16363400  | -1.77941200 |
| H | -1.40958400 | 6.51147200  | -2.17884700 |
| H | 0.24296700  | 6.62124300  | -4.01588600 |
| H | -2.08827700 | 5.67146100  | -0.00460800 |
| H | -0.18109300 | 2.36133700  | 4.49372500  |
| H | -2.38386100 | 3.49100600  | 4.18883500  |
| H | -2.81611400 | 4.81922400  | 2.14695600  |
| C | -0.32881600 | -2.64014900 | -3.73626900 |
| C | 0.86706400  | -2.50701400 | -3.09506100 |
| C | 1.26901600  | -3.43902400 | -2.08386800 |
| C | 0.39453600  | -4.54648400 | -1.79858000 |
| C | -0.84508000 | -4.65492600 | -2.50598400 |
| C | -1.20283500 | -3.72748200 | -3.43802100 |
| C | 2.45182600  | -3.27995300 | -1.33545000 |
| C | 0.74498500  | -5.45987400 | -0.80298800 |
| C | 1.90017000  | -5.29520300 | -0.03717900 |
| C | 2.76714600  | -4.17887900 | -0.29694600 |
| C | 3.91705900  | -4.00918100 | 0.54208200  |
| H | 4.57887200  | -3.16941200 | 0.35841200  |
| C | 4.17747300  | -4.87562000 | 1.56272200  |
| C | 3.31557300  | -5.98314700 | 1.81669900  |
| C | 2.21609300  | -6.18563800 | 1.03769700  |
| H | -0.63627700 | -1.89812600 | -4.46560900 |
| H | 1.50981500  | -1.66037000 | -3.30918300 |
| H | -1.50817900 | -5.48133000 | -2.26570700 |
| H | -2.15941100 | -3.80570700 | -3.94727500 |
| H | 0.08118800  | -6.29497900 | -0.59134000 |
| H | 5.04766500  | -4.72299400 | 2.19261800  |
| H | 3.53944100  | -6.65934700 | 2.63504200  |

|   |             |             |             |
|---|-------------|-------------|-------------|
| H | 1.54910200  | -7.02266800 | 1.22397100  |
| C | -5.10452300 | -4.14895200 | -4.11533100 |
| C | -4.88058200 | -2.87047800 | -4.55665000 |
| C | -4.35631900 | -1.87939100 | -3.68762600 |
| C | -4.06030500 | -2.21577800 | -2.33434000 |
| C | -4.32000600 | -3.54727200 | -1.90169900 |
| C | -4.82198300 | -4.48332100 | -2.76860200 |
| H | -4.36865100 | -0.29032400 | -5.15170800 |
| H | -5.50072300 | -4.90178400 | -4.78857600 |
| H | -5.09709000 | -2.59464200 | -5.58554700 |
| C | -4.10724100 | -0.55573900 | -4.13073000 |
| C | -3.48905000 | -1.22954300 | -1.48447300 |
| H | -4.10588200 | -3.81375500 | -0.87199400 |
| H | -5.00644800 | -5.49453600 | -2.41890400 |
| C | -3.18083300 | 0.03697900  | -1.97596700 |
| C | -3.54335500 | 0.37967500  | -3.30813000 |
| H | -3.37411500 | 1.38990200  | -3.66392100 |
| C | -3.15711700 | -1.56667500 | -0.06698900 |
| C | -4.05927600 | -1.67637700 | 0.93264300  |
| N | -2.59274700 | 0.94652600  | -1.12462000 |
| C | -2.09071200 | 2.23146600  | -1.56101700 |
| H | -1.63335200 | 2.18642200  | -2.55891700 |
| H | -1.28256400 | 2.51016000  | -0.87004100 |
| H | -2.00840400 | 0.50264600  | -0.43368100 |
| N | -1.79535600 | -1.80190100 | 0.12367500  |
| C | -1.09486700 | -1.91537300 | 1.31731700  |
| C | 0.00949900  | -2.77338900 | 1.35759600  |
| C | -1.39648300 | -1.16292500 | 2.47404700  |
| C | 0.77172700  | -2.90929700 | 2.50551900  |
| H | 0.25341700  | -3.33862000 | 0.46711100  |
| C | -0.66028100 | -1.34160200 | 3.64388700  |
| C | 0.41797900  | -2.21737300 | 3.66271800  |
| H | 1.62898400  | -3.57841500 | 2.50431700  |
| H | -0.90261800 | -0.76382200 | 4.53028200  |
| C | -2.25915600 | 0.04410300  | 2.39567400  |
| O | -2.03192500 | 0.96150200  | 1.63391200  |
| C | -3.36031000 | 0.27520400  | 3.44772800  |
| F | -4.28436200 | 1.10672500  | 2.99587000  |
| F | -2.77959100 | 0.83198200  | 4.52944500  |
| F | -3.93681400 | -0.85762700 | 3.84409100  |
| H | -1.24301900 | -1.92134400 | -0.72124800 |
| C | -3.15567000 | 3.30599800  | -1.49842100 |
| C | -3.28741700 | 4.25907100  | -2.50494100 |
| C | -3.98005400 | 3.38450800  | -0.37092600 |

|   |             |             |             |
|---|-------------|-------------|-------------|
| C | -4.21970200 | 5.29016400  | -2.38654600 |
| H | -2.64344800 | 4.20491400  | -3.37998100 |
| C | -4.91118000 | 4.41011000  | -0.25258400 |
| H | -3.86842600 | 2.64126100  | 0.41557100  |
| C | -5.03044400 | 5.36977500  | -1.25890400 |
| H | -4.31443900 | 6.02690600  | -3.17863200 |
| H | -5.54522200 | 4.46388300  | 0.62750200  |
| H | -5.75795500 | 6.16986800  | -1.16629100 |
| C | 1.25537800  | -2.36583300 | 4.89558700  |
| F | 2.40803200  | -1.68412000 | 4.80415200  |
| F | 0.61897900  | -1.91623600 | 5.98840700  |
| F | 1.58585000  | -3.64733700 | 5.11670100  |
| C | -5.46743800 | -1.25886300 | 0.87189300  |
| C | -6.44490900 | -2.00338600 | 1.54392600  |
| C | -5.85497500 | -0.07891400 | 0.22039700  |
| C | -7.77662600 | -1.60515200 | 1.53244300  |
| H | -6.15193900 | -2.90670600 | 2.07265800  |
| C | -7.18688300 | 0.31603700  | 0.20824100  |
| H | -5.09724100 | 0.54182400  | -0.24877700 |
| C | -8.15419400 | -0.44679900 | 0.85841100  |
| H | -8.52124500 | -2.19947100 | 2.05291000  |
| H | -7.46488000 | 1.23493900  | -0.29901500 |
| H | -9.19329100 | -0.13345500 | 0.85191600  |
| H | -3.73284800 | -2.12684100 | 1.86728000  |

### TS3d

Value of imaginary frequency = -259.27 cm<sup>-1</sup>

|   |            |             |             |
|---|------------|-------------|-------------|
| P | 1.01917600 | 0.20822600  | -0.30901900 |
| O | 1.69342600 | 1.51733000  | -0.97618500 |
| O | 2.29412900 | -0.70437400 | 0.09351900  |
| O | 0.05629700 | -0.39384800 | -1.24914300 |
| C | 2.69043100 | 2.11606400  | -0.21420500 |
| C | 3.94198300 | 1.50567000  | -0.17737700 |
| C | 2.38470600 | 3.27646600  | 0.49641100  |
| C | 3.39518400 | 3.80329000  | 1.29374000  |
| C | 4.64122100 | 3.18274600  | 1.42570400  |
| H | 3.19350300 | 4.71322900  | 1.85430100  |
| C | 3.31375300 | -0.80259400 | -0.84359700 |
| C | 4.15581400 | 0.29598400  | -1.02911700 |
| C | 3.46648800 | -1.99612300 | -1.54816200 |
| C | 4.48431200 | -2.04338900 | -2.49601800 |
| C | 5.29442500 | -0.94100700 | -2.77655800 |
| H | 4.63199800 | -2.96635300 | -3.05187400 |
| C | 5.12319300 | 0.24876700  | -2.05234000 |

|   |             |             |             |
|---|-------------|-------------|-------------|
| C | 5.88858000  | 1.50155700  | -2.44006200 |
| C | 7.15541400  | 1.20886200  | -3.23922100 |
| H | 7.90742000  | 0.74744600  | -2.58525900 |
| C | 6.84090300  | 0.26338000  | -4.39420200 |
| H | 7.71840700  | 0.11235300  | -5.02965400 |
| C | 6.35793600  | -1.07779400 | -3.84912100 |
| H | 5.97520000  | -1.70826400 | -4.65811400 |
| H | 5.21410300  | 2.11918300  | -3.05039200 |
| C | 4.92018800  | 2.01467500  | 0.70031300  |
| C | 6.20576100  | 1.24447300  | 0.94279500  |
| C | 7.30736100  | 2.09676100  | 1.56661300  |
| H | 7.67968200  | 2.81942000  | 0.82816700  |
| C | 6.76597500  | 2.84660700  | 2.77978500  |
| H | 7.56289700  | 3.39315000  | 3.29257700  |
| C | 5.66968200  | 3.81489000  | 2.34418500  |
| H | 6.13063900  | 4.66130700  | 1.81700300  |
| H | 5.96553000  | 0.41471100  | 1.62275000  |
| H | 7.21370400  | -1.61692600 | -3.42049700 |
| H | 6.06092700  | 0.71055500  | -5.02307900 |
| H | 7.58309100  | 2.14676300  | -3.60544700 |
| H | 6.12048100  | 2.10710700  | -1.56157800 |
| H | 6.55952800  | 0.77342400  | 0.02301600  |
| H | 8.15221400  | 1.45960500  | 1.84418200  |
| H | 6.35793200  | 2.12340500  | 3.49688300  |
| H | 5.16154000  | 4.23969100  | 3.21587000  |
| O | 0.52788600  | 0.61612700  | 1.11304000  |
| H | -0.47300200 | 0.72738500  | 1.24540700  |
| C | 1.34053800  | 5.41482100  | -3.04433300 |
| C | 1.66746100  | 4.73498700  | -1.90869400 |
| C | 0.74020100  | 4.61933700  | -0.82242700 |
| C | -0.54258600 | 5.24761600  | -0.96472800 |
| C | -0.84384000 | 5.95617900  | -2.17067900 |
| C | 0.06537500  | 6.03636200  | -3.18186500 |
| C | 1.04375300  | 3.91795500  | 0.36327400  |
| C | -1.48383600 | 5.13353600  | 0.05890200  |
| C | -1.20511000 | 4.41727600  | 1.22210500  |
| C | 0.08821500  | 3.81152300  | 1.39297100  |
| C | 0.33510300  | 3.08682300  | 2.60650700  |
| H | 1.30325400  | 2.61872400  | 2.74491000  |
| C | -0.64037000 | 2.94211700  | 3.54702300  |
| C | -1.93154100 | 3.52105600  | 3.36103500  |
| C | -2.19776700 | 4.24434500  | 2.23971900  |
| H | 2.05813100  | 5.48684600  | -3.85533200 |
| H | 2.64398000  | 4.27177600  | -1.81642100 |



|   |             |             |             |
|---|-------------|-------------|-------------|
| H | -1.82281100 | 6.41927400  | -2.25754200 |
| H | -0.17348600 | 6.57407900  | -4.09374400 |
| H | -2.46808000 | 5.58039500  | -0.07166800 |
| H | -0.44004700 | 2.37150700  | 4.44847800  |
| H | -2.69779700 | 3.37036400  | 4.11410000  |
| H | -3.17504600 | 4.69078200  | 2.07765900  |
| C | -0.21425800 | -2.74997000 | -3.65495900 |
| C | 0.96442100  | -2.52350900 | -3.00755300 |
| C | 1.45331100  | -3.44322000 | -2.02366200 |
| C | 0.68939700  | -4.63799000 | -1.77496000 |
| C | -0.53549000 | -4.84147000 | -2.48676700 |
| C | -0.98051500 | -3.92397500 | -3.39072200 |
| C | 2.61930000  | -3.19607500 | -1.27250900 |
| C | 1.13047800  | -5.54692300 | -0.81157800 |
| C | 2.26716200  | -5.29662000 | -0.04115600 |
| C | 3.02256900  | -4.09413400 | -0.26433300 |
| C | 4.15509600  | -3.84282400 | 0.57767200  |
| H | 4.73091900  | -2.93687000 | 0.42111800  |
| C | 4.50157600  | -4.71370900 | 1.56842700  |
| C | 3.75069200  | -5.90675500 | 1.78589200  |
| C | 2.67200600  | -6.18803300 | 1.00267900  |
| H | -0.58959300 | -2.01937800 | -4.36390400 |
| H | 1.52333600  | -1.61363600 | -3.19385900 |
| H | -1.11570200 | -5.73499300 | -2.27368700 |
| H | -1.92554700 | -4.07692400 | -3.90442300 |
| H | 0.55272900  | -6.45016700 | -0.62940300 |
| H | 5.35587200  | -4.49959000 | 2.20216400  |
| H | 4.04301400  | -6.58580800 | 2.57996400  |
| H | 2.08989400  | -7.09143700 | 1.16133500  |
| C | -4.80622600 | -4.55627800 | -3.93654900 |
| C | -4.66083000 | -3.28670400 | -4.43681300 |
| C | -4.18080500 | -2.23184100 | -3.62152300 |
| C | -3.84160600 | -2.49471500 | -2.26385100 |
| C | -4.01605600 | -3.81691300 | -1.76831000 |
| C | -4.48328500 | -4.81596500 | -2.58370900 |
| H | -4.30604000 | -0.70325900 | -5.14516200 |
| H | -5.17211200 | -5.35789400 | -4.56907600 |
| H | -4.91046200 | -3.06878400 | -5.47198200 |
| C | -4.01863200 | -0.91102200 | -4.11792400 |
| C | -3.32244200 | -1.43935000 | -1.46817700 |
| H | -3.76694700 | -4.03327300 | -0.73351400 |
| H | -4.60738000 | -5.81881400 | -2.18692900 |
| C | -3.12252000 | -0.16457600 | -1.99335200 |
| C | -3.51799400 | 0.09321800  | -3.33942300 |

|   |             |             |             |
|---|-------------|-------------|-------------|
| H | -3.42632500 | 1.09886300  | -3.73418400 |
| C | -2.92305800 | -1.72877600 | -0.06012300 |
| C | -3.74150000 | -1.60208500 | 1.06788100  |
| N | -2.62479000 | 0.82032800  | -1.19039900 |
| C | -2.21760000 | 2.13320800  | -1.63969000 |
| H | -1.77507800 | 2.09705900  | -2.64288200 |
| H | -1.41635600 | 2.46629400  | -0.96595500 |
| H | -2.17447700 | 0.51574600  | -0.34035500 |
| N | -1.64659400 | -2.11733800 | 0.07934500  |
| C | -0.95591100 | -2.17853200 | 1.30526300  |
| C | 0.18579700  | -2.96827400 | 1.38080800  |
| C | -1.33908800 | -1.36768000 | 2.38583300  |
| C | 0.96257400  | -2.96503800 | 2.53036600  |
| H | 0.45626900  | -3.57849400 | 0.52944000  |
| C | -0.54735600 | -1.35954500 | 3.52894500  |
| C | 0.58286100  | -2.17058700 | 3.60607600  |
| H | 1.85524300  | -3.58266700 | 2.58266700  |
| H | -0.80595000 | -0.71811300 | 4.36340500  |
| C | -2.37842400 | -0.28956100 | 2.17578500  |
| O | -1.99486700 | 0.74282400  | 1.56982700  |
| C | -3.37574700 | -0.01158300 | 3.30689800  |
| F | -4.33985600 | 0.81172500  | 2.92093800  |
| F | -2.70429500 | 0.60097000  | 4.30746700  |
| F | -3.91745000 | -1.11611600 | 3.82781800  |
| H | -1.06311900 | -2.08084800 | -0.75837400 |
| C | -3.35091300 | 3.13633300  | -1.57794000 |
| C | -3.57645000 | 4.04500800  | -2.60795900 |
| C | -4.15170900 | 3.18881000  | -0.43169200 |
| C | -4.58348500 | 5.00451400  | -2.49790000 |
| H | -2.94803100 | 4.01462900  | -3.49532300 |
| C | -5.15920000 | 4.14056700  | -0.32304100 |
| H | -3.95971700 | 2.49052600  | 0.38099900  |
| C | -5.37550900 | 5.05455000  | -1.35559900 |
| H | -4.75095600 | 5.70775700  | -3.30805200 |
| H | -5.77502700 | 4.17313800  | 0.57098100  |
| H | -6.16190000 | 5.79769300  | -1.27008400 |
| C | 1.44845500  | -2.13071300 | 4.83148700  |
| F | 2.49807800  | -1.31167100 | 4.67156600  |
| F | 0.77236000  | -1.69782000 | 5.90634600  |
| F | 1.94426600  | -3.34219800 | 5.12474500  |
| C | -5.16025500 | -1.19607900 | 1.00833600  |
| C | -6.09385300 | -1.88464400 | 1.79206900  |
| C | -5.59983300 | -0.10225500 | 0.25143400  |
| C | -7.43337900 | -1.51321500 | 1.79762700  |

|   |             |             |             |
|---|-------------|-------------|-------------|
| H | -5.76165000 | -2.72088400 | 2.40153800  |
| C | -6.93878300 | 0.26818300  | 0.25929600  |
| H | -4.88469500 | 0.48119400  | -0.31737500 |
| C | -7.86242300 | -0.43659400 | 1.02729000  |
| H | -8.14181200 | -2.06477600 | 2.40760600  |
| H | -7.25555100 | 1.12281300  | -0.33065100 |
| H | -8.90707000 | -0.14253600 | 1.03349800  |
| H | -3.50731100 | -2.29960400 | 1.87005800  |

**IM6d**

|   |            |             |             |
|---|------------|-------------|-------------|
| P | 1.01251000 | 0.24419500  | -0.18446000 |
| O | 1.79905800 | 1.59138400  | -0.58726000 |
| O | 2.18808500 | -0.85768200 | -0.00682900 |
| O | 0.28653300 | -0.07656300 | -1.53464700 |
| C | 2.83275200 | 1.91689600  | 0.29374600  |
| C | 4.01961500 | 1.19410600  | 0.19790300  |
| C | 2.63299300 | 2.92580400  | 1.23456900  |
| C | 3.67212800 | 3.16145900  | 2.12895900  |
| C | 4.84572200 | 2.40256800  | 2.12817300  |
| H | 3.54958800 | 3.95016100  | 2.86757800  |
| C | 3.21322800 | -0.85036500 | -0.95065000 |
| C | 4.14267600 | 0.18931100  | -0.89959300 |
| C | 3.28846000 | -1.87377000 | -1.89826700 |
| C | 4.31086400 | -1.78751700 | -2.83877100 |
| C | 5.20359800 | -0.71450200 | -2.88127000 |
| H | 4.39502300 | -2.57768000 | -3.58131900 |
| C | 5.11721400 | 0.29467000  | -1.91134200 |
| C | 5.98442500 | 1.53710300  | -2.01153600 |
| C | 7.22554800 | 1.33622600  | -2.87697600 |
| H | 7.93870700 | 0.68395300  | -2.35549300 |
| C | 6.84137500 | 0.70070000  | -4.20926400 |
| H | 7.70545200 | 0.63255000  | -4.87653000 |
| C | 6.25920300 | -0.68940900 | -3.96973600 |
| H | 5.83394800 | -1.09515900 | -4.89325300 |
| H | 5.36497200 | 2.33286500  | -2.44959200 |
| C | 5.02452600 | 1.39975100  | 1.16365200  |
| C | 6.22772400 | 0.47601700  | 1.22320300  |
| C | 7.39127700 | 1.05787400  | 2.02119600  |
| H | 7.84503800 | 1.88755400  | 1.46279100  |
| C | 6.89818300 | 1.56722100  | 3.37191800  |
| H | 7.73241100 | 1.90525700  | 3.99350000  |
| C | 5.90886700 | 2.71063000  | 3.16503700  |
| H | 6.45902800 | 3.60443900  | 2.84084700  |
| H | 5.89868100 | -0.45954500 | 1.69759700  |

|   |             |             |             |
|---|-------------|-------------|-------------|
| H | 7.07075100  | -1.37125000 | -3.68147000 |
| H | 6.09721900  | 1.33327700  | -4.70914500 |
| H | 7.72506300  | 2.29731300  | -3.02995200 |
| H | 6.26486800  | 1.90015000  | -1.02050500 |
| H | 6.55396200  | 0.19410400  | 0.21965200  |
| H | 8.16649400  | 0.29656900  | 2.14807600  |
| H | 6.40811800  | 0.74572500  | 3.90920100  |
| H | 5.42387700  | 2.97760300  | 4.10943300  |
| O | 0.18556200  | 0.32965400  | 1.03455300  |
| H | -1.51441500 | 0.34591500  | 1.96835700  |
| C | 2.21885400  | 6.13505000  | -1.52553700 |
| C | 2.34371200  | 5.10833900  | -0.63744700 |
| C | 1.29975500  | 4.81020700  | 0.29832600  |
| C | 0.12000500  | 5.62657200  | 0.27404300  |
| C | 0.03043000  | 6.69561200  | -0.67258800 |
| C | 1.04505300  | 6.94381900  | -1.54673700 |
| C | 1.39193900  | 3.75279900  | 1.22596300  |
| C | -0.92856100 | 5.34659300  | 1.15029900  |
| C | -0.85615600 | 4.28842800  | 2.05555000  |
| C | 0.33298500  | 3.48209600  | 2.11229900  |
| C | 0.36889500  | 2.39772200  | 3.05008300  |
| H | 1.25572700  | 1.77552000  | 3.09323800  |
| C | -0.70941400 | 2.11325200  | 3.83376300  |
| C | -1.90117400 | 2.89469500  | 3.75071000  |
| C | -1.96431300 | 3.95545500  | 2.89977500  |
| H | 3.02092100  | 6.34276500  | -2.22655400 |
| H | 3.24388900  | 4.50286700  | -0.62991900 |
| H | -0.87627300 | 7.29398600  | -0.68087800 |
| H | 0.96671900  | 7.75566800  | -2.26252500 |
| H | -1.83795400 | 5.94207300  | 1.09555300  |
| H | -0.67772900 | 1.26610400  | 4.51214000  |
| H | -2.75740600 | 2.62424800  | 4.35976600  |
| H | -2.86383300 | 4.56027800  | 2.82312100  |
| C | -0.33077300 | -1.97180500 | -4.22711200 |
| C | 0.85353600  | -1.97505200 | -3.55191500 |
| C | 1.20461300  | -3.06104600 | -2.68465900 |
| C | 0.30591900  | -4.18236100 | -2.60976300 |
| C | -0.92406200 | -4.13854100 | -3.34085600 |
| C | -1.24312200 | -3.06263100 | -4.11204300 |
| C | 2.36132800  | -3.04485500 | -1.88080000 |
| C | 0.62915000  | -5.26645900 | -1.79392000 |
| C | 1.78678800  | -5.27399800 | -1.01384900 |
| C | 2.66390100  | -4.13605200 | -1.03979400 |
| C | 3.80501400  | -4.14530700 | -0.17314900 |

|   |             |             |             |
|---|-------------|-------------|-------------|
| H | 4.47157500  | -3.28932300 | -0.17737700 |
| C | 4.05595200  | -5.20530300 | 0.64815300  |
| C | 3.18815800  | -6.33645100 | 0.66513500  |
| C | 2.09048000  | -6.36672200 | -0.14185400 |
| H | -0.59582000 | -1.12245200 | -4.84853500 |
| H | 1.52788700  | -1.12947800 | -3.62503900 |
| H | -1.60915900 | -4.97677400 | -3.24861200 |
| H | -2.19414100 | -3.02513200 | -4.63606900 |
| H | -0.05128600 | -6.11325600 | -1.74186700 |
| H | 4.92367300  | -5.19048700 | 1.29948900  |
| H | 3.40438800  | -7.16765100 | 1.32801900  |
| H | 1.41644500  | -7.21863700 | -0.13224500 |
| C | -5.16523700 | -2.88759300 | -4.68737200 |
| C | -4.82249800 | -1.57761000 | -4.91094600 |
| C | -4.18257700 | -0.80944200 | -3.90701200 |
| C | -3.88505400 | -1.40735700 | -2.65083500 |
| C | -4.25346300 | -2.76613900 | -2.44732700 |
| C | -4.87783300 | -3.48267800 | -3.43631600 |
| H | -4.04818000 | 1.01161700  | -5.06542300 |
| H | -5.65618000 | -3.46705700 | -5.46188300 |
| H | -5.03770500 | -1.10583700 | -5.86621600 |
| C | -3.81016400 | 0.54482200  | -4.11340400 |
| C | -3.20682000 | -0.64863800 | -1.66144000 |
| H | -4.01878700 | -3.24548000 | -1.50076200 |
| H | -5.15080200 | -4.51848900 | -3.26010700 |
| C | -2.84264700 | 0.67812800  | -1.88873300 |
| C | -3.17269600 | 1.26860700  | -3.14669000 |
| H | -2.92648200 | 2.30966400  | -3.32177400 |
| C | -2.78758000 | -1.30805600 | -0.39359600 |
| C | -3.73035600 | -1.49655000 | 0.80007500  |
| N | -2.21729900 | 1.41675300  | -0.91695400 |
| C | -1.59184800 | 2.69799500  | -1.15958900 |
| H | -1.02061900 | 2.68565700  | -2.09774700 |
| H | -0.85953100 | 2.84972900  | -0.35560700 |
| H | -1.94286300 | 0.94001400  | -0.06871000 |
| N | -1.56410500 | -1.68365900 | -0.32274000 |
| C | -1.09969400 | -2.26850500 | 0.87856700  |
| C | 0.04015900  | -3.05461400 | 0.80026900  |
| C | -1.71769200 | -2.01067100 | 2.11282000  |
| C | 0.57661200  | -3.62751500 | 1.94500700  |
| H | 0.49735800  | -3.19176200 | -0.16836400 |
| C | -1.17521000 | -2.57871200 | 3.25909100  |
| C | -0.04212100 | -3.38928900 | 3.16581400  |
| H | 1.46587300  | -4.24770700 | 1.88239000  |

|   |             |             |             |
|---|-------------|-------------|-------------|
| H | -1.62292400 | -2.41591500 | 4.23107700  |
| C | -2.90373400 | -1.05545000 | 2.04699900  |
| O | -2.48639600 | 0.28419100  | 1.90034100  |
| C | -3.75080700 | -1.08853400 | 3.32073100  |
| F | -4.77050700 | -0.23562400 | 3.27841900  |
| F | -3.01370300 | -0.74323200 | 4.39296200  |
| F | -4.24223800 | -2.31817500 | 3.53941400  |
| H | -0.42719000 | -0.76359100 | -1.37183500 |
| C | -2.57256900 | 3.85540800  | -1.15274500 |
| C | -2.44337300 | 4.90792400  | -2.05584600 |
| C | -3.58457900 | 3.90800800  | -0.19021900 |
| C | -3.30618000 | 6.00186800  | -1.99905900 |
| H | -1.64972500 | 4.87999400  | -2.79914400 |
| C | -4.44690700 | 4.99718500  | -0.13106800 |
| H | -3.66568300 | 3.10045300  | 0.53294700  |
| C | -4.30912700 | 6.04988300  | -1.03628800 |
| H | -3.19358600 | 6.81507300  | -2.70966800 |
| H | -5.22503600 | 5.02945900  | 0.62605900  |
| H | -4.98355800 | 6.89905700  | -0.99258900 |
| C | 0.54589300  | -3.94763600 | 4.42858800  |
| F | 1.33245300  | -3.05396000 | 5.04965400  |
| F | -0.40750500 | -4.29601600 | 5.30774800  |
| F | 1.29600300  | -5.03364900 | 4.19453500  |
| C | -5.09110400 | -0.86498300 | 0.62633200  |
| C | -6.23230300 | -1.65828500 | 0.72893900  |
| C | -5.23265900 | 0.50220300  | 0.37573600  |
| C | -7.49938200 | -1.09898000 | 0.58292900  |
| H | -6.13009900 | -2.72256800 | 0.92618500  |
| C | -6.49533000 | 1.06025600  | 0.22801600  |
| H | -4.34726700 | 1.12255300  | 0.29417400  |
| C | -7.63278200 | 0.26162000  | 0.33208800  |
| H | -8.37919100 | -1.72916700 | 0.66275600  |
| H | -6.58854600 | 2.12251400  | 0.02384800  |
| H | -8.61885800 | 0.69926800  | 0.21368600  |
| H | -3.87356500 | -2.58111500 | 0.91688900  |

#### IM7d

|   |             |             |             |
|---|-------------|-------------|-------------|
| C | -5.17291600 | -2.62109800 | -2.20354500 |
| C | -5.48953500 | -1.31692800 | -1.92680000 |
| C | -4.48219100 | -0.37686000 | -1.59439300 |
| C | -3.12160400 | -0.78998100 | -1.54026900 |
| C | -2.82470100 | -2.14413500 | -1.85808100 |
| C | -3.82042900 | -3.03218600 | -2.17458800 |
| H | -5.82802800 | 1.29676800  | -1.35523800 |

|   |             |             |             |
|---|-------------|-------------|-------------|
| H | -5.94989000 | -3.33447300 | -2.45619200 |
| H | -6.52183600 | -0.97902700 | -1.96018400 |
| C | -4.78996800 | 0.97816800  | -1.31611900 |
| C | -2.11675200 | 0.14971900  | -1.17738800 |
| H | -1.78986200 | -2.47173000 | -1.88093900 |
| H | -3.56730000 | -4.05947100 | -2.41706000 |
| C | -2.44528100 | 1.48775400  | -0.95339600 |
| C | -3.81089500 | 1.88582300  | -1.02311500 |
| H | -4.07448800 | 2.92102300  | -0.84050600 |
| C | -0.71882600 | -0.28897800 | -0.91611500 |
| C | -0.44143000 | -1.31925500 | 0.19335500  |
| H | -0.27563600 | -2.29174000 | -0.29095800 |
| C | -1.60035300 | -1.44821200 | 1.16112900  |
| C | -2.13931900 | -2.70233800 | 1.44606400  |
| C | -2.14543600 | -0.31775500 | 1.78161400  |
| C | -3.19846000 | -2.83190800 | 2.33774500  |
| H | -1.72353200 | -3.58376200 | 0.96452600  |
| C | -3.20181300 | -0.44879800 | 2.67778500  |
| H | -1.76979300 | 0.67271700  | 1.52868800  |
| C | -3.73012000 | -1.70541200 | 2.95804900  |
| H | -3.61076700 | -3.81393800 | 2.54459100  |
| H | -3.62104500 | 0.43589900  | 3.14580100  |
| H | -4.55913900 | -1.80537600 | 3.65077500  |
| N | -1.46507600 | 2.38159900  | -0.56544700 |
| C | -1.73329600 | 3.77249900  | -0.28311800 |
| H | -2.51966600 | 3.82753000  | 0.48160100  |
| H | -2.11061200 | 4.31957000  | -1.16240700 |
| H | 0.14922000  | 0.14691400  | 2.28308100  |
| N | 0.21898200  | 0.25846800  | -1.59364100 |
| C | 1.54929500  | -0.13243500 | -1.36585500 |
| C | 2.45622200  | 0.14662300  | -2.38990400 |
| C | 1.97071500  | -0.77931200 | -0.19282000 |
| C | 3.78269800  | -0.23427100 | -2.27438700 |
| H | 2.08181400  | 0.65228300  | -3.27273500 |
| C | 3.30928300  | -1.14687900 | -0.07936300 |
| C | 4.19879000  | -0.88543300 | -1.11778900 |
| H | 4.49014500  | -0.03731800 | -3.07251300 |
| H | 3.68244300  | -1.65249700 | 0.79964500  |
| C | 0.91025400  | -0.96297300 | 0.88689100  |
| O | 0.84008300  | 0.24454600  | 1.60969500  |
| C | 1.28207200  | -2.06574900 | 1.89324500  |
| F | 0.38505700  | -2.13312000 | 2.88626000  |
| F | 2.45915800  | -1.83163200 | 2.48852500  |
| F | 1.34413200  | -3.26676400 | 1.30544700  |

|   |             |             |             |
|---|-------------|-------------|-------------|
| H | -0.55755000 | 2.19877300  | -0.97442600 |
| C | -0.48891100 | 4.46220500  | 0.23599300  |
| C | -0.35404100 | 5.84281000  | 0.07861400  |
| C | 0.51894500  | 3.75267600  | 0.89273100  |
| C | 0.76112700  | 6.50790600  | 0.57511800  |
| H | -1.12911900 | 6.39989800  | -0.44192900 |
| C | 1.63993700  | 4.41903500  | 1.38179200  |
| H | 0.43619800  | 2.67637200  | 1.01778600  |
| C | 1.76401200  | 5.79572800  | 1.22825800  |
| H | 0.85190200  | 7.58142800  | 0.44350300  |
| H | 2.41821100  | 3.85295900  | 1.88371200  |
| H | 2.63914800  | 6.31178500  | 1.60967700  |
| C | 5.64540100  | -1.25334700 | -0.95697800 |
| F | 6.36225900  | -0.24110100 | -0.44374000 |
| F | 5.80682000  | -2.30119300 | -0.13620600 |
| F | 6.20772100  | -1.56859300 | -2.13344400 |

**P**

|   |             |             |             |
|---|-------------|-------------|-------------|
| C | -0.77848500 | 4.81755000  | 1.37519800  |
| C | -0.47331400 | 3.59339200  | 0.83708300  |
| C | -1.44449100 | 2.85688400  | 0.10159200  |
| C | -2.74041000 | 3.42525600  | -0.05377000 |
| C | -3.02100600 | 4.69549400  | 0.50933500  |
| C | -2.06469000 | 5.38206800  | 1.21069600  |
| H | -0.02213600 | 5.36197800  | 1.93171000  |
| H | 0.52315300  | 3.18252000  | 0.96211800  |
| C | -1.17878300 | 1.56881700  | -0.44275900 |
| C | -3.72148000 | 2.69043300  | -0.76584000 |
| H | -4.01568200 | 5.11238900  | 0.37547800  |
| H | -2.28839700 | 6.35264300  | 1.64034800  |
| C | -3.44740000 | 1.46381600  | -1.30140800 |
| C | -2.15510400 | 0.88175200  | -1.15223400 |
| H | -4.71276300 | 3.11941800  | -0.88313500 |
| H | -4.22151600 | 0.92109200  | -1.83089100 |
| N | -1.88372600 | -0.37110600 | -1.67700700 |
| H | -0.90469100 | -0.57134400 | -1.81119700 |
| C | -2.77743100 | -1.03520600 | -2.60089300 |
| H | -3.12326900 | -0.34615800 | -3.38736000 |
| H | -2.19472200 | -1.81026400 | -3.10809300 |
| C | -3.98198000 | -1.68612900 | -1.94271800 |
| C | -4.95033400 | -2.29096400 | -2.74729500 |
| C | -4.14430700 | -1.69514700 | -0.55939800 |
| C | -6.05794000 | -2.90793400 | -2.17780200 |
| H | -4.83277500 | -2.28062100 | -3.82882000 |



|           |             |             |             |
|-----------|-------------|-------------|-------------|
| C         | -5.25632900 | -2.31090100 | 0.01088400  |
| H         | -3.39952200 | -1.21760300 | 0.06977500  |
| C         | -6.21371000 | -2.91974900 | -0.79295900 |
| H         | -6.80123100 | -3.37797000 | -2.81394300 |
| H         | -5.36926100 | -2.30833900 | 1.09087400  |
| H         | -7.07929100 | -3.39836100 | -0.34635000 |
| C         | 4.62551500  | 0.98712900  | -1.85123900 |
| C         | 3.35088500  | 1.47768400  | -1.84981000 |
| C         | 2.38024000  | 0.94998900  | -0.95825100 |
| C         | 2.73351700  | -0.07144500 | -0.04235800 |
| C         | 4.06346600  | -0.57514300 | -0.07153400 |
| C         | 4.96929100  | -0.05538500 | -0.95659000 |
| H         | 5.37518000  | 1.37599900  | -2.53255000 |
| H         | 3.03062100  | 2.26592500  | -2.52157200 |
| C         | 1.70261700  | -0.54778000 | 0.82720900  |
| H         | 4.36780400  | -1.37810400 | 0.58599900  |
| C         | 0.40502700  | -0.09918500 | 0.67848400  |
| C         | 0.17695100  | 0.96251600  | -0.27742500 |
| N         | 1.12342000  | 1.46256300  | -1.03495500 |
| C         | -0.75111500 | -0.69243000 | 1.40864500  |
| C         | -1.00618500 | -2.06269900 | 1.28432900  |
| C         | -1.58967500 | 0.08874800  | 2.20748000  |
| C         | -2.06113600 | -2.64932600 | 1.97217700  |
| H         | -0.36086100 | -2.66982800 | 0.65480000  |
| C         | -2.64898100 | -0.49990500 | 2.89214800  |
| H         | -1.40227600 | 1.15355300  | 2.30626400  |
| C         | -2.88146300 | -1.86831200 | 2.78329900  |
| H         | -2.24831500 | -3.71277500 | 1.86774800  |
| H         | -3.28804800 | 0.11396000  | 3.51803100  |
| H         | -3.70221600 | -2.32546500 | 3.32702600  |
| C         | 2.12482000  | -1.52577200 | 1.90953600  |
| F         | 2.40026600  | -2.73160900 | 1.38165300  |
| F         | 3.24789600  | -1.09553400 | 2.51103400  |
| F         | 1.23262400  | -1.70015400 | 2.87948200  |
| C         | 6.37544500  | -0.58018900 | -1.00859600 |
| F         | 6.57589400  | -1.59275600 | -0.15747700 |
| F         | 7.26248600  | 0.38144300  | -0.71031300 |
| F         | 6.68308000  | -1.01810300 | -2.23924700 |
| <b>mP</b> |             |             |             |
| C         | 1.92133700  | -2.83907300 | 3.18370600  |
| C         | 1.39992600  | -1.99061400 | 2.24113400  |
| C         | 2.24508900  | -1.30973600 | 1.32245700  |
| C         | 3.64856000  | -1.51534600 | 1.42534400  |

|   |             |             |             |
|---|-------------|-------------|-------------|
| C | 4.15772400  | -2.39845800 | 2.41002500  |
| C | 3.31617500  | -3.05384900 | 3.27040900  |
| H | 1.25677200  | -3.34774800 | 3.87492200  |
| H | 0.32735300  | -1.82460100 | 2.20101800  |
| C | 1.74002000  | -0.42936800 | 0.32380500  |
| C | 4.50258300  | -0.80927300 | 0.54112700  |
| H | 5.23319900  | -2.54241700 | 2.47010300  |
| H | 3.71366100  | -3.72863800 | 4.02098500  |
| C | 4.00604700  | 0.05691200  | -0.39118800 |
| C | 2.60246000  | 0.25837500  | -0.52010900 |
| H | 5.57607600  | -0.95464600 | 0.62410400  |
| H | 4.68745000  | 0.60367500  | -1.03210300 |
| N | 2.09445100  | 1.07156000  | -1.53164100 |
| H | 1.16094000  | 1.40511200  | -1.33240500 |
| C | 2.92576500  | 2.07323800  | -2.16806300 |
| H | 3.74492400  | 1.58082200  | -2.70365100 |
| H | 2.31007500  | 2.54463400  | -2.94134400 |
| C | 3.48640200  | 3.14594600  | -1.24687600 |
| C | 4.58633800  | 3.89951600  | -1.66023000 |
| C | 2.90656300  | 3.41476000  | -0.00662600 |
| C | 5.09475700  | 4.91317200  | -0.85556000 |
| H | 5.04884900  | 3.68875200  | -2.62199000 |
| C | 3.41791900  | 4.42792200  | 0.80063800  |
| H | 2.06047600  | 2.82406800  | 0.33772200  |
| C | 4.50970500  | 5.18018400  | 0.37958500  |
| H | 5.95130500  | 5.49027300  | -1.18929000 |
| H | 2.96238500  | 4.62518200  | 1.76590800  |
| H | 4.90736600  | 5.96696600  | 1.01237500  |
| C | -3.31143900 | 2.75843700  | 0.92237500  |
| C | -1.97658300 | 2.46840500  | 0.90412000  |
| C | -1.52632200 | 1.19395000  | 0.47219100  |
| C | -2.45611100 | 0.22097900  | 0.03046300  |
| C | -3.84055200 | 0.54103100  | 0.07185900  |
| C | -4.24203000 | 1.77498600  | 0.50910000  |
| H | -3.66945600 | 3.72679600  | 1.25631100  |
| H | -1.22454300 | 3.18076800  | 1.22457300  |
| C | -1.92495100 | -1.02267900 | -0.43955700 |
| H | -4.58612200 | -0.18186700 | -0.23095400 |
| C | -0.57388200 | -1.27779600 | -0.34968300 |
| C | 0.26792500  | -0.22640300 | 0.17885500  |
| N | -0.18723100 | 0.95580300  | 0.52064700  |
| C | 0.08919300  | -2.54581100 | -0.76727700 |
| C | -0.18452400 | -3.74547400 | -0.10746000 |
| C | 1.04623300  | -2.52078100 | -1.78416800 |

|   |             |             |             |
|---|-------------|-------------|-------------|
| C | 0.48911400  | -4.90824500 | -0.46175300 |
| H | -0.92661700 | -3.76251500 | 0.68649500  |
| C | 1.71413400  | -3.68696300 | -2.14065300 |
| H | 1.26907700  | -1.58259500 | -2.28658200 |
| C | 1.43949800  | -4.88011700 | -1.47834700 |
| H | 0.27477900  | -5.83496600 | 0.05993400  |
| H | 2.45505400  | -3.66085700 | -2.93273000 |
| H | 1.96806000  | -5.78738500 | -1.75215900 |
| C | -2.91905900 | -1.98299500 | -1.06493600 |
| F | -3.76420300 | -2.45699400 | -0.13226400 |
| F | -3.66632800 | -1.34543400 | -1.98273100 |
| F | -2.37504800 | -3.02651000 | -1.68106500 |
| C | -5.70033000 | 2.12873100  | 0.56950400  |
| F | -6.48630700 | 1.13386000  | 0.14285500  |
| F | -5.96711600 | 3.20779400  | -0.18222500 |
| F | -6.07407300 | 2.43153600  | 1.82214700  |

### TSX

Value of imaginary frequency = -29.33 cm<sup>-1</sup>

|   |             |             |             |
|---|-------------|-------------|-------------|
| C | -0.10987800 | 4.73032500  | 0.62729800  |
| C | -0.11213900 | 3.35901700  | 0.53650000  |
| C | -1.10486200 | 2.65114400  | -0.19772100 |
| C | -2.14239300 | 3.44634200  | -0.75150400 |
| C | -2.09729500 | 4.85999400  | -0.69053500 |
| C | -1.08883800 | 5.50544300  | -0.02496500 |
| H | 0.65538100  | 5.21840500  | 1.22296800  |
| H | 0.64572300  | 2.80804400  | 1.07565600  |
| C | -1.14915200 | 1.18754000  | -0.30373700 |
| C | -3.27571800 | 2.79585800  | -1.31020300 |
| H | -2.90303000 | 5.41908700  | -1.15869600 |
| H | -1.06326700 | 6.58834900  | 0.03268700  |
| C | -3.45077400 | 1.46431400  | -1.13157700 |
| C | -2.44525000 | 0.64961100  | -0.50625000 |
| H | -4.04216000 | 3.38835600  | -1.80176300 |
| H | -4.37538000 | 0.99689500  | -1.44629800 |
| N | -2.83269900 | -0.59982000 | -0.13375500 |
| H | -2.20896300 | -1.13734900 | 0.43940500  |
| C | -4.09149500 | -1.23022400 | -0.46370800 |
| H | -4.26302400 | -1.19345600 | -1.54786600 |
| H | -3.97500300 | -2.28886900 | -0.21384300 |
| C | -5.30784200 | -0.68187600 | 0.26629900  |
| C | -6.58210300 | -0.98691000 | -0.21509700 |
| C | -5.18511400 | 0.09159200  | 1.41859300  |
| C | -7.71673800 | -0.53506000 | 0.44974600  |

|   |             |             |             |
|---|-------------|-------------|-------------|
| H | -6.68556300 | -1.58275200 | -1.11923000 |
| C | -6.32038000 | 0.54764700  | 2.08323800  |
| H | -4.19563800 | 0.34525100  | 1.78656100  |
| C | -7.58798100 | 0.23469600  | 1.60309800  |
| H | -8.70159500 | -0.77881000 | 0.06426900  |
| H | -6.21206700 | 1.15359700  | 2.97713900  |
| H | -8.47177600 | 0.59275900  | 2.12085200  |
| C | 4.70897700  | 1.92804200  | -0.32816300 |
| C | 3.38683500  | 2.11441000  | -0.60761800 |
| C | 2.46100000  | 1.04595500  | -0.43399300 |
| C | 2.91473100  | -0.24186000 | -0.05986600 |
| C | 4.29084900  | -0.39840900 | 0.26514600  |
| C | 5.14709900  | 0.66312900  | 0.13746800  |
| H | 5.42477800  | 2.73713500  | -0.43193500 |
| H | 2.98442300  | 3.06992100  | -0.92568800 |
| C | 1.90129700  | -1.24980700 | -0.07882600 |
| H | 4.67722200  | -1.33689000 | 0.63307800  |
| C | 0.55693200  | -0.92251300 | -0.19378700 |
| C | 0.18317300  | 0.48915200  | -0.32684900 |
| N | 1.16070900  | 1.34225100  | -0.58177500 |
| C | -0.40651100 | -2.05820200 | -0.28567200 |
| C | -0.93384300 | -2.41418900 | -1.53091600 |
| C | -0.72225200 | -2.82293500 | 0.83931900  |
| C | -1.75442000 | -3.52753400 | -1.65032400 |
| H | -0.68685200 | -1.81578100 | -2.40279300 |
| C | -1.56433600 | -3.92900200 | 0.72008200  |
| H | -0.29990800 | -2.55769300 | 1.80363100  |
| C | -2.07015500 | -4.28946000 | -0.52438100 |
| H | -2.14877100 | -3.80556400 | -2.62233700 |
| H | -1.80724500 | -4.51703300 | 1.59891700  |
| H | -2.71101400 | -5.15993300 | -0.61916100 |
| C | 2.33456300  | -2.71119700 | 0.03088800  |
| F | 3.61357800  | -2.88589300 | -0.33611100 |
| F | 2.23051200  | -3.14472200 | 1.29831000  |
| F | 1.63812600  | -3.54742900 | -0.74213200 |
| C | 6.59724500  | 0.52038100  | 0.49404500  |
| F | 6.90106400  | -0.70636900 | 0.93544500  |
| F | 6.95176100  | 1.39212300  | 1.45240000  |
| F | 7.38587800  | 0.77527100  | -0.56269100 |

### TSad

Value of imaginary frequency = -16.28 cm<sup>-1</sup>

|   |             |             |            |
|---|-------------|-------------|------------|
| C | 0.71997000  | -4.84793200 | 1.42564400 |
| C | -0.64230800 | -4.72464200 | 1.35375700 |

|   |             |             |             |
|---|-------------|-------------|-------------|
| C | -1.25793600 | -3.46564200 | 1.15709000  |
| C | -0.48271300 | -2.28556100 | 0.94081900  |
| C | 0.92244600  | -2.44857400 | 1.12862000  |
| C | 1.49667900  | -3.67765000 | 1.35483900  |
| H | -3.25392400 | -4.27132500 | 1.39209600  |
| H | 1.18672300  | -5.81389100 | 1.58358700  |
| H | -1.28562900 | -5.59176900 | 1.47663300  |
| C | -2.67021800 | -3.36604400 | 1.25184300  |
| C | -1.16407600 | -1.02676700 | 0.64256600  |
| H | 1.57116200  | -1.58860800 | 1.16842700  |
| H | 2.57070600  | -3.73237200 | 1.50349900  |
| C | -2.52924700 | -0.96041100 | 0.99811700  |
| C | -3.27777900 | -2.15300400 | 1.24960600  |
| H | -4.34978300 | -2.08099500 | 1.38880000  |
| C | -0.48342700 | 0.08554400  | -0.08336800 |
| C | -0.86265900 | 1.28828900  | -0.60045700 |
| H | -0.03847400 | 1.77445100  | -1.12068000 |
| C | -2.09042800 | 2.11871300  | -0.68447800 |
| C | -3.18899000 | 1.72899600  | -1.45543200 |
| C | -2.12593800 | 3.36293200  | -0.04240300 |
| C | -4.31361200 | 2.54160700  | -1.55031400 |
| H | -3.16266100 | 0.76991600  | -1.96216000 |
| C | -3.25356600 | 4.17490800  | -0.13217000 |
| H | -1.26788300 | 3.68644100  | 0.54090800  |
| C | -4.35174200 | 3.76337200  | -0.88295400 |
| H | -5.17065700 | 2.20407400  | -2.12540000 |
| H | -3.27265200 | 5.12870200  | 0.38518100  |
| H | -5.23359500 | 4.39206900  | -0.94861500 |
| N | -3.18830300 | 0.22838700  | 1.07787200  |
| C | -4.55985800 | 0.41640200  | 1.50024700  |
| H | -4.63963900 | 1.45724100  | 1.82648200  |
| H | -4.77392600 | -0.20001300 | 2.38532300  |
| H | -2.62107200 | 1.05742000  | 1.09857600  |
| N | 0.86938400  | -0.22388600 | -0.46688500 |
| C | 1.98778900  | 0.42724900  | -0.08366500 |
| C | 1.93265000  | 1.49978800  | 0.84888500  |
| C | 3.27631600  | 0.02183400  | -0.56185300 |
| C | 3.07289200  | 2.14871400  | 1.24604300  |
| H | 0.97112100  | 1.79164800  | 1.24992100  |
| C | 4.42322100  | 0.72339700  | -0.13803800 |
| C | 4.33152200  | 1.77329200  | 0.74344200  |
| H | 3.00574100  | 2.95982900  | 1.96524200  |
| H | 5.40183400  | 0.43621500  | -0.50050700 |
| C | 3.39842500  | -1.11019500 | -1.47626800 |

|   |             |             |             |
|---|-------------|-------------|-------------|
| O | 2.47970400  | -1.79819600 | -1.88722400 |
| C | 4.80947600  | -1.49880600 | -1.98321700 |
| F | 4.73937700  | -2.53114100 | -2.80872900 |
| F | 5.61079200  | -1.83394000 | -0.96103600 |
| F | 5.38616600  | -0.47924300 | -2.63589900 |
| H | 1.00993700  | -1.04728100 | -1.04428400 |
| C | -5.62591700 | 0.17388800  | 0.44275200  |
| C | -5.39547900 | -0.58708400 | -0.70302700 |
| C | -6.88622800 | 0.74497400  | 0.62886600  |
| C | -6.40516600 | -0.76883300 | -1.64543600 |
| H | -4.41794700 | -1.02806900 | -0.87035000 |
| C | -7.89576100 | 0.56558000  | -0.31039800 |
| H | -7.07416400 | 1.34875100  | 1.51370000  |
| C | -7.65698600 | -0.19233300 | -1.45397300 |
| H | -6.20911700 | -1.36139600 | -2.53345500 |
| H | -8.86652100 | 1.02474100  | -0.15354000 |
| H | -8.44109500 | -0.33072200 | -2.19104800 |
| C | 5.54192600  | 2.52497300  | 1.19515100  |
| F | 5.67492200  | 2.49128000  | 2.53232300  |
| F | 6.67079900  | 2.03344800  | 0.66655900  |
| F | 5.47312800  | 3.82439200  | 0.85872900  |

### TSbc

Value of imaginary frequency = -19.42 cm<sup>-1</sup>

|   |             |             |             |
|---|-------------|-------------|-------------|
| C | 6.07628300  | -2.58561300 | 0.82364500  |
| C | 6.23777000  | -1.25839400 | 0.50933600  |
| C | 5.13754100  | -0.46126500 | 0.12148100  |
| C | 3.81974800  | -0.99735600 | 0.12850000  |
| C | 3.70848600  | -2.39266800 | 0.35996600  |
| C | 4.79935900  | -3.16139400 | 0.69944400  |
| H | 6.34289700  | 1.28018000  | -0.35461000 |
| H | 6.92731200  | -3.19409500 | 1.10978900  |
| H | 7.22475300  | -0.80363300 | 0.52041400  |
| C | 5.34120400  | 0.86015700  | -0.36960200 |
| C | 2.69278300  | -0.13631500 | -0.18702900 |
| H | 2.76561500  | -2.88827500 | 0.17067100  |
| H | 4.67305900  | -4.22988700 | 0.84271800  |
| C | 2.98291800  | 1.01675600  | -0.94458500 |
| C | 4.31904800  | 1.53557300  | -0.95545300 |
| H | 4.51400900  | 2.47859000  | -1.45300300 |
| C | 1.35025300  | -0.34476700 | 0.41664300  |
| C | 0.98658300  | -1.34124400 | 1.25865500  |
| H | 1.65356200  | -2.17611800 | 1.40316600  |
| C | -0.24931600 | -1.42703000 | 2.06286700  |

|   |             |             |             |
|---|-------------|-------------|-------------|
| C | -0.91910400 | -2.65543700 | 2.13600600  |
| C | -0.76082000 | -0.34916800 | 2.79723600  |
| C | -2.08529100 | -2.79218400 | 2.87991800  |
| H | -0.52753200 | -3.50435700 | 1.58304700  |
| C | -1.92252700 | -0.48694000 | 3.54723600  |
| H | -0.23533100 | 0.60107500  | 2.78283100  |
| C | -2.59574300 | -1.70524000 | 3.58337000  |
| H | -2.59667600 | -3.74898400 | 2.90848000  |
| H | -2.30340900 | 0.36155600  | 4.10697500  |
| H | -3.50779600 | -1.80781000 | 4.16206300  |
| N | 2.03713200  | 1.63948900  | -1.73100200 |
| C | 1.89838000  | 3.07577200  | -1.89394900 |
| H | 1.34558900  | 3.25122300  | -2.82110200 |
| H | 2.88515700  | 3.52368100  | -2.03491100 |
| H | 1.18220900  | 1.10878400  | -1.82741400 |
| N | 0.41202100  | 0.72210000  | 0.22935400  |
| C | -0.91799100 | 0.60079000  | -0.06333400 |
| C | -1.80837800 | 1.58290600  | 0.41817000  |
| C | -1.44740800 | -0.47598700 | -0.81509000 |
| C | -3.16781100 | 1.44575600  | 0.24677100  |
| H | -1.40225300 | 2.42945900  | 0.96555600  |
| C | -2.83595100 | -0.62751000 | -0.92780100 |
| C | -3.69246300 | 0.31911900  | -0.39967000 |
| H | -3.84158300 | 2.20206200  | 0.63774300  |
| H | -3.24723700 | -1.46771700 | -1.47610500 |
| C | -0.56197800 | -1.32814600 | -1.62761500 |
| O | 0.47402700  | -0.96441600 | -2.13922700 |
| C | -1.01786000 | -2.77597800 | -1.91645600 |
| F | 0.00942200  | -3.52120500 | -2.30037700 |
| F | -1.93645200 | -2.79024800 | -2.89612400 |
| F | -1.57016400 | -3.33880000 | -0.83599900 |
| H | 0.69493900  | 1.62593200  | 0.59216900  |
| C | 1.18499400  | 3.76439800  | -0.74304200 |
| C | 1.75313600  | 3.76687000  | 0.53852000  |
| C | -0.05448600 | 4.37492500  | -0.92903900 |
| C | 1.08479900  | 4.35602900  | 1.60770300  |
| H | 2.72334700  | 3.29996800  | 0.69590700  |
| C | -0.71477200 | 4.98748100  | 0.13567700  |
| H | -0.50792400 | 4.37370400  | -1.91671500 |
| C | -0.15039500 | 4.97378900  | 1.40698700  |
| H | 1.53478000  | 4.34827200  | 2.59532000  |
| H | -1.67557800 | 5.46478800  | -0.02897400 |
| H | -0.66457200 | 5.44466400  | 2.23833400  |
| C | -5.17618400 | 0.15731100  | -0.49180900 |

|   |             |             |             |
|---|-------------|-------------|-------------|
| F | -5.77221900 | 1.29539300  | -0.88758400 |
| F | -5.52629500 | -0.80445400 | -1.35796200 |
| F | -5.72234400 | -0.16055700 | 0.69372000  |
